# Supplementary material for: Differentially Expressed MicroRNAs in Maternal Plasma for the Noninvasive Prenatal Diagnosis of Down Syndrome (Trisomy 21)
Source: Biomed Res Int. 2014 Nov 12;2014:402475. doi: 10.1155/2014/402475 (PMC4244954; doi:10.1155/2014/402475)
Supplement: Supplementary file 1 — Supplement 1 provides an overview of the HT-qPCR results and bioinformatical analysis. [file 402475.f1.zip]

Archive with 2 entries (2 files):
- Supplementary_Table_1_HTqPCR_and_Bioinformatics_2738_1097285.xlsx
- Supplementary_Table_2_Predicted_miRNA_Target_Gene_Union_2738_1097286.xlsx
