# Supplementary material for: Differentially Expressed MicroRNAs in Maternal Plasma for the Noninvasive Prenatal Diagnosis of Down Syndrome (Trisomy 21)
Source: Biomed Res Int. 2014 Nov 12;2014:402475. doi: 10.1155/2014/402475 (PMC4244954; doi:10.1155/2014/402475)
Supplement: Supplementary file 1 — Supplement 1 provides an overview of the HT-qPCR results and bioinformatical analysis. [file 402475.f1.zip › Supplementary_Table_1_HTqPCR_and_Bioinformatics_2738_1097285.xlsx]

## Sheet: Study Design HT-qPCR
	Table 1: Detailed overview of investigated samples
	Sample	Group	Sample ID	maternal age	week of	fetal sex	additional notes
				[years]	gestation
	1		K1	36	12+1	female	increased NT
	2		41	43	13+3	female	NT 5,1
	3	Trisomy 21	42	35	19+0	female	AV Kanal
	4		102	37	13+3	male	NT 4,2
	5		107	34	13+3	male	NT 7,5
	6		108	42	13+4	male	NT 6,6
	7		109	44	13+6	female	NT 6,6, Softmarker
	Match 1		84	42	13+1	female	-
	Match 2		72	41	13+0	female	-
	Match 3		74	42	17+0	female	-
	Match 4	healthy	68	40	13+3	male	-
	Match 5	pregnancy	87	31	13+3	male	-
	Match 6		21	41	14+2	male	-
	Match 7		61	35	13+5	female	-

## Sheet: Raw_HT-qPCR Report
	Cq														delta Cq (Cq abzgl. Background (Cq-Werte der No Template Control))														% fluorescence signal due to non-specific product														Relative Quantities(**)
Primer	21_C_m	61_C_f	K1_T21_f	41_T21_f	42_T21_f	74_C_f	84_C_f	72_C_f	68_C_m	102_T21_m	109_T21_f	87_C_m	107_T21_m	108_T21_m	21_C_m	61_C_f	K1_T21_f	41_T21_f	42_T21_f	74_C_f	84_C_f	72_C_f	68_C_m	102_T21_m	109_T21_f	87_C_m	107_T21_m	108_T21_m	21_C_m	61_C_f	K1_T21_f	41_T21_f	42_T21_f	74_C_f	84_C_f	72_C_f	68_C_m	102_T21_m	109_T21_f	87_C_m	107_T21_m	108_T21_m	21_C_m	102_T21_m	107_T21_m	109_T21_f	61_C_f	42_T21_f	84_C_f
HSA-LET-7B*	0	31.458		31.8452	28.5545	27.9625		29.6112	31.3036	31.6039	31.08	28.9458	28.5609	30.4514	0	31.458	0	31.8452	28.5545	27.9625	0	29.6112	31.3036	31.6039	31.08	28.9458	28.5609	30.4514		3.38999e-08		2.5921e-08	2.53647e-07	3.82336e-07		1.21935e-07	3.77302e-08	3.06392e-08	4.4053e-08	1.9339e-07	2.52523e-07	6.8113e-08	NaN	0.6914	1.288	0.563	0.7168	2.176	NaN
HSA-LET-7C*	0	0													0	0	0	0	0	0	0	0	0	0	0	0	0	0															NaN	NaN	NaN	NaN	NaN	NaN	NaN
HSA-MIR-1	0	0		34.0166	32.5886				32.2832		33.2424		32.7063	32.6437	0	0	0	34.0166	32.5886	0	0	0	32.2832	0	33.2424	0	32.7063	32.6437				5.75413e-09	1.54831e-08				1.91334e-08		9.84137e-09		1.42704e-08	1.49028e-08	NaN	NaN	0.507	0.8765	NaN	0.9255	NaN
HSA-MIR-100*	0	0								32.5172					0	0	0	0	0	0	0	0	0	32.5172	0	0	0	0										1.62682e-08					NaN	1	NaN	NaN	NaN	NaN	NaN
HSA-MIR-103-AS	0	0												31.5873	0	0	0	0	0	0	0	0	0	0	0	0	0	-3.75962															NaN	NaN	NaN	NaN	NaN	NaN	NaN
HSA-MIR-105	0	0										34.1514			0	0	0	0	0	0	0	0	0	0	0	34.1514	0	0												5.24073e-09			NaN	NaN	NaN	NaN	NaN	NaN	NaN
HSA-MIR-106A*	0	30.989		30.9661	32.3552	30.3576	31.7609	30.7734	29.5132		30.6502	29.9936	28.9844	29.0153	0	30.989	0	30.9661	32.3552	30.3576	31.7609	30.7734	29.5132	0	30.6502	29.9936	28.9844	29.0153		4.6922e-08		4.7672e-08	1.82019e-08	7.26857e-08	2.74802e-08	5.44847e-08	1.30508e-07		5.93415e-08	9.35444e-08	1.88286e-07	1.84298e-07	NaN	NaN	1.315	1.039	1.359	0.2139	0.4206
HSA-MIR-106B*	0	28.1019	27.2869	29.5504	28.4995	27.7215	28.5809	27.4274	30.3211	30.499	29.4662	27.6284	26.2831	28.8915	0	2.28003	3.09506	0.831539	1.88242	2.66049	1.80107	2.95454	0.0608185	-0.117072	0.915748	2.75359	4.09885	1.49042		20.5894	11.7029	56.193	27.1229	15.8166	28.6962	12.9002	95.872		53.0069	14.8282	5.83611	35.5909	NaN	0.4765	2.001	0.5522	2.352	0.7244	0.8917
HSA-MIR-10B*	0	31.1654		30.8971	30.6506	32.2223	30.667	30.659	30.2416		29.2498	31.5433		30.7904	0	31.1654	0	30.8971	30.6506	32.2223	30.667	30.659	30.2416	0	29.2498	31.5433	0	30.7904		4.15224e-08		5.00098e-08	5.93279e-08	1.99576e-08	5.86541e-08	5.89835e-08	7.87741e-08		1.56652e-07	3.19528e-08		5.38494e-08	NaN	NaN	NaN	3.174	1.392	0.8069	1.039
HSA-MIR-1178	0	0								30.7735			32.8989		0	0	0	0	0	0	0	0	0	30.7735	0	0	32.8989	0										5.44805e-08			1.24868e-08		NaN	4.394	0.2276	NaN	NaN	NaN	NaN
HSA-MIR-1179	0	0										31.1825	31.749	31.2965	0	0	0	0	0	0	0	0	0	0	0	31.1825	31.749	31.2965												4.10323e-08	2.77082e-08	3.79143e-08	NaN	NaN	0.4927	NaN	NaN	NaN	NaN
HSA-MIR-1182	0	32.9865	30.9002	34.8749				31.4373						33.5096	0	0.813801	2.90009	-1.07458	0	0	0	2.36302	0	0	0	0	0	0.290683		56.8881	13.3963					19.4383						81.7515	NaN	NaN	NaN	NaN	1.366	NaN	NaN
HSA-MIR-1183	0	0													0	0	0	0	0	0	0	0	0	0	0	0	0	0															NaN	NaN	NaN	NaN	NaN	NaN	NaN
HSA-MIR-1185	0	0						29.7088			33.2176				0	0	0	0	0	0	0	29.7088	0	0	33.2176	0	0	0								1.13962e-07			1.00116e-08				NaN	NaN	NaN	0.3572	NaN	NaN	NaN
HSA-MIR-1193	0	0	30.4534	33.4458	29.7403	29.1958		31.8529	33.6378	30.4011	29.7077		29.5616	34.3659	0	0	30.4534	33.4458	29.7403	29.1958	0	31.8529	33.6378	30.4011	29.7077	0	29.5616	34.3659			6.80158e-08	8.54683e-09	1.11502e-07	1.62621e-07		2.57825e-08	7.48213e-09	7.05287e-08	1.1405e-07		1.262e-07	4.51679e-09	NaN	3.635	1.47	3.329	NaN	2.185	NaN
HSA-MIR-1197	0	0						33.9984							0	0	0	0	0	0	0	33.9984	0	0	0	0	0	0								5.82706e-09							NaN	NaN	NaN	NaN	NaN	NaN	NaN
HSA-MIR-1200	0	0			30.5578		31.5971		30.9355	30.991	33.9068		33.4811		0	0	0	0	1.90079	0	0.861396	0	1.523	1.46754	-1.44824	0	-1.0226	0					26.7797		55.042		34.7963	36.1599					NaN	3.444	0.1385	0.2585	NaN	1.768	1.12
HSA-MIR-1206	0	0													0	0	0	0	0	0	0	0	0	0	0	0	0	0															NaN	NaN	NaN	NaN	NaN	NaN	NaN
HSA-MIR-1224-5P	0	32.1091		32.6851	34.2807		30.9204		31.26	32.2642			30.4445		0	32.1091	0	32.6851	34.2807	0	30.9204	0	31.26	32.2642	0	0	30.4445	0		2.15874e-08		1.44808e-08	4.79161e-09		4.92083e-08		3.8886e-08	1.93867e-08			6.84372e-08		NaN	1.327	1.059	NaN	1.385	0.1247	1.668
HSA-MIR-1225-5P	0	0	30.6168			29.0813		29.0472			29.7631		28.5222	29.6396	0	0	30.6168	0	0	29.0813	0	29.0472	0	0	29.7631	0	28.5222	29.6396			6.07326e-08			1.76064e-07		1.8027e-07			1.09755e-07		2.59386e-07	1.1956e-07	NaN	NaN	1.18	1.252	NaN	NaN	NaN
HSA-MIR-1236	0	32.8042	31.5372				31.4793					30.1889	29.5818	34.5893	0	32.8042	31.5372	0	0	0	31.4793	0	0	0	0	30.1889	29.5818	34.5893		1.33336e-08	3.20899e-08				3.34033e-08					8.17048e-08	1.24447e-07	3.86897e-09	NaN	NaN	2.052	NaN	0.9115	NaN	1.207
HSA-MIR-1243	0	0													0	0	0	0	0	0	0	0	0	0	0	0	0	0															NaN	NaN	NaN	NaN	NaN	NaN	NaN
HSA-MIR-1248	0	0						33.2042					32.4153		0	0	0	0	0	0	0	33.2042	0	0	0	0	32.4153	0								1.01048e-08					1.74596e-08		NaN	NaN	1.001	NaN	NaN	NaN	NaN
HSA-MIR-1250	0	0	34.1404		31.6305	34.2105		33.2265		32.6223					0	0	34.1404	0	31.6305	34.2105	0	33.2265	0	32.6223	0	0	0	0			5.28088e-09		3.00791e-08	5.03066e-09		9.95036e-09		1.51259e-08					NaN	3.307	NaN	NaN	NaN	2.5	NaN
HSA-MIR-1252	0	0													0	0	0	0	0	0	0	0	0	0	0	0	0	0															NaN	NaN	NaN	NaN	NaN	NaN	NaN
HSA-MIR-1255A	0	0		32.6165								34.6677			0	0	0	32.6165	0	0	0	0	0	0	0	34.6677	0	0				1.5186e-08								3.66433e-09			NaN	NaN	NaN	NaN	NaN	NaN	NaN
HSA-MIR-1255B	0	0						32.0903							0	0	0	0	0	0	0	32.0903	0	0	0	0	0	0								2.18698e-08							NaN	NaN	NaN	NaN	NaN	NaN	NaN
HSA-MIR-1256	0	30.232				29.4529	30.2923	30.2903	30.4138			30.1009	30.8136		0	-1.14666	0	0	0	-0.367522	-1.20691	-1.20492	-1.32844	0	0	-1.01549	-1.72821	0															NaN	NaN	0.3203	NaN	1.987	NaN	1.007
HSA-MIR-1257	0	32.4467		31.7871		32.1957		34.6568		32.7867		32.7248	31.7681		0	-0.156219	0	0.503354	0	0.0947239	0	-2.36633	0	-0.496276	0	-0.434326	0.522354	0				70.5465		93.6451							69.6235		NaN	1.803	0.8254	NaN	2.139	NaN	NaN
HSA-MIR-1258	0	30.6367	32.579	30.0718		31.1977	32.3855	32.2642		29.303		30.1655		29.7609	0	-1.79938	-3.74167	-1.23451	0	-2.36039	-3.54815	-3.42693	0	-0.465651	0	-1.32822	0	-0.923581															NaN	5.789	NaN	NaN	2.152	NaN	0.3383
HSA-MIR-125A-3P	0	0							30.6772						0	0	0	0	0	0	0	0	30.6772	0	0	0	0	0									5.82428e-08						NaN	NaN	NaN	NaN	NaN	NaN	NaN
HSA-MIR-125B-1*	0	0	30.5218												0	0	0.51787	0	0	0	0	0	0	0	0	0	0	0			69.8402												NaN	NaN	NaN	NaN	NaN	NaN	NaN
HSA-MIR-1261	0	0													0	0	0	0	0	0	0	0	0	0	0	0	0	0															NaN	NaN	NaN	NaN	NaN	NaN	NaN
HSA-MIR-1262	0	0								29.8853		31.2292	30.8895		0	0	0	0	0	0	0	0	0	29.8853	0	31.2292	30.8895	0										1.0084e-07		3.97259e-08	5.02715e-08		NaN	3.52	0.3966	NaN	NaN	NaN	NaN
HSA-MIR-1264	0	0													0	0	0	0	0	0	0	0	0	0	0	0	0	0															NaN	NaN	NaN	NaN	NaN	NaN	NaN
HSA-MIR-127-5P	0	0	32.1127			32.6979	31.7077	31.3073		33.165	31.9806		34.1978	34.0428	0	0	32.1127	0	0	32.6979	31.7077	31.3073	0	33.165	31.9806	0	34.1978	34.0428			2.15338e-08			1.43528e-08	2.85126e-08	3.7632e-08		1.03833e-08	2.35988e-08		5.07486e-09	5.65066e-09	NaN	1.636	0.1807	2.106	NaN	NaN	2.224
HSA-MIR-1272	0	34.0353				32.361	33.2914				29.8663				0	34.0353	0	0	0	32.361	33.2914	0	0	0	29.8663	0	0	0		5.68003e-09				1.81294e-08	9.5126e-09				1.02176e-07				NaN	NaN	NaN	6.712	0.6173	NaN	0.5462
HSA-MIR-1273	0	0			34.1525		33.4057		31.2352	31.0299	32.3003		31.3967		0	0	0	0	-3.86515	0	-3.11835	0	-0.947769	-0.742499	-2.01291	0	-1.10932	0															NaN	4.248	0.7445	0.9975	NaN	0.1854	0.4052
HSA-MIR-1273C	0	0						34.2083				31.056			0	0	0	0	0	0	0	34.2083	0	0	0	31.056	0	0								5.03806e-09				4.47932e-08			NaN	NaN	NaN	NaN	NaN	NaN	NaN
HSA-MIR-1273D	0	0	34.2631	32.0905	31.2761	31.6937				32.7122	31.7471			32.4092	0	0	34.2631	32.0905	31.2761	31.6937	0	0	0	32.7122	31.7471	0	0	32.4092			4.85028e-09	2.18675e-08	3.84553e-08	2.87895e-08				1.42119e-08	2.77447e-08			1.75331e-08	NaN	1.51	NaN	1.67	NaN	1.554	NaN
HSA-MIR-1277	0	0						32.767						32.4792	0	0	0	0	0	0	0	32.767	0	0	0	0	0	32.4792								1.36816e-08						1.67029e-08	NaN	NaN	NaN	NaN	NaN	NaN	NaN
HSA-MIR-1278	0	0	30.7923	29.4782	31.2834	31.4484	30.2332		30.376	29.2434		31.0475		32.1785	0	0	-0.506822	0.807218	-0.997912	-1.16295	0.0522281	0	-0.0905119	1.04209	0	-0.762062	0	-1.89309				57.1483			96.4446			48.5624					NaN	4.963	NaN	NaN	NaN	0.4588	1.237
HSA-MIR-1282	0	0		33.0224	30.8838	34.8631			32.443			32.2821			0	0	0	33.0224	30.8838	34.8631	0	0	32.443	0	0	32.2821	0	0				1.14626e-08	5.04709e-08	3.19997e-09			1.71272e-08			1.91482e-08			NaN	NaN	NaN	NaN	NaN	2.565	NaN
HSA-MIR-1284	0	0	31.6417		30.7911	34.5544						31.8291			0	0	31.6417	0	30.7911	34.5544	0	0	0	0	0	31.8291	0	0			2.98473e-08		5.38214e-08	3.96348e-09						2.62115e-08			NaN	NaN	NaN	NaN	NaN	2.628	NaN
HSA-MIR-1285	0	33.2882	33.0897		30.1668	30.2316		32.0758	33.7139			32.0529	34.0789	33.3556	0	33.2882	33.0897	0	30.1668	30.2316	0	32.0758	33.7139	0	0	32.0529	34.0789	33.3556		9.53342e-09	1.09398e-08		8.29614e-08	7.93187e-08		2.20907e-08	7.09764e-09			2.24445e-08	5.51117e-09	9.09869e-09	NaN	NaN	0.1603	NaN	1.15	4.061	NaN
HSA-MIR-1287	0	30.7603	33.6638		31.869			31.5652				33.6309			0	30.7603	33.6638	0	31.869	0	0	31.5652	0	0	0	33.6309	0	0		5.49833e-08	7.34824e-09		2.54956e-08			3.14712e-08				7.51764e-09			NaN	NaN	NaN	NaN	5.223	0.9826	NaN
HSA-MIR-129-3P	0	34.9143		31.1575		32.0274		32.5289							0	34.9143	0	31.1575	0	32.0274	0	32.5289	0	0	0	0	0	0		3.08851e-09		4.17498e-08		2.28454e-08		1.6137e-08							NaN	NaN	NaN	NaN	0.4458	NaN	NaN
HSA-MIR-129-5P	0	0					31.7063								0	0	0	0	0	0	31.7063	0	0	0	0	0	0	0							2.85391e-08								NaN	NaN	NaN	NaN	0.3917	NaN	NaN
HSA-MIR-129*	0	34.6015										31.4112			0	34.6015	0	0	0	0	0	0	0	0	0	31.4112	0	0		3.83639e-09										3.50186e-08			NaN	NaN	NaN	NaN	NaN	NaN	1
HSA-MIR-1291	0	29.6591		30.2215	31.0403	29.9498	30.3429			30.4924	31.0978	30.443	30.6439	29.6426	0	-0.140499	0	-0.702849	-1.52164	-0.431209	-0.824279	0	0	-0.973779	-1.57916	-0.924359	-1.12523	-0.123959															NaN	1.849	0.3762	0.6884	3.087	0.4809	1.015
HSA-MIR-1294	0	0		32.3879	31.9259		34.2971								0	0	0	32.3879	31.9259	0	34.2971	0	0	0	0	0	0	0				1.77938e-08	2.45107e-08		4.73748e-09								NaN	NaN	NaN	NaN	NaN	1.366	0.3438
HSA-MIR-1299	0	0								32.2686		31.9676		33.8204	0	0	0	0	0	0	0	0	0	32.2686	0	31.9676	0	33.8204										1.93281e-08		2.38122e-08		6.59238e-09	NaN	2.244	NaN	NaN	NaN	NaN	NaN
HSA-MIR-1302	0	0	33.7197	33.2593			32.6653				32.2634		33.3227		0	0	-3.04788	-2.5875	0	0	-1.99347	0	0	0	-1.59161	0	-2.65088	0															NaN	NaN	0.3824	1.997	NaN	NaN	1.321
HSA-MIR-1304	0	0	33.1708				32.2427	31.0126	34.5047	31.0026		31.2985	32.9712		0	0	33.1708	0	0	0	32.2427	31.0126	34.5047	31.0026	0	31.2985	32.9712	0			1.03417e-08				1.96781e-08	4.61612e-08	4.1026e-09	4.64807e-08		3.78636e-08	1.18765e-08		NaN	4.579	0.2644	NaN	NaN	NaN	0.9599
HSA-MIR-1305	0	0		34.4039	31.1708									31.4379	0	0	0	34.4039	31.1708	0	0	0	0	0	0	0	0	31.4379				4.39944e-09	4.13673e-08									3.4376e-08	NaN	NaN	NaN	NaN	NaN	1.7	NaN
HSA-MIR-132*	0	31.77	31.6725		31.8022		30.1436	34.0002	30.4152	34.6144	30.5143	30.4963		31.2536	0	-2.31127	-2.21378	0	-2.34353	0	-0.68484	-4.54153	-0.9565	-5.15564	-1.05554	-1.03763	0	-1.79491															NaN	0.2203	NaN	2.14	1.483	0.5883	2.419
HSA-MIR-1321	0	31.6511	30.5916	30.4533	31.5221	31.5893	30.356	31.0036		30.5652	30.8445		32.6259	30.3007	0	31.6511	30.5916	30.4533	31.5221	31.5893	30.356	31.0036	0	30.5652	30.8445	0	32.6259	30.3007		2.96531e-08	6.18049e-08	6.80224e-08	3.24267e-08	3.09513e-08	7.27673e-08	4.64488e-08		6.29428e-08	5.18671e-08		1.50878e-08	7.56097e-08	NaN	2.892	0.1567	1.35	1.277	0.5665	1.656
HSA-MIR-1324	0	0													0	0	0	0	0	0	0	0	0	0	0	0	0	0															NaN	NaN	NaN	NaN	NaN	NaN	NaN
HSA-MIR-133B	0	29.4528	30.1195	29.9853	30.1268	30.878	30.2833	31.2914	32.458	29.7606	30.9929	29.5614	30.7196	29.5997	0	-0.614919	-1.28165	-1.14743	-1.28901	-2.0402	-1.44546	-2.45355	-3.62021	-0.922818	-2.1551	-0.723529	-1.88177	-0.761829															NaN	3.01	0.3499	0.7258	3.492	0.8879	1.037
HSA-MIR-134	0	0	29.9022												0	0	29.9022	0	0	0	0	0	0	0	0	0	0	0			9.96667e-08												NaN	NaN	NaN	NaN	NaN	NaN	NaN
HSA-MIR-135A	0	0	32.203			34.8494	33.7405		30.4852				32.6269		0	0	-2.77993	0	0	-5.42631	-4.31749	0	-1.06214	0	0	0	-3.20385	0															NaN	NaN	0.5874	NaN	NaN	NaN	0.5948
HSA-MIR-135B	0	0													0	0	0	0	0	0	0	0	0	0	0	0	0	0															NaN	NaN	NaN	NaN	NaN	NaN	NaN
HSA-MIR-135B*	0	0											31.9263	32.2169	0	0	0	0	0	0	0	0	0	0	0	0	31.9263	32.2169													2.45037e-08	2.00325e-08	NaN	NaN	0.8232	NaN	NaN	NaN	NaN
HSA-MIR-136	0	0			31.3437		31.8402	31.5318			31.9422		33.1985		0	0	0	0	31.3437	0	31.8402	31.5318	0	0	31.9422	0	33.1985	0					3.66962e-08		2.60108e-08	3.22092e-08			2.42348e-08		1.01454e-08		NaN	NaN	0.2455	1.47	NaN	1.494	1.379
HSA-MIR-137	0	0													0	0	0	0	0	0	0	0	0	0	0	0	0	0															NaN	NaN	NaN	NaN	NaN	NaN	NaN
HSA-MIR-138	0	32.5432			33.3473					33.6986		30.8843		34.7708	0	32.5432	0	0	33.3473	0	0	0	0	33.6986	0	30.8843	0	34.7708		1.59784e-08			9.15081e-09					7.17301e-09		5.04537e-08		3.41153e-09	NaN	1.07	NaN	NaN	2.233	0.5189	NaN
HSA-MIR-139-3P	0	30.5582		31.0017	32.6155	30.5392	31.1922	29.6701		30.4759	30.0154	30.4367	30.1833	31.8236	0	2.89727	0	2.45386	0.83997	2.91632	2.26328	3.78544	0	2.97963	3.44008	3.01883	3.27222	1.63191		13.4225		18.2522	55.8655	13.2465	20.8298	7.25219		12.6777	9.21367	12.3379	10.3506	32.2661	NaN	2.556	0.7075	1.992	2.262	0.2205	0.7703
HSA-MIR-139-5P	0	0	28.7612												0	0	28.7612	0	0	0	0	0	0	0	0	0	0	0			2.19788e-07												NaN	NaN	NaN	NaN	NaN	NaN	NaN
HSA-MIR-141	0	0	32.0936		30.1474	30.5742	32.1394	32.0518		32.3741	31.6008	30.1571	30.6244	31.326	0	0	32.0936	0	30.1474	30.5742	32.1394	32.0518	0	32.3741	31.6008	30.1571	30.6244	31.326			2.18211e-08		8.40846e-08	6.25544e-08	2.11386e-08	2.24618e-08		1.79645e-08	3.0706e-08	8.3524e-08	6.04135e-08	3.71471e-08	NaN	1.108	0.8422	1.073	NaN	1.972	0.6457
HSA-MIR-141*	0	30.6673								34.2191		34.7408			0	30.6673	0	0	0	0	0	0	0	34.2191	0	34.7408	0	0		5.86429e-08								5.00073e-09		3.48324e-09			NaN	0.6324	NaN	NaN	6.949	NaN	NaN
HSA-MIR-145*	0	32.9763	33.6452	31.1927		31.586					31.1542			34.501	0	32.9763	33.6452	31.1927	0	31.586	0	0	0	0	31.1542	0	0	34.501		1.18347e-08	7.44375e-09	4.07449e-08		3.1022e-08					4.1846e-08			4.11299e-09	NaN	NaN	NaN	2.785	1.303	NaN	NaN
HSA-MIR-1469	0	27.7492	26.5857	27.0764	27.3323	26.4081			29.1958	26.9892	26.8045	27.0642	26.4655		0	2.29444	3.45791	2.9672	2.71136	3.6355	0	0	0.847804	3.05442	3.23912	2.9794	3.57816	0		20.3847	9.10048	12.7874	15.2686	8.04645			55.563	12.0372	10.5907	12.6797	8.3727		NaN	2.062	0.6698	1.327	1.141	0.618	NaN
HSA-MIR-147B	0	34.0148	31.6195		33.5918					31.5736			33.7076		0	-3.39246	-0.997115	0	-2.96944	0	0	0	0	-0.951225	0	0	-3.08529	0															NaN	4.71	0.2425	NaN	0.8127	0.4421	NaN
HSA-MIR-148A*	0	32.2718	32.7433			29.9754		33.7823		32.3837	33.2829		31.6186	32.026	0	32.2718	32.7433	0	0	29.9754	0	33.7823	0	32.3837	33.2829	0	31.6186	32.026		1.92846e-08	1.39088e-08			9.47313e-08		6.76884e-09		1.78456e-08	9.56848e-09		3.03295e-08	2.28675e-08	NaN	1.98	0.7603	0.6012	2.005	NaN	NaN
HSA-MIR-148B*	0	0			33.1033		30.8964		34.6765	34.0219	31.2578	34.8071	30.6243	32.9136	0	0	0	0	33.1033	0	30.8964	0	34.6765	34.0219	31.2578	34.8071	30.6243	32.9136					1.08368e-08		5.0032e-08		3.64192e-09	5.73288e-09	3.89453e-08	3.32667e-09	6.04164e-08	1.23598e-08	NaN	0.809	1.926	3.113	NaN	0.5814	3.495
HSA-MIR-150*	0	31.8941	28.4691	29.9093	29.2093	29.2897	30.169	29.3592	31.0187	29.6687	30.9559		29.472	29.7923	0	1.19347	4.6185	3.17833	3.87833	3.79787	2.91862	3.72835	2.06891	3.41885	2.13172	0	3.61559	3.29526		43.7251	4.07091	11.0465	6.79994	7.18995	13.2253	7.5449	23.8339	9.35023	22.8185		8.15826	10.1865	NaN	2.318	0.6004	0.5381	0.4645	1.212	0.8115
HSA-MIR-1537	0	34.1573	33.6706		30.3517	29.7781	34.7995	31.2357			30.7855	31.6249	31.712	30.4586	0	34.1573	33.6706	0	30.3517	29.7781	34.7995	31.2357	0	0	30.7855	31.6249	31.712	30.4586		5.21964e-09	7.31389e-09		7.2985e-08	1.0862e-07	3.34436e-09	3.95463e-08			5.40304e-08	3.01954e-08	2.84276e-08	6.77721e-08	NaN	NaN	0.5834	2.78	0.4442	2.52	0.1504
HSA-MIR-1538	0	30.857	28.0026	33.6588	31.5127	29.9479	31.0192	30.4391	31.2933	29.3794		30.6562	30.7054	30.5448	0	30.857	28.0026	33.6588	31.5127	29.9479	31.0192	30.4391	31.2933	29.3794	0	30.6562	30.7054	30.5448		5.14182e-08	3.71856e-07	7.37365e-09	3.2638e-08	9.65563e-08	4.59496e-08	6.86962e-08	3.79987e-08	1.43196e-07		5.90989e-08	5.71162e-08	6.38396e-08	NaN	4.749	0.428	NaN	1.598	0.4115	0.7545
HSA-MIR-154*	0	32.9353								32.2567	31.0451		31.3115		0	32.9353	0	0	0	0	0	0	0	32.2567	31.0451	0	31.3115	0		1.21751e-08								1.94873e-08	4.51329e-08		3.75242e-08		NaN	1.315	0.5723	1.725	0.77	NaN	NaN
HSA-MIR-155	0	0	34.8924	31.4909	31.6535	30.2664	31.2704	31.2204	31.1209		31.7095	31.0018	32.0122	30.9477	0	0	34.8924	31.4909	31.6535	30.2664	31.2704	31.2204	31.1209	0	31.7095	31.0018	32.0122	30.9477			3.13568e-09	3.31358e-08	2.96029e-08	7.74315e-08	3.86083e-08	3.99695e-08	4.2824e-08		2.84777e-08	4.65097e-08	2.30872e-08	4.82859e-08	NaN	NaN	0.3667	1.134	NaN	0.7912	1.344
HSA-MIR-155*	0	32.3449	31.9604	30.3573		32.1442	30.632		31.8302	31.3056	30.7189		31.5402	30.155	0	-0.219003	0.165437	1.76855	0	-0.0183526	1.49385	0	0.295677	0.820257	1.40701	0	0.585657	1.97084			89.1658	29.3504			35.5064		81.469	56.6341	37.7093		66.6346	25.5105	NaN	1.809	0.3475	1.539	0.8249	NaN	1.429
HSA-MIR-15A*	0	31.0033	29.638	31.1041	29.9461	30.6946	30.7719	29.852		28.7478	33.2492	29.9045	29.9699	30.7013	0	-1.21953	0.145765	-1.32034	-0.162365	-0.910825	-0.988135	-0.0683147	0	1.03589	-3.46542	-0.120735	-0.186135	-0.917605			90.39							48.7717					NaN	6.778	0.6566	0.1695	1.33	1.123	0.8251
HSA-MIR-181A*	0	0				30.1684		30.0483		33.6655	31.8329		33.0247	34.4509	0	0	0	0	0	30.1684	0	30.0483	0	33.6655	31.8329	0	33.0247	34.4509						8.28689e-08		9.00678e-08		7.33969e-09	2.61422e-08		1.1444e-08	4.25848e-09	0.7864	10.13	0.9057	0.7647	NaN	NaN	2.537
HSA-MIR-181C*	0	0	29.9062		32.9537	31.4612	31.667	34.4099						33.6449	0	0	29.9062	0	32.9537	31.4612	31.667	34.4099	0	0	0	0	0	33.6449			9.93907e-08		1.20212e-08	3.38248e-08	2.9327e-08	4.38127e-09						7.44524e-09	NaN	NaN	NaN	NaN	NaN	0.6422	2.04
HSA-MIR-183*	0	34.758			29.8424		30.6527	32.1035							0	34.758	0	0	29.8424	0	30.6527	32.1035	0	0	0	0	0	0		3.44197e-09			1.03885e-07		5.92416e-08	2.16711e-08							NaN	NaN	NaN	NaN	0.2419	2.963	2.2
HSA-MIR-184	0	0		30.3501		34.4606		30.4739			29.8169		30.6126	32.3272	0	0	0	30.3501	0	34.4606	0	30.4739	0	0	29.8169	0	30.6126	32.3272				7.3064e-08		4.22989e-09		6.70544e-08			1.05736e-07		6.09109e-08	1.85581e-08	NaN	NaN	0.9606	4.18	NaN	NaN	NaN
HSA-MIR-186*	0	0						31.3447				32.4865			0	0	0	0	0	0	0	31.3447	0	0	0	32.4865	0	0								3.6669e-08				1.66185e-08			NaN	NaN	NaN	NaN	NaN	NaN	NaN
HSA-MIR-188-3P	0	0	30.6634	30.9251			31.6415	29.7647	30.6363	30.8348	31.0338	30.6832		30.6074	0	0	-4.08443	-4.34614	0	0	-5.06256	-3.18569	-4.05735	-4.25585	-4.45481	-4.10424	0	-4.02845															NaN	1.553	NaN	0.7665	NaN	NaN	0.4397
HSA-MIR-18A*	0	30.1596	31.2561		33.7172	30.4232	29.7644	30.1209	32.4869	31.2327	31.2218	31.1569	30.039	29.9294	0	30.1596	31.2561	0	33.7172	30.4232	29.7644	30.1209	32.4869	31.2327	31.2218	31.1569	30.039	29.9294		8.33783e-08	3.89926e-08		7.08132e-09	6.9457e-08	1.09656e-07	8.56481e-08	1.66133e-08	3.96297e-08	3.99313e-08	4.17684e-08	9.06509e-08	9.78038e-08	NaN	1.658	0.8569	0.9461	3.268	0.1126	2.271
HSA-MIR-18B*	0	31.2391		30.8267		34.7287			32.7774	31.6007	30.655	34.4292	29.7257		0	31.2391	0	30.8267	0	34.7287	0	0	32.7774	31.6007	30.655	34.4292	29.7257	0		3.94531e-08		5.251e-08		3.51258e-09			1.35838e-08	3.07079e-08	5.91448e-08	4.32284e-09	1.12639e-07		NaN	2.285	1.894	2.493	2.751	NaN	NaN
HSA-MIR-1914	0	29.703	30.6457		31.5096		33.5983	32.0472	30.3934	29.3354			31.3393		0	29.703	30.6457	0	31.5096	0	33.5983	32.0472	30.3934	29.3354	0	0	31.3393	0		1.1442e-07	5.95277e-08		3.27091e-08		7.68955e-09	2.25336e-08	7.09052e-08	1.4763e-07			3.68068e-08		NaN	5.962	0.3359	NaN	4.33	0.5022	0.1538
HSA-MIR-193B	0	30.5722	27.1285		30.1815	30.4208	30.938	29.7475		27.6988	28.8094	31.6883	32.2083	30.0856	0	-0.776105	2.66761	0	-0.38539	-0.62469	-1.14193	0.04861	0	2.09734	0.98667	-1.89222	-2.41225	-0.2895			15.7387					96.6867		23.3689	50.4641				NaN	10.31	0.1023	2.704	1.318	0.7011	0.5405
HSA-MIR-193B*	0	0			32.3168										0	0	0	0	32.3168	0	0	0	0	0	0	0	0	0					1.86928e-08										NaN	NaN	NaN	NaN	NaN	1	NaN
HSA-MIR-196B*	0	32.9291		31.1047	31.9501	30.9336		30.7207					31.5922	32.3068	0	32.9291	0	31.1047	31.9501	30.9336	0	30.7207	0	0	0	0	31.5922	32.3068		1.22276e-08		4.33076e-08	2.41025e-08	4.87608e-08		5.65125e-08					3.0889e-08	1.88224e-08	NaN	NaN	0.5631	NaN	0.9244	0.7393	NaN
HSA-MIR-198	0	0												34.9566	0	0	0	0	0	0	0	0	0	0	0	0	0	34.9566														2.9992e-09	NaN	NaN	NaN	NaN	NaN	NaN	NaN
HSA-MIR-19A*	0	0	31.2187	31.1113		32.1498		31.6797	31.5132	30.3156	32.8782	31.9964	34.1684		0	0	-1.53193	-1.42458	0	-2.46306	0	-1.99303	-1.82647	-0.628864	-3.19144	-2.30965	-4.48168	0															NaN	5.754	0.08999	0.5517	NaN	NaN	NaN
HSA-MIR-19B-1*	0	0			33.6178	34.1683					30.9963	30.1078	30.6175	32.2228	0	0	0	0	33.6178	34.1683	0	0	0	0	30.9963	30.1078	30.6175	32.2228					7.58658e-09	5.17988e-09					4.66847e-08	8.64269e-08	6.07023e-08	1.99518e-08	NaN	NaN	1.589	3.063	NaN	0.3341	NaN
HSA-MIR-19B-2*	0	0						30.7676				32.2946			0	0	0	0	0	0	0	30.7676	0	0	0	32.2946	0	0								5.47065e-08				1.8983e-08			NaN	NaN	NaN	NaN	NaN	NaN	NaN
HSA-MIR-200A	0	0	32.5302			31.4058					33.0243		32.9902	29.1848	0	0	32.5302	0	0	31.4058	0	0	0	0	33.0243	0	32.9902	29.1848			1.61224e-08			3.51494e-08					1.14475e-08		1.17211e-08	1.63869e-07	NaN	NaN	0.2821	0.6906	NaN	NaN	NaN
HSA-MIR-200B	0	31.1776	30.7935		31.8071	31.597	31.3069	34.51		30.4182	30.1783		32.4896	29.3084	0	-0.468927	-0.0848242	0	-1.09839	-0.888364	-0.598234	-3.8013	0	0.290496	0.530406	0	-1.78098	1.40023										81.7621	69.236			37.887	NaN	4.194	0.2255	2.805	2.321	0.6088	1.121
HSA-MIR-200B*	0	34.2192			34.3517		30.5892	30.6471	34.309	31.1784	30.4131	33.9317	30.8902	28.7153	0	34.2192	0	0	34.3517	0	30.5892	30.6471	34.309	31.1784	30.4131	33.9317	30.8902	28.7153		5.0002e-09			4.5616e-09		6.19069e-08	5.94695e-08	4.69837e-09	4.11491e-08	6.99445e-08	6.10279e-09	5.02489e-08	2.26907e-07	NaN	3.104	0.8564	2.988	0.3534	0.1308	2.312
HSA-MIR-200C*	0	31.4212	31.6616		34.732	32.732		31.5314	29.4841	31.9836	32.3321	30.5874	32.0705	33.073	0	-1.90787	-2.14829	0	-5.21871	-3.21873	0	-2.01807	0.0292333	-2.47029	-2.8188	-1.0741	-2.5572	-3.55968									97.9941						NaN	1.976	0.4205	0.8792	2.735	0.1118	NaN
HSA-MIR-202	0	30.42						33.0058	31.5191				31.9966	34.5603	0	30.42	0	0	0	0	0	33.0058	31.5191	0	0	0	31.9966	34.5603		6.96118e-08						1.15946e-08	3.24942e-08				2.33378e-08	3.94747e-09	NaN	NaN	0.5349	NaN	6.616	NaN	NaN
HSA-MIR-203	0	0	30.1749		30.9611										0	0	30.1749	0	30.9611	0	0	0	0	0	0	0	0	0			8.24998e-08		4.78375e-08										NaN	NaN	NaN	NaN	NaN	0.6425	NaN
HSA-MIR-204	0	0	31.303		32.5049		31.2556	29.8875	31.1225			34.4079		31.7376	0	0	31.303	0	32.5049	0	31.2556	29.8875	31.1225	0	0	34.4079	0	31.7376			3.77451e-08		1.64076e-08		3.90051e-08	1.00687e-07	4.27748e-08			4.38717e-09		2.7927e-08	NaN	NaN	NaN	NaN	NaN	0.4371	1.353
HSA-MIR-205	0	32.0912	28.5306		34.1689	29.5416	31.0367	33.107	31.0525	29.5275	31.8119	30.2576	34.3927	31.5184	0	32.0912	28.5306	0	34.1689	29.5416	31.0367	33.107	31.0525	29.5275	31.8119	30.2576	34.3927	31.5184		2.18568e-08	2.57891e-07		5.17769e-09	1.27968e-07	4.53974e-08	1.08094e-08	4.49023e-08	1.29227e-07	2.65248e-08	7.79037e-08	4.43369e-09	3.25097e-08	NaN	7.44	0.05768	0.8649	1.179	0.1133	1.294
HSA-MIR-21*	0	30.7865			32.0588	30.7619	34.5758	31.0699			31.2685	31.555	30.968	31.3933	0	30.7865	0	0	32.0588	30.7619	34.5758	31.0699	0	0	31.2685	31.555	30.968	31.3933		5.39951e-08			2.23535e-08	5.49215e-08	3.90529e-09	4.43637e-08			3.86592e-08	3.16953e-08	4.76102e-08	3.54548e-08	NaN	NaN	0.8401	1.71	3.951	0.6637	0.151
HSA-MIR-2115*	0	31.665				31.2595		33.749			34.7318	30.6834			0	31.665	0	0	0	31.2595	0	33.749	0	0	34.7318	30.6834	0	0		2.93682e-08				3.88992e-08		6.9269e-09			3.50494e-09	5.79939e-08			NaN	NaN	NaN	0.2433	3.373	NaN	NaN
HSA-MIR-214*	0	0	32.0409		30.5041	34.1913		30.5685						28.7002	0	0	32.0409	0	30.5041	34.1913	0	30.5685	0	0	0	0	0	28.7002			2.26318e-08		6.5668e-08	5.09789e-09		6.27994e-08						2.29284e-07	NaN	NaN	NaN	NaN	NaN	1.673	NaN
HSA-MIR-215	0	0	30.0471	30.2397		31.2806	30.5867	31.4731							0	0	30.0471	30.2397	0	31.2806	30.5867	31.4731	0	0	0	0	0	0			9.01377e-08	7.88752e-08		3.8335e-08	6.20134e-08	3.35462e-08							NaN	NaN	NaN	NaN	NaN	NaN	1.222
HSA-MIR-217	0	32.8981	31.3986	33.4403			34.4987	31.3906	34.413	34.0194		34.0374		34.64	0	1.29091	2.79037	0.74867	0	0	-0.30967	2.79845	-0.224	0.16965	0	0.15159	0	-0.45098		40.8693	14.4549	59.5152				14.3742		88.9058		90.0258			NaN	1.022	NaN	NaN	2.082	NaN	0.3628
HSA-MIR-218-2*	0	0			30.1258										0	0	0	0	-0.907387	0	0	0	0	0	0	0	0	0															NaN	NaN	NaN	NaN	NaN	1	NaN
HSA-MIR-219-1-3P	0	0										31.1375		30.0606	0	0	0	0	0	0	0	0	0	0	0	31.1375	0	30.0606												4.23332e-08		8.93019e-08	NaN	NaN	NaN	NaN	NaN	NaN	NaN
HSA-MIR-219-5P	0	32.2683	31.6297		30.4235	32.8111	33.8714	34.212							0	32.2683	31.6297	0	30.4235	32.8111	33.8714	34.212	0	0	0	0	0	0		1.93321e-08	3.00958e-08		6.94383e-08	1.32697e-08	6.36358e-09	5.0253e-09							NaN	NaN	NaN	NaN	2.538	3.698	0.4414
HSA-MIR-221*	0	0			32.2782	32.427								32.3484	0	0	0	0	32.2782	32.427	0	0	0	0	0	0	0	32.3484					1.91991e-08	1.73179e-08								1.82879e-08	NaN	NaN	NaN	NaN	NaN	1.252	NaN
HSA-MIR-222*	0	32.8599	33.7305	31.5623			32.7146							31.8087	0	32.8599	33.7305	31.5623	0	0	32.7146	0	0	0	0	0	0	31.8087		1.28291e-08	7.01634e-09	3.15365e-08			1.41878e-08							2.65837e-08	NaN	NaN	NaN	NaN	1.232	NaN	0.7201
HSA-MIR-224	0	30.3913	32.6624		30.2428						30.4795		32.909		0	30.3913	32.6624	0	30.2428	0	0	0	0	0	30.4795	0	32.909	0		7.10076e-08	1.47113e-08		7.87075e-08						6.6796e-08		1.23997e-08		NaN	NaN	0.1598	2.158	3.794	1.706	NaN
HSA-MIR-23B*	0	0						31.2358							0	0	0	0	0	0	0	31.2358	0	0	0	0	0	0								3.95452e-08							NaN	NaN	NaN	NaN	NaN	NaN	NaN
HSA-MIR-24-1*	0	0	33.0377						31.991		32.3866				0	0	33.0377	0	0	0	0	0	31.991	0	32.3866	0	0	0			1.13412e-08						2.34281e-08		1.78099e-08				NaN	NaN	NaN	0.8557	NaN	NaN	NaN
HSA-MIR-25*	0	0	32.8599	31.3193	32.7003	30.3111	31.2675	30.4292	33.9644	29.7084	33.383	34.6931	31.2833		0	0	32.8599	31.3193	32.7003	30.3111	31.2675	30.4292	33.9644	29.7084	33.383	34.6931	31.2833	0			1.28283e-08	3.73198e-08	1.43296e-08	7.50671e-08	3.86865e-08	6.91659e-08	5.96602e-09	1.1399e-07	8.92746e-09	3.60033e-09	3.82628e-08		NaN	9.705	0.7361	0.4305	NaN	0.4638	1.631
HSA-MIR-26A-1*	0	0						30.461							0	0	0	0	0	0	0	30.461	0	0	0	0	0	0								6.76594e-08							NaN	NaN	NaN	NaN	NaN	NaN	NaN
HSA-MIR-26A-2*	0	0	33.6666					32.0802					34.0276		0	0	-2.15266	0	0	0	0	-0.566301	0	0	0	0	-2.51364	0															NaN	NaN	0.3672	NaN	NaN	NaN	NaN
HSA-MIR-28-3P	0	28.5764	28.5331		29.0054	28.7694	30.3625	31.4294		29.9167	33.9373	29.7562	30.7253	30.2235	0	5.36392	5.40728	0	4.93499	5.17092	3.57784	2.51098	0	4.02361	0.0030634	4.18414	3.21506	3.71683		2.42829	2.35638		3.26903	2.77586	8.37456	17.5436		6.14854	99.7879	5.50107	10.7689	7.60539	NaN	2.475	0.3193	0.08638	5.872	1.77	0.8997
HSA-MIR-2909	0	0													0	0	0	0	0	0	0	0	0	0	0	0	0	0															NaN	NaN	NaN	NaN	NaN	NaN	NaN
HSA-MIR-297	0	0									31.3152				0	0	0	0	0	0	0	0	0	0	31.3152	0	0	0											3.74257e-08				NaN	NaN	NaN	1	NaN	NaN	NaN
HSA-MIR-298	0	0								31.2929			31.9472	30.6872	0	0	0	0	0	0	0	0	0	-1.73927	0	0	-2.39353	-1.13352															NaN	2.239	0.3215	NaN	NaN	NaN	NaN
HSA-MIR-29A*	0	32.2337	31.9502		31.8682	30.3489	32.1702	34.236		29.8911	31.0365	32.4173		30.4356	0	32.2337	31.9502	0	31.8682	30.3489	32.1702	34.236	0	29.8911	31.0365	32.4173	0	30.4356		1.98008e-08	2.41001e-08		2.55094e-08	7.31233e-08	2.06927e-08	4.94239e-09		1.00433e-07	4.5404e-08	1.74353e-08		6.88626e-08	NaN	6.85	NaN	1.754	1.265	0.6615	0.6988
HSA-MIR-29C*	0	31.0984	30.0631		31.6784	29.1157	30.1758	30.1512		29.9388	30.117	32.769	31.4398		0	31.0984	30.0631	0	31.6784	29.1157	30.1758	30.1512	0	29.9388	30.117	32.769	31.4398	0		4.34962e-08	8.91498e-08		2.90966e-08	1.71912e-07	8.24484e-08	8.38674e-08		9.71693e-08	8.58781e-08	1.36627e-08	3.43307e-08		NaN	3.505	0.2799	1.755	1.47	0.3991	1.473
HSA-MIR-301B	0	0			30.5787	34.2341		30.902					33.0551		0	0	0	0	30.5787	34.2341	0	30.902	0	0	0	0	33.0551	0					6.23578e-08	4.94873e-09		4.98406e-08					1.12053e-08		NaN	NaN	0.429	NaN	NaN	4.017	NaN
HSA-MIR-302A*	0	0												32.2771	0	0	0	0	0	0	0	0	0	0	0	0	0	32.2771														1.92146e-08	NaN	NaN	NaN	NaN	NaN	NaN	NaN
HSA-MIR-302B*	0	0													0	0	0	0	0	0	0	0	0	0	0	0	0	0															NaN	NaN	NaN	NaN	NaN	NaN	NaN
HSA-MIR-302C	0	33.1689					32.7767	34.801							0	-0.718899	0	0	0	0	-0.326714	-2.35096	0	0	0	0	0	0															NaN	NaN	NaN	NaN	2.206	NaN	1.53
HSA-MIR-302C*	0	0	31.8907						31.9388	31.8454					0	0	31.8907	0	0	0	0	0	31.9388	31.8454	0	0	0	0			2.51161e-08						2.4292e-08	2.59158e-08					NaN	1.217	NaN	NaN	NaN	NaN	NaN
HSA-MIR-30B*	0	0	33.3942	30.7041											0	0	33.3942	30.7041	0	0	0	0	0	0	0	0	0	0			8.85811e-09	5.71673e-08											NaN	NaN	NaN	NaN	NaN	NaN	NaN
HSA-MIR-30C-1*	0	31.9535			33.1013		30.6901	31.6183	34.1833	32.7532	31.2833	32.2486			0	31.9535	0	0	33.1013	0	30.6901	31.6183	34.1833	32.7532	31.2833	32.2486	0	0		2.40463e-08			1.08522e-08		5.7726e-08	3.03347e-08	5.12616e-09	1.38136e-08	3.82649e-08	1.95977e-08			NaN	1.114	NaN	1.748	1.817	0.3327	2.305
HSA-MIR-30C-2*	0	0			32.1624		34.9685			34.1655	31.353		30.605		0	0	0	0	-2.87174	0	-5.67785	0	0	-4.87487	-2.06235	0	-1.31434	0															NaN	0.7374	1.966	2.934	NaN	1.124	0.2092
HSA-MIR-3116	0	0								33.0341			31.7401		0	0	0	0	0	0	0	0	0	33.0341	0	0	31.7401	0										1.137e-08			2.78794e-08		NaN	1.343	0.7444	NaN	NaN	NaN	NaN
HSA-MIR-3117	0	0	32.9016									34.8199			0	0	32.9016	0	0	0	0	0	0	0	0	34.8199	0	0			1.24634e-08									3.29747e-09			NaN	NaN	NaN	NaN	NaN	NaN	NaN
HSA-MIR-3118	0	0		33.9515											0	0	0	33.9515	0	0	0	0	0	0	0	0	0	0				6.01965e-09											NaN	NaN	NaN	NaN	NaN	NaN	NaN
HSA-MIR-3120	0	29.8672	31.1223	30.2613	30.4755	30.6283		28.9997		31.9234	28.8894	30.1961	31.2796	31.8016	0	-0.688728	-1.94383	-1.08281	-1.29706	-1.44982	0	0.178785	0	-2.74494	0.289095	-1.01768	-2.10112	-2.62317								88.3446			81.8415				NaN	0.7672	0.2709	3.56	2.99	0.7957	NaN
HSA-MIR-3124	0	0	33.7252					32.4686					31.3831	33.6525	0	0	33.7252	0	0	0	0	32.4686	0	0	0	0	31.3831	33.6525			7.04192e-09					1.68256e-08					3.57076e-08	7.40607e-09	NaN	NaN	1.629	NaN	NaN	NaN	NaN
HSA-MIR-3128	0	0													0	0	0	0	0	0	0	0	0	0	0	0	0	0															NaN	NaN	NaN	NaN	NaN	NaN	NaN
HSA-MIR-3129	0	0													0	0	0	0	0	0	0	0	0	0	0	0	0	0															NaN	NaN	NaN	NaN	NaN	NaN	NaN
HSA-MIR-3133	0	0													0	0	0	0	0	0	0	0	0	0	0	0	0	0															NaN	NaN	NaN	NaN	NaN	NaN	NaN
HSA-MIR-3135	0	34.819	32.4143	32.8071		31.686	34.5754				33.4663			31.8913	0	34.819	32.4143	32.8071	0	31.686	34.5754	0	0	0	33.4663	0	0	31.8913		3.29939e-09	1.74709e-08	1.33066e-08		2.89437e-08	3.90618e-09				8.42642e-09			2.51056e-08	NaN	NaN	NaN	0.8472	0.5487	NaN	0.3433
HSA-MIR-3136	0	0				34.1365			34.0726	34.3669	33.2073				0	0	0	0	0	34.1365	0	0	34.0726	34.3669	33.2073	0	0	0						5.29529e-09			5.53525e-09	4.51357e-09	1.00831e-08				NaN	1.229	NaN	1.556	NaN	NaN	NaN
HSA-MIR-3140	0	0			32.7751		29.1129								0	0	0	0	32.7751	0	29.1129	0	0	0	0	0	0	0					1.36049e-08		1.72249e-07								NaN	NaN	NaN	NaN	NaN	0.2463	4.061
HSA-MIR-3143	0	0	33.3351	31.5895	32.6172	30.8813	31.6489	30.6947				32.9851			0	0	-3.22091	-1.47524	-2.50302	-0.767066	-1.53465	-0.580526	0	0	0	-2.87085	0	0															NaN	NaN	NaN	NaN	NaN	0.543	1.384
HSA-MIR-3144-3P	0	0	30.7252			29.9543		30.1548		29.6133	31.191	34.3835	29.9042		0	0	-0.76216	0	0	0.00874	0	-0.19175	0	0.34975	-1.22803	-4.42052	0.05878	0						99.396				78.472			96.0076		NaN	5.419	1.001	1.028	NaN	NaN	NaN
HSA-MIR-3145	0	0						33.2344					32.6929	34.2373	0	0	0	0	0	0	0	33.2344	0	0	0	0	32.6929	34.2373								9.89548e-09					1.44034e-08	4.93808e-09	NaN	NaN	1.109	NaN	NaN	NaN	NaN
HSA-MIR-3146	0	0													0	0	0	0	0	0	0	0	0	0	0	0	0	0															NaN	NaN	NaN	NaN	NaN	NaN	NaN
HSA-MIR-3147	0	30.582			34.9559		31.5433	32.3346	32.7975	31.2901	33.9935			30.4271	0	-1.61053	0	0	-5.98437	0	-2.57177	-3.3631	-3.82598	-2.31857	-5.02204	0	0	-1.45557															NaN	3.189	NaN	0.2773	4.881	0.09552	1.325
HSA-MIR-3148	0	0													0	0	0	0	0	0	0	0	0	0	0	0	0	0															NaN	NaN	NaN	NaN	NaN	NaN	NaN
HSA-MIR-3149	0	0													0	0	0	0	0	0	0	0	0	0	0	0	0	0															NaN	NaN	NaN	NaN	NaN	NaN	NaN
HSA-MIR-3152	0	0													0	0	0	0	0	0	0	0	0	0	0	0	0	0															NaN	NaN	NaN	NaN	NaN	NaN	NaN
HSA-MIR-3153	0	31.2582		32.2407		31.5417	32.1359	32.6394					32.9631		0	31.2582	0	32.2407	0	31.5417	32.1359	32.6394	0	0	0	0	32.9631	0		3.89346e-08		1.97057e-08		3.19889e-08	2.11898e-08	1.49478e-08					1.19429e-08		NaN	NaN	0.2899	NaN	3.918	NaN	1.127
HSA-MIR-3156	0	0	32.7379	31.0337	31.7714	32.5981				34.4531		33.5022	31.234		0	0	32.7379	31.0337	31.7714	32.5981	0	0	0	34.4531	0	33.5022	31.234	0			1.39604e-08	4.54913e-08	2.72813e-08	1.53818e-08				4.25196e-09		8.21938e-09	3.95948e-08		NaN	0.5576	1.173	NaN	NaN	1.36	NaN
HSA-MIR-3158	0	31.3224	31.2452				32.5912			31.9876	31.1171	33.9973	29.4888		0	31.3224	31.2452	0	0	0	32.5912	0	0	31.9876	31.1171	33.9973	29.4888	0		3.72411e-08	3.92889e-08				1.54551e-08			2.34839e-08	4.29346e-08	5.83183e-09	1.32733e-07		NaN	1.452	1.855	1.504	2.158	NaN	0.4732
HSA-MIR-3160	0	0	34.9091												0	0	34.9091	0	0	0	0	0	0	0	0	0	0	0			3.0997e-09												NaN	NaN	NaN	NaN	NaN	NaN	NaN
HSA-MIR-3162	0	0		28.9385		31.7154	34.7027	34.1609					31.7748	31.3794	0	0	0	2.8301	0	0.0532253	-2.9341	-2.39227	0	0	0	0	-0.0061447	0.389255				14.0623		96.3779								76.3524	NaN	NaN	0.7494	NaN	NaN	NaN	0.2158
HSA-MIR-3163	0	0	33.5752			30.0642	30.4209						29.8741	31.7093	0	0	33.5752	0	0	30.0642	30.4209	0	0	0	0	0	29.8741	31.7093			7.81355e-09			8.90775e-08	6.95645e-08						1.01628e-07	2.84804e-08	NaN	NaN	1.548	NaN	NaN	NaN	2.322
HSA-MIR-3164	0	0					31.5219								0	0	0	0	0	0	31.5219	0	0	0	0	0	0	0							3.24316e-08								NaN	NaN	NaN	NaN	NaN	NaN	1
HSA-MIR-3165	0	0	34.9477										31.3674		0	0	34.9477	0	0	0	0	0	0	0	0	0	31.3674	0			3.01793e-09										3.60978e-08		NaN	NaN	2.25	NaN	NaN	NaN	NaN
HSA-MIR-3166	0	30.2781			31.4216	32.5355	32.147	32.6846					31.0901	30.6058	0	-1.4536	0	0	-2.59707	-3.71094	-3.32251	-3.86005	0	0	0	0	-2.26559	-1.78123															NaN	NaN	0.7934	NaN	5.776	1.061	0.8356
HSA-MIR-3167	0	0													0	0	0	0	0	0	0	0	0	0	0	0	0	0															NaN	NaN	NaN	NaN	NaN	NaN	NaN
HSA-MIR-3168	0	31.9755					30.3086								0	31.9755	0	0	0	0	30.3086	0	0	0	0	0	0	0		2.36821e-08					7.51963e-08								NaN	NaN	NaN	NaN	0.772	NaN	1.295
HSA-MIR-3171	0	0													0	0	0	0	0	0	0	0	0	0	0	0	0	0															NaN	NaN	NaN	NaN	NaN	NaN	NaN
HSA-MIR-3173	0	0													0	0	0	0	0	0	0	0	0	0	0	0	0	0															NaN	NaN	NaN	NaN	NaN	NaN	NaN
HSA-MIR-3175	0	31.512		30.4352	28.6738	26.8902	30.3482	30.2236	32.3632	31.1913	29.2632	31.8186	28.6185	29.2354	0	31.512	0	30.4352	28.6738	26.8902	30.3482	30.2236	32.3632	31.1913	29.2632	31.8186	28.6185	29.2354		3.26554e-08		6.88788e-08	2.33524e-07	8.0396e-07	7.31628e-08	7.97609e-08	1.81014e-08	4.07839e-08	1.55202e-07	2.64019e-08	2.42653e-07	1.58227e-07	NaN	0.8756	1.177	1.887	0.6569	1.906	0.7777
HSA-MIR-3177	0	0		30.9659	34.1327					31.9344		31.8903	29.3463	32.8582	0	0	0	30.9659	34.1327	0	0	0	0	31.9344	0	31.8903	29.3463	32.8582				4.76792e-08	5.30918e-09					2.43657e-08		2.51227e-08	1.46511e-07	1.28436e-08	NaN	1.91	2.595	NaN	NaN	0.1582	NaN
HSA-MIR-3179	0	0			31.058										0	0	0	0	31.058	0	0	0	0	0	0	0	0	0					4.47303e-08										NaN	NaN	NaN	NaN	NaN	1	NaN
HSA-MIR-3180	0	0	33.3817												0	0	0.16397	0	0	0	0	0	0	0	0	0	0	0			89.2566												NaN	NaN	NaN	NaN	NaN	NaN	NaN
HSA-MIR-3180-5P	0	30.1468	29.963	31.4146			30.4183		30.5541	30.0437		29.9198		30.5919	0	30.1468	29.963	31.4146	0	0	30.4183	0	30.5541	30.0437	0	29.9198	0	30.5919		8.41238e-08	9.5553e-08	3.49362e-08			6.969e-08		6.34298e-08	9.0356e-08		9.84548e-08		6.17925e-08	NaN	1.844	NaN	NaN	1.608	NaN	0.704
HSA-MIR-3182	0	0	34.8517	34.7348											0	0	34.8517	34.7348	0	0	0	0	0	0	0	0	0	0			3.22554e-09	3.49761e-09											NaN	NaN	NaN	NaN	NaN	NaN	NaN
HSA-MIR-3183	0	32.7555	33.9622			30.5922		28.7716		29.8327		31.3723	30.6483	29.9114	0	32.7555	33.9622	0	0	30.5922	0	28.7716	0	29.8327	0	31.3723	30.6483	29.9114		1.37916e-08	5.97508e-09			6.17758e-08		2.18217e-07		1.04584e-07		3.59757e-08	5.94209e-08	9.90331e-08	NaN	4.834	0.6206	NaN	0.5973	NaN	NaN
HSA-MIR-3185	0	0			33.1432	29.7095	32.3147	30.192							0	0	0	0	33.1432	29.7095	32.3147	30.192	0	0	0	0	0	0					1.05415e-08	1.13904e-07	1.87204e-08	8.15289e-08							NaN	NaN	NaN	NaN	NaN	0.3091	0.7148
HSA-MIR-3186-3P	0	0	30.5953					31.723	32.1701			33.245			0	0	-0.325175	0	0	0	0	-1.45294	-1.90008	0	0	-2.97489	0	0															NaN	NaN	NaN	NaN	NaN	NaN	NaN
HSA-MIR-3186-5P	0	0									32.3891				0	0	0	0	0	0	0	0	0	0	32.3891	0	0	0											1.77792e-08				NaN	NaN	NaN	1	NaN	NaN	NaN
HSA-MIR-3187	0	0	29.923								33.7733	33.1247	30.2281	30.6931	0	0	29.923	0	0	0	0	0	0	0	33.7733	33.1247	30.2281	30.6931			9.82353e-08								6.81134e-09	1.06773e-08	7.95097e-08	5.76029e-08	NaN	NaN	1.318	0.283	NaN	NaN	NaN
HSA-MIR-3189	0	0													0	0	0	0	0	0	0	0	0	0	0	0	0	0															NaN	NaN	NaN	NaN	NaN	NaN	NaN
HSA-MIR-3190	0	0									31.763				0	0	0	0	0	0	0	0	0	0	31.763	0	0	0											2.74396e-08				NaN	NaN	NaN	1	NaN	NaN	NaN
HSA-MIR-3193	0	0			31.7868	33.2725			30.4383		32.1131	34.7499	30.6207	31.1833	0	0	0	0	31.7868	33.2725	0	0	30.4383	0	32.1131	34.7499	30.6207	31.1833					2.69907e-08	9.63797e-09			6.873e-08		2.15278e-08	3.46117e-09	6.05686e-08	4.10107e-08	NaN	NaN	1.409	1.255	NaN	1.056	NaN
HSA-MIR-3195	0	0	22.825	24.5257		23.0096			26.438		24.1951	24.689		22.3562	0	0	22.825	24.5257	0	23.0096	0	0	26.438	0	24.1951	24.689	0	22.3562			1.3458e-05	4.14033e-06		1.18416e-05			1.09994e-06		5.20643e-06	3.69723e-06		1.86261e-05	NaN	NaN	NaN	0.9286	NaN	NaN	NaN
HSA-MIR-3199	0	30.2948			30.6266	29.9954							30.4722	30.3492	0	30.2948	0	0	30.6266	29.9954	0	0	0	0	0	0	30.4722	30.3492		7.59203e-08			6.03223e-08	9.34297e-08							6.71357e-08	7.31096e-08	NaN	NaN	0.5608	NaN	2.63	0.8478	NaN
HSA-MIR-3200-5P	0	30.3988			29.3884			30.1771	29.7514			31.4147	31.3247	30.5477	0	30.3988	0	0	29.3884	0	0	30.1771	29.7514	0	0	31.4147	31.3247	30.5477		7.0638e-08			1.42299e-07			8.23735e-08	1.10647e-07			3.49333e-08	3.71809e-08	6.3714e-08	NaN	NaN	0.244	NaN	1.922	1.571	NaN
HSA-MIR-3202	0	0			31.953	32.3747	34.5405						32.8743	30.649	0	0	0	0	31.953	32.3747	34.5405	0	0	0	0	0	32.8743	30.649					2.40539e-08	1.79578e-08	4.00205e-09						1.27017e-08	5.93904e-08	NaN	NaN	0.5278	NaN	NaN	1.682	0.3644
HSA-MIR-323B-5P	0	0		31.2187	31.7237			32.3882			29.8295		30.0244		0	0	0	31.2187	31.7237	0	0	32.3882	0	0	29.8295	0	30.0244	0				4.00161e-08	2.81984e-08			1.77908e-08			1.04814e-07		9.15704e-08		NaN	NaN	1.049	3.01	NaN	0.5435	NaN
HSA-MIR-324-5P	0	32.6564	31.9866		30.9101	32.4884	32.8677	30.3918	31.8164	31.726	31.1834	32.7894	31.2767	31.453	0	32.6564	31.9866	0	30.9101	32.4884	32.8677	30.3918	31.8164	31.726	31.1834	32.7894	31.2767	31.453		1.47725e-08	2.35008e-08		4.95591e-08	1.65968e-08	1.27597e-08	7.09829e-08	2.6442e-08	2.81534e-08	4.10067e-08	1.34709e-08	3.8439e-08	3.40166e-08	NaN	2.103	0.6488	1.735	1.034	1.407	0.4719
HSA-MIR-325	0	30.7132								30.6168					0	-0.659418	0	0	0	0	0	0	0	-0.563086	0	0	0	0															NaN	1.068	NaN	NaN	0.9362	NaN	NaN
HSA-MIR-331-3P	0	0	29.5671	30.3551			30.5947	30.3274			30.0495	34.928	30.049	30.3402	0	0	0.391682	-0.396288	0	0	-0.635948	-0.368588	0	0	-0.0906678	-4.96919	-0.0902378	-0.381428			76.224												NaN	NaN	0.8007	2.007	NaN	NaN	1.202
HSA-MIR-331-5P	0	0	31.3773												0	0	31.3773	0	0	0	0	0	0	0	0	0	0	0			3.58514e-08												NaN	NaN	NaN	NaN	NaN	NaN	NaN
HSA-MIR-335*	0	0	32.4398		30.4321	29.9823	30.9503		31.2334			32.4278		29.2576	0	0	32.4398	0	30.4321	29.9823	30.9503	0	31.2334	0	0	32.4278	0	29.2576			1.71651e-08		6.90299e-08	9.42832e-08	4.81973e-08		3.9611e-08			1.73081e-08		1.55809e-07	NaN	NaN	NaN	NaN	NaN	1.166	1.06
HSA-MIR-338-5P	0	29.7347	29.9583		29.6365	31.6414		29.747	30.0343	32.9212	34.7464		30.3602	30.4096	0	29.7347	29.9583	0	29.6365	31.6414	0	29.747	30.0343	32.9212	34.7464	0	30.3602	30.4096		1.11935e-07	9.58608e-08		1.19815e-07	2.98523e-08		1.10981e-07	9.09416e-08	1.22953e-08	3.46979e-09		7.25543e-08	7.0113e-08	NaN	0.5016	0.6689	0.08018	4.279	1.858	NaN
HSA-MIR-339-5P	0	29.9854	30.9495		29.4629	29.3908	29.7843		33.3882	34.9084	29.5089	29.8891	28.603	30.8696	0	29.9854	30.9495	0	29.4629	29.3908	29.7843	0	33.3882	34.9084	29.5089	29.8891	28.603	30.8696		9.40817e-08	4.82243e-08		1.35138e-07	1.42067e-07	1.0815e-07		8.89521e-09	3.10121e-09	1.30897e-07	1.00576e-07	2.45262e-07	5.09708e-08	NaN	0.09979	1.783	2.386	2.837	1.653	1.723
HSA-MIR-340*	0	0	30.3154			28.0195	32.1742	30.2199			34.9951		29.1776	30.1008	0	0	30.3154	0	0	28.0195	32.1742	30.2199	0	0	34.9951	0	29.1776	30.1008			7.48411e-08			3.67535e-07	2.06354e-08	7.9964e-08			2.92033e-09		1.64687e-07	8.68497e-08	NaN	NaN	1.728	0.07683	NaN	NaN	0.4745
HSA-MIR-34A*	0	0				31.4415						31.7037	32.6484		0	0	0	0	0	31.4415	0	0	0	0	0	31.7037	32.6484	0						3.42905e-08						2.85922e-08	1.48548e-08		NaN	NaN	0.4731	NaN	NaN	NaN	NaN
HSA-MIR-34B	0	0	32.2563							34.5239	33.5938			34.3966	0	0	32.2563	0	0	0	0	0	0	34.5239	33.5938	0	0	34.3966			1.94929e-08							4.04828e-09	7.71352e-09			4.42172e-09	NaN	0.9484	NaN	1.024	NaN	NaN	NaN
HSA-MIR-34B*	0	0		31.2185				31.1086					32.2545	30.2003	0	0	0	31.2185	0	0	0	31.1086	0	0	0	0	32.2545	30.2003				4.00217e-08				4.31901e-08					1.95173e-08	8.10589e-08	NaN	NaN	0.262	NaN	NaN	NaN	NaN
HSA-MIR-34C-3P	0	29.6809	29.6632			30.0157	29.0029					33.648			0	0.0464878	0.0642088	0	0	-0.288341	0.724459	0	0	0	0	-3.92066	0	0		96.8291	95.647				60.5224								NaN	NaN	NaN	NaN	3.184	NaN	2.691
HSA-MIR-34C-5P	0	30.5699			31.0566		34.2761						32.5274		0	30.5699	0	0	31.0566	0	34.2761	0	0	0	0	0	32.5274	0		6.27399e-08			4.47752e-08		4.80687e-09						1.61539e-08		NaN	NaN	0.378	NaN	6.088	1.763	0.2465
HSA-MIR-3605-3P	0	31.0154					34.9412	32.015					32.0007	33.4652	0	31.0154	0	0	0	0	34.9412	32.015	0	0	0	0	32.0007	33.4652		4.6071e-08					3.03137e-09	2.30429e-08					2.32718e-08	8.43273e-09	NaN	NaN	0.8249	NaN	6.772	NaN	0.2354
HSA-MIR-3605-5P	0	0	31.614		31.634	31.9288						32.7342	33.2451	31.6933	0	0	31.614	0	31.634	31.9288	0	0	0	0	0	32.7342	33.2451	31.6933			3.04257e-08		3.00066e-08	2.4461e-08						1.39966e-08	9.82276e-09	2.8799e-08	NaN	NaN	0.2955	NaN	NaN	1.519	NaN
HSA-MIR-3607-3P	0	30.9398				31.3795		30.876			30.6923		31.1175	30.2204	0	30.9398	0	0	0	31.3795	0	30.876	0	0	30.6923	0	31.1175	30.2204		4.8549e-08				3.57946e-08		5.07469e-08			5.76348e-08		4.2923e-08	7.99374e-08	NaN	NaN	0.4779	1.608	2.241	NaN	NaN
HSA-MIR-361-3P	0	0	32.5241			32.3025		34.4394	33.6123	34.0904	33.962	33.4484	33.7677	32.8609	0	0	-0.363898	0	0	-0.142248	0	-2.27922	-1.45215	-1.93015	-1.80176	-1.28818	-1.60747	-0.700698															NaN	1.332	0.3766	0.825	NaN	NaN	NaN
HSA-MIR-3610	0	0	31.6874		32.6776	31.9777			33.9256		33.0436	31.7578			0	0	0.058103	0	-0.932087	-0.232137	0	0	-2.18003	0	-1.29809	-0.012277	0	0			96.0526												NaN	NaN	NaN	0.7952	NaN	0.6879	NaN
HSA-MIR-3611	0	0												31.8678	0	0	0	0	0	0	0	0	0	0	0	0	0	31.8678														2.55177e-08	NaN	NaN	NaN	NaN	NaN	NaN	NaN
HSA-MIR-3612	0	0												29.786	0	0	0	0	0	0	0	0	0	0	0	0	0	29.786														1.08023e-07	NaN	NaN	NaN	NaN	NaN	NaN	NaN
HSA-MIR-3614-3P	0	31.3145		30.9996				31.9726			31.0333	31.2774		32.1215	0	0.201872	0	0.516785	0	0	0	-0.456225	0	0	0.483115	0.239025	0	-0.605085		86.9422		69.8928							71.5431	84.7318			NaN	NaN	NaN	1.321	1.798	NaN	NaN
HSA-MIR-3616-3P	0	0	31.8863					32.4393		32.1955	32.419		31.7644		0	0	31.8863	0	0	0	0	32.4393	0	32.1955	32.419	0	31.7644	0			2.51923e-08					1.71714e-08		2.0333e-08	1.7415e-08		2.74143e-08		NaN	1.988	0.6057	0.9644	NaN	NaN	NaN
HSA-MIR-3617	0	31.4374											31.1904		0	31.4374	0	0	0	0	0	0	0	0	0	0	31.1904	0		3.43871e-08											4.08091e-08		NaN	NaN	0.535	NaN	1.869	NaN	NaN
HSA-MIR-3618	0	0													0	0	0	0	0	0	0	0	0	0	0	0	0	0															NaN	NaN	NaN	NaN	NaN	NaN	NaN
HSA-MIR-3621	0	0	28.698		29.8824				32.562		29.4608		27.8088		0	0	28.698	0	29.8824	0	0	0	32.562	0	29.4608	0	27.8088	0			2.29643e-07		1.01045e-07				1.57714e-08		1.35339e-07		4.25318e-07		NaN	NaN	1.672	1.334	NaN	0.6685	NaN
HSA-MIR-3622B-3P	0	29.947	27.5057	34.0708	30.3478	32.5412	30.49	31.2453	33.9615	28.678	32.9794	28.5555	29.8049	29.9275	0	29.947	27.5057	34.0708	30.3478	32.5412	30.49	31.2453	33.9615	28.678	32.9794	28.5555	29.8049	29.9275		9.66202e-08	5.24751e-07	5.54216e-09	7.31826e-08	1.60005e-08	6.63116e-08	3.92848e-08	5.97811e-09	2.32841e-07	1.1809e-08	2.53473e-07	1.06616e-07	9.79327e-08	NaN	8.246	0.8532	0.2369	3.206	0.9853	1.163
HSA-MIR-363*	0	0	30.644								30.6104			33.8897	0	0	30.644	0	0	0	0	0	0	0	30.6104	0	0	33.8897			5.95975e-08								6.10026e-08			6.28342e-09	NaN	NaN	NaN	2.446	NaN	NaN	NaN
HSA-MIR-3646	0	0											31.6005		0	0	0	0	0	0	0	0	0	0	0	0	31.6005	0													3.07113e-08		NaN	NaN	1	NaN	NaN	NaN	NaN
HSA-MIR-3647-3P	0	0			34.7314	31.1646					34.4932		32.6094	33.7394	0	0	0	0	34.7314	31.1646	0	0	0	0	34.4932	0	32.6094	33.7394					3.50591e-09	4.15443e-08					4.13546e-09		1.52609e-08	6.97319e-09	NaN	NaN	1.128	0.7661	NaN	0.4359	NaN
HSA-MIR-3648	0	33.8026		30.3246	31.6326	30.4045		30.6203	33.4298	29.4293	31.1983	31.861	31.4302	30.9049	0	-4.79561	0	-1.31761	-2.62557	-1.39743	0	-1.6133	-4.42276	-0.42223	-2.19129	-2.85397	-2.42319	-1.89783															NaN	7.382	0.4168	1.227	0.3337	0.6094	NaN
HSA-MIR-3650	0	0				30.228								32.5508	0	0	0	0	0	30.228	0	0	0	0	0	0	0	32.5508						7.95169e-08								1.58945e-08	NaN	NaN	NaN	NaN	NaN	NaN	NaN
HSA-MIR-3651	0	0	31.8919	33.9706	31.3664	28.658		32.9837			32.3744	32.503	31.6699	30.3107	0	0	31.8919	33.9706	31.3664	28.658	0	32.9837	0	0	32.3744	32.503	31.6699	30.3107			2.50954e-08	5.94081e-09	3.61228e-08	2.36099e-07		1.17736e-08			1.79615e-08	1.64299e-08	2.92698e-08	7.50884e-08	NaN	NaN	0.5744	0.8836	NaN	1.193	NaN
HSA-MIR-3658	0	0								31.7414	32.4724			30.5681	0	0	0	0	0	0	0	0	0	31.7414	32.4724	0	0	30.5681										2.78541e-08	1.67817e-08			6.28164e-08	NaN	1.471	NaN	0.5021	NaN	NaN	NaN
HSA-MIR-3661	0	34.7097		31.5793	30.844	33.3929	32.0226	33.8493	32.5693	32.162	32.3531		34.5756	31.3828	0	-4.25919	0	-1.12877	-0.393448	-2.94241	-1.57201	-3.39877	-2.1188	-1.71147	-1.90257	0	-4.12507	-0.932228															NaN	2.763	0.1172	1.371	0.4428	2.619	1.507
HSA-MIR-3662	0	0						31.8499							0	0	0	0	0	0	0	2.50156	0	0	0	0	0	0								17.6586							NaN	NaN	NaN	NaN	NaN	NaN	NaN
HSA-MIR-3663-3P	0	33.8989			32.2805		34.3958	29.9444		32.4798	31.9021	31.1679	32.5854		0	33.8989	0	0	32.2805	0	34.3958	29.9444	0	32.4798	31.9021	31.1679	32.5854	0		6.24321e-09			1.91697e-08		4.42424e-09	9.67882e-08		1.66958e-08	2.4917e-08	4.14505e-08	1.55176e-08		NaN	1.771	0.372	1.497	0.6206	0.7731	0.2324
HSA-MIR-3664	0	0				29.5059	29.962	30.3377				34.9631	31.7892		0	0	0	0	0	-1.43791	-1.89397	-2.26969	0	0	0	-6.89504	-3.72119	0															NaN	NaN	0.4733	NaN	NaN	NaN	3.68
HSA-MIR-3667-5P	0	0			30.315			33.8111	32.8958			32.925	31.0606		0	0	0	0	30.315	0	0	33.8111	32.8958	0	0	32.925	31.0606	0					7.48645e-08			6.63524e-09	1.25131e-08			1.22631e-08	4.46503e-08		NaN	NaN	1.092	NaN	NaN	3.08	NaN
HSA-MIR-3668	0	0													0	0	0	0	0	0	0	0	0	0	0	0	0	0															NaN	NaN	NaN	NaN	NaN	NaN	NaN
HSA-MIR-367	0	0													0	0	0	0	0	0	0	0	0	0	0	0	0	0															NaN	NaN	NaN	NaN	NaN	NaN	NaN
HSA-MIR-3672	0	0													0	0	0	0	0	0	0	0	0	0	0	0	0	0															NaN	NaN	NaN	NaN	NaN	NaN	NaN
HSA-MIR-3673	0	0													0	0	0	0	0	0	0	0	0	0	0	0	0	0															NaN	NaN	NaN	NaN	NaN	NaN	NaN
HSA-MIR-3674	0	31.2344	31.1534		30.5901						32.1002		34.4197		0	-1.81782	-1.73675	0	-1.17345	0	0	0	0	0	-2.68361	0	-5.00311	0															NaN	NaN	0.08281	1.036	3.124	1.981	NaN
HSA-MIR-3676	0	31.22	33.9997	32.4949			31.3538	31.2601						33.0902	0	31.22	33.9997	32.4949	0	0	31.3538	31.2601	0	0	0	0	0	33.0902		3.99799e-08	5.82182e-09	1.65215e-08			3.64389e-08	3.88847e-08						1.09361e-08	NaN	NaN	NaN	NaN	3.361	NaN	1.619
HSA-MIR-3677	0	0	30.7008		32.7237	30.2374	30.527	30.9455		31.9859	32.8537		29.6472	31.1187	0	0	30.7008	0	32.7237	30.2374	30.527	30.9455	0	31.9859	32.8537	0	29.6472	31.1187			5.72978e-08		1.40992e-08	7.90032e-08	6.46343e-08	4.83579e-08		2.35117e-08	1.28844e-08		1.18934e-07	4.28882e-08	NaN	1.366	1.561	0.424	NaN	0.3114	1.859
HSA-MIR-3678-3P	0	30.3909			29.7147				30.6906	29.6715	30.2253	30.3418		33.5085	0	-1.16594	0	0	-0.489733	0	0	0	-1.46567	-0.446583	-1.00037	-1.11684	0	-4.28357															NaN	3.033	NaN	1.17	1.726	1.119	NaN
HSA-MIR-3678-5P	0	0					30.1516					31.7112			0	0	0	0	0	0	30.1516	0	0	0	0	31.7112	0	0							8.38425e-08					2.84424e-08			NaN	NaN	NaN	NaN	NaN	NaN	1.681
HSA-MIR-3679-5P	0	0	34.2193			30.3534	33.7112			33.3707					0	0	34.2193	0	0	30.3534	33.7112	0	0	33.3707	0	0	0	0			4.99983e-09			7.28981e-08	7.11069e-09			9.00389e-09					NaN	1.501	NaN	NaN	NaN	NaN	0.5867
HSA-MIR-3680	0	0	32.5579								31.6493				0	0	32.5579	0	0	0	0	0	0	0	31.6493	0	0	0			1.5816e-08								2.96899e-08				NaN	NaN	NaN	1.411	NaN	NaN	NaN
HSA-MIR-3680*	0	0		32.7991			30.077		29.7557	32.792			29.5944		0	0	0	32.7991	0	0	30.077	0	29.7557	32.792	0	0	29.5944	0				1.33814e-08			8.82919e-08		1.1032e-07	1.3447e-08			1.23366e-07		NaN	0.4547	0.9427	NaN	NaN	NaN	1.478
HSA-MIR-3681	0	30.7174	32.6613	32.7075		32.0106		29.6912		30.6694	30.0135			31.537	0	0.527748	-1.41618	-1.46235	0	-0.765386	0	1.55398	0	0.575794	1.23164	0	0	-0.291856		69.3637						34.0568		67.0917	42.5832				NaN	2.748	NaN	2.452	2.491	NaN	NaN
HSA-MIR-3681*	0	31.1254	32.5079	31.205		31.422	31.3356	30.8259			30.3651	33.6076	33.5293		0	0.446913	-0.935586	0.367324	0	0.150344	0.236724	0.746434	0	0	1.20715	-2.03526	-1.95696	0		73.3611		77.5219		90.1036	84.867	59.6075			43.3122				NaN	NaN	0.1423	3.197	3.122	NaN	1.426
HSA-MIR-3682	0	0										34.1979			0	0	0	0	0	0	0	0	0	0	0	34.1979	0	0												5.07483e-09			NaN	NaN	NaN	NaN	NaN	NaN	NaN
HSA-MIR-3683	0	0													0	0	0	0	0	0	0	0	0	0	0	0	0	0															NaN	NaN	NaN	NaN	NaN	NaN	NaN
HSA-MIR-3684	0	31.1792				30.0801									0	31.1792	0	0	0	30.0801	0	0	0	0	0	0	0	0		4.11255e-08				8.81012e-08									NaN	NaN	NaN	NaN	1.443	NaN	NaN
HSA-MIR-3685	0	30.5317	33.2154					27.3922		30.3523	34.7589		30.9325		0	30.5317	33.2154	0	0	0	0	27.3922	0	30.3523	34.7589	0	30.9325	0		6.44248e-08	1.00269e-08					5.67729e-07		7.29527e-08	3.43981e-09		4.87949e-08		NaN	3.322	0.5021	0.08872	2.749	NaN	NaN
HSA-MIR-3686	0	0													0	0	0	0	0	0	0	0	0	0	0	0	0	0															NaN	NaN	NaN	NaN	NaN	NaN	NaN
HSA-MIR-3689B	0	0	30.3036			31.9713				31.4288	33.6275				0	0	30.3036	0	0	31.9713	0	0	0	31.4288	33.6275	0	0	0			7.54599e-08			2.37517e-08				3.45925e-08	7.53574e-09				NaN	2.635	NaN	0.3252	NaN	NaN	NaN
HSA-MIR-3689B*	0	0	32.0306		32.3558	30.4983	31.5976	31.3014	31.3389	31.4461			34.8455	31.5154	0	0	0.339084	0	0.0139643	1.87145	0.772154	1.06832	1.03083	0.923644	0	0	-2.47575	0.854304			79.0543		99.0367	27.3298	58.5542	47.6873	48.9427	52.7176				55.3132	NaN	2.958	0.06335	NaN	NaN	0.5987	1.319
HSA-MIR-3691	0	32.2387				31.3698		32.9693			32.6358		32.508	31.9075	0	32.2387	0	0	0	31.3698	0	32.9693	0	0	32.6358	0	32.508	31.9075		1.97325e-08				3.60371e-08		1.18916e-08			1.49848e-08		1.63721e-08	2.4825e-08	NaN	NaN	0.4812	1.104	2.405	NaN	NaN
HSA-MIR-3692	0	0	34.6235			31.2018				32.8346	30.0389	30.285	30.6725		0	0	-5.52052	0	0	-2.09885	0	0	0	-3.7317	-0.935944	-1.18207	-1.56953	0															NaN	0.9685	0.9795	3.809	NaN	NaN	NaN
HSA-MIR-370	0	30.7834	34.637	31.1945	34.6493	34.2273	33.7429	32.3673	31.8138	32.9235		33.8079	32.0203	33.4286	0	0.450106	-3.40348	0.0390186	-3.41582	-2.99382	-2.50942	-1.13375	-0.580321	-1.69001	0	-2.57443	-0.786761	-2.1951		73.1989		97.3317											NaN	2.002	0.8463	NaN	8.271	0.2302	0.5618
HSA-MIR-371-3P	0	31.6796	32.015		31.7111	32.6465		30.9302			28.1639		30.4942	29.056	0	31.6796	32.015	0	31.7111	32.6465	0	30.9302	0	0	28.1639	0	30.4942	29.056		2.90738e-08	2.30416e-08		2.84445e-08	1.48741e-08		4.88755e-08			3.32513e-07		6.6122e-08	1.79169e-07	NaN	NaN	0.6974	8.791	1.272	0.5047	NaN
HSA-MIR-371-5P	0	0	32.2373			33.0396							31.8878	32.8003	0	0	32.2373	0	0	33.0396	0	0	0	0	0	0	31.8878	32.8003			1.97515e-08			1.13261e-08							2.51664e-08	1.33698e-08	NaN	NaN	1.077	NaN	NaN	NaN	NaN
HSA-MIR-3713	0	32.4667	30.6436		31.4364		31.311	31.0525	29.2563	28.4438	30.4875		31.1052	31.1989	0	-2.71882	-0.895635	0	-1.68846	0	-1.56308	-1.30459	0.491575	1.30414	-0.739635	0	-1.35727	-1.45094									71.1248	40.4964					NaN	9.061	0.3236	1.245	0.5222	0.4328	0.6148
HSA-MIR-372	0	33.9324	33.5626		32.8136			34.2545							0	33.9324	33.5626	0	32.8136	0	0	34.2545	0	0	0	0	0	0		6.09996e-09	7.8822e-09		1.32471e-08			4.87935e-09							NaN	NaN	NaN	NaN	1.467	1.292	NaN
HSA-MIR-373	0	0													0	0	0	0	0	0	0	0	0	0	0	0	0	0															NaN	NaN	NaN	NaN	NaN	NaN	NaN
HSA-MIR-373*	0	0													0	0	0	0	0	0	0	0	0	0	0	0	0	0															NaN	NaN	NaN	NaN	NaN	NaN	NaN
HSA-MIR-374A*	0	0				32.063	32.8811		31.785		32.7835		31.2395	30.9169	0	0	0	0	0	-1.52328	-2.34142	0	-1.24527	0	-2.24376	0	-0.699788	-0.377258															NaN	NaN	0.8592	0.7386	NaN	NaN	0.6034
HSA-MIR-374B*	0	0				31.1709						31.6889	34.8873		0	0	0	0	0	31.1709	0	0	0	0	0	31.6889	34.8873	0						4.13642e-08						2.8887e-08	3.14679e-09		NaN	NaN	0.1574	NaN	NaN	NaN	NaN
HSA-MIR-376A	0	0	31.9137		30.8462	31.7217	34.1704	30.8229	31.7635	33.109	31.1818	32.0078	30.0731	30.4267	0	0	31.9137	0	30.8462	31.7217	34.1704	30.8229	31.7635	33.109	31.1818	32.0078	30.0731	30.4267			2.47178e-08		5.18043e-08	2.82367e-08	5.17245e-09	5.26488e-08	2.74301e-08	1.07948e-08	4.10534e-08	2.31578e-08	8.85284e-08	6.92883e-08	NaN	0.7665	1.42	1.651	NaN	1.398	0.1818
HSA-MIR-376B	0	0			30.0391	31.3255	32.725	30.9705					31.3348		0	0	0	0	30.0391	31.3255	32.725	30.9705	0	0	0	0	31.3348	0					9.06402e-08	3.71613e-08	1.40859e-08	4.75294e-08					3.6922e-08		NaN	NaN	0.6742	NaN	NaN	2.785	0.5636
HSA-MIR-376C	0	30.8376	32.766		31.4676	29.0818	30.3732	29.2877	32.0564	32.0207	31.0191	31.3953	29.9639	30.5539	0	1.17122	-0.75714	0	0.54123	2.92698	1.63561	2.72108	-0.04753	-0.01184	0.98974	0.61349	2.04492	1.45492		44.4045			68.7185	13.149	32.1834	15.1661			50.3569	65.3614	24.2336	36.4775	NaN	0.9229	0.8676	1.047	1.964	0.5148	1.431
HSA-MIR-377*	0	0				34.3168		31.836				31.7771	31.366		0	0	0	0	0	34.3168	0	31.836	0	0	0	31.7771	31.366	0						4.67313e-09		2.60865e-08				2.71733e-08	3.61323e-08		NaN	NaN	1.404	NaN	NaN	NaN	NaN
HSA-MIR-378*	0	34.0555	31.294		33.0014	31.6195	32.8248	31.1805	33.7578	33.7365	33.2051	31.8989	31.1939	31.0303	0	34.0555	31.294	0	33.0014	31.6195	32.8248	31.1805	33.7578	33.7365	33.2051	31.8989	31.1939	31.0303		5.60125e-09	3.79819e-08		1.16302e-08	3.03089e-08	1.31452e-08	4.10892e-08	6.88468e-09	6.98708e-09	1.00989e-08	2.49736e-08	4.07099e-08	4.5599e-08	NaN	0.7935	1.045	0.6496	0.596	0.5021	0.7391
HSA-MIR-378C	0	31.6381								33.2933			31.3333		0	31.6381	0	0	0	0	0	0	0	33.2933	0	0	31.3333	0		2.99211e-08								9.49988e-09			3.69604e-08		NaN	0.7277	0.6398	NaN	2.148	NaN	NaN
HSA-MIR-379	0	0						31.2144					32.2559	29.8219	0	0	0	0	0	0	0	-2.69741	0	0	0	0	-3.73895	-1.30488															NaN	NaN	0.3067	NaN	NaN	NaN	NaN
HSA-MIR-379*	0	0													0	0	0	0	0	0	0	0	0	0	0	0	0	0															NaN	NaN	NaN	NaN	NaN	NaN	NaN
HSA-MIR-380*	0	0													0	0	0	0	0	0	0	0	0	0	0	0	0	0															NaN	NaN	NaN	NaN	NaN	NaN	NaN
HSA-MIR-381	0	0	32.0921		32.6721	34.2608		29.1641	33.067		34.71	32.7754	29.8831	33.8175	0	0	32.0921	0	32.6721	34.2608	0	29.1641	33.067	0	34.71	32.7754	29.8831	33.8175			2.18438e-08		1.46122e-08	4.85826e-09		1.66238e-07	1.11131e-08		3.55843e-09	1.36024e-08	1.00993e-07	6.60592e-09	NaN	NaN	3.202	0.2828	NaN	0.7794	NaN
HSA-MIR-382	0	0						32.2663		34.1572	34.5375	34.1481	33.2132	33.5391	0	0	0	0	0	0	0	32.2663	0	34.1572	34.5375	34.1481	33.2132	33.5391								1.93583e-08		5.21989e-09	4.01041e-09	5.25281e-09	1.00422e-08	8.01187e-09	NaN	1.496	0.6506	0.6512	NaN	NaN	NaN
HSA-MIR-383	0	0	30.209												0	0	30.209	0	0	0	0	0	0	0	0	0	0	0			8.05744e-08												NaN	NaN	NaN	NaN	NaN	NaN	NaN
HSA-MIR-384	0	0													0	0	0	0	0	0	0	0	0	0	0	0	0	0															NaN	NaN	NaN	NaN	NaN	NaN	NaN
HSA-MIR-3911	0	0	30.8894				30.967			29.731				32.493	0	0	30.8894	0	0	0	30.967	0	0	29.731	0	0	0	32.493			5.02757e-08				4.76422e-08			1.12225e-07				1.65436e-08	NaN	4.265	NaN	NaN	NaN	NaN	0.8964
HSA-MIR-3912	0	0	32.265										33.8229	31.5083	0	0	0.630656	0	0	0	0	0	0	0	0	0	-0.927304	1.38729			64.5883											38.2283	NaN	NaN	0.252	NaN	NaN	NaN	NaN
HSA-MIR-3913	0	0				32.3788				31.9438	33.2558	34.1045	31.5609	30.7191	0	0	0	0	0	32.3788	0	0	0	31.9438	33.2558	34.1045	31.5609	30.7191						1.79066e-08				2.4208e-08	9.75018e-09	5.41394e-09	3.15653e-08	5.65741e-08	NaN	3.089	0.9102	0.7048	NaN	NaN	NaN
HSA-MIR-3914	0	0													0	0	0	0	0	0	0	0	0	0	0	0	0	0															NaN	NaN	NaN	NaN	NaN	NaN	NaN
HSA-MIR-3915	0	0													0	0	0	0	0	0	0	0	0	0	0	0	0	0															NaN	NaN	NaN	NaN	NaN	NaN	NaN
HSA-MIR-3916	0	0			32.7051	33.042		32.2156	31.4699					33.0707	0	0	0	0	32.7051	33.042	0	32.2156	31.4699	0	0	0	0	33.0707					1.42822e-08	1.13078e-08		2.00518e-08	3.36219e-08					1.10852e-08	NaN	NaN	NaN	NaN	NaN	0.769	NaN
HSA-MIR-3917	0	0	32.6862							33.8232			34.8911		0	0	32.6862	0	0	0	0	0	0	33.8232	0	0	34.8911	0			1.44698e-08							6.57973e-09			3.13849e-09		NaN	1.992	0.2147	NaN	NaN	NaN	NaN
HSA-MIR-3918	0	29.1024	27.0727	28.6738	27.2525	27.2008	28.7751	28.2621	29.6158	28.9086	27.4462	28.378	27.3683	27.2961	0	1.34384	3.3735	1.77247	3.19372	3.24541	1.67109	2.18417	0.830458	1.53766	2.99998	2.06824	3.07791	3.15011		39.3971	9.64886	29.2708	10.9294	10.5447	31.4016	22.0039	56.2351	34.4444	12.5002	23.8451	11.8429	11.2648	NaN	1.105	0.7261	1.724	0.9051	1.324	0.6
HSA-MIR-3919	0	0													0	0	0	0	0	0	0	0	0	0	0	0	0	0															NaN	NaN	NaN	NaN	NaN	NaN	NaN
HSA-MIR-3921	0	0	32.0178				34.2466								0	0	32.0178	0	0	0	34.2466	0	0	0	0	0	0	0			2.29974e-08				4.90631e-09								NaN	NaN	NaN	NaN	NaN	NaN	0.4448
HSA-MIR-3927	0	31.6852					30.8307	34.9951		30.7577					0	-1.45853	0	0	0	0	-0.604038	-4.76841	0	-0.531008	0	0	0	0															NaN	3.8	NaN	NaN	1.872	NaN	1.789
HSA-MIR-3939	0	0	32.6369		33.1871	30.212			32.7145	34.0292	31.6661	29.5425	31.6232	32.1173	0	0	32.6369	0	33.1871	30.212	0	0	32.7145	34.0292	31.6661	29.5425	31.6232	32.1173			1.49731e-08		1.02259e-08	8.04036e-08			1.41892e-08	5.70406e-09	2.93466e-08	1.27886e-07	3.0231e-08	2.14652e-08	NaN	0.5013	0.6004	1.461	NaN	0.3417	NaN
HSA-MIR-3945	0	0		33.7572									33.2169		0	0	0	33.7572	0	0	0	0	0	0	0	0	33.2169	0				6.88749e-09									1.00167e-08		NaN	NaN	0.6343	NaN	NaN	NaN	NaN
HSA-MIR-409-5P	0	0					32.9103					34.0743	30.5371	33.4389	0	0	0	0	0	0	32.9103	0	0	0	0	34.0743	30.5371	33.4389							1.2388e-08					5.52862e-09	6.41812e-08	8.58768e-09	NaN	NaN	2.655	NaN	NaN	NaN	1.123
HSA-MIR-410	0	0			32.845	29.9449		29.9164		34.592	33.1269	32.5192	31.9798	32.5123	0	0	0	0	32.845	29.9449	0	29.9164	0	34.592	33.1269	32.5192	31.9798	32.5123					1.29621e-08	9.67567e-08		9.86891e-08		3.8616e-09	1.06616e-08	1.62458e-08	2.3612e-08	1.63241e-08	NaN	0.4552	0.629	0.7119	NaN	0.5809	NaN
HSA-MIR-411	0	0	32.7456		32.1246	31.1532	31.6613	32.3681		33.6268					0	0	32.7456	0	32.1246	31.1532	31.6613	32.3681	0	33.6268	0	0	0	0			1.38868e-08		2.1356e-08	4.18745e-08	2.94439e-08	1.80391e-08		7.53903e-09					NaN	0.8748	NaN	NaN	NaN	0.9421	1.692
HSA-MIR-411*	0	0	30.6437		33.1603	33.954			29.9985	32.0004		31.2513			0	0	30.6437	0	33.1603	33.954	0	0	29.9985	32.0004	0	31.2513	0	0			5.96123e-08		1.04173e-08	6.00918e-09			9.32298e-08	2.32773e-08		3.91231e-08			NaN	1.646	NaN	NaN	NaN	0.2801	NaN
HSA-MIR-412	0	0	32.2701		31.3164	33.209	33.1113	30.1138		34.3174	31.8877	31.8705			0	0	32.2701	0	31.3164	33.209	33.1113	30.1138	0	34.3174	31.8877	31.8705	0	0			1.93078e-08		3.73954e-08	1.00714e-08	1.07775e-08	8.607e-08		4.67115e-09	2.51673e-08	2.54704e-08			NaN	0.5111	NaN	1.56	NaN	1.556	0.5838
HSA-MIR-421	0	34.5199	31.2524	30.4826	30.3381	30.9955	30.8374	30.7396	31.3252	30.5232	29.8507	31.8924	30.6745		0	34.5199	31.2524	30.4826	30.3381	30.9955	30.8374	30.7396	31.3252	30.5232	29.8507	31.8924	30.6745	0		4.05944e-09	3.90927e-08	6.66549e-08	7.36727e-08	4.6711e-08	5.21234e-08	5.5779e-08	3.7169e-08	6.48021e-08	1.03286e-07	2.50853e-08	5.83507e-08		NaN	2.859	0.5817	2.581	0.1678	1.236	1.139
HSA-MIR-422A	0	0				32.6294		32.8903							0	0	0	0	0	32.6294	0	32.8903	0	0	0	0	0	0						1.50512e-08		1.25614e-08							NaN	NaN	NaN	NaN	NaN	NaN	NaN
HSA-MIR-424*	0	0	31.1762		33.0674	31.7648	32.7879	32.57			31.8236	31.3535	33.8349	34.9392	0	0	3.07945	0	1.18824	2.4908	1.46771	1.68561	0	0	2.43207	2.90209	0.420715	-0.683625			11.8303		43.8839	17.7908	36.1557	31.0872			18.53	13.3778	74.7054		NaN	NaN	0.2429	2.455	NaN	0.6958	1.1
HSA-MIR-4251	0	31.5802	32.0948	31.9372		32.5421	32.3808			32.8082	31.0006	30.9242	31.9005	32.9265	0	31.5802	32.0948	31.9372	0	32.5421	32.3808	0	0	32.8082	31.0006	30.9242	31.9005	32.9265		3.11466e-08	2.18029e-08	2.43195e-08		1.59897e-08	1.78822e-08			1.32966e-08	4.65471e-08	4.90768e-08	2.4946e-08	1.22501e-08	NaN	1.131	0.4797	2.243	2.483	NaN	0.7534
HSA-MIR-4252	0	33.4671	31.1381	29.4875			32.7501			31.0423		31.8741	31.0354	31.8217	0	1.34767	3.67664	5.32723	0	0	2.06466	0	0	3.77246	0	2.94069	3.77937	2.99306		39.2926	7.82026	2.49083			23.9043			7.31773		13.0246	7.28276	12.5603	NaN	2.588	0.5877	NaN	0.4517	NaN	0.3923
HSA-MIR-4257	0	0		31.6235		31.9409	32.895	34.5949			32.9222	31.8407	33.8198	32.554	0	0	0	31.6235	0	31.9409	32.895	34.5949	0	0	32.9222	31.8407	33.8198	32.554				3.02266e-08		2.42573e-08	1.25202e-08	3.85377e-09			1.22861e-08	2.60009e-08	6.59521e-09	1.58592e-08	NaN	NaN	0.2632	1.229	NaN	NaN	1.095
HSA-MIR-4260	0	0	32.061		34.2713	31.55		30.8015	34.9153	31.6196		32.9034	30.7038		0	0	32.061	0	34.2713	31.55	0	30.8015	34.9153	31.6196	0	32.9034	30.7038	0			2.23188e-08		4.82296e-09	3.18058e-08		5.34341e-08	3.08647e-09	3.03074e-08		1.24481e-08	5.71772e-08		NaN	3.568	1.521	NaN	NaN	0.2159	NaN
HSA-MIR-4263	0	0			31.2421	34.7193								31.4891	0	0	0	0	31.2421	34.7193	0	0	0	0	0	0	0	31.4891					3.93734e-08	3.53541e-09								3.31772e-08	NaN	NaN	NaN	NaN	NaN	2.814	NaN
HSA-MIR-4264	0	30.1415	30.0601	27.4954	28.6957	29.643	30.0949	29.7979	29.917	29.5028	29.7194	29.66	30.7569	29.494	0	-0.650036	-0.568661	1.99603	0.795759	-0.151561	-0.603391	-0.306441	-0.425531	-0.0113711	-0.227921	-0.168531	-1.26544	-0.0025611				25.0689	57.604										NaN	2.084	0.1974	1.016	1.254	1.386	0.6844
HSA-MIR-4275	0	32.1215	33.9405				32.3061								0	32.1215	33.9405	0	0	0	32.3061	0	0	0	0	0	0	0		2.14025e-08	6.06585e-09				1.88315e-08								NaN	NaN	NaN	NaN	2.37	NaN	1.102
HSA-MIR-4276	0	0	29.5319		32.9412		31.1019	29.4698			34.9249		31.0185	30.3767	0	0	29.5319	0	32.9412	0	31.1019	29.4698	0	0	34.9249	0	31.0185	30.3767			1.28829e-07		1.21255e-08		4.33909e-08	1.34497e-07			3.06583e-09		4.59738e-08	7.17302e-08	NaN	NaN	0.6829	0.1141	NaN	0.303	1.412
HSA-MIR-4277	0	34.6796	33.753	29.9907		30.2343	32.8434			32.7394	29.1733	30.0836		33.1946	0	-4.59597	-3.66941	0.0928615	0	-0.150699	-2.75983	0	0	-2.65586	0.910301	-3.85e-05	0	-3.11103				93.7661							53.2074				NaN	0.9741	NaN	6.536	0.2379	NaN	0.4488
HSA-MIR-4278	0	30.5445	33.898	32.2964	30.6717		32.497	31.8321	31.5062	30.3719		33.1788	31.2962	30.7234	0	30.5445	33.898	32.2964	30.6717	0	32.497	31.8321	31.5062	30.3719	0	33.1788	31.2962	30.7234		6.38562e-08	6.24737e-09	1.89587e-08	5.84633e-08		1.64975e-08	2.61563e-08	3.27867e-08	7.19673e-08		1.02846e-08	3.79222e-08	5.64053e-08	NaN	4.532	0.5396	NaN	3.768	1.4	0.5144
HSA-MIR-429	0	0													0	0	0	0	0	0	0	0	0	0	0	0	0	0															NaN	NaN	NaN	NaN	NaN	NaN	NaN
HSA-MIR-4291	0	0	33.7938		32.2589			31.4418	33.9549		33.2668	33.9866		31.8534	0	0	33.7938	0	32.2589	0	0	31.4418	33.9549	0	33.2668	33.9866	0	31.8534			6.71487e-09		1.94578e-08			3.4282e-08	6.00539e-09		9.67572e-09	5.87488e-09		2.57741e-08	NaN	NaN	NaN	0.8602	NaN	1.161	NaN
HSA-MIR-4293	0	0	34.5158		33.3813	33.7005		32.3343	33.1971			34.7184	32.4311		0	0	34.5158	0	33.3813	33.7005	0	32.3343	33.1971	0	0	34.7184	32.4311	0			4.07102e-09		8.93786e-09	7.16387e-09		1.84678e-08	1.01547e-08			3.53767e-09	1.72694e-08		NaN	NaN	1.11	NaN	NaN	0.9665	NaN
HSA-MIR-4297	0	30.8671		29.9465	32.948	31.0838	30.8332				32.3919	29.6952	29.9948		0	-2.06447	0	-1.14383	-4.14538	-2.28112	-2.03057	0	0	0	-3.58928	-0.892512	-1.19212	0															NaN	NaN	0.966	0.4597	2.188	0.2098	1.184
HSA-MIR-4298	0	0	34.0657	31.6271	33.084	33.5306	33.9377	32.8105			31.9692			33.5198	0	0	34.0657	31.6271	33.084	33.5306	33.9377	32.8105	0	0	31.9692	0	0	33.5198			5.56148e-09	3.01496e-08	1.09827e-08	8.0591e-09	6.0778e-09	1.32755e-08			2.37855e-08			8.11977e-09	NaN	NaN	NaN	2.723	NaN	0.8438	0.6081
HSA-MIR-4302	0	0	32.0936				31.7508							32.4837	0	0	32.0936	0	0	0	31.7508	0	0	0	0	0	0	32.4837			2.18208e-08				2.76734e-08							1.66508e-08	NaN	NaN	NaN	NaN	NaN	NaN	1.334
HSA-MIR-4305	0	0	31.1322									31.3248		31.4422	0	0	31.1322	0	0	0	0	0	0	0	0	31.3248	0	31.4422			4.24882e-08									3.71783e-08		3.42723e-08	NaN	NaN	NaN	NaN	NaN	NaN	NaN
HSA-MIR-4306	0	30.3912	30.2086		31.8491	30.3777		29.0206	33.6942		29.8192		29.836	32.3273	0	30.3912	30.2086	0	31.8491	30.3777	0	29.0206	33.6942	0	29.8192	0	29.836	32.3273		7.10106e-08	8.05956e-08		2.58501e-08	7.16825e-08		1.83623e-07	7.19532e-09		1.05564e-07		1.04348e-07	1.85577e-08	NaN	NaN	0.9814	2.489	2.769	0.409	NaN
HSA-MIR-4307	0	0						31.5282		31.422			32.964		0	0	0	0	0	0	0	31.5282	0	31.422	0	0	32.964	0								3.22894e-08		3.47553e-08			1.19358e-08		NaN	3.289	0.2552	NaN	NaN	NaN	NaN
HSA-MIR-4308	0	32.1843						32.2341						33.4621	0	32.1843	0	0	0	0	0	32.2341	0	0	0	0	0	33.4621		2.04905e-08						1.97962e-08						8.45104e-09	NaN	NaN	NaN	NaN	2.402	NaN	NaN
HSA-MIR-4309	0	0				34.7401									0	0	0	0	0	34.7401	0	0	0	0	0	0	0	0						3.48476e-09									NaN	NaN	NaN	NaN	NaN	NaN	NaN
HSA-MIR-4310	0	0	31.8464									32.0981		31.2246	0	0	-2.85995	0	0	0	0	0	0	0	0	-3.11165	0	-2.23821															NaN	NaN	NaN	NaN	NaN	NaN	NaN
HSA-MIR-4312	0	34.2872	31.9333			32.5605		32.5498				32.9866		32.7443	0	34.2872	31.9333	0	0	32.5605	0	32.5498	0	0	0	32.9866	0	32.7443		4.7701e-09	2.43855e-08			1.57873e-08		1.59056e-08				1.17506e-08		1.38994e-08	NaN	NaN	NaN	NaN	0.7605	NaN	NaN
HSA-MIR-4315	0	0	34.2912		32.9083									31.1725	0	0	34.2912	0	32.9083	0	0	0	0	0	0	0	0	31.1725			4.75692e-09		1.24052e-08									4.13197e-08	NaN	NaN	NaN	NaN	NaN	0.8039	NaN
HSA-MIR-4319	0	0			31.426	30.2075									0	0	0	0	31.426	30.2075	0	0	0	0	0	0	0	0					3.46614e-08	8.06559e-08									NaN	NaN	NaN	NaN	NaN	0.8818	NaN
HSA-MIR-432	0	31.4418				32.5398	31.8654	30.7793	31.5697			34.9834	30.5742		0	31.4418	0	0	0	32.5398	31.8654	30.7793	31.5697	0	0	34.9834	30.5742	0		3.42822e-08				1.60161e-08	2.55593e-08	5.42627e-08	3.13734e-08			2.94404e-09	6.25518e-08		NaN	NaN	1.26	NaN	2.864	NaN	1.128
HSA-MIR-4321	0	31.6312	28.4489	29.3704	29.8839		29.8565			29.5395		29.0934			0	31.6312	28.4489	29.3704	29.8839	0	29.8565	0	0	29.5395	0	29.0934	0	0		3.00643e-08	2.72915e-07	1.44089e-07	1.00935e-07		1.02869e-07			1.28155e-07		1.74593e-07			NaN	1.759	NaN	NaN	0.3866	0.5266	0.6989
HSA-MIR-4326	0	34.283	30.6855	30.7105			29.7987	32.2322		30.2281		30.835	31.0608	30.3132	0	34.283	30.6855	30.7105	0	0	29.7987	32.2322	0	30.2281	0	30.835	31.0608	30.3132		4.78402e-09	5.79087e-08	5.69143e-08			1.07075e-07	1.98212e-08		7.95097e-08		5.22098e-08	4.46441e-08	7.49569e-08	NaN	3.469	0.4401	NaN	0.1956	NaN	2.313
HSA-MIR-4327	0	31.164	32.4494		33.8944		34.0999	34.6033				30.3285		33.8043	0	31.164	32.4494	0	33.8944	0	34.0999	34.6033	0	0	0	30.3285	0	33.8043		4.1562e-08	1.70515e-08		6.26302e-09		5.43123e-09	3.83158e-09				7.41677e-08		6.66641e-09	NaN	NaN	NaN	NaN	6.278	0.3839	0.4335
HSA-MIR-433	0	0	33.3461												0	0	33.3461	0	0	0	0	0	0	0	0	0	0	0			9.15855e-09												NaN	NaN	NaN	NaN	NaN	NaN	NaN
HSA-MIR-4330	0	29.7082	32.8363			31.7456			32.0903	33.8124	31.9359	32.7392	31.345	31.0715	0	29.7082	32.8363	0	0	31.7456	0	0	32.0903	33.8124	31.9359	32.7392	31.345	31.0715		1.14007e-07	1.30401e-08			2.7773e-08			2.18707e-08	6.62917e-09	2.43402e-08	1.3948e-08	3.66621e-08	4.4313e-08	NaN	0.5094	0.6365	1.059	8.208	NaN	NaN
HSA-MIR-448	0	0						31.9259							0	0	0	0	0	0	0	31.9259	0	0	0	0	0	0								2.45109e-08							NaN	NaN	NaN	NaN	NaN	NaN	NaN
HSA-MIR-449A	0	0												31.5785	0	0	0	0	0	0	0	0	0	0	0	0	0	31.5785														3.11826e-08	NaN	NaN	NaN	NaN	NaN	NaN	NaN
HSA-MIR-449B	0	0		32.3051	31.8402	30.7051	34.1324			34.1768	32.3933			30.3772	0	0	0	32.3051	31.8402	30.7051	34.1324	0	0	34.1768	32.3933	0	0	30.3772				1.88456e-08	2.60103e-08	5.71285e-08	5.31032e-09			5.14927e-09	1.77269e-08			7.17039e-08	NaN	0.621	NaN	1.211	NaN	1.192	0.3171
HSA-MIR-449B*	0	0										32.3162	34.6367	28.4167	0	0	0	0	0	0	0	0	0	0	0	1.41607	-0.9044	5.31552												37.4732		2.51113	NaN	NaN	0.08667	NaN	NaN	NaN	NaN
HSA-MIR-449C	0	0											31.9999		0	0	0	0	0	0	0	0	0	0	0	0	31.9999	0													2.32852e-08		NaN	NaN	1	NaN	NaN	NaN	NaN
HSA-MIR-450A	0	0		31.6014	30.127	30.5723		30.896					32.2268	30.8932	0	0	0	31.6014	30.127	30.5723	0	30.896	0	0	0	0	32.2268	30.8932				3.06924e-08	8.52867e-08	6.2636e-08		5.00462e-08					1.98963e-08	5.01427e-08	NaN	NaN	0.2748	NaN	NaN	1.982	NaN
HSA-MIR-450B-3P	0	0						32.5629		31.5739			33.9253	33.6705	0	0	0	0	0	0	0	32.5629	0	31.5739	0	0	33.9253	33.6705								1.5761e-08		3.12835e-08			6.13022e-09	7.3145e-09	NaN	5.892	0.2609	NaN	NaN	NaN	NaN
HSA-MIR-450B-5P	0	30.0435			29.5434	33.349		34.8424			31.1664	33.6547	32.7121		0	30.0435	0	0	29.5434	33.349	0	34.8424	0	0	31.1664	33.6547	32.7121	0		9.03661e-08			1.27806e-07	9.13984e-09		3.24631e-09			4.14945e-08	7.39464e-09	1.42123e-08		NaN	NaN	0.3836	2.807	10.11	5.803	NaN
HSA-MIR-452	0	0						32.8227			31.0383				0	0	0	0	0	0	0	32.8227	0	0	31.0383	0	0	0								1.31637e-08			4.53462e-08				NaN	NaN	NaN	2.237	NaN	NaN	NaN
HSA-MIR-455-3P	0	0	30.3807				33.9068	31.9781					32.1647		0	0	30.3807	0	0	0	33.9068	31.9781	0	0	0	0	32.1647	0			7.15336e-08				6.20929e-09	2.36385e-08					2.07704e-08		NaN	NaN	0.5559	NaN	NaN	NaN	0.3641
HSA-MIR-455-5P	0	0	32.3914						31.1249		29.8335		33.6992		0	0	32.3914	0	0	0	0	0	31.1249	0	29.8335	0	33.6992	0			1.77511e-08						4.27028e-08		1.04527e-07		7.17013e-09		NaN	NaN	0.1116	4.078	NaN	NaN	NaN
HSA-MIR-487A	0	0						31.996						30.1674	0	0	0	0	0	0	0	31.996	0	0	0	0	0	30.1674								2.33472e-08						8.29264e-08	NaN	NaN	NaN	NaN	NaN	NaN	NaN
HSA-MIR-489	0	0													0	0	0	0	0	0	0	0	0	0	0	0	0	0															NaN	NaN	NaN	NaN	NaN	NaN	NaN
HSA-MIR-490-3P	0	0	31.1704				30.5956	31.7406		33.5695	30.0534	31.9887			0	0	31.1704	0	0	0	30.5956	31.7406	0	33.5695	30.0534	31.9887	0	0			4.13785e-08				6.16308e-08	2.787e-08		7.84487e-09	8.97481e-08	2.34668e-08			NaN	0.4329	NaN	2.805	NaN	NaN	1.684
HSA-MIR-490-5P	0	0								34.8963	33.0089	32.633			0	0	0	0	0	0	0	0	0	34.8963	33.0089	32.633	0	0										3.12717e-09	1.15701e-08	1.50137e-08			NaN	0.5773	NaN	1.21	NaN	NaN	NaN
HSA-MIR-491-3P	0	0	30.3161		33.579		30.6538		31.3136	29.6056				32.7373	0	0	30.3161	0	33.579	0	30.6538	0	31.3136	29.6056	0	0	0	32.7373			7.48095e-08		7.79327e-09		5.91956e-08		3.74693e-08	1.22412e-07				1.3967e-08	NaN	5.647	NaN	NaN	NaN	0.1367	1.352
HSA-MIR-491-5P	0	0	32.3836		30.8891							30.634		30.407	0	0	32.3836	0	30.8891	0	0	0	0	0	0	30.634	0	30.407			1.78467e-08		5.02868e-08							6.00145e-08		7.02399e-08	NaN	NaN	NaN	NaN	NaN	0.9532	NaN
HSA-MIR-492	0	0			33.8187	32.4222	31.6056	32.5571							0	0	0	0	33.8187	32.4222	31.6056	32.5571	0	0	0	0	0	0					6.60006e-09	1.73756e-08	3.06042e-08	1.58248e-08							NaN	NaN	NaN	NaN	NaN	0.4638	2.801
HSA-MIR-493	0	0				34.4911		34.7686						34.5766	0	0	0	0	0	34.4911	0	34.7686	0	0	0	0	0	34.5766						4.14137e-09		3.41671e-09						3.90318e-09	NaN	NaN	NaN	NaN	NaN	NaN	NaN
HSA-MIR-495	0	32.5699	30.2127	30.7701		32.8882		32.1413			34.6919		31.1337	32.5265	0	32.5699	30.2127	30.7701	0	32.8882	0	32.1413	0	0	34.6919	0	31.1337	32.5265		1.56849e-08	8.03646e-08	5.46102e-08		1.25793e-08		2.11114e-08			3.6033e-09		4.24455e-08	1.61636e-08	NaN	NaN	0.9878	0.2102	1.514	NaN	NaN
HSA-MIR-497	0	29.8528	29.9084		29.8819	29.6439	31.6134	34.2804	30.2147		29.7375	31.2388	32.453	34.529	0	29.8528	29.9084	0	29.8819	29.6439	31.6134	34.2804	30.2147	0	29.7375	31.2388	32.453	34.529		1.03138e-07	9.92338e-08		1.0108e-07	1.19202e-07	3.04375e-08	4.79263e-09	8.02561e-08		1.11715e-07	3.94627e-08	1.70088e-08	4.03405e-09	NaN	NaN	0.2044	3.365	5.139	2.043	0.8013
HSA-MIR-497*	0	0										32.5493	34.0447		0	0	0	0	0	0	0	0	0	0	0	32.5493	34.0447	0												1.59107e-08	5.64307e-09		NaN	NaN	0.3939	NaN	NaN	NaN	NaN
HSA-MIR-498	0	31.7481	32.7683				31.8418		30.8265			31.7279	34.0964	34.6815	0	31.7481	32.7683	0	0	0	31.8418	0	30.8265	0	0	31.7279	34.0964	34.6815		2.7725e-08	1.36696e-08				2.5982e-08		5.25165e-08			2.81162e-08	5.4445e-09	3.62945e-09	NaN	NaN	0.1409	NaN	2.974	NaN	1.473
HSA-MIR-499-3P	0	0										31.564		31.521	0	0	0	0	0	0	0	0	0	0	0	31.564	0	31.521												3.14978e-08		3.24523e-08	NaN	NaN	NaN	NaN	NaN	NaN	NaN
HSA-MIR-499-5P	0	0		30.9552		30.4222					31.1002	31.2011	31.9391	34.2076	0	0	0	30.9552	0	30.4222	0	0	0	0	31.1002	31.2011	31.9391	34.2076				4.80362e-08		6.95018e-08					4.34405e-08	4.05076e-08	2.42876e-08	5.04079e-09	NaN	NaN	0.4492	2.014	NaN	NaN	NaN
HSA-MIR-501-5P	0	33.0437			33.7607	31.0416				31.9922		32.7	30.9817	32.3125	0	33.0437	0	0	33.7607	31.0416	0	0	0	31.9922	0	32.7	30.9817	32.3125		1.12945e-08			6.8708e-09	4.52426e-08				2.34098e-08		1.43321e-08	4.71596e-08	1.87486e-08	NaN	2.697	1.228	NaN	1.219	0.301	NaN
HSA-MIR-502-3P	0	32.8174	29.7584		29.9204	28.7744	30.0792	30.3406	30.8056	29.7752	33.8686	29.9498	28.4235	31.0319	0	1.85885	4.91785	0	4.75583	5.90186	4.5971	4.3357	3.87062	4.90106	0.807638	4.72647	6.25278	3.64436		27.5696	3.30811		3.70129	1.67249	4.13176	4.9525	6.83641	3.34684	57.1316	3.77739	1.31137	7.99722	NaN	3.226	1.861	0.1071	0.367	1.109	1.294
HSA-MIR-505*	0	0	30.9173	30.567		32.731	30.7172		32.227			34.1467	33.27		0	0	30.9173	30.567	0	32.731	30.7172	0	32.227	0	0	34.1467	33.27	0			4.93124e-08	6.28656e-08		1.4028e-08	5.66498e-08		1.98937e-08			5.25784e-09	9.65488e-09		NaN	NaN	0.2057	NaN	NaN	NaN	2.645
HSA-MIR-506	0	0	33.0219				34.5441	33.6785			31.7847	30.3828	33.0929	32.4149	0	0	33.0219	0	0	0	34.5441	33.6785	0	0	31.7847	30.3828	33.0929	32.4149			1.14658e-08				3.99199e-09	7.27395e-09			2.70302e-08	7.14261e-08	1.09153e-08	1.74638e-08	NaN	NaN	0.3997	2.481	NaN	NaN	0.3203
HSA-MIR-508-3P	0	0			34.7638									32.894	0	0	0	0	34.7638	0	0	0	0	0	0	0	0	32.894					3.42817e-09									1.25294e-08	NaN	NaN	NaN	NaN	NaN	0.505	NaN
HSA-MIR-508-5P	0	33.9406	30.5063		33.2704		31.7763	33.1553	33.2614	32.8257		32.5429	31.7022		0	33.9406	30.5063	0	33.2704	0	31.7763	33.1553	33.2614	32.8257	0	32.5429	31.7022	0		6.06534e-09	6.55698e-08		9.65214e-09		2.71875e-08	1.04532e-08	9.71234e-09	1.3137e-08		1.59815e-08	2.86203e-08		NaN	1.495	0.736	NaN	0.6468	0.4176	1.532
HSA-MIR-509-3P	0	31.2603		30.3781		31.3218	31.3188	33.1683	30.2435	30.5156	30.4609	31.0717	31.6345	30.6123	0	-1.19614	0	-0.313898	0	-1.25768	-1.25466	-3.10413	-0.179358	-0.451478	-0.396728	-1.00752	-1.57032	-0.548188															NaN	2.8	0.2914	1.647	1.566	NaN	0.7945
HSA-MIR-510	0	0	33.952												0	0	33.952	0	0	0	0	0	0	0	0	0	0	0			6.01773e-09												NaN	NaN	NaN	NaN	NaN	NaN	NaN
HSA-MIR-512-5P	0	33.8336	31.1497		30.3292	33.9425	33.1048	34.3088			30.6279	31.5748			0	33.8336	31.1497	0	30.3292	33.9425	33.1048	34.3088	0	0	30.6279	31.5748	0	0		6.53245e-09	4.19756e-08		7.41302e-08	6.05744e-09	1.08262e-08	4.69915e-09			6.02688e-08	3.12627e-08			NaN	NaN	NaN	4.027	0.7221	3.325	0.6323
HSA-MIR-513A-3P	0	0				31.2595									0	0	0	0	0	-1.2516	0	0	0	0	0	0	0	0															NaN	NaN	NaN	NaN	NaN	NaN	NaN
HSA-MIR-513A-5P	0	0	34.9446				32.7219								0	0	34.9446	0	0	0	32.7219	0	0	0	0	0	0	0			3.02423e-09				1.41167e-08								NaN	NaN	NaN	NaN	NaN	NaN	2.08
HSA-MIR-514	0	0				32.6305	31.296			32.1619					0	0	0	0	0	-0.607667	0.726873	0	0	-0.139047	0	0	0	0							60.4212								NaN	1.94	NaN	NaN	NaN	NaN	1.75
HSA-MIR-514B-3P	0	0					33.7019				33.3255	33.7517			0	0	0	0	0	0	33.7019	0	0	0	33.3255	33.7517	0	0							7.15657e-09				9.2902e-09	6.9138e-09			NaN	NaN	NaN	1.298	NaN	NaN	0.8742
HSA-MIR-515-5P	0	30.7994	32.5177			30.9428	33.2897			32.256	31.0733		32.1867	32.0563	0	2.85616	1.13791	0	0	2.71281	0.365924	0	0	1.39963	2.58226	0	1.4689	1.59927		13.8105	45.4416			15.2532	77.5972			37.9025	16.6979		36.1257	33.0043	NaN	1.624	0.3851	2.088	4.177	NaN	0.3928
HSA-MIR-516A-3P	0	0													0	0	0	0	0	0	0	0	0	0	0	0	0	0															NaN	NaN	NaN	NaN	NaN	NaN	NaN
HSA-MIR-516B	0	0			33.8518		31.3401								0	0	0	0	33.8518	0	31.3401	0	0	0	0	0	0	0					6.45036e-09		3.67856e-08								NaN	NaN	NaN	NaN	NaN	0.3669	2.725
HSA-MIR-517B	0	0	30.3927	31.6663	32.6881		31.4468		30.9337			32.4169	31.422	32.3711	0	0	30.3927	31.6663	32.6881	0	31.4468	0	30.9337	0	0	32.4169	31.422	32.3711			7.09366e-08	2.93419e-08	1.4451e-08		3.41646e-08		4.87574e-08			1.74398e-08	3.47569e-08	1.80027e-08	NaN	NaN	0.5267	NaN	NaN	0.3684	1.134
HSA-MIR-518B	0	0	32.2682			31.7057	30.9105	31.7169	30.2618	30.5397			29.6816		0	0	32.2682	0	0	31.7057	30.9105	31.7169	30.2618	30.5397	0	0	29.6816	0			1.93329e-08			2.85508e-08	4.95475e-08	2.83314e-08	7.76745e-08	6.40692e-08			1.16128e-07		NaN	2.91	1.192	NaN	NaN	NaN	1.114
HSA-MIR-518C	0	0	34.6042		34.0589							32.7285		33.2122	0	0	34.6042	0	34.0589	0	0	0	0	0	0	32.7285	0	33.2122			3.829e-09		5.58787e-09							1.40517e-08		1.00493e-08	NaN	NaN	NaN	NaN	NaN	0.6301	NaN
HSA-MIR-518D-3P	0	32.1733	30.2566		31.5705			30.3373	31.6904	30.1094		33.2618		32.839	0	32.1733	30.2566	0	31.5705	0	0	30.3373	31.6904	30.1094	0	33.2618	0	32.839		2.06484e-08	7.79587e-08		3.13562e-08			7.37162e-08	2.8857e-08	8.63335e-08		9.70978e-09		1.3016e-08	NaN	4.426	NaN	NaN	0.9919	0.6111	NaN
HSA-MIR-518F	0	0				30.317	30.234	32.7763				33.3659		30.861	0	0	0	0	0	30.317	30.234	32.7763	0	0	0	33.3659	0	30.861						7.47602e-08	7.91852e-08	1.35945e-08				9.03378e-09		5.12766e-08	NaN	NaN	NaN	NaN	NaN	NaN	3.109
HSA-MIR-519B-3P	0	0													0	0	0	0	0	0	0	0	0	0	0	0	0	0															NaN	NaN	NaN	NaN	NaN	NaN	NaN
HSA-MIR-519C-3P	0	0				30.8387					32.3421	33.2068			0	0	0	0	0	-0.99272	0	0	0	0	-2.49613	-3.36085	0	0															NaN	NaN	NaN	1.238	NaN	NaN	NaN
HSA-MIR-519D	0	0	31.0335		30.0893			32.2285		30.0471		34.1638	32.3471	34.3984	0	0	31.0335	0	30.0893	0	0	32.2285	0	30.0471	0	34.1638	32.3471	34.3984			4.54976e-08		8.75423e-08			1.98722e-08		9.01383e-08		5.19596e-09	1.83049e-08	4.41636e-09	NaN	8.858	0.4065	NaN	NaN	3.271	NaN
HSA-MIR-519E	0	33.1036		30.2087	30.7926							31.8657	34.8623		0	-4.39574	0	-1.50088	-2.08475	0	0	0	0	0	0	-3.15785	-6.15441	0															NaN	NaN	0.06861	NaN	0.9627	1.938	NaN
HSA-MIR-519E*	0	0	31.3075				31.169								0	0	31.3075	0	0	0	31.169	0	0	0	0	0	0	0			3.76268e-08				4.14187e-08								NaN	NaN	NaN	NaN	NaN	NaN	1.01
HSA-MIR-520A-3P	0	0					29.9541					34.7591			0	0	0	0	0	0	29.9541	0	0	0	0	34.7591	0	0							9.61409e-08					3.43929e-09			NaN	NaN	NaN	NaN	NaN	NaN	5.176
HSA-MIR-520A-5P	0	32.5609	33.6091			32.7518	33.3548			33.9286			33.0324		0	32.5609	33.6091	0	0	32.7518	33.3548	0	0	33.9286	0	0	33.0324	0		1.57833e-08	7.63215e-09			1.38266e-08	9.10317e-09			6.11605e-09			1.13832e-08		NaN	1.271	0.5345	NaN	3.073	NaN	0.9366
HSA-MIR-520B	0	34.8817		33.6053									29.5667	33.6567	0	-2.06861	0	-0.79225	0	0	0	0	0	0	0	0	3.2464	-0.84362													10.5375		NaN	NaN	4.505	NaN	0.4693	NaN	NaN
HSA-MIR-520D-3P	0	0	30.3024				31.6393	30.9708				30.5991	29.9195	33.0646	0	0	30.3024	0	0	0	31.6393	30.9708	0	0	0	30.5991	29.9195	33.0646			7.55233e-08				2.98972e-08	4.75176e-08				6.14827e-08	9.84759e-08	1.11317e-08	NaN	NaN	1.227	NaN	NaN	NaN	0.8165
HSA-MIR-520E	0	0													0	0	0	0	0	0	0	0	0	0	0	0	0	0															NaN	NaN	NaN	NaN	NaN	NaN	NaN
HSA-MIR-520F	0	0													0	0	0	0	0	0	0	0	0	0	0	0	0	0															NaN	NaN	NaN	NaN	NaN	NaN	NaN
HSA-MIR-520H	0	0		31.6232		31.1117		34.8096		32.1573	29.6818	34.3794			0	0	0	-0.48134	0	0.03013	0	-3.66778	0	-1.01541	1.46004	-3.23755	0	0						97.9332					36.3483				NaN	2.117	NaN	6.67	NaN	NaN	NaN
HSA-MIR-523	0	0	31.5297			29.5485				34.0196	30.2144		30.5121	30.1005	0	0	31.5297	0	0	29.5485	0	0	0	34.0196	30.2144	0	30.5121	30.1005			3.22559e-08			1.27356e-07				5.74242e-09	8.027e-08		6.53026e-08	8.68654e-08	NaN	0.2879	0.7399	2.28	NaN	NaN	NaN
HSA-MIR-526B	0	0	29.8925	30.2915	30.6346	31.2143	32.2796	30.9868	31.9386	31.4148	31.8536			33.0512	0	0	0.589507	0.190537	-0.152553	-0.732323	-1.79755	-0.504753	-1.45662	-0.932823	-1.37157	0	0	-2.5692			66.457	87.628											NaN	1.808	NaN	0.7555	NaN	1.181	0.4916
HSA-MIR-526B*	0	0			32.2971	30.4459							29.5677	28.912	0	0	0	0	32.2971	30.4459	0	0	0	0	0	0	29.5677	28.912					1.89498e-08	6.83708e-08							1.25675e-07	1.97981e-07	NaN	NaN	1.287	NaN	NaN	0.3264	NaN
HSA-MIR-527	0	0					34.3278		34.2415						0	0	0	0	0	0	34.3278	0	34.2415	0	0	0	0	0							4.63776e-09		4.92355e-09						NaN	NaN	NaN	NaN	NaN	NaN	0.6383
HSA-MIR-532-3P	0	29.5366	26.1095		27.5328	26.4517	28.126	27.5766	31.5393	27.5882	29.3119	28.042	26.2141	27.7456	0	29.5366	26.1095	0	27.5328	26.4517	28.126	27.5766	31.5393	27.5882	29.3119	28.042	26.2141	27.7456		1.28413e-07	1.38116e-06		5.14997e-07	1.08954e-06	3.41376e-07	4.99607e-07	3.20428e-08	4.95602e-07	1.50052e-07	3.6185e-07	1.28458e-06	4.44361e-07	NaN	3.226	1.513	0.443	0.6272	1.021	0.881
HSA-MIR-539	0	0			32.8121										0	0	0	0	32.8121	0	0	0	0	0	0	0	0	0					1.3261e-08										NaN	NaN	NaN	NaN	NaN	1	NaN
HSA-MIR-542-3P	0	0			34.7207	31.9271	34.2034	32.4914	34.9799	32.1708	34.5608		32.6012	30.3069	0	0	0	0	34.7207	31.9271	34.2034	32.4914	34.9799	32.1708	34.5608	0	32.6012	30.3069					3.53201e-09	2.44895e-08	5.05538e-09	1.65618e-08	2.95117e-09	2.06839e-08	3.9461e-09		1.53486e-08	7.52854e-08	NaN	4.16	0.6975	0.4495	NaN	0.2701	0.5034
HSA-MIR-544	0	0				30.4332									0	0	0	0	0	30.4332	0	0	0	0	0	0	0	0						6.89768e-08									NaN	NaN	NaN	NaN	NaN	NaN	NaN
HSA-MIR-545*	0	0	34.8966			30.7249		31.7985	31.8732		32.7246				0	0	34.8966	0	0	30.7249	0	31.7985	31.8732	0	32.7246	0	0	0			3.12665e-09			5.63479e-08		2.67734e-08	2.54214e-08		1.409e-08				NaN	NaN	NaN	0.9245	NaN	NaN	NaN
HSA-MIR-548A-3P	0	0				30.8163	32.8428	31.3587		32.3271		30.7484			0	0	0	0	0	30.8163	32.8428	31.3587	0	32.3271	0	30.7484	0	0						5.28891e-08	1.29815e-08	3.63144e-08		1.85594e-08		5.54386e-08			NaN	1.326	NaN	NaN	NaN	NaN	0.4591
HSA-MIR-548A-5P	0	0													0	0	0	0	0	0	0	0	0	0	0	0	0	0															NaN	NaN	NaN	NaN	NaN	NaN	NaN
HSA-MIR-548AA	0	0	33.2989		30.9331	30.3632			32.8218		32.7867		32.598		0	0	33.2989	0	30.9331	30.3632	0	0	32.8218	0	32.7867	0	32.598	0			9.4634e-09		4.8776e-08	7.24051e-08			1.3172e-08		1.34967e-08		1.53823e-08		NaN	NaN	0.3816	0.8393	NaN	2.036	NaN
HSA-MIR-548B-3P	0	0		30.0577			31.4595								0	0	0	-2.01583	0	0	-3.41768	0	0	0	0	0	0	0															NaN	NaN	NaN	NaN	NaN	NaN	0.479
HSA-MIR-548D-3P	0	0		33.3098		30.7461	31.3581	30.8736		30.0898	29.3525	31.9427	30.9117		0	0	0	33.3098	0	30.7461	31.3581	30.8736	0	30.0898	29.3525	31.9427	30.9117	0				9.39185e-09		5.55278e-08	3.63292e-08	5.08311e-08		8.75132e-08	1.4589e-07	2.42259e-08	4.95069e-08		NaN	4.25	0.5433	4.013	NaN	NaN	0.8736
HSA-MIR-548D-5P	0	32.1465	31.9417		31.1919	30.1187	29.9663	33.2416	31.0735	31.159	31.0046	30.2906	30.9601	31.4852	0	32.1465	31.9417	0	31.1919	30.1187	29.9663	33.2416	31.0735	31.159	31.0046	30.2906	30.9601	31.4852		2.10343e-08	2.42429e-08		4.0765e-08	8.57758e-08	9.5334e-08	9.84669e-09	4.42526e-08	4.17073e-08	4.64179e-08	7.61435e-08	4.7871e-08	3.32677e-08	NaN	2.083	0.5403	1.313	0.9846	0.7742	2.358
HSA-MIR-548E	0	0	30.6679	33.7982	34.7251		33.4937				34.5007		32.3249		0	0	30.6679	33.7982	34.7251	0	33.4937	0	0	0	34.5007	0	32.3249	0			5.86203e-08	6.69479e-09	3.52142e-09		8.26777e-09				4.11399e-09		1.85877e-08		NaN	NaN	0.9179	0.5092	NaN	0.2926	0.8946
HSA-MIR-548F	0	0	32.3976	28.7432		34.0762		29.8838			34.6308	32.5269		29.7314	0	0	32.3976	28.7432	0	34.0762	0	29.8838	0	0	34.6308	32.5269	0	29.7314			1.76748e-08	2.22547e-07		5.52146e-09		1.00943e-07			3.75926e-09	1.61591e-08		1.12188e-07	NaN	NaN	NaN	0.1634	NaN	NaN	NaN
HSA-MIR-548G	0	0													0	0	0	0	0	0	0	0	0	0	0	0	0	0															NaN	NaN	NaN	NaN	NaN	NaN	NaN
HSA-MIR-548H	0	31.2676	31.6222					32.6378	30.9642	34.4246	29.3674	31.6605	31.4096		0	31.2676	31.6222	0	0	0	0	32.6378	30.9642	34.4246	29.3674	31.6605	31.4096	0		3.86826e-08	3.02524e-08					1.49636e-08	4.77368e-08	4.33664e-09	1.44384e-07	2.94599e-08	3.50574e-08		NaN	0.2508	0.4582	4.73	2.096	NaN	NaN
HSA-MIR-548I	0	0					34.1356	34.4262							0	0	0	0	0	0	34.1356	34.4262	0	0	0	0	0	0							5.29863e-09	4.33205e-09							NaN	NaN	NaN	NaN	NaN	NaN	1.246
HSA-MIR-548J	0	29.8268									32.1867			30.7303	0	3.20898	0	0	0	0	0	0	0	0	0.84909	0	0	2.30551		10.8144									55.5135			20.2289	NaN	NaN	NaN	0.3906	3.317	NaN	NaN
HSA-MIR-548K	0	0			34.8533									30.1421	0	0	0	0	34.8533	0	0	0	0	0	0	0	0	30.1421					3.22201e-09									8.4397e-08	NaN	NaN	NaN	NaN	NaN	0.1886	NaN
HSA-MIR-548L	0	0		31.3743									31.0147	30.9922	0	0	0	31.3743	0	0	0	0	0	0	0	0	31.0147	30.9922				3.59253e-08									4.60947e-08	4.68176e-08	NaN	NaN	0.5785	NaN	NaN	NaN	NaN
HSA-MIR-548N	0	0										31.542			0	0	0	0	0	0	0	0	0	0	0	31.542	0	0												3.19818e-08			NaN	NaN	NaN	NaN	NaN	NaN	NaN
HSA-MIR-548O	0	0					29.9226						30.2131		0	0	0	0	0	0	29.9226	0	0	0	0	0	30.2131	0							9.82659e-08						8.03446e-08		NaN	NaN	0.6109	NaN	NaN	NaN	1.637
HSA-MIR-548P	0	0				31.9003									0	0	0	0	0	31.9003	0	0	0	0	0	0	0	0						2.49488e-08									NaN	NaN	NaN	NaN	NaN	NaN	NaN
HSA-MIR-548S	0	0								32.4923	32.6279	32.6088			0	0	0	0	0	0	0	0	0	32.4923	32.6279	32.6088	0	0										1.65515e-08	1.50665e-08	1.52675e-08			NaN	1.597	NaN	0.8232	NaN	NaN	NaN
HSA-MIR-548V	0	33.6523	30.2236		30.3771	32.1418	31.4621		30.0115	29.6306	30.3193		34.9734		0	-4.58683	-1.15812	0	-1.31165	-3.07637	-2.39661	0	-0.94605	-0.56519	-1.25381	0	-5.90795	0															NaN	6.622	0.03687	2.327	0.3821	1.501	0.9213
HSA-MIR-548W	0	0						34.1296					30.1021	33.9425	0	0	0	0	0	0	0	34.1296	0	0	0	0	30.1021	33.9425								5.32086e-09					8.67673e-08	6.05749e-09	NaN	NaN	4.217	NaN	NaN	NaN	NaN
HSA-MIR-548Y	0	0													0	0	0	0	0	0	0	0	0	0	0	0	0	0															NaN	NaN	NaN	NaN	NaN	NaN	NaN
HSA-MIR-549	0	0	31.6606	31.3662		32.9751					32.5099	32.3749	33.5755	32.1241	0	0	31.6606	31.3662	0	32.9751	0	0	0	0	32.5099	32.3749	33.5755	32.1241			2.94586e-08	3.61276e-08		1.18439e-08					1.6351e-08	1.79549e-08	7.81182e-09	2.1364e-08	NaN	NaN	0.2309	1.211	NaN	NaN	NaN
HSA-MIR-550A	0	0	31.4119		31.6004	30.504	31.0844			31.7694		29.6469			0	0	31.4119	0	31.6004	30.504	31.0844	0	0	31.7694	0	29.6469	0	0			3.50018e-08		3.07126e-08	6.56717e-08	4.39195e-08			2.73178e-08		1.18958e-07			NaN	1.248	NaN	NaN	NaN	0.5335	0.9935
HSA-MIR-550A*	0	0	32.1242	29.5466	33.2252	29.5592		34.5831			29.7636	32.7046		30.0645	0	0	32.1242	29.5466	33.2252	29.5592	0	34.5831	0	0	29.7636	32.7046	0	30.0645			2.13619e-08	1.27521e-07	9.95913e-09	1.26411e-07		3.88544e-09			1.09717e-07	1.42869e-08		8.90584e-08	NaN	NaN	NaN	4.222	NaN	0.2572	NaN
HSA-MIR-550B	0	31.6793		33.928	34.4376	32.8687	32.5069	31.1538	33.8545	31.7315	33.0916	32.5492	31.3026	33.333	0	-2.51255	0	-4.76123	-5.27085	-3.70191	-3.34017	-1.98709	-4.68773	-2.56473	-3.92486	-3.38246	-2.13588	-4.16626															NaN	3.793	1.154	0.837	3.685	0.221	1.097
HSA-MIR-551A	0	30.1259	29.982		29.2013	30.013	30.5894	32.5367		30.4537	30.1305	31.6027	30.247	29.9193	0	30.1259	29.982	0	29.2013	30.013	30.5894	32.5367	0	30.4537	30.1305	31.6027	30.247	29.9193		8.53493e-08	9.43009e-08		1.62009e-07	9.22975e-08	6.18958e-08	1.60495e-08		6.79998e-08	8.50765e-08	3.06645e-08	7.84776e-08	9.84903e-08	NaN	2.136	0.5569	1.513	2.512	1.934	0.9624
HSA-MIR-551B	0	0			32.1694	32.4775				32.2581	31.3767	33.6321	31.6036	34.5103	0	0	0	0	32.1694	32.4775	0	0	0	32.2581	31.3767	33.6321	31.6036	34.5103					2.07034e-08	1.67229e-08				1.94694e-08	3.58649e-08	7.51165e-09	3.06465e-08	4.08671e-09	NaN	2.996	1.065	3.126	NaN	1.211	NaN
HSA-MIR-551B*	0	0									31.4031			30.1836	0	0	0	0	0	0	0	0	0	0	31.4031	0	0	30.1836											3.52155e-08			8.20038e-08	NaN	NaN	NaN	0.7723	NaN	NaN	NaN
HSA-MIR-553	0	0													0	0	0	0	0	0	0	0	0	0	0	0	0	0															NaN	NaN	NaN	NaN	NaN	NaN	NaN
HSA-MIR-561	0	0													0	0	0	0	0	0	0	0	0	0	0	0	0	0															NaN	NaN	NaN	NaN	NaN	NaN	NaN
HSA-MIR-562	0	0					33.8604				27.1835		29.7076	29.3061	0	0	0	0	0	0	-3.39502	0	0	0	3.28186	0	0.757837	1.15931											10.2816		59.1382	44.7727	NaN	NaN	0.6971	10.05	NaN	NaN	0.08587
HSA-MIR-567	0	0		32.634											0	0	0	32.634	0	0	0	0	0	0	0	0	0	0				1.50037e-08											NaN	NaN	NaN	NaN	NaN	NaN	NaN
HSA-MIR-570	0	0			34.0201	30.5649	32.6781		30.5198		33.0438		33.315		0	0	0	0	-2.89946	0.555657	-1.55748	0	0.600817	0	-1.9232	0	-2.19434	0						68.0347			65.938						NaN	NaN	0.2745	0.8302	NaN	0.2833	0.9351
HSA-MIR-572	0	0	27.4384												0	0	0.376437	0	0	0	0	0	0	0	0	0	0	0			77.0337												NaN	NaN	NaN	NaN	NaN	NaN	NaN
HSA-MIR-573	0	0													0	0	0	0	0	0	0	0	0	0	0	0	0	0															NaN	NaN	NaN	NaN	NaN	NaN	NaN
HSA-MIR-576-3P	0	0													0	0	0	0	0	0	0	0	0	0	0	0	0	0															NaN	NaN	NaN	NaN	NaN	NaN	NaN
HSA-MIR-578	0	0	31.0884				31.4518			30.7356	30.0662			30.2922	0	0	-0.182493	0	0	0	-0.545923	0	0	0.170267	0.839707	0	0	0.613697										88.8678	55.8757			65.352	NaN	1.739	NaN	1.566	NaN	NaN	0.5239
HSA-MIR-579	0	0		33.0842	34.1782	32.6625	33.5432	31.3027			32.7482		32.3429	31.343	0	0	0	33.0842	34.1782	32.6625	33.5432	31.3027	0	0	32.7482	0	32.3429	31.343				1.09817e-08	5.14449e-09	1.47097e-08	7.98886e-09	3.77519e-08			1.38615e-08		1.83582e-08	3.67133e-08	NaN	NaN	0.6989	1.323	NaN	0.3295	0.6664
HSA-MIR-582-3P	0	0			31.5753	34.2998							30.1621		0	0	0	0	31.5753	34.2998	0	0	0	0	0	0	30.1621	0					3.12529e-08	4.72846e-09							8.32356e-08		NaN	NaN	3.106	NaN	NaN	1.962	NaN
HSA-MIR-585	0	0			29.61	32.0637	30.7206					32.9239	33.2619		0	0	0	0	29.61	32.0637	30.7206	0	0	0	0	32.9239	33.2619	0					1.22038e-07	2.22771e-08	5.65165e-08					1.22718e-08	9.70898e-09		NaN	NaN	0.2269	NaN	NaN	4.798	2.894
HSA-MIR-586	0	0													0	0	0	0	0	0	0	0	0	0	0	0	0	0															NaN	NaN	NaN	NaN	NaN	NaN	NaN
HSA-MIR-587	0	31.0144		33.0104			33.9799	34.4433		30.5146	32.3933	34.4127	31.0385		0	31.0144	0	33.0104	0	0	33.9799	34.4433	0	30.5146	32.3933	34.4127	31.0385	0		4.61038e-08		1.15578e-08			5.90247e-09	4.28094e-09		6.51896e-08	1.77279e-08	4.37277e-09	4.53396e-08		NaN	7.573	1.19	1.167	5.019	NaN	0.3395
HSA-MIR-588	0	0	31.3404				30.3117		30.9275	32.5007	33.4125	33.3289			0	0	31.3404	0	0	0	30.3117	0	30.9275	32.5007	33.4125	33.3289	0	0			3.67787e-08				7.50343e-08		4.8966e-08	1.64553e-08	8.74628e-09	9.26807e-09			NaN	1.037	NaN	0.3122	NaN	NaN	2.341
HSA-MIR-589	0	33.104	30.6206			32.1284		34.0714		32.6131	34.1683		31.8268	34.1585	0	33.104	30.6206	0	0	32.1284	0	34.0714	0	32.6131	34.1683	0	31.8268	34.1585		1.08322e-08	6.05716e-08			2.13008e-08		5.53951e-09		1.5222e-08	5.17977e-09		2.62535e-08	5.21519e-09	NaN	2.517	0.981	0.4851	1.678	NaN	NaN
HSA-MIR-589*	0	0	31.468					33.7693	33.9485					31.3256	0	0	31.468	0	0	0	0	33.7693	33.9485	0	0	0	0	31.3256			3.36662e-08					6.82992e-09	6.03209e-09					3.71587e-08	NaN	NaN	NaN	NaN	NaN	NaN	NaN
HSA-MIR-590-3P	0	0		30.9364	30.8167	30.8066		30.3588	33.7764		31.0048		31.8815	34.3412	0	0	0	30.9364	30.8167	30.8066	0	30.3588	33.7764	0	31.0048	0	31.8815	34.3412				4.86666e-08	5.28763e-08	5.3247e-08		7.26278e-08	6.79682e-09		4.64102e-08		2.52771e-08	4.59495e-09	NaN	NaN	0.4611	2.122	NaN	1.623	NaN
HSA-MIR-592	0	0													0	0	0	0	0	0	0	0	0	0	0	0	0	0															NaN	NaN	NaN	NaN	NaN	NaN	NaN
HSA-MIR-597	0	0													0	0	0	0	0	0	0	0	0	0	0	0	0	0															NaN	NaN	NaN	NaN	NaN	NaN	NaN
HSA-MIR-602	0	0	27.8348	30.1271	29.8893	28.8464	29.9235		33.3579		29.8316	28.6154	29.7545		0	0	27.8348	30.1271	29.8893	28.8464	29.9235	0	33.3579	0	29.8316	28.6154	29.7545	0			4.1771e-07	8.52784e-08	1.00563e-07	2.07188e-07	9.82053e-08		9.08413e-09		1.04664e-07	2.43173e-07	1.10405e-07		NaN	NaN	0.487	1.157	NaN	0.7464	0.9492
HSA-MIR-603	0	29.2479	33.9947		28.9489		30.0019	29.8827	29.2574	29.6172	28.9837		29.6885	29.2746	0	29.2479	33.9947	0	28.9489	0	30.0019	29.8827	29.2574	29.6172	28.9837	0	29.6885	29.2746		1.56853e-07	5.84227e-09		1.92976e-07		9.30116e-08	1.01024e-07	1.55822e-07	1.21432e-07	1.88387e-07		1.15574e-07	1.53981e-07	NaN	2.228	0.4791	1.958	2.697	1.346	0.8449
HSA-MIR-607	0	0													0	0	0	0	0	0	0	0	0	0	0	0	0	0															NaN	NaN	NaN	NaN	NaN	NaN	NaN
HSA-MIR-608	0	0		33.9197	31.7136	34.8863	31.1084	29.9612	32.5626	32.5027	33.1512		34.0588		0	0	0	0.350134	2.55625	-0.616446	3.16149	4.30861	1.70724	1.76715	1.11859	0	0.211074	0				78.4511	17.0016		11.1762	5.04636	30.6245	29.3788	46.0542		86.3894		NaN	2.231	0.1715	0.8063	NaN	1.466	2.904
HSA-MIR-609	0	0						32.4962						30.4674	0	0	0	0	0	0	0	32.4962	0	0	0	0	0	30.4674								1.65067e-08						6.73581e-08	NaN	NaN	NaN	NaN	NaN	NaN	NaN
HSA-MIR-611	0	33.1838	33.0036		34.4451			31.5806	30.1393	31.3596	34.5593	31.6199	33.9934	31.7276	0	33.1838	33.0036	0	34.4451	0	0	31.5806	30.1393	31.3596	34.5593	31.6199	33.9934	31.7276		1.02491e-08	1.16127e-08		4.27546e-09			3.11381e-08	8.45586e-08	3.6293e-08	3.9501e-09	3.03005e-08	5.8475e-09	2.81222e-08	NaN	4.224	0.1538	0.2604	1.118	0.1892	NaN
HSA-MIR-612	0	0	33.598			31.5578	34.194			30.0842		34.0954	33.7399		0	0	33.598	0	0	31.5578	34.194	0	0	30.0842	0	34.0954	33.7399	0			7.69136e-09			3.16345e-08	5.08821e-09			8.78505e-08		5.4482e-09	6.97073e-09		NaN	16.06	0.288	NaN	NaN	NaN	0.4606
HSA-MIR-613	0	0	30.4664												0	0	30.4664	0	0	0	0	0	0	0	0	0	0	0			6.74038e-08												NaN	NaN	NaN	NaN	NaN	NaN	NaN
HSA-MIR-614	0	30.8858	31.366		34.4554	31.6851	33.3022		30.4194	31.9561	30.6703	34.777	31.1989	30.6214	0	-1.77376	-2.2539	0	-5.34334	-2.57305	-4.19018	0	-1.30739	-2.84405	-1.55828	-5.66492	-2.08682	-1.50937															NaN	1.938	0.7401	2.676	3.813	0.1303	0.3774
HSA-MIR-616	0	0					30.5436					33.6314		30.746	0	0	0	0	0	0	30.5436	0	0	0	0	33.6314	0	30.746							6.38954e-08					7.51498e-09		5.55313e-08	NaN	NaN	NaN	NaN	NaN	NaN	2.25
HSA-MIR-616*	0	0				32.0437									0	0	0	0	0	32.0437	0	0	0	0	0	0	0	0						2.25885e-08									NaN	NaN	NaN	NaN	NaN	NaN	NaN
HSA-MIR-617	0	0	29.9952		32.8337							34.1231		33.2908	0	0	0.0379078	0	-2.80057	0	0	0	0	0	0	-4.09002	0	-3.25771			97.4067												NaN	NaN	NaN	NaN	NaN	0.6919	NaN
HSA-MIR-618	0	29.5899	28.6482	29.6315	31.5199	32.9843	29.8727		29.5957		31.6694			30.2191	0	0.339296	1.28097	0.29773	-1.5907	-3.05507	0.05649	0	0.3335	0	-1.74015	0	0	-0.28985		79.0427	41.1519	81.3531			96.1601		79.3609						NaN	NaN	NaN	0.4351	3.042	0.324	1.321
HSA-MIR-619	0	0													0	0	0	0	0	0	0	0	0	0	0	0	0	0															NaN	NaN	NaN	NaN	NaN	NaN	NaN
HSA-MIR-620	0	0													0	0	0	0	0	0	0	0	0	0	0	0	0	0															NaN	NaN	NaN	NaN	NaN	NaN	NaN
HSA-MIR-624	0	0													0	0	0	0	0	0	0	0	0	0	0	0	0	0															NaN	NaN	NaN	NaN	NaN	NaN	NaN
HSA-MIR-628-5P	0	0		30.2204	29.7439	32.226	30.6868			30.1757	31.2538		31.1832	30.2699	0	0	0	30.2204	29.7439	32.226	30.6868	0	0	30.1757	31.2538	0	31.1832	30.2699				7.99358e-08	1.11224e-07	1.99065e-08	5.78582e-08			8.24518e-08	3.90554e-08		4.10127e-08	7.72401e-08	NaN	3.239	0.3641	0.8691	NaN	1.661	1.125
HSA-MIR-629*	0	0			30.8132	30.6921	31.8462	34.5869			31.9201				0	0	0	0	30.8132	30.6921	31.8462	34.5869	0	0	31.9201	0	0	0					5.30051e-08	5.76432e-08	2.59032e-08	3.87528e-09			2.46084e-08				NaN	NaN	NaN	1.515	NaN	2.19	1.394
HSA-MIR-630	0	0					34.3231								0	0	0	0	0	0	34.3231	0	0	0	0	0	0	0							4.65296e-09								NaN	NaN	NaN	NaN	NaN	NaN	1
HSA-MIR-635	0	33.1544	32.9714	33.176				33.895		28.5912	33.344				0	33.1544	32.9714	33.176	0	0	0	33.895	0	28.5912	33.344	0	0	0		1.04598e-08	1.18745e-08	1.03045e-08				6.26011e-09		2.47288e-07	9.17176e-09				NaN	22.77	NaN	0.4784	0.9025	NaN	NaN
HSA-MIR-637	0	0	33.2945											34.9587	0	0	33.2945	0	0	0	0	0	0	0	0	0	0	34.9587			9.49224e-09											2.99499e-09	NaN	NaN	NaN	NaN	NaN	NaN	NaN
HSA-MIR-640	0	0													0	0	0	0	0	0	0	0	0	0	0	0	0	0															NaN	NaN	NaN	NaN	NaN	NaN	NaN
HSA-MIR-642A	0	0	32.7786		32.494	32.8025					32.7242	32.705	33.7484		0	0	-1.72433	0	-1.4398	-1.74827	0	0	0	0	-1.66992	-1.65078	-2.69416	0															NaN	NaN	0.3282	1.674	NaN	1.318	NaN
HSA-MIR-643	0	0				32.7518		34.0225							0	0	0	0	0	32.7518	0	34.0225	0	0	0	0	0	0						1.38272e-08		5.73061e-09							NaN	NaN	NaN	NaN	NaN	NaN	NaN
HSA-MIR-645	0	31.9809	32.1803					34.5102							0	31.9809	32.1803	0	0	0	0	34.5102	0	0	0	0	0	0		2.35931e-08	2.05479e-08					4.08705e-09							NaN	NaN	NaN	NaN	3.035	NaN	NaN
HSA-MIR-647	0	0		33.9079	31.88	30.4641	30.0862	30.3869		32.2425	33.5483		31.7156		0	0	0	-4.65047	-2.62254	-1.20665	-0.82879	-1.12953	0	-2.98513	-4.29086	0	-2.45816	0															NaN	1.62	0.5274	0.3712	NaN	0.7919	3.575
HSA-MIR-648	0	31.2049	30.5753	30.6246	29.8311	32.1958	31.1996	30.328	29.195	30.1826	32.8443	31.2523	30.5205	31.0273	0	-2.38213	-1.75249	-1.80182	-1.00829	-3.37302	-2.37678	-1.50521	-0.372246	-1.35983	-4.02152	-2.42952	-1.69775	-2.2045															NaN	3.053	0.5459	0.2733	1.409	1.481	0.747
HSA-MIR-649	0	0					34.7572	32.1732		32.6483	33.872				0	0	0	0	0	0	34.7572	32.1732	0	32.6483	33.872	0	0	0							3.44384e-09	2.06497e-08		1.48554e-08	6.36076e-09				NaN	2.853	NaN	0.692	NaN	NaN	0.3275
HSA-MIR-653	0	0	31.9848						29.7184						0	0	-3.86336	0	0	0	0	0	-1.59695	0	0	0	0	0															NaN	NaN	NaN	NaN	NaN	NaN	NaN
HSA-MIR-654-3P	0	0				33.43		31.8383				32.5154	32.2239		0	0	0	0	0	33.43	0	31.8383	0	0	0	32.5154	32.2239	0						8.64082e-09		2.60447e-08				1.62885e-08	1.99365e-08		NaN	NaN	0.8761	NaN	NaN	NaN	NaN
HSA-MIR-655	0	0							32.603						0	0	0	0	0	0	0	0	32.603	0	0	0	0	0									1.53296e-08						NaN	NaN	NaN	NaN	NaN	NaN	NaN
HSA-MIR-664	0	34.5222	30.3123		29.473	31.8649	29.8917	30.1965	31.1932	34.1571	32.4559	31.1932	29.038	30.2243	0	34.5222	30.3123	0	29.473	31.8649	29.8917	30.1965	31.1932	34.1571	32.4559	31.1932	29.038	30.2243		4.05308e-09	7.50021e-08		1.34198e-07	2.55687e-08	1.00393e-07	8.1271e-08	4.07294e-08	5.22036e-09	1.69748e-08	4.07286e-08	1.8142e-07	7.97249e-08	NaN	0.2599	2.041	0.4787	0.1891	2.54	2.475
HSA-MIR-664*	0	31.2267		34.0987		31.0615	34.8479	32.1638		32.2068	32.1185	31.2543			0	31.2267	0	34.0987	0	31.0615	34.8479	32.1638	0	32.2068	32.1185	31.2543	0	0		3.97948e-08		5.43571e-09		4.46219e-08	3.23398e-09	2.07834e-08		2.01736e-08	2.14478e-08	3.90397e-08			NaN	2.019	NaN	1.216	3.731	NaN	0.1602
HSA-MIR-670	0	0									33.9849				0	0	0	0	0	0	0	0	0	0	33.9849	0	0	0											5.88201e-09				NaN	NaN	NaN	1	NaN	NaN	NaN
HSA-MIR-676*	0	0					31.635					30.333			0	0	0	0	0	0	-2.03828	0	0	0	0	-0.736214	0	0															NaN	NaN	NaN	NaN	NaN	NaN	0.6235
HSA-MIR-7-2*	0	31.9368	30.6674	31.3597	31.6278	28.5959	32.4496	32.9358	31.7458	27.642	32.2884	32.4138	34.1425	31.2731	0	31.9368	30.6674	31.3597	31.6278	28.5959	32.4496	32.9358	31.7458	27.642	32.2884	32.4138	34.1425	31.2731		2.43263e-08	5.86382e-08	3.62897e-08	3.01356e-08	2.4648e-07	1.70487e-08	1.21711e-08	2.77697e-08	4.77448e-07	1.90639e-08	1.74773e-08	5.27324e-09	3.85356e-08	NaN	27.36	0.06828	0.6187	1.306	0.6565	0.4837
HSA-MIR-708*	0	0									32.2302				0	0	0	0	0	0	0	0	0	0	32.2302	0	0	0											1.98496e-08				NaN	NaN	NaN	1	NaN	NaN	NaN
HSA-MIR-711	0	0	29.1175												0	0	29.1175	0	0	0	0	0	0	0	0	0	0	0			1.71696e-07												NaN	NaN	NaN	NaN	NaN	NaN	NaN
HSA-MIR-764	0	0									32.8102				0	0	0	0	0	0	0	0	0	0	32.8102	0	0	0											1.32781e-08				NaN	NaN	NaN	1	NaN	NaN	NaN
HSA-MIR-765	0	30.0013	32.6626	27.9294	27.2728	26.1344	28.4516	28.8358	29.692	31.2556	27.492	30.3456	26.5234	26.6813	0	30.0013	32.6626	27.9294	27.2728	26.1344	28.4516	28.8358	29.692	31.2556	27.492	30.3456	26.5234	26.6813		9.305e-08	1.47084e-08	3.91207e-07	6.16693e-07	1.35756e-06	2.72401e-07	2.08716e-07	1.15298e-07	3.90059e-08	5.29754e-07	7.32943e-08	1.0367e-06	9.29267e-07	NaN	0.3313	1.99	2.549	0.7406	1.992	1.146
HSA-MIR-767-3P	0	32.9114	30.3716				32.6424	30.4666		31.557	31.2019	30.5125	34.3174		0	32.9114	30.3716	0	0	0	32.6424	30.4666	0	31.557	31.2019	30.5125	34.3174	0		1.23787e-08	7.19852e-08				1.49161e-08	6.73968e-08		3.16521e-08	4.04854e-08	6.52886e-08	4.67135e-09		NaN	2.146	0.07158	1.555	0.7866	NaN	0.5008
HSA-MIR-770-5P	0	0	30.6665	31.3372	32.5315	34.654	31.3595	34.3257		33.1239		32.3848	32.0436		0	0	30.6665	31.3372	32.5315	34.654	31.3595	34.3257	0	33.1239	0	32.3848	32.0436	0			5.86785e-08	3.68609e-08	1.61085e-08	3.69932e-09	3.62958e-08	4.64455e-09		1.06833e-08		1.78322e-08	2.25898e-08		NaN	1.428	0.6823	NaN	NaN	0.8186	2.402
HSA-MIR-873	0	0	31.6635					33.2506							0	0	31.6635	0	0	0	0	33.2506	0	0	0	0	0	0			2.93991e-08					9.78518e-09							NaN	NaN	NaN	NaN	NaN	NaN	NaN
HSA-MIR-874	0	0	31.9196		28.0092	28.1903					27.1044				0	0	2.17236	0	6.08276	5.90168	0	0	0	0	6.9876	0	0	0			22.1847		1.47539	1.6727					0.787994				NaN	NaN	NaN	4.673	NaN	1.675	NaN
HSA-MIR-875-3P	0	0	32.444					30.5414		32.4937	31.4445	33.3559	31.0335		0	0	32.444	0	0	0	0	30.5414	0	32.4937	31.4445	33.3559	31.0335	0			1.71154e-08					6.39937e-08		1.6536e-08	3.42177e-08	9.09636e-09	4.54982e-08		NaN	1.34	0.8331	1.571	NaN	NaN	NaN
HSA-MIR-876-3P	0	0													0	0	0	0	0	0	0	0	0	0	0	0	0	0															NaN	NaN	NaN	NaN	NaN	NaN	NaN
HSA-MIR-876-5P	0	0	29.7356						29.8351			30.1535			0	0	29.7356	0	0	0	0	0	29.8351	0	0	30.1535	0	0			1.11864e-07						1.0441e-07			8.37298e-08			NaN	NaN	NaN	NaN	NaN	NaN	NaN
HSA-MIR-885-3P	0	34.0667													0	-2.40294	0	0	0	0	0	0	0	0	0	0	0	0															NaN	NaN	NaN	NaN	1	NaN	NaN
HSA-MIR-887	0	31.4438	30.6788	29.8495	28.55	30.4853	29.9424	29.3812	30.2112	29.4304	31.2332	30.3509	28.6739	27.9862	0	31.4438	30.6788	29.8495	28.55	30.4853	29.9424	29.3812	30.2112	29.4304	31.2332	30.3509	28.6739	27.9862		3.42363e-08	5.81767e-08	1.03373e-07	2.54452e-07	6.65298e-08	9.69258e-08	1.43013e-07	8.04516e-08	1.38223e-07	3.96151e-08	7.30235e-08	2.33502e-07	3.76112e-07	NaN	2.604	0.994	0.4227	0.6044	1.822	0.9041
HSA-MIR-888	0	0			30.0022	29.116	30.9924				30.6871				0	0	0	0	-0.6566	0.2296	-1.64675	0	0	0	-1.34146	0	0	0						85.2871									NaN	NaN	NaN	1.044	NaN	1.127	0.7386
HSA-MIR-888*	0	0	30.0989			34.4243		33.7639		31.0039		34.1983			0	0	30.0989	0	0	34.4243	0	33.7639	0	31.0039	0	34.1983	0	0			8.69605e-08			4.33779e-09		6.85572e-09		4.64391e-08		5.07321e-09			NaN	6.904	NaN	NaN	NaN	NaN	NaN
HSA-MIR-889	0	0				32.0931			31.517					30.6286	0	0	0	0	0	32.0931	0	0	31.517	0	0	0	0	30.6286						2.18282e-08			3.25408e-08					6.02375e-08	NaN	NaN	NaN	NaN	NaN	NaN	NaN
HSA-MIR-890	0	0													0	0	0	0	0	0	0	0	0	0	0	0	0	0															NaN	NaN	NaN	NaN	NaN	NaN	NaN
HSA-MIR-891B	0	31.3226							29.9694						0	31.3226	0	0	0	0	0	0	29.9694	0	0	0	0	0		3.7236e-08							9.51287e-08						NaN	NaN	NaN	NaN	0.5661	NaN	NaN
HSA-MIR-892A	0	0	32.9281									32.124		32.4954	0	0	32.9281	0	0	0	0	0	0	0	0	32.124	0	32.4954			1.22365e-08									2.13659e-08		1.65161e-08	NaN	NaN	NaN	NaN	NaN	NaN	NaN
HSA-MIR-892B	0	30.3422	29.7935				29.4432			31.7807		32.9633	30.0912		0	30.3422	29.7935	0	0	0	29.4432	0	0	31.7807	0	32.9633	30.0912	0		7.34661e-08	1.07465e-07				1.36994e-07			2.71064e-08		1.19414e-08	8.74289e-08		NaN	0.8748	0.6376	NaN	2.222	NaN	2.189
HSA-MIR-9	0	0			29.8323	34.1257									0	0	0	0	29.8323	34.1257	0	0	0	0	0	0	0	0					1.0461e-07	5.335e-09									NaN	NaN	NaN	NaN	NaN	5.956	NaN
HSA-MIR-920	0	0	31.1499		29.6226										0	0	31.1499	0	29.6226	0	0	0	0	0	0	0	0	0			4.19715e-08		1.20975e-07										NaN	NaN	NaN	NaN	NaN	1.432	NaN
HSA-MIR-921	0	0													0	0	0	0	0	0	0	0	0	0	0	0	0	0															NaN	NaN	NaN	NaN	NaN	NaN	NaN
HSA-MIR-92A-1*	0	0			32.0362		29.7354	34.2565			32.0862	31.7528		34.4607	0	0	0	0	32.0362	0	29.7354	34.2565	0	0	32.0862	31.7528	0	34.4607					2.27066e-08		1.11882e-07	4.87259e-09			2.19319e-08	2.76355e-08		4.22968e-09	NaN	NaN	NaN	1.538	NaN	1.069	6.857
HSA-MIR-92A-2*	0	0													0	0	0	0	0	0	0	0	0	0	0	0	0	0															NaN	NaN	NaN	NaN	NaN	NaN	NaN
HSA-MIR-93*	0	0	27.8134	29.7259	28.0998	28.9599	30.5241	30.4974	32.2865		29.2198	30.4317	28.9981	30.9751	0	0	27.8134	29.7259	28.0998	28.9599	30.5241	30.4974	32.2865	0	29.2198	30.4317	28.9981	30.9751			4.23967e-07	1.12622e-07	3.47637e-07	1.91518e-07	6.47653e-08	6.59737e-08	1.90897e-08		1.59941e-07	6.90471e-08	1.86511e-07	4.73768e-08	NaN	NaN	0.8373	1.8	NaN	2.626	0.6371
HSA-MIR-933	0	0							33.7212						0	0	0	0	0	0	0	0	33.7212	0	0	0	0	0									7.06142e-09						NaN	NaN	NaN	NaN	NaN	NaN	NaN
HSA-MIR-937	0	29.2089	26.8119	28.3774	25.38	24.7715	27.8491	27.8037	28.7386	28.4817	26.1959	29.1057	25.9829	25.7289	0	1.88616	4.28316	2.71765	5.71503	6.32359	3.24596	3.29135	2.35646	2.61334	4.8992	1.98932	5.11211	5.36612		27.0526	5.13619	15.2022	1.90373	1.24856	10.5407	10.2142	19.527	16.3421	3.35116	25.1858	2.89136	2.42459	NaN	0.8298	1.06	2.292	0.4697	2.708	0.637
HSA-MIR-938	0	0													0	0	0	0	0	0	0	0	0	0	0	0	0	0															NaN	NaN	NaN	NaN	NaN	NaN	NaN
HSA-MIR-944	0	0			30.8308										0	0	0	0	30.8308	0	0	0	0	0	0	0	0	0					5.23606e-08										NaN	NaN	NaN	NaN	NaN	1	NaN
HSA-MIR-95	0	0	31.4064	34.5361	30.0135	31.1854					29.5294	32.5568			0	0	31.4064	34.5361	30.0135	31.1854	0	0	0	0	29.5294	32.5568	0	0			3.51343e-08	4.01416e-09	9.22668e-08	4.09516e-08					1.29054e-07	1.58281e-08			NaN	NaN	NaN	4.895	NaN	2.349	NaN
RNU12	0	30.1349		28.0484	27.5138	28.7849		29.3954	29.6205	28.8693	29.2398	27.9403	26.4461	27.59	0	30.1349	0	28.0484	27.5138	28.7849	0	29.3954	29.6205	28.8693	29.2398	27.9403	26.4461	27.59		8.48173e-08		3.60236e-07	5.21809e-07	2.16211e-07		1.41611e-07	1.21156e-07	2.03921e-07	1.5774e-07	3.8826e-07	1.09374e-06	4.94967e-07	NaN	1.499	1.817	0.657	0.5844	1.459	NaN
SCARNA5	0	0			29.0243		29.5629								0	0	0	0	29.0243	0	29.5629	0	0	0	0	0	0	0					1.8315e-07		1.26089e-07								NaN	NaN	NaN	NaN	NaN	1.056	0.9469
SNORA16A	0	0				29.2097	29.4864	29.6415				29.695	29.0598	29.4066	0	0	0	0	0	29.2097	29.4864	29.6415	0	0	0	29.695	29.0598	29.4066						1.61068e-07	1.32953e-07	1.19402e-07				1.1506e-07	1.78708e-07	1.40515e-07	NaN	NaN	0.8199	NaN	NaN	NaN	1.337
SNORA44	0	0				29.8037		31.0566					30.5132	29.7851	0	0	0	0	0	29.8037	0	31.0566	0	0	0	0	30.5132	29.7851						1.06705e-07		4.47759e-08					6.52565e-08	1.08091e-07	NaN	NaN	0.6565	NaN	NaN	NaN	NaN
SNORA61	0	0			28.0974	28.7044							28.0166		0	0	0	0	28.0974	28.7044	0	0	0	0	0	0	28.0166	0					3.48204e-07	2.28623e-07							3.68257e-07		NaN	NaN	1.029	NaN	NaN	1.637	NaN
SNORD99	0	0									29.4725		31.8728		0	0	0	0	0	0	0	0	0	0	29.4725	0	31.8728	0											1.34246e-07		2.54291e-08		NaN	NaN	0.2749	3.638	NaN	NaN	NaN
HSA-MIR-451	18.6245	17.8956	16.1222	18.1933	17.2281	15.628	16.1227	17.1884	18.6536	18.5451	18.4046	15.5601	15.1091	18.8199	18.6245	17.8956	16.1222	18.1933	17.2281	15.628	16.1227	17.1884	18.6536	18.5451	18.4046	15.5601	15.1091	18.8199	0.000247436	0.000410086	0.00140199	0.000333623	0.000651362	0.00197464	0.00140149	0.000669535	0.000242496	0.000261429	0.000288176	0.00206981	0.00282939	0.000216101	0.5397	0.791	1.934	0.4938	1.163	0.7492	2.099
HSA-MIR-16	19.4536	19.3003	18.693	19.6685	18.2248	17.2536	17.3228	18.1979	20.597	20.6352	20.2581	17.3782	16.6651	19.9398	12.9667	13.1201	13.7274	12.7519	14.1956	15.1667	15.0975	14.2225	11.8234	11.7852	12.1622	15.0421	15.7553	12.4806	0.0124917	0.0112318	0.00737303	0.0144981	0.00532972	0.00271867	0.00285229	0.00523115	0.0275941	0.0283333	0.0218174	0.00296392	0.00180794	0.0174976	0.8804	0.5384	1.907	0.3961	1.273	1.088	2.648
HSA-MIR-1274B	21.3202	22.5884	19.5451	24.6409	20.663	22.876	21.7408	20.2707	27.1898	22.4386	23.8734	23.2513	20.5983	22.2629	21.3202	22.5884	19.5451	24.6409	20.663	22.876	21.7408	20.2707	27.1898	22.4386	23.8734	23.2513	20.5983	22.2629	3.81922e-05	1.58573e-05	0.000130722	3.82247e-06	6.02314e-05	1.29904e-05	2.85343e-05	7.90506e-05	6.53199e-07	1.75915e-05	6.5071e-06	1.00149e-05	6.2995e-05	1.98698e-05	2.824	1.804	1.46	0.378	1.524	2.348	1.449
HSA-MIR-486-5P	21.4454	21.8563	21.1873	21.4385	21.547	20.5071	20.4307	21.2719	22.1449	23.8041	23.6236	20.4376	20.0927	23.3707	21.4454	21.8563	21.1873	21.4385	21.547	20.5071	20.4307	21.2719	22.1449	23.8041	23.6236	20.4376	20.0927	23.3707	3.50188e-05	2.63397e-05	4.18784e-05	3.51869e-05	3.26358e-05	6.71034e-05	7.07513e-05	3.94935e-05	2.15643e-05	6.82725e-06	7.73738e-06	7.04176e-05	8.94292e-05	9.21992e-06	1.57	0.4246	1.257	0.2726	1.535	0.7717	2.179
HSA-MIR-92A	22.1265	22.7792	21.6939	21.8116	22.5008	21.3831	21.2978	21.8691	22.9094	24.7139	24.1474	21.5368	20.8164	23.6187	22.1265	22.7792	21.6939	21.8116	22.5008	21.3831	21.2978	21.8691	22.9094	24.7139	24.1474	21.5368	20.8164	23.6187	2.18404e-05	1.38924e-05	2.9478e-05	2.7168e-05	1.68489e-05	3.65641e-05	3.87914e-05	2.6107e-05	1.26939e-05	3.63402e-06	5.3816e-06	3.28681e-05	5.41555e-05	7.76333e-06	1.61	0.3717	1.252	0.3118	1.331	0.6552	1.964
HSA-MIR-1260	22.7424	23.3745	20.8122	26.1166	22.26	23.8129	22.5894	21.5519	27.1857	23.4205	24.365	23.8474	21.6408	22.8206	22.7424	23.3745	20.8122	26.1166	22.26	23.8129	22.5894	21.5519	27.1857	23.4205	24.365	23.8474	21.6408	22.8206	1.42517e-05	9.19568e-06	5.43133e-05	1.37445e-06	1.99102e-05	6.78602e-06	1.58452e-05	3.25267e-05	6.55081e-07	8.90691e-06	4.62815e-06	6.62525e-06	3.05825e-05	1.34996e-05	2.034	1.763	1.368	0.5189	1.706	1.498	1.553
HSA-MIR-3130-3P	23.2681	24.0382	24.0231	23.882	24.0723	24.0527	24.1798	23.8624	23.9286	23.5542	23.6427	24.3864	24.1142	23.6415	-1.08469	-1.85475	-1.83969	-1.69856	-1.88889	-1.86927	-1.9964	-1.67895	-1.7452	-1.37074	-1.4593	-2.20299	-1.93073	-1.45803															2.11	2.401	0.3679	1.279	1.608	0.6373	0.7703
HSA-MIR-15A	23.3772	23.7107	23.8896	23.2178	21.9071	21.3524	21.5651	21.9452	24.6857	25.0877	24.0232	22.1188	20.5952	23.5927	23.3772	23.7107	23.8896	23.2178	21.9071	21.3524	21.5651	21.9452	24.6857	25.0877	24.0232	22.1188	20.5952	23.5927	9.17817e-06	7.28393e-06	6.43435e-06	1.02508e-05	2.54274e-05	3.73494e-05	3.22296e-05	2.47656e-05	3.70554e-06	2.8045e-06	5.86534e-06	2.19572e-05	6.31287e-05	7.90494e-06	0.9988	0.4234	2.154	0.5015	1.03	1.459	2.409
HSA-LET-7B	23.378	23.914	23.5277	23.4623	23.3682	22.0967	22.8573	22.9943	24.3473	25.1943	24.7822	22.4016	21.1881	23.9627	8.29629	7.76026	8.14658	8.21202	8.30603	9.57762	8.81694	8.67996	7.32692	6.47999	6.89205	9.27271	10.4862	7.71156	0.318103	0.461242	0.352886	0.337237	0.315962	0.130872	0.221736	0.243821	0.62284	1.12028	0.841948	0.161672	0.0697165	0.477077	1.371	0.54	1.961	0.407	1.229	0.7279	1.351
HSA-MIR-720	23.3878	23.451	20.4653	26.282	21.8645	24.1186	22.8873	21.4025	29.2929	24.2399	25.0044	24.1791	21.723	23.6193	9.73899	9.67585	12.6616	6.84483	11.2623	9.00824	10.2395	11.7243	3.83391	8.88691	8.12245	8.9477	11.4039	9.50756	0.117023	0.122258	0.0154345	0.869966	0.0407104	0.194201	0.0827172	0.0295557	7.0126	0.211239	0.358839	0.202523	0.0369058	0.137385	1.697	1.304	1.686	0.4347	2.111	2.572	1.649
HSA-MIR-19B	23.398	22.9939	22.4964	24.2929	21.0578	20.724	21.0393	21.4779	24.8148	24.1088	22.9916	20.9759	20.3876	22.9898	11.3749	11.7791	12.2765	10.48	13.7151	14.0489	13.7336	13.295	9.95815	10.6641	11.7813	13.797	14.3853	11.7831	0.037655	0.0284543	0.0201563	0.0700183	0.00743607	0.00590015	0.00734133	0.00994961	0.100531	0.0616296	0.0284107	0.0070256	0.00467294	0.0283741	0.6852	0.5808	1.731	0.7136	1.179	1.83	2.414
HSA-MIR-762	23.8126	23.613	24.3168	23.3865	20.5184	20.5177	23.854	23.0079	24.9509	25.3581	23.525	23.8414	21.7411	23.1579	7.42014	7.61975	6.91595	7.84629	10.7143	10.715	7.37876	8.22489	6.28181	5.87464	7.70776	7.39133	9.49161	8.07484	0.583869	0.508426	0.828119	0.434543	0.0595201	0.0594908	0.60086	0.334243	1.28525	1.70435	0.478337	0.595647	0.138913	0.370879	0.9245	0.4393	1.218	0.8867	1.38	4.783	0.617
HSA-MIR-223	23.9511	24.1523	23.1173	22.0586	19.1432	18.2156	22.2843	21.0796	23.3062	23.6323	19.2056	22.404	20.0994	18.996	3.7675	3.56637	4.60131	5.66007	8.5754	9.5031	5.43438	6.63901	4.41249	4.08632	8.51309	5.31462	7.6193	8.72268	7.34292	8.44143	4.11973	1.97765	0.262149	0.137811	2.31254	1.00337	4.69579	5.88703	0.273719	2.5127	0.508584	0.236708	0.2565	0.4438	1.161	5.407	0.29	3.789	0.5594
HSA-MIR-25	24.1198	23.9764	23.1498	24.0002	23.5605	22.3754	22.6114	23.7559	24.6293	25.6549	25.0172	22.5438	22.2585	25.126	24.1198	23.9764	23.1498	24.0002	23.5605	22.3754	22.6114	23.7559	24.6293	25.6549	25.0172	22.5438	22.2585	25.126	5.48569e-06	6.05882e-06	1.07456e-05	5.95951e-06	8.08302e-06	1.83794e-05	1.56063e-05	7.05935e-06	3.85349e-06	1.89275e-06	2.94501e-06	1.63547e-05	1.99306e-05	2.73107e-06	1.066	0.5102	1.214	0.4497	1.53	0.8284	2.083
HSA-MIR-19A	24.1868	24.0647	23.7499	25.055	22.1255	21.5023	22.0569	22.444	25.8508	24.746	23.6158	22.0711	21.2232	23.3538	5.66511	5.78716	6.10201	4.79689	7.72639	8.34956	7.79499	7.40793	4.00111	5.10594	6.23612	7.78074	8.62874	6.49806	1.97075	1.81088	1.45583	3.59743	0.472199	0.306572	0.450271	0.588831	6.24519	2.90375	1.3266	0.454741	0.252633	1.10634	0.7292	0.6865	1.783	0.8511	1.031	1.605	2.192
HSA-MIR-195	24.4675	24.6313	24.113	24.1376	23.6744	22.0634	22.7431	22.7879	24.7372	25.5025	24.0314	22.9064	20.6679	23.6962	5.52539	5.36152	5.87992	5.85525	6.31843	7.92948	7.24982	7.20497	5.25568	4.49035	5.9615	7.08647	9.32501	6.29669	2.17116	2.43232	1.69812	1.72741	1.25304	0.410194	0.657034	0.67778	2.61748	4.44909	1.60476	0.735802	0.155917	1.27206	0.7358	0.4981	3.212	0.7822	0.8538	0.6724	1.67
HSA-MIR-22	24.6428	24.5746	23.7705	25.0359	23.1672	21.8935	23.017	22.8824	26.9577	26.0209	24.7008	22.8526	22.3031	24.2136	5.80636	5.8746	6.67864	5.41321	7.28194	8.55567	7.43218	7.56672	3.49147	4.42824	5.74834	7.59655	8.14602	6.23553	1.78695	1.70439	0.976178	2.34672	0.642566	0.265758	0.579016	0.527461	8.89125	4.6448	1.86028	0.516667	0.353024	1.32715	0.8715	0.4651	1.383	0.6578	1.188	1.278	1.847
HSA-MIR-1260B	24.6848	24.9136	22.3412	26.1437	24.1514	24.1543	24.1867	23.3638	28.1557	25.4791	24.8485	25.4838	23.4947	23.4385	9.17194	8.94314	11.5156	7.71301	9.70537	9.70241	9.67002	10.493	5.70105	8.37768	9.00824	8.37291	10.362	10.4182	0.173369	0.203163	0.034156	0.476597	0.119782	0.120028	0.122753	0.06939	1.92226	0.300653	0.1942	0.301649	0.0759836	0.0730811	1.309	1.047	0.9364	0.9184	1.452	0.9994	1.27
HSA-MIR-185	24.7017	24.503	24.465	26.7039	23.9715	23.0536	23.7016	24.2366	27.3778	26.3389	26.2686	23.1638	22.9014	25.7427	10.0635	10.2622	10.3003	8.06127	10.7937	11.7116	11.0636	10.5286	7.38739	8.42636	8.49657	11.6014	11.8638	9.02248	0.0934487	0.0814256	0.0793071	0.374382	0.056333	0.0298167	0.0467226	0.0676959	0.597273	0.290678	0.27687	0.032183	0.0268306	0.192292	1.449	0.6464	1.582	0.3844	2.162	1.268	1.991
HSA-MIR-557	24.7778	25.5539	25.6974	26.1512	25.3697	24.8987	26.1125	25.5485	25.9339	25.413	25.0594	25.968	25.3759	25.0511	24.7778	25.5539	25.6974	26.1512	25.3697	24.8987	26.1125	25.5485	25.9339	25.413	25.0594	25.968	25.3759	25.0511	3.47657e-06	2.03005e-06	1.83782e-06	1.34183e-06	2.30647e-06	3.19706e-06	1.37829e-06	2.03765e-06	1.56001e-06	2.23829e-06	2.85996e-06	1.52353e-06	2.29666e-06	2.87654e-06	2.231	1.993	0.4621	1.442	1.694	0.7808	0.6076
HSA-MIR-4286	24.9284	24.7781	22.0678	27.7005	23.6124	24.1102	24.504	23.7729	29.2298	25.8305	25.9085	25.7168	23.8305	23.8497	24.9284	24.7781	22.0678	27.7005	23.6124	24.1102	24.504	23.7729	29.2298	25.8305	25.9085	25.7168	23.8305	23.8497	3.13192e-06	3.4757e-06	2.27468e-05	4.58475e-07	7.79735e-06	5.52228e-06	4.20299e-06	6.97675e-06	1.58833e-07	1.67593e-06	1.58773e-06	1.81327e-06	6.70336e-06	6.61479e-06	1.416	1.051	0.9503	0.5642	2.043	1.86	1.306
HSA-LET-7A	25.013	26.3839	25.3099	25.0546	25.039	24.2946	25.4534	24.1178	26.4137	27.5175	26.1483	25.4563	22.3343	24.9485	7.20314	5.83221	6.90628	7.16157	7.17713	7.92156	6.76273	8.09839	5.80241	4.69867	6.06783	6.75983	9.88188	7.26768	0.678641	1.75521	0.833686	0.698478	0.690985	0.412451	0.920906	0.364873	1.79185	3.85087	1.49074	0.922759	0.105988	0.648949	1.6	0.3911	3.211	0.5723	0.8041	0.8287	0.8098
HSA-MIR-93	25.0452	25.579	24.9823	26.0085	24.9665	23.4567	24.2583	25.1409	27.2307	27.2069	26.3115	23.4984	23.6387	26.0487	5.02215	4.48834	5.08501	4.05887	5.10081	6.61063	5.80908	4.92647	2.83663	2.86043	3.75582	6.56894	6.42863	4.01865	3.0774	4.45528	2.94617	6.00008	2.91408	1.02329	1.78357	3.28839	13.9987	13.7697	7.4026	1.0533	1.16088	6.1697	1.556	0.4824	1.293	0.5082	1.397	0.8666	1.844
HSA-MIR-1233	25.091	25.6224	24.748	25.3213	25.1169	25.3042	24.9121	25.0956	25.5703	24.4729	25.2647	24.8478	24.8359	25.3964	-1.30509	-1.83648	-0.962147	-1.53548	-1.33099	-1.51829	-1.12627	-1.30969	-1.78443	-0.686997	-1.47881	-1.06197	-1.04998	-1.61055															1.381	2.94	0.5165	0.9618	1.242	0.7152	1.073
HSA-MIR-144	25.1905	24.9934	23.7102	27.2911	22.8877	22.1719	22.714	22.9172	28.3845	25.0595	24.2816	22.5681	21.6025	25.6291	25.1905	24.9934	23.7102	27.2911	22.8877	22.1719	22.714	22.9172	28.3845	25.0595	24.2816	22.5681	21.6025	25.6291	2.61154e-06	2.9939e-06	7.28659e-06	6.08912e-07	1.28858e-05	2.11633e-05	1.45344e-05	1.26249e-05	2.85378e-07	2.85978e-06	4.90348e-06	1.60811e-05	3.14042e-05	1.92692e-06	0.7044	1.07	2.655	1.039	1.05	1.833	2.693
HSA-MIR-20A	25.3921	24.8844	24.9005	25.6047	24.5254	22.678	23.9624	24.1147	26.3992	26.5577	25.6838	23.011	22.8107	24.9589	25.3921	24.8844	24.9005	25.6047	24.5254	22.678	23.9624	24.1147	26.3992	26.5577	25.6838	23.011	22.8107	24.9589	2.27101e-06	3.2289e-06	3.19298e-06	1.95981e-06	4.14104e-06	1.49016e-05	6.11802e-06	5.50501e-06	1.12989e-06	1.01236e-06	1.85528e-06	1.18308e-05	1.35927e-05	3.06633e-06	0.8278	0.5119	1.553	0.5314	1.53	0.7961	1.532
HSA-MIR-320C	25.4237	26.5036	27.8975	27.1564	23.3449	24.5494	25.4304	24.1266	27.8465	28.3013	26.9835	26.1791	23.2862	26.9831	6.81506	5.73523	4.34123	5.0824	8.89385	7.68943	6.80836	8.11222	4.39232	3.93745	5.25529	6.0597	8.95259	5.25572	0.888098	1.87725	4.93353	2.95151	0.210224	0.484451	0.892232	0.361391	4.76188	6.52692	2.61817	1.49916	0.201837	2.61739	2.027	0.3826	2.796	0.5402	1.246	4.516	1.386
HSA-MIR-150	25.4482	27.3809	25.7216	23.8542	22.1867	21.2818	25.3253	23.1631	24.5841	27.6138	25.0132	26.3873	22.9363	23.1597	25.4482	27.3809	25.7216	23.8542	22.1867	21.2818	25.3253	23.1631	24.5841	27.6138	25.0132	26.3873	22.9363	23.1597	2.18433e-06	5.72189e-07	1.80727e-06	6.59437e-06	2.09482e-05	3.92237e-05	2.37865e-06	1.06466e-05	3.97602e-06	4.86875e-07	2.95309e-06	1.13932e-06	1.24589e-05	1.06716e-05	0.7419	0.2294	1.326	0.7881	0.2526	3.752	0.5549
HSA-MIR-21	25.468	25.1494	24.6373	23.9509	22.749	22.0273	23.4676	23.2162	24.3698	25.1873	23.8905	23.6815	22.3821	23.6162	-0.0564686	0.262116	0.774201	1.46056	2.66252	3.38421	1.94392	2.19524	1.04166	0.224151	1.52096	1.73	3.02938	1.79533		83.3864	58.4712	36.3352	15.7943	9.57747	25.9909	21.8357	48.5768	85.6098	34.8454	30.1452	12.248	28.8105	0.4403	0.7419	1.172	1.032	0.7137	1.529	1.21
HSA-MIR-126*	25.6583	24.9153	24.6911	24.8	24.1336	23.4616	23.6535	23.5819	24.8442	25.3531	25.065	23.67	22.8959	23.9058	25.6583	24.9153	24.6911	24.8	24.1336	23.4616	23.6535	23.5819	24.8442	25.3531	25.065	23.67	22.8959	23.9058	1.88835e-06	3.16046e-06	3.69188e-06	3.42329e-06	5.43317e-06	8.65645e-06	7.57836e-06	7.96423e-06	3.32003e-06	2.33316e-06	2.84894e-06	7.49249e-06	1.28125e-05	6.36286e-06	0.5413	0.9278	1.151	0.6417	1.178	0.8214	1.492
HSA-MIR-26B	25.7817	26.8311	25.2167	25.7589	24.8742	23.3212	25.6586	24.2	25.8843	26.5206	25.6577	24.5177	23.1438	24.5381	5.42695	4.37749	5.99197	5.44972	6.33439	7.8874	5.55005	7.00863	5.32429	4.68797	5.55097	6.69096	8.06479	6.67048	2.32447	4.81109	1.57122	2.28807	1.23925	0.422333	2.13436	0.776589	2.4959	3.87953	2.133	0.967875	0.373469	0.981712	0.8684	0.7218	1.694	0.7436	0.5454	0.8591	0.6496
HSA-MIR-106A	25.8054	25.6084	25.2086	27.2392	25.1085	23.5509	24.6683	24.9123	28.4312	27.2051	26.5334	23.7477	23.5038	25.6085	25.8054	25.6084	25.2086	27.2392	25.1085	23.5509	24.6683	24.9123	28.4312	27.2051	26.5334	23.7477	23.5038	25.6085	1.70535e-06	1.95485e-06	2.57906e-06	6.31211e-07	2.76436e-06	8.13744e-06	3.7505e-06	3.16697e-06	2.76286e-07	6.46326e-07	1.02957e-06	7.09973e-06	8.40737e-06	1.95471e-06	1.107	0.5818	1.71	0.5249	1.649	0.946	1.671
HSA-MIR-106B	25.9236	26.849	25.9311	28.9471	25.5403	23.783	25.7103	25.6275	28.6613	26.7232	26.3015	24.7013	24.0687	26.0101	25.9236	26.849	25.9311	28.9471	25.5403	23.783	25.7103	25.6275	28.6613	26.7232	26.3015	24.7013	24.0687	26.0101	1.57116e-06	8.27262e-07	1.563e-06	1.93222e-07	2.04932e-06	6.92793e-06	1.82151e-06	1.92911e-06	2.35548e-07	9.02623e-07	1.2091e-06	3.66582e-06	5.68313e-06	1.47967e-06	1.489	1.186	1.688	0.9002	1.019	1.024	1.185
HSA-MIR-30E	25.937	25.9348	24.6465	26.4833	24.3668	23.0701	24.3099	24.8369	27.6393	26.9735	25.1593	24.2756	23.4565	24.6785	2.6884	2.69068	3.97892	2.14212	4.25861	5.5553	4.3155	3.78854	0.986112	1.65191	3.46611	4.3498	5.16897	3.94691	15.5135	15.489	6.34198	22.6546	5.22432	2.12661	5.02232	7.23661	50.4836	31.8218	9.04891	4.90432	2.77961	6.48427	0.7745	0.5238	1.355	1.043	1.008	1.213	1.643
HSA-MIR-542-5P	25.9688	26.3135	30.8306	30.7391	29.7098	25.9124	27.1163	28.8806	28.1082	27.8733	23.1955	28.5737	23.0964	22.676	-0.789148	-1.13377	-5.65093	-5.55942	-4.53011	-0.732753	-1.93659	-3.70092	-2.92851	-2.69363	1.98422	-3.39402	2.08333	2.50368											25.275		23.597	17.6327	2.917	1.081	6.695	15.67	2.986	0.115	0.9043
HSA-MIR-4314	25.9896	0	28.493	27.69	27.3151	27.2037			29.8085					26.9791	25.9896	0	28.493	27.69	27.3151	27.2037	0	0	29.8085	0	0	0	0	26.9791	1.50094e-06		2.64694e-07	4.61827e-07	5.98874e-07	6.46949e-07			1.06356e-07					7.55956e-07	4.271	NaN	NaN	NaN	NaN	0.8987	NaN
HSA-MIR-17	26.0081	26.2352	25.9422	26.3146	25.5097	24.1985	25.3352	25.3873	26.8207	26.7956	26.1931	24.4043	24.0944	25.9117	0.608521	0.38142	0.674443	0.302083	1.107	2.41817	1.2814	1.22931	-0.204057	-0.178987	0.423593	2.21237	2.52226	0.704923	65.5869	76.7682	62.6574	81.108	46.4257	18.7093	41.1395	42.652			74.5565	21.5779	17.407	61.3475	1.063	0.854	1.255	0.7345	1.18	0.7917	1.163
HSA-LET-7F	26.066	27.4646	26.2326	26.4008	26.2615	25.7176	26.6281	25.1724	28.0391	28.5092	27.3655	27.1845	23.1291	25.852	26.066	27.4646	26.2326	26.4008	26.2615	25.7176	26.6281	25.1724	28.0391	28.5092	27.3655	27.1845	23.1291	25.852	1.42349e-06	5.39929e-07	1.26826e-06	1.12866e-06	1.24309e-06	1.81224e-06	9.64147e-07	2.64448e-06	3.62561e-07	2.61736e-07	5.78306e-07	6.5563e-07	1.09003e-05	1.65113e-06	1.749	0.446	4.197	0.5582	0.8622	0.8054	0.8135
HSA-MIR-30D	26.1068	26.7344	24.9677	26.3837	24.7883	24.1477	24.8346	25.3192	27.4206	26.972	26.4129	24.6028	24.2329	24.9662	3.38123	2.75371	4.5204	3.10432	4.6998	5.3404	4.65345	4.16892	2.06743	2.5161	3.0752	4.88525	5.25521	4.52188	9.59731	14.8269	4.35736	11.628	3.84785	2.46819	3.97348	5.55941	23.8584	17.4814	11.8651	3.3837	2.61832	4.35289	0.9323	0.71	1.071	0.5925	0.7844	1.226	1.547
HSA-LET-7G	26.1461	26.5597	25.7574	25.7955	25.1206	24.1153	26.3809	25.1263	27.0003	27.7996	26.6431	25.1466	23.4479	25.5821	2.72647	2.31287	3.1151	3.07702	3.75193	4.75722	2.49168	3.74624	1.87228	1.07298	2.22943	3.7259	5.42461	3.29045	15.1096	20.126	11.5415	11.8502	7.42262	3.69773	17.7799	7.45195	27.3142	47.5337	21.3243	7.55776	2.32825	10.2206	1.039	0.458	2.113	0.5783	1.014	1.115	0.6062
HSA-MIR-140-3P	26.1786	26.7374	25.2974	28.8207	24.4438	24.354	24.3529	24.7473	28.846	27.4949	26.8086	24.4655	23.5253	26.7247	26.1786	26.7374	25.2974	28.8207	24.4438	24.354	24.3529	24.7473	28.846	27.4949	26.8086	24.4655	23.5253	26.7247	1.31662e-06	8.93805e-07	2.42515e-06	2.10912e-07	4.38211e-06	4.66363e-06	4.66722e-06	3.5508e-06	2.07247e-07	5.28687e-07	8.50784e-07	4.31684e-06	8.28278e-06	9.01691e-07	1.131	0.63	2.23	0.5742	0.998	1.985	2.754
HSA-MIR-142-3P	26.2091	26.3839	25.2346	28.0784	23.5498	23.1876	24.4689	22.8394	28.2425	25.8466	24.0471	25.0043	21.5721	23.1813	26.2091	26.3839	25.2346	28.0784	23.5498	23.1876	24.4689	22.8394	28.2425	25.8466	24.0471	25.0043	21.5721	23.1813	1.28903e-06	1.14197e-06	2.53298e-06	3.52815e-07	8.14336e-06	1.04674e-05	4.30665e-06	1.3325e-05	3.14893e-07	1.65725e-06	5.76881e-06	2.97145e-06	3.20736e-05	1.05134e-05	0.5282	0.942	4.119	1.857	0.6082	1.76	1.212
HSA-MIR-1972	26.2479	0	26.5922	27.6248			25.8559	25.7979	29.8057	26.0689		26.5867	25.6662	25.9081	26.2479	0	26.5922	27.6248	0	0	25.8559	25.7979	29.8057	26.0689	0	26.5867	25.6662	25.9081	1.25489e-06		9.88474e-07	4.83174e-07			1.64658e-06	1.71423e-06	1.06556e-07	1.42063e-06		9.92236e-07	1.87798e-06	1.58807e-06	1.646	2.586	0.7724	NaN	NaN	NaN	1.484
HSA-LET-7I	26.381	26.3045	25.9874	26.4888	25.7245	24.3544	25.3531	25.2997	27.236	27.1981	27.4311	25.3317	23.5786	25.8006	2.18219	2.25867	2.57581	2.07435	2.83867	4.20874	3.21005	3.26347	1.32722	1.36506	1.13213	3.23146	4.98459	2.76257	22.034	20.8964	16.7728	23.7443	13.979	5.40808	10.8064	10.4135	39.8536	38.8219	45.6242	10.6472	3.15856	14.7361	0.9671	0.7615	2.115	0.367	1.326	0.804	1.354
HSA-MIR-425	26.3928	26.6087	25.1622	26.873	25.6647	24.5987	24.963	25.5992	28.1346	27.9146	26.2843	25.09	24.0302	26.2849	3.01622	2.80029	4.24681	2.53604	3.74427	4.81032	4.44605	3.80986	1.27444	1.49443	3.1247	4.31906	5.37879	3.12409	12.3603	14.3559	5.26723	17.2415	7.46211	3.56409	4.58781	7.13046	41.3385	35.4921	11.4649	5.00994	2.40338	11.4698	1.015	0.4901	1.635	0.8594	1.135	0.8862	1.877
HSA-MIR-142-5P	26.41	27.1144	25.627	27.4793	23.2313	22.8387	25.2151	24.454	28.6927	26.9314	24.3962	25.2644	23.391	24.1817	3.63381	2.92949	4.41686	2.56458	6.81254	7.20511	4.82879	5.58983	1.35114	3.11241	5.64766	4.77947	6.65285	5.86213	8.0559	13.1261	4.68159	16.9038	0.889655	0.677714	3.51876	2.07632	39.1983	11.563	1.99474	3.64113	0.993786	1.71919	0.6622	0.64	1.683	2.101	0.5283	3.163	1.041
HSA-MIR-718	26.4337	0	26.7683	26.5787	24.8149	25.8149	25.8155	25.4284	27.8411	25.6592	25.7689	25.9208	25.432	25.5354	26.4337	0	26.7683	26.5787	24.8149	25.8149	25.8155	25.4284	27.8411	25.6592	25.7689	25.9208	25.432	25.5354	1.1032e-06		8.74842e-07	9.97712e-07	3.38831e-06	1.69407e-06	1.69339e-06	2.21454e-06	4.15893e-07	1.88718e-06	1.74897e-06	1.57426e-06	2.20899e-06	2.05628e-06	1.04	2.469	0.6529	1.296	NaN	1.685	1.097
HSA-MIR-20B	26.5021	26.7192	26.8539	26.814	26.4795	24.9916	26.1787	26.1595	27.5187	27.0831	26.9864	25.536	25.0407	26.5044	0.249107	0.0319843	-0.102773	-0.0628327	0.271667	1.75956	0.572437	0.591637	-0.767533	-0.331953	-0.235223	1.21516	1.71049	0.246797	84.1417	97.8074			82.8362	29.5339	67.248	66.3589				43.0726	30.5557	84.2765	1.251	1.16	1.08	0.7028	1.399	0.6703	1.075
HSA-MIR-196A	26.5169	26.8167	27.3895	27.2618	27.1959	26.4573	27.1203	27.0431	27.2784	26.6076	26.8264	26.8466	26.7513	26.4154	-1.11733	-1.41709	-1.98984	-1.86223	-1.79623	-1.05765	-1.72071	-1.64346	-1.8788	-1.20803	-1.42675	-1.44697	-1.3517	-1.01576															1.765	2.3	0.4704	1.119	1.864	0.5816	0.798
HSA-MIR-1910	26.6029	27.1027	24.635		25.8951	26.8613	26.8164	25.0153	29.5657	28.2131	28.435	28.6039	25.2016	26.0584	7.36617	6.86639	9.33406	0	8.07397	7.10776	7.15273	8.9538	4.40338	5.75598	5.53414	5.36516	8.76746	7.91066	0.606123	0.857056	0.154942		0.371102	0.725022	0.702771	0.201668	4.72553	1.85045	2.15803	2.4262	0.229473	0.415579	1.663	0.7556	1.377	0.367	1.529	1.432	0.985
HSA-MIR-940	26.6206	0	25.3071	28.0239	26.9758	26.7872	26.5996	26.4849	30.2683	26.2564	26.6132	26.8511	26.612	26.9561	4.10862	0	5.4221	2.70533	3.75343	3.94207	4.12963	4.24438	0.460965	4.47288	4.11599	3.87809	4.11718	3.77318	5.79671		2.3323	15.3325	7.41487	6.50605	5.71289	5.2761	72.65	4.50327	5.76716	6.80107	5.76241	7.31406	1.784	3.185	0.5625	1.409	NaN	0.7355	1.243
HSA-MIR-126	26.6353	26.3828	25.5556	26.897	25.0704	24.3111	24.9841	24.1118	28.6383	26.1423	25.6236	25.0197	23.6465	24.3682	3.97142	4.22394	5.05105	3.70971	5.53627	6.29557	5.62262	6.4949	1.96837	4.46435	4.98308	5.58698	6.9602	6.23853	6.37503	5.35142	3.01636	7.64306	2.15485	1.27305	2.02966	1.10877	25.5542	4.53	3.16188	2.08043	0.803105	1.32439	0.6304	1.231	1.569	0.9988	0.9762	0.9837	1.36
HSA-LET-7E	26.6555	28.3418	27.1684	27.0254	27.7026	27.0586	27.8524	26.8121	28.6236	30.3928	28.4423	28.4701	24.6995	27.4655	26.6555	28.3418	27.1684	27.0254	27.7026	27.0586	27.8524	26.8121	28.6236	30.3928	28.4423	28.4701	24.6995	27.4655	9.45984e-07	2.93955e-07	6.62974e-07	7.32071e-07	4.57811e-07	7.15411e-07	4.12668e-07	8.48705e-07	2.41795e-07	7.09327e-08	2.74161e-07	2.6893e-07	3.67029e-06	5.39597e-07	2.655	0.2762	3.229	0.6046	1.072	0.6777	0.7955
HSA-MIR-1913	26.6571	25.8065	23.728	28.8391	25.7582	27.4897	25.0723	24.1947	28.5147	24.0487		25.1029	24.8029	26.178	4.19536	5.04595	7.12448	2.01339	5.09432	3.36276	5.78021	6.65777	2.33774	6.80383	0	5.74964	6.0496	4.67447	5.45847	3.02704	0.716668	24.769	2.92723	9.72094	1.81963	0.990402	19.782	0.895041		1.8586	1.50969	3.91601	0.7863	6.652	0.8912	NaN	1.843	0.7733	1.62
HSA-MIR-15B	26.658	26.6368	26.4486	24.7964	24.6212	23.774	25.2449	25.031	25.65	27.7522	25.5799	24.8138	23.3829	25.6019	2.66366	2.68488	2.87303	4.52527	4.70049	5.54763	4.07672	4.29063	3.67169	1.56951	3.74181	4.5079	5.93876	3.71975	15.7818	15.5514	13.65	4.34268	3.84602	2.13795	5.92631	5.10965	7.84713	33.6923	7.47485	4.39528	1.63025	7.59003	0.5792	0.3763	1.757	0.9608	0.764	1.253	1.059
HSA-MIR-1228*	26.6898	26.0323	25.5913	25.862	24.3824	24.7427	26.0233	24.8219	26.9551	26.504	25.2647	26.5245	24.8297	25.227	2.36037	3.01785	3.45886	3.1882	4.66777	4.30743	3.0269	4.22831	2.09507	2.54614	3.78541	2.52562	4.22046	3.82317	19.4741	12.3463	9.09454	10.9713	3.93426	5.05052	12.2691	5.33523	23.4057	17.1213	7.25236	17.3666	5.36434	7.06501	0.6724	1.061	0.7651	1.419	1.379	1.755	0.733
HSA-MIR-103	26.7702	28.9718	26.3867	28.6506	26.3143	24.8358	26.5324	25.4917	28.9462	27.8906	27.6838	26.1213	23.9383	26.3301	26.7702	28.9718	26.3867	28.6506	26.3143	24.8358	26.5324	25.4917	28.9462	27.8906	27.6838	26.1213	23.9383	26.3301	8.73739e-07	1.89947e-07	1.13977e-06	2.3731e-07	1.19842e-06	3.33946e-06	1.03026e-06	2.11947e-06	1.93338e-07	4.01888e-07	4.63826e-07	1.36991e-06	6.22078e-06	1.18535e-06	1.364	0.8704	3.044	0.569	0.3855	0.9867	1.105
HSA-MIR-877	26.7778	28.4862	29.6515	29.553			27.1342	27.3034	31.6893	27.2081		27.5412	27.3767	27.5413	26.7778	28.4862	29.6515	29.553	0	0	27.1342	27.3034	31.6893	27.2081	0	27.5412	27.3767	27.5413	8.69145e-07	2.65941e-07	1.18581e-07	1.26961e-07			6.78892e-07	6.03738e-07	2.88788e-08	6.44997e-07		5.11993e-07	5.73838e-07	5.11961e-07	3.279	3.376	0.6787	NaN	1.304	NaN	1.759
HSA-MIR-92B	26.8588	28.1184	26.8966	27.5553	28.0517	26.0549	26.3908	26.8016	27.7105	28.735	28.338	26.7844	25.1391	27.7928	7.15235	5.89269	7.11453	6.4558	5.95939	7.95622	7.62037	7.20956	6.30061	5.27617	5.67312	7.2267	8.87203	6.21834	0.702956	1.68316	0.721627	1.13923	1.60711	0.402661	0.508206	0.675626	1.26861	2.58056	1.95984	0.667646	0.213429	1.34305	1.758	0.6643	1.815	0.4954	0.9543	0.4055	1.67
HSA-MIR-222	26.9389	27.9067	27.3192	27.9695	25.7713	24.6197	26.0827	25.7723	29.4664	27.6454	26.3871	26.8295	25.1598	25.9088	26.9389	27.9067	27.3192	27.9695	25.7713	24.6197	26.0827	25.7723	29.4664	27.6454	26.3871	26.8295	25.1598	25.9088	7.77313e-07	3.97425e-07	5.97158e-07	3.80481e-07	1.74604e-06	3.87908e-06	1.40709e-06	1.74484e-06	1.34812e-07	4.76334e-07	1.13946e-06	8.38542e-07	2.66775e-06	1.58739e-06	1.15	0.9776	1.237	1.325	0.7643	1.362	1.43
HSA-LET-7C	27.1997	28.465	27.0681	28.1746	27.4739	26.8101	28.2073	26.8055	28.7127	29.3758	28.561	27.3862	25.3872	27.5804	5.92373	4.65845	6.05536	4.94883	5.64956	6.31337	4.91613	6.31791	4.41069	3.74766	4.56242	5.73725	7.73625	5.54304	1.64732	3.95975	1.50367	3.23782	1.9921	1.25743	3.31204	1.25348	4.70163	7.44459	4.23227	1.87462	0.468981	2.14475	1.866	0.5728	2.055	0.5707	1.009	0.8138	0.6375
HSA-MIR-3622A-5P	27.216	30.4478	31.2817	29.7817	31.2725	29.2051	32.2397	29.5544	29.6825	27.5623	29.6961	30.2228	29.6539	29.0711	2.03845	-1.19336	-2.02724	-0.527223	-2.01808	0.049367	-2.98521	-0.299933	-0.427993	1.69215	-0.441633	-0.968353	-0.399433	0.183317	24.3425					96.636				30.9466				88.0676	8.021	8.752	0.464	1.13	1.11	0.2542	0.1694
HSA-MIR-1825	27.2279	27.6785	26.4058	27.4969	27.9392	28.0548	28.0799	27.9209	27.7835	26.9094	28.4619	27.062	26.8283	26.8958	-0.5541	-1.00472	0.267956	-0.823114	-1.26539	-1.38102	-1.40609	-1.24706	-1.10974	-0.235574	-1.78809	-0.388224	-0.154484	-0.222004			83.0496												1.62	2.802	0.6699	0.5411	1.541	0.5218	0.6164
HSA-MIR-101	27.2562	27.6758	26.4753	28.2904	24.6314	24.2686	24.5287	25.1703	28.3066	27.8044	25.8793	24.8701	24.2216	27.0432	27.2562	27.6758	26.4753	28.2904	24.6314	24.2686	24.5287	25.1703	28.3066	27.8044	25.8793	24.8701	24.2216	27.0432	6.23825e-07	4.66396e-07	1.0719e-06	3.04618e-07	3.84791e-06	4.948e-06	4.13178e-06	2.64846e-06	3.01206e-07	4.26623e-07	1.62011e-06	3.26111e-06	5.11192e-06	7.23099e-07	0.6412	0.6083	1.647	1.308	0.6231	2.086	2.917
HSA-MIR-194	27.3787	29.2057	23.4487	27.9543	26.3124	26.2612	26.8056	27.1585	29.2229	29.1119	27.81	26.7105	25.4311	27.9849	2.8088	0.981854	6.7389	2.23325	3.87517	3.92638	3.38196	3.02904	0.96467	1.07568	2.37757	3.47701	4.75643	2.20262	14.2714	50.6329	0.936244	21.2679	6.81487	6.57721	9.59243	12.2509	51.2396	47.4447	19.2433	8.98081	3.69975	21.7243	1.2	0.5007	1.451	0.6993	0.4397	1.325	1.226
HSA-MIR-223*	27.4275	27.8466	26.2823	28.1115	25.4194	24.0937	27.3845	27.2048	27.6187	27.7705	25.1692	27.9622	25.4056	25.1966	0.847666	0.428526	1.99289	0.163706	2.85578	4.18143	0.890706	1.07034	0.656486	0.504676	3.106	0.312976	2.86953	3.07857	55.5683	74.3021	25.1236	89.2729	13.8142	5.51144	53.935	47.6208	63.4422	70.4819	11.6145	80.498	13.6832	11.8375	0.7845	0.858	0.9986	2.949	0.7626	1.664	0.5551
HSA-MIR-17*	27.4412	0	29.1269	28.7474	28.822	28.5554	28.8934	29.7488	29.4679	28.4669	28.7174	29.6736	27.5168	28.3841	1.24522	0	-0.440512	-0.061012	-0.135602	0.131008	-0.206962	-1.06241	-0.781492	0.219488	-0.030992	-0.987212	1.16955	0.302308	42.1844					91.3193				85.887			44.4561	81.0954	3.889	2.649	1.157	1.262	NaN	0.7875	0.9761
HSA-MIR-1273E	27.4681	28.7472	26.9		28.6782	27.7429	27.3936	27.2721		26.351		28.1403	27.1949	28.0259	27.4681	28.7472	26.9	0	28.6782	27.7429	27.3936	27.2721	0	26.351	0	28.1403	27.1949	28.0259	5.38624e-07	2.21944e-07	7.98561e-07		2.32808e-07	4.45212e-07	5.67147e-07	6.16997e-07		1.16835e-06		3.38e-07	6.5089e-07	3.65891e-07	1.704	5.126	0.6453	NaN	0.9124	0.3883	1.232
HSA-MIR-424	27.483	28.521	28.3025	25.6889	23.9046	23.6329	26.147	25.6104	28.72	27.7167	24.8908	26.1492	24.6652	24.9171	27.483	28.521	28.3025	25.6889	23.9046	23.6329	26.147	25.6104	28.72	27.7167	24.8908	26.1492	24.6652	24.9171	5.33075e-07	2.59617e-07	3.02062e-07	1.8487e-06	6.3678e-06	7.68745e-06	1.34576e-06	1.95208e-06	2.26163e-07	4.53371e-07	3.21448e-06	1.34374e-06	3.75857e-06	3.1565e-06	0.546	0.6441	1.207	2.587	0.3456	3.44	0.9466
HSA-LET-7D	27.616	29.5692	28.5869	27.8423	28.3377	26.8665	28.2314	27.1066	31.2869	32.4256	28.6609	29.3338	25.5714	27.499	27.616	29.5692	28.5869	27.8423	28.3377	26.8665	28.2314	27.1066	31.2869	32.4256	28.6609	29.3338	25.5714	27.499	4.8614e-07	1.25543e-07	2.48023e-07	4.15568e-07	2.94787e-07	8.1727e-07	3.17332e-07	6.91986e-07	3.81674e-08	1.7335e-08	2.3561e-07	1.47786e-07	2.00556e-06	5.27201e-07	2.499	0.1236	3.232	0.9517	0.8389	0.7992	1.12
HSA-MIR-363	27.6777	28.9965	27.2082	28.4353	26.1898	25.8513	25.6631	26.275	29.5423	28.8433	29.653	26.5013	25.2125	28.6447	27.6777	28.9965	27.2082	28.4353	26.1898	25.8513	25.6631	26.275	29.5423	28.8433	29.653	26.5013	25.2125	28.6447	4.6578e-07	1.86721e-07	6.44944e-07	2.75498e-07	1.30643e-06	1.65188e-06	1.88202e-06	1.23151e-06	1.279e-07	2.0764e-07	1.1846e-07	1.05275e-06	2.57199e-06	2.38279e-07	1.183	0.7316	2.048	0.2364	0.6165	1.75	3.283
HSA-MIR-27A	27.7165	26.7189	26.185	26.2338	23.1634	22.1605	25.7042	24.0877	26.7244	25.5846	23.3275	25.394	23.8299	23.1374	0.899305	1.89684	2.4308	2.38198	5.45239	6.4553	2.91156	4.52809	1.89141	3.03117	5.28828	3.22176	4.78582	5.47832	53.6145	26.8531	18.5462	19.1846	2.28384	1.13962	13.2902	4.33419	26.9543	12.2328	2.55899	10.719	3.62513	2.24316	0.2064	1.255	0.9567	3.397	0.5356	2.555	0.5718
HSA-MIR-3181	27.8096	28.2129	27.9892	28.0323	27.9049	27.4701	27.8133	27.831	28.4224	27.7265	27.8019	27.7502	27.5453	27.5673	-1.88887	-2.29215	-2.06851	-2.11153	-1.98422	-1.54936	-1.89263	-1.91032	-2.5017	-1.8058	-1.8812	-1.82952	-1.62454	-1.64657															1.396	2.051	0.5254	1.102	1.372	0.6889	0.956
HSA-MIR-24	27.8234	28.5071	27.4804	27.1308	25.4345	24.4914	26.5965	26.1222	27.887	28.5019	26.1582	26.973	25.3752	25.2221	3.50009	2.81634	3.84308	4.19268	5.88895	6.83202	4.72701	5.20126	3.43642	2.82161	5.16524	4.3505	5.94827	6.10132	8.83827	14.1971	6.96817	5.46863	1.68753	0.877725	3.77598	2.7181	9.2371	14.1453	2.78682	4.90197	1.61955	1.45654	0.6206	0.5379	1.062	1.547	0.5022	1.714	0.9978
HSA-MIR-3689A-3P	27.8488	27.2812	27.7232	27.2039	27.4118	27.9188	27.8661	26.8681	29.873	27.718	26.9832	27.8398	28.306	27.7559	-1.41213	-0.844561	-1.28659	-0.767286	-0.975116	-1.48221	-1.42943	-0.431426	-3.43632	-1.28136	-0.546596	-1.40313	-1.86938	-1.31923															1.275	1.936	0.2911	1.825	2.456	0.9102	0.8651
HSA-MIR-136*	27.8657	28.2034	30.2819	30.6078		27.5436	27.7745		28.7842	29.2264	26.4672	30.6315		26.2647	-1.99968	-2.33732	-4.41588	-4.74177	0	-1.67759	-1.90842	0	-2.91817	-3.36032	-0.601178	-4.76547	0	-0.398598															1.858	1.004	NaN	3.849	1.912	NaN	1.36
HSA-MIR-1271	27.8982	29.4334	31.1023	29.9049	29.3801	28.5789	29.572	28.7518	27.5615	31.268	29.4653	29.2943	30.0586	29.5831	1.32164	-0.213593	-1.8824	-0.68508	-0.16023	0.6409	-0.35211	0.4681	1.65836	-2.04814	-0.24543	-0.07442	-0.8387	-0.36325	40.008					64.1313		72.2916	31.6799						3.896	0.5228	0.2732	1.033	1.747	0.7356	0.8386
HSA-MIR-1231	27.9122	28.7542	28.2947	28.5034	29.6674	28.8218	29.5843		29.8245	27.7664	28.8592				1.19197	0.349897	0.809415	0.600705	-0.563305	0.282355	-0.480115	0	-0.720315	1.33773	0.244965	0	0	0	43.7704	78.464	57.0613	65.9432		82.2248				39.5644	84.3836				2.172	3.334	NaN	0.8854	1.575	0.3394	0.4682
HSA-MIR-324-3P	27.9321	29.741	27.498	29.5264	28.2599	27.1819	28.0332	28.0477	29.4521	31.5548	30.1957	27.1671	26.485	28.408	0.98971	-0.819219	1.42377	-0.604618	0.661862	1.73991	0.888632	0.874072	-0.530328	-2.63297	-1.27387	1.75474	2.43679	0.513832	50.3579		37.2736		63.2062	29.9388	54.0126	54.5605				29.6326	18.4694	70.036	2.063	0.2323	1.763	0.3375	0.7652	0.8667	1.321
HSA-MIR-3174	27.9564	29.0456	28.3614	27.3696	28.3403	28.2615	28.8477	29.106	27.3311	28.3103	28.4294	28.5774	29.177	27.7018	-1.42075	-2.50994	-1.82574	-0.833926	-1.80472	-1.72585	-2.31209	-2.57043	-0.795486	-1.77465	-1.89383	-2.04174	-2.64134	-1.16621															1.777	1.929	0.2391	1.006	1.086	0.7183	0.6581
HSA-MIR-1281	27.9727	0	24.0496			27.5474	25.3049				27.7318	24.8275	25.67	27.2207	-0.124235	0	3.79887	0	0	0.301126	2.54358	0	0	0	0.116646	3.02101	2.17851	0.627796			7.18501			81.1619	17.1517				92.2329	12.3193	22.0904	64.7164	0.5276	NaN	0.816	0.4899	NaN	NaN	2.303
HSA-MIR-191	28.0343	28.6385	26.4682	28.2075	26.4468	25.1367	26.815	26.0207	28.2654	29.2655	26.8169	27.1143	24.7923	25.8851	4.46144	3.85728	6.02756	4.28829	6.04895	7.35904	5.6807	6.47503	4.23035	3.23026	5.6788	5.38145	7.70343	6.61067	4.53915	6.8999	1.53293	5.11794	1.51037	0.609126	1.94957	1.12414	5.32767	10.656	1.95214	2.39895	0.479773	1.02327	0.6603	0.3902	1.958	1.206	0.5646	1.047	1.056
HSA-MIR-423-5P	28.0393	28.5327	28.1025	29.3976	27.3026	26.4677	27.3152	27.4839	29.202	29.9956	28.103	27.407	26.5256	27.8357	28.0393	28.5327	28.1025	29.3976	27.3026	26.4677	27.3152	27.4839	29.202	29.9956	28.103	27.407	26.5256	27.8357	3.62505e-07	2.57515e-07	3.46978e-07	1.41395e-07	6.04081e-07	1.07755e-06	5.98828e-07	5.32737e-07	1.61922e-07	9.34141e-08	3.46862e-07	5.61911e-07	1.03515e-06	4.17464e-07	1.303	0.4659	1.166	0.9798	1.203	1.145	1.479
HSA-MIR-3615	28.1114	27.6461	25.0915	27.6676	27.6244	26.3304	27.2024	27.1275		26.3169	28.0851	26.7187	26.4907	27.5207	5.85788	6.32319	8.87784	6.30171	6.34494	7.63895	6.76694	6.84179	0	7.65246	5.88417	7.25059	7.47862	6.44865	1.72425	1.2489	0.212571	1.26764	1.23022	0.501702	0.918221	0.871797		0.497026	1.69312	0.656681	0.560674	1.14489	0.7011	3.374	0.6759	0.561	1.258	0.5183	0.9043
HSA-MIR-575	28.1778	29.6551	31.6667	30.1202		29.6363				30.6207	29.5863	31.4542	31.3826	29.2057	1.41308	-0.064228	-2.07582	-0.529394	0	-0.0455044	0	0	0	-1.02981	0.0045156	-1.86335	-1.79174	0.385156	37.5509										99.6875			76.5696	5.364	1.368	0.1824	1.588	2.504	NaN	NaN
HSA-MIR-378	28.1851	29.5803	28.2797	29.4363	27.0784	26.0137	26.8085	28.0271	29.6564	33.4882	29.422	27.8553	26.5955	28.1432	28.1851	29.5803	28.2797	29.4363	27.0784	26.0137	26.8085	28.0271	29.6564	33.4882	29.422	27.8553	26.5955	28.1432	3.27661e-07	1.24577e-07	3.06867e-07	1.37652e-07	7.05645e-07	1.47607e-06	8.50849e-07	3.65592e-07	1.18177e-07	8.29947e-09	1.3903e-07	4.1184e-07	9.86161e-07	3.37326e-07	1.654	0.05813	1.561	0.5515	0.8175	1.879	2.95
HSA-MIR-3130-5P	28.2102	28.8821	30.1116	29.2158		28.5944	27.5628	28.7073	30.7991	27.9352	28.5067		27.6511	28.6327	0.566937	-0.104929	-1.33437	-0.438606	0	0.182823	1.21439	0.0698935	-2.02193	0.842023	0.270504	0	1.12612	0.144503	67.5049					88.0977	43.0954	95.2708		55.7861	82.903		45.8145	90.4691	1.896	3.182	0.8755	1.213	1.547	NaN	2.039
HSA-MIR-197	28.2238	28.3665	27.5103	29.0413	25.7837	25.556	30.3431	27.7875	28.2986		26.981	27.8728	26.4308	25.9124	0.415305	0.272658	1.12886	-0.40214	2.85546	3.08315	-1.70396	0.8516	0.34052	0	1.65808	0.76634	2.20836	2.72676	74.9861	82.7793	45.7277		13.8172	11.7999		55.417	78.9757		31.6861	58.7907	21.638	15.1065	0.8921	NaN	0.9691	1.659	1.05	2.553	0.141
HSA-MIR-610	28.2309	30.6161	29.5274	28.771	30.1559	29.0595	29.8612	29.081	29.2016	28.8461	32.1485	30.1814	28.9423	28.199	-0.490822	-2.876	-1.78738	-1.03097	-2.41588	-1.3194	-2.12119	-1.34095	-1.46153	-1.10599	-4.4084	-2.44138	-1.20226	-0.458985															3.246	2.939	0.6213	0.1688	0.8076	0.4507	0.72
HSA-MIR-657	28.2357	28.2399	28.4838	29.4514		29.1109			28.4578	28.7218	28.7629	28.4511	30.377	31.3406	-0.366645	-0.370773	-0.61468	-1.58234	0	-1.24186	0	0	-0.58874	-0.8527	-0.89379	-0.58205	-2.5079	-3.47147															2.251	2.23	0.16	1.227	2.918	NaN	NaN
HSA-MIR-216A	28.2539	29.3719	28.6714	29.29	29.8669	28.0602	29.2584	30.22	29.514	29.6147	28.3533	29.2261	29.3147	29.6554	0.167828	-0.950115	-0.249692	-0.868292	-1.44518	0.361528	-0.836702	-1.79821	-1.09227	-1.193	0.0684177	-0.804402	-0.893002	-1.23362	89.0182					77.834					95.3683				2.773	1.498	0.4167	2.034	1.661	0.4781	0.9493
HSA-MIR-3151	28.2711	29.9815	33.3874	27.8806	29.3645	29.1452	31.2083		29.979	30.448		28.672	30.0894	29.0346	0.360672	-1.34969	-4.75562	0.751206	-0.732684	-0.513444	-2.57654	0	-1.34718	-1.81618	0	-0.0402437	-1.45762	-0.402814	77.8802			59.4107											3.811	1.169	0.3388	NaN	1.514	0.942	0.3418
HSA-MIR-181B	28.2777	28.6417	27.9373	29.3744	28.8907	27.4452	28.8662	28.4762	29.0929	28.1014	28.6077	30.2797	27.0275	29.5761	-0.977245	-1.34123	-0.636838	-2.07393	-1.59026	-0.144728	-1.56578	-1.17571	-1.79244	-0.800998	-1.30726	-2.97928	0.272962	-2.27571													82.7619		1.715	2.688	1.279	1.072	1.732	0.5914	0.7834
HSA-MIR-3192	28.2895	29.2268	29.5952	28.4211	29.0341	27.8545	29.4228	28.8479	29.0598	27.8027	29.199	28.5993	28.1889	28.5645	-0.788197	-1.72558	-2.09392	-0.91983	-1.53283	-0.35326	-1.92156	-1.34659	-1.55851	-0.30147	-1.69773	-1.09801	-0.68769	-1.06328															1.833	3.564	0.6161	0.7669	1.244	0.5771	0.574
HSA-MIR-4311	28.3356	31.3057	30.6232	30.7579	28.3031	28.8107	30.3419	34.9584	29.119		30.4173	30.4962	31.0017	31.1105	0.198177	-2.77193	-2.08944	-2.22409	0.230624	-0.276946	-1.80814	-6.42463	-0.585256	0	-1.88353	-1.9624	-2.46792	-2.57679	87.1651				85.2266										6.089	NaN	0.3007	1.13	1.01	3.284	1.041
HSA-MIR-4301	28.364	28.0301	27.1644	26.5456	26.9905	26.5222	27.8255	25.5196	29.2685	28.636	28.4484	28.6486	25.8651	25.8529	1.4063	1.74017	2.60585	3.22467	2.77973	3.24806	1.94476	4.25065	0.501755	1.1343	1.32193	1.12167	3.90515	3.9174	37.7277	29.9335	16.4272	10.6974	14.5619	10.5254	25.9759	5.25325	70.6247	45.5557	40.0001	45.9563	6.67474	6.6183	0.6993	0.8034	1.239	0.5182	1.146	0.9555	0.6976
HSA-MIR-133A	28.3899	30.4471	28.4626	30.7143	29.7265	29.7533	29.6875	30.1327		28.5649	29.2194			28.2902	0.0422669	-2.01498	-0.0304549	-2.28222	-1.29433	-1.32114	-1.25535	-1.70059	0	-0.132815	-0.787255	0	0	0.141965	97.1128													90.6284	2.89	3.55	NaN	1.278	0.9025	0.6034	0.8073
HSA-MIR-296-3P	28.4179	29.7617	28.4647	28.4175	27.8884	27.4573	28.9904	28.5867	28.6929	28.5287	28.1385	28.5787	28.1184	28.0589	0.687168	-0.656675	0.640356	0.687546	1.21664	1.64772	0.114656	0.518356	0.412156	0.576316	0.966566	0.526376	0.986646	1.04611	62.1072		64.1555	62.0909	43.0285	31.9145	92.3603	69.8167	75.15	67.0674	51.1723	69.4297	50.465	48.4274	1.376	1.767	0.5306	1.312	0.7044	1.047	0.6353
HSA-MIR-556-5P	28.4227	29.3866	29.2153	28.7967	29.7911	28.1335	30.2304	29.1926	29.9019	29.4029	29.0384	29.3554	28.7194	29.0839	-1.24667	-2.21053	-2.03929	-1.6207	-2.61503	-0.95741	-3.05433	-2.01659	-2.72585	-2.22686	-1.86234	-2.1793	-1.5434	-1.90787															2.314	1.627	0.5904	1.186	1.542	0.4726	0.4539
HSA-MIR-3137	28.4475	29.2364	30.8522	30.0808	29.4907	30.0307		30.784	31.7916		28.2258	33.1819	33.3431	28.6413	1.69733	0.908466	-0.707392	0.0640179	0.654188	0.114168	0	-0.639102	-1.64671	0	1.91907	-3.03706	-3.19826	1.50357	30.8355	53.2751		95.6596	63.5433	92.3915					26.4425			35.268	5.295	NaN	0.05576	4.852	3.984	1.355	NaN
HSA-MIR-3679-3P	28.4544	0	31.5413	30.2765	34.1878	33.8499	30.3121	30.0606	29.1262	30.4263	30.6076	30.9097	29.8722	28.8193	0.498234	0	-2.58867	-1.32391	-5.23519	-4.89723	-1.35944	-1.108	-0.173625	-1.47371	-1.655	-1.95712	-0.919545	0.133335	70.7973													91.1721	6.5	2.298	0.7626	1.148	NaN	0.06443	1.232
HSA-MIR-31*	28.4771	0			32.5951		29.9816	31.6427			28.701		29.4654	29.0527	28.4771	0	0	0	32.5951	0	29.9816	31.6427	0	0	28.701	0	29.4654	29.0527	2.67633e-07				1.54132e-08		9.43244e-08	2.98262e-08			2.29153e-07		1.34903e-07	1.79588e-07	4.767	NaN	0.7531	3.207	NaN	0.1448	1.154
HSA-MIR-524-3P	28.5176	0	29.9954		30.9532		31.6611			29.2869		31.0452	30.9225	31.7985	28.5176	0	29.9954	0	30.9532	0	31.6611	0	0	29.2869	0	31.0452	30.9225	31.7985	2.60221e-07		9.3431e-08		4.81011e-08		2.94482e-08			1.52674e-07		4.51292e-08	4.9136e-08	2.67736e-08	5.877	4.784	0.3479	NaN	NaN	0.573	0.4568
HSA-MIR-122	28.5656	29.0475	22.5599	31.0699	26.2381	27.5895	29.5584	28.6699	32.5959	29.077	27.0456	28.5667	30.0847	28.0316	1.3717	0.889782	7.37733	-1.13263	3.69914	2.34779	0.37882	1.26738	-2.65865	0.86028	2.89165	1.3705	-0.14745	1.90568	38.6436	53.9696	0.601454		7.69924	19.6447	76.9066	41.5413		55.0846	13.4749	38.6757		26.6891	1.279	1.245	0.1399	2.882	1.19	3.386	0.4414
HSA-MIR-4292	28.5957	30.2421	32.0645	30.1641			29.2995			29.8352	30.5866	31.647	29.7647	32.3999	28.5957	30.2421	32.0645	30.1641	0	0	29.2995	0	0	29.8352	30.5866	31.647	29.7647	32.3999	2.46503e-07	7.87465e-08	2.22655e-08	8.31163e-08			1.51342e-07			1.04403e-07	6.20169e-08	2.97383e-08	1.09634e-07	1.76471e-08	4.566	2.683	0.6366	0.9027	1.896	NaN	1.925
HSA-MIR-30C	28.6138	28.9539	25.7341	27.9585	26.8172	26.5225	28.2033	26.5561	28.8909	28.056	27.0917	27.9095	24.873	27.0342	28.6138	28.9539	25.7341	27.9585	26.8172	26.5225	28.2033	26.5561	28.8909	28.056	27.0917	27.9095	24.873	27.0342	2.43434e-07	1.92306e-07	1.79164e-06	3.83406e-07	8.45722e-07	1.03737e-06	3.23562e-07	1.01348e-06	2.00901e-07	3.58338e-07	6.99165e-07	3.96646e-07	3.25438e-06	7.27614e-07	0.5746	1.173	2.408	1.297	0.5901	1.053	0.5246
HSA-MIR-30B	28.6193	28.9321	25.5718	29.6798	26.4625	25.5808	27.7504	25.4167	31.5234	28.3844	28.5159	27.6009	24.5281	25.9888	28.6193	28.9321	25.5718	29.6798	26.4625	25.5808	27.7504	25.4167	31.5234	28.3844	28.5159	27.6009	24.5281	25.9888	2.42512e-07	1.95238e-07	2.00498e-06	1.16272e-07	1.08144e-06	1.99262e-06	4.42894e-07	2.23257e-06	3.23966e-08	2.85394e-07	2.6054e-07	4.91265e-07	4.13336e-06	1.50177e-06	0.6117	0.9987	3.268	0.5164	0.6402	1.439	0.7673
HSA-MIR-342-3P	28.6259	28.8576	27.5603	27.1002	24.8202	23.9797	27.5856	26.3069	28.0135	29.281	27.5362	28.8125	25.675	26.3322	2.59835	2.36656	3.66388	4.12405	6.40403	7.24446	3.63864	4.91731	3.21068	1.94318	3.68803	2.41171	5.54922	4.89203	16.5127	19.3907	7.88975	5.73506	1.18085	0.659479	8.02899	3.30935	10.8016	26.0043	7.75878	18.7933	2.1356	3.36785	0.4979	0.4386	1.207	0.8326	0.5511	3.672	0.7033
HSA-MIR-4265	28.6439	30.1275	29.0533	29.1832		28.534		30.3696	28.3364	32.1279	29.4496	30.2534	29.6995		0.19632	-1.28727	-0.213103	-0.342913	0	0.306237	0	-1.52931	0.503797	-3.28762	-0.609323	-1.41317	-0.859313	0	87.2774					80.8749			70.5248						2.509	0.3111	0.3783	1.128	1.166	NaN	NaN
HSA-MIR-320A	28.6667	28.8029	28.2953	28.4102	27.5443	26.7792	27.6329	27.6213	30.2525	30.8371	29.5855	27.8654	27.0706	29.8166	5.28239	5.14619	5.65374	5.53884	6.40474	7.16986	6.3162	6.32776	3.69651	3.11199	4.36359	6.08367	6.87844	4.13244	2.56946	2.82386	1.98634	2.15101	1.18027	0.694475	1.25497	1.24496	7.71328	11.5664	4.85767	1.47446	0.849929	5.70179	1.221	0.3763	1.157	0.5076	1.444	1.402	1.717
HSA-MIR-30A	28.6791	30.5923	27.2642	29.542	28.3298	27.079	28.6132	28.0817	31.0404	28.8711	28.1643	28.1282	26.7132	27.4815	3.04666	1.13341	4.46154	2.18372	3.39594	4.64674	3.11256	3.64408	0.685368	2.8547	3.56147	3.59756	5.0126	4.24426	12.1022	45.5836	4.53882	22.0108	9.49994	3.99202	11.5618	7.99877	62.1847	13.8245	8.47016	8.2609	3.09783	5.27656	1.175	1.427	1.439	1.319	0.4056	0.7896	0.8449
HSA-MIR-4289	28.6859	28.8597	28.7286	29.012	26.8848	25.7326	26.3707	26.5357	32.4645	29.6766	28.968	26.3771	25.6086	27.3996	5.33632	5.16247	5.29358	5.01022	7.13742	8.28962	7.65151	7.48654	1.55774	4.3456	5.05423	7.64509	8.41366	6.62266	2.47519	2.79217	2.54962	3.10295	0.710271	0.319578	0.497356	0.557607	33.9684	4.91864	3.00972	0.499574	0.29325	1.0148	0.8159	0.5696	2.159	0.5272	0.9402	1.5	2.789
HSA-MIR-652	28.7188	28.3948	27.2658	28.9383	27.2218	26.0398	27.2524	27.0466	30.1126	30.4943	28.08	27.1518	25.8034	27.2595	28.7188	28.3948	27.2658	28.9383	27.2218	26.0398	27.2524	27.0466	30.1126	30.4943	28.08	27.1518	25.8034	27.2595	2.26344e-07	2.83346e-07	6.19684e-07	1.94407e-07	6.3887e-07	1.44954e-06	6.25475e-07	7.21367e-07	8.61393e-08	6.61147e-08	3.52431e-07	6.70647e-07	1.70762e-06	6.22405e-07	0.7395	0.2997	1.749	0.9048	1.203	1.101	1.404
HSA-MIR-20A*	28.7424	28.9384	30.151	29.7836	30.5957	29.302	30.2863	29.55	30.0441	29.6802	29.1664	29.1524	31.5938	29.3591	-0.264805	-0.4608	-1.67346	-1.30601	-2.11817	-0.824454	-1.80871	-1.0724	-1.56652	-1.20267	-0.688804	-0.674824	-3.11621	-0.881584															2.711	1.963	0.1177	1.588	3.076	0.3956	0.6385
HSA-MIR-518E	28.7786	31.0288	27.1825	33.8043	33.2565	30.8209	28.5189		30.2049		31.4129	29.6638	28.9122	31.4072	3.93229	1.68208	5.52836	-1.09343	-0.545604	1.89	4.19195	0	2.50593	0	1.29799	3.04709	3.79868	1.30365	6.5503	31.1633	2.1667			26.9808	5.4714		17.6052		40.6694	12.0986	7.18596	40.5101	4.343	NaN	1.241	0.5496	1.187	0.1028	3.571
HSA-MIR-146A	28.7825	28.9973	29.4673	28.7834	27.0221	26.0505	28.2446	26.5262	29.622	30.6733	28.261	28.5204	26.3611	26.5682	1.27077	1.05596	0.585955	1.26992	3.03117	4.00277	1.80866	3.52706	0.431275	-0.619955	1.79228	1.53287	3.69223	3.48513	41.4438	48.0976	66.6208	41.4681	12.2328	6.23799	28.5455	8.67457	74.1606		28.8714	34.5588	7.73618	8.93038	0.8668	0.3243	1.456	0.9777	0.9709	1.549	0.8644
HSA-MIR-571	28.805	28.0051	31.9331			27.4899	29.3381		28.8277	32.4661	27.2106	33.6743	29.1477	27.9868	1.5604	2.36033	-1.56765	0	0	2.87554	1.02737	0	1.53774	-2.1007	3.1549	-3.30886	1.21773	2.37864	33.9057	19.4746				13.6263	49.0605		34.4426		11.2275		42.996	19.2291	2.211	0.2424	0.5464	5.245	5.003	NaN	1.049
HSA-MIR-192	28.8107	30.0998	25.1035	28.8204	27.0895	26.8673	28.4305	28.031	28.4216	29.3876	30.2128	27.7716	27.3871	29.7887	0.741804	-0.547248	4.44901	0.732152	2.463	2.68516	1.12196	1.52151	1.13088	0.164862	-0.660258	1.78095	2.16536	-0.236228	59.7991		4.5784	60.2005	18.1369	15.5484	45.9469	34.8321	45.6637	89.2014		29.0991	22.2926		0.9546	0.8877	0.8027	0.2838	0.5078	1.66	0.8533
HSA-MIR-26A	28.8356	30.1143	27.8951	28.0873	28.0231	26.295	28.184	26.1513	29.4449	30.1527	28.8538	28.9315	25.7358	26.3185	28.8356	30.1143	27.8951	28.0873	28.0231	26.295	28.184	26.1513	29.4449	30.1527	28.8538	28.9315	25.7358	26.3185	2.08752e-07	8.60408e-08	4.00628e-07	3.50645e-07	3.66612e-07	1.21453e-06	3.2792e-07	1.3418e-06	1.3684e-07	8.37768e-08	2.06137e-07	1.95326e-07	1.78953e-06	1.19489e-06	0.8008	0.4458	2.152	0.6214	0.4291	0.7417	0.864
HSA-MIR-454	28.8367	29.9907	28.3729	29.207	30.3973	29.8155	29.2925	28.407	31.265	29.6607	30.2954	29.6542	26.8134	29.1617	28.8367	29.9907	28.3729	29.207	30.3973	29.8155	29.2925	28.407	31.265	29.6607	30.2954	29.6542	26.8134	29.1617	2.08587e-07	9.37328e-08	2.87674e-07	1.61364e-07	7.07147e-08	1.05835e-07	1.52083e-07	2.80952e-07	3.87528e-08	1.17826e-07	7.58864e-08	1.18356e-07	8.47923e-07	1.66514e-07	1.965	1.54	2.504	0.5618	1.148	0.3514	0.9841
HSA-MIR-484	28.8525	28.1304	26.8837	27.9313	28.0193	25.7605	26.8357	26.9805	29.7533	29.9894	29.0901	27.1463	25.8145	27.6532	28.8525	28.1304	26.8837	27.9313	28.0193	25.7605	26.8357	26.9805	29.7533	29.9894	29.0901	27.1463	25.8145	27.6532	2.06317e-07	3.40332e-07	8.07623e-07	3.907e-07	3.67581e-07	1.75923e-06	8.3494e-07	7.55218e-07	1.10501e-07	9.38191e-08	1.74986e-07	6.73204e-07	1.69464e-06	4.73775e-07	0.6435	0.4059	1.657	0.4288	1.38	0.6046	1.788
HSA-MIR-148A	28.8994	29.2222	26.7577	29.1949	25.3293	25.076	27.1407	26.5627	30.5731	29.7964	26.2074	27.4656	25.8971	26.1012	28.8994	29.2222	26.7577	29.1949	25.3293	25.076	27.1407	26.5627	30.5731	29.7964	26.2074	27.4656	25.8971	26.1012	1.99714e-07	1.59671e-07	8.81343e-07	1.62726e-07	2.372e-06	2.8273e-06	6.7585e-07	1.00889e-06	6.25995e-08	1.07251e-07	1.29061e-06	5.39545e-07	1.60027e-06	1.38921e-06	0.4956	0.3692	1.245	2.516	0.515	3.104	1.152
HSA-MIR-644	28.9041	0			34.0337						30.9967	31.371	33.7113		28.9041	0	0	0	34.0337	0	0	0	0	0	30.9967	31.371	33.7113	0	1.9906e-07				5.68618e-09						4.66741e-08	3.60061e-08	7.11044e-09		11.99	NaN	0.1343	2.21	NaN	0.1807	NaN
HSA-MIR-4269	28.9162	28.2029	30.6061			28.1334	29.2455	28.9223		28.8401	28.0073	28.5684	28.0039		-0.166743	0.546598	-1.85661	0	0	0.616096	-0.496014	-0.172823	0	-0.0906135	0.742176	0.181067	0.745576	0		68.4632				65.2434					59.7837	88.2051	59.6429		1.281	1.874	0.7559	1.89	2.731	NaN	0.7004
HSA-MIR-186	28.9165	28.3983	27.5964	28.5998	27.5752	26.0963	27.6209	28.0288	30.5598	29.0747	29.0988	26.7517	26.474	27.8739	3.38058	3.89876	4.70067	3.69725	4.72184	6.20078	4.67618	4.26832	1.7373	3.2224	3.19825	5.54537	5.82304	4.42315	9.60158	6.70436	3.84555	7.70935	3.78953	1.3595	3.91138	5.1893	29.9931	10.7143	10.8951	2.1413	1.76641	4.66122	0.7439	0.9247	1.267	0.5151	1.385	0.994	1.254
HSA-MIR-656	28.9379	29.6337	31.2345	28.9133	30.0367	29.2786	29.8224	28.1278	28.5143	29.696	28.6645	29.6759	29.7147	28.6677	-1.61006	-2.30588	-3.90668	-1.58549	-2.70884	-1.95083	-2.49462	-0.799968	-1.18649	-2.36822	-1.3367	-2.34811	-2.38688	-1.33987															1.809	1.484	0.331	1.718	1.452	0.4456	0.6731
HSA-MIR-132	28.9433	28.6336	29.0267	29.2676	28.8094	28.0132	27.4091	28.8997	27.2386	28.6842	28.5918	27.8599	28.3697	28.2354	-1.96363	-1.65393	-2.04698	-2.28788	-1.82975	-1.03351	-0.429422	-1.91997	-0.258922	-1.70448	-1.61206	-0.880212	-1.38997	-1.25574															0.95	1.577	0.4432	0.9525	1.531	0.5498	1.89
HSA-MIR-29A	28.9611	30.8794	28.6566	27.4549	24.3754	24.3376	28.3672	26.3347	28.7575	29.6836	26.5528	28.9311	25.7805	26.0249	28.9611	30.8794	28.6566	27.4549	24.3754	24.3376	28.3672	26.3347	28.7575	29.6836	26.5528	28.9311	25.7805	26.0249	1.91354e-07	5.06261e-08	2.36323e-07	5.43584e-07	4.5949e-06	4.71689e-06	2.88822e-07	1.18157e-06	2.20365e-07	1.15971e-07	1.01578e-06	1.95372e-07	1.73503e-06	1.46463e-06	0.4958	0.4169	1.409	2.068	0.1705	6.279	0.514
HSA-MIR-3606	29.0008	31.6862	29.3881	30.0897	31.2218	29.4854	31.4979	30.7479	29.7586	29.1197	30.3714	31.7858	30.5139	29.9344	-0.518219	-3.20363	-0.905496	-1.60709	-2.73919	-1.00276	-3.01528	-2.2653	-1.27603	-0.637147	-1.88884	-3.30316	-2.03128	-1.45184															3.41	4.357	0.3746	1.036	0.6891	0.3858	0.4149
HSA-MIR-4325	29.0197	29.3558	28.6618	29.2012	28.8105	27.6292	27.8794	28.3211	30.419	31.4297	29.8386	28.1054	27.1679	29.4122	29.0197	29.3558	28.6618	29.2012	28.8105	27.6292	27.8794	28.3211	30.419	31.4297	29.8386	28.1054	27.1679	29.4122	1.83739e-07	1.4555e-07	2.35473e-07	1.62018e-07	2.12406e-07	4.81713e-07	4.05017e-07	2.98188e-07	6.96557e-08	3.45702e-08	1.04159e-07	3.46276e-07	6.63199e-07	1.39971e-07	1.291	0.3371	1.461	0.5752	1.33	0.7873	1.955
HSA-MIR-7	29.026	30.1099	30.2869	31.9162	29.2467	28.4654	29.9715	29.8645	31.1785	30.8683	33.4078	28.5039	27.8295	31.6111	29.026	30.1099	30.2869	31.9162	29.2467	28.4654	29.9715	29.8645	31.1785	30.8683	33.4078	28.5039	27.8295	31.6111	1.82932e-07	8.63041e-08	7.63353e-08	2.46748e-08	1.56991e-07	2.69821e-07	9.4993e-08	1.02303e-07	4.1148e-08	5.10167e-08	8.775e-09	2.62714e-07	4.19256e-07	3.04861e-08	2.988	1.156	2.147	0.1126	1.833	1.353	1.066
HSA-MIR-4272	29.0423	29.2229	30.262	30.618	32.3766	30.8709					31.5588		31.5056	29.8792	0.17971	-0.000824	-1.03998	-1.39595	-3.15456	-1.64886	0	0	0	0	-2.33675	0	-2.28352	-0.657173	88.288														4.447	NaN	0.2528	0.6106	5.1	0.2325	NaN
HSA-MIR-27B*	29.0454	30.3824		31.098	31.1772	29.8552	29.4944	29.4195	33.7197	29.2893	30.0459	29.8852	29.5494	29.3282	29.0454	30.3824	0	31.098	31.1772	29.8552	29.4944	29.4195	33.7197	29.2893	30.0459	29.8852	29.5494	29.3282	1.80493e-07	7.14459e-08		4.35089e-08	4.11845e-08	1.02962e-07	1.32219e-07	1.39272e-07	7.06901e-09	1.52415e-07	9.02159e-08	1.00849e-07	1.27272e-07	1.48366e-07	2.976	3.486	0.6579	1.169	1.531	0.3582	1.497
HSA-MIR-934	29.051	30.6255		29.6555	30.3835	32.2462	29.9109		30.7581	29.8952	32.1227		29.7854		-0.780277	-2.35478	0	-1.38477	-2.11276	-3.97544	-1.64019	0	-2.48737	-1.62443	-3.85201	0	-1.51467	0															3.362	2.598	0.6334	0.3142	1.467	0.704	1.272
HSA-MIR-124	29.0852	29.2553	28.6228	27.0605	29.2311	26.9633	28.4646	28.7488	28.8953	27.8745	28.713	28.4373	28.146	27.7237	29.0852	29.2553	28.6228	27.0605	29.2311	26.9633	28.4646	28.7488	28.8953	27.8745	28.713	28.4373	28.146	27.7237	1.75585e-07	1.56055e-07	2.41915e-07	7.14465e-07	1.58689e-07	7.64276e-07	2.69963e-07	2.21693e-07	2.00288e-07	4.06375e-07	2.27254e-07	2.75126e-07	3.36672e-07	4.51149e-07	0.8292	2.662	0.4984	0.8433	0.958	0.3953	0.8757
HSA-MIR-1184	29.0968	29.6686	29.4246	28.045	31.2521		29.8173	30.3583			29.6822	30.0122	29.1455	29.276	-0.0086981	-0.580524	-0.336498	1.04315	-2.16401	0	-0.729198	-1.27019	0	0	-0.594098	-0.924128	-0.0573781	-0.187858				48.5266											2.034	NaN	0.6163	1.065	1.778	0.2407	0.8476
HSA-MIR-4259	29.1048	32.4644	31.2566	31.131	28.9779	27.1093	30.0902	28.6811	32.3672	30.4831	28.0647	32.814	27.3243	27.6799	29.1048	32.4644	31.2566	31.131	28.9779	27.1093	30.0902	28.6811	32.3672	30.4831	28.0647	32.814	27.3243	27.6799	1.73216e-07	1.68749e-08	3.8978e-08	4.25226e-08	1.89138e-07	6.90683e-07	8.74884e-08	2.32341e-07	1.80509e-08	6.6629e-08	3.56184e-07	1.32437e-08	5.95047e-07	4.65078e-07	2.238	1.194	2.41	3.616	0.2834	1.289	0.7764
HSA-MIR-29C	29.1096	29.0368	27.5539	27.8666	24.9006	24.3596	26.8001	26.3643	28.7097	29.3816	26.5914	27.0151	25.0904	26.0286	29.1096	29.0368	27.5539	27.8666	24.9006	24.3596	26.8001	26.3643	28.7097	29.3816	26.5914	27.0151	25.0904	26.0286	1.72636e-07	1.81573e-07	5.07519e-07	4.08604e-07	3.19289e-06	4.64544e-06	8.55805e-07	1.15757e-06	2.27788e-07	1.42977e-07	9.88954e-07	7.37316e-07	2.7992e-06	1.46083e-06	0.3276	0.3764	1.665	1.475	0.4479	3.196	1.116
HSA-MIR-593*	29.1274	0		30.731	31.6573		31.5957	30.4581	34.5916	29.1471	28.7375		29.3068	26.5242	-0.993202	0	0	-2.59688	-3.52315	0	-3.46153	-2.32396	-6.45749	-1.01292	-0.603368	0	-1.17264	1.60993														32.7614	2.728	3.733	0.7551	2.809	NaN	0.2491	0.3386
HSA-MIR-127-3P	29.1296	32.3883	30.9511	30.9712	28.9012	26.5799	31.2988	29.3876	32.6075	30.6694	26.7346	30.1652	28.1415	26.923	29.1296	32.3883	30.9511	30.9712	28.9012	26.5799	31.2988	29.3876	32.6075	30.6694	26.7346	30.1652	28.1415	26.923	1.70261e-07	1.77886e-08	4.81725e-08	4.75044e-08	1.99462e-07	9.9691e-07	3.78557e-08	1.42385e-07	1.52812e-08	5.85594e-08	8.95506e-07	8.30552e-08	3.37714e-07	7.85904e-07	1.925	0.9183	1.197	7.954	0.2614	1.189	0.2939
HSA-MIR-1208	29.1552	28.797	31.1804	30.5133	30.4244	32.256	30.0472	30.0162	31.2986	30.5449	32.0905	30.031	30.2328	29.1007	-0.246771	0.111442	-2.27195	-1.60486	-1.51596	-3.34758	-1.13884	-1.10782	-2.39017	-1.63653	-3.18211	-1.12258	-1.32436	-0.192315		92.5662													3.234	1.712	0.4803	0.3322	5.388	0.7076	1.197
HSA-MIR-221	29.1582	28.1402	28.7876	31.9072	26.4789	25.4749	27.3796	26.5226	29.6347	28.951	26.8874	28.3911	26.8486	26.0398	29.1582	28.1402	28.7876	31.9072	26.4789	25.4749	27.3796	26.5226	29.6347	28.951	26.8874	28.3911	26.8486	26.0398	1.66924e-07	3.38031e-07	2.15806e-07	2.48296e-08	1.0692e-06	2.14437e-06	5.72705e-07	1.03726e-06	1.19967e-07	1.92695e-07	8.0556e-07	2.84075e-07	8.27468e-07	1.44953e-06	0.568	0.9096	0.8827	2.154	1.495	1.919	1.339
HSA-MIR-2277-3P	29.2103	30.4553		34.546	32.1234	29.5549	31.744	30.5568		32.3127	29.2428			32.8308	-0.495777	-1.74081	0	-5.83152	-3.40892	-0.840387	-3.02954	-1.84234	0	-3.59819	-0.528277	0	0	-4.11635															5.453	0.8808	NaN	5.059	2.991	0.3818	0.6468
HSA-MIR-600	29.2399	30.0814	29.0549	29.7725	33.4817		29.7137	28.2434	32.6936	29.6931	31.3572	29.8946	29.8025	30.2781	0.911163	0.0696926	1.09619	0.378504	-3.33068	0	0.437384	1.90769	-2.54253	0.457904	-1.20615	0.256494	0.348544	-0.126996	53.1756	95.2841	46.7749	76.9235			73.8472	26.6518		72.8043		83.712	78.5376		2.556	2.589	0.5424	0.4628	1.854	0.07124	1.264
HSA-MIR-574-3P	29.2621	29.8139		30.793	28.7347	28.373	29.1937	28.6835	30.1468		27.7374	28.9119	27.7865	27.8101	1.84957	1.29776	0	0.31872	2.37701	2.7387	1.91804	2.4282	0.96493	0	3.37432	2.19985	3.32516	3.30156	27.7475	40.6757		80.1781	19.2508	14.982	26.4614	18.5797	51.2303		9.64336	21.766	9.97762	10.1422	1.144	NaN	0.9973	2.587	1.014	0.8697	0.8239
HSA-MIR-744	29.2905	30.4515	29.8187	31.182	28.8146	27.7179	30.5812	28.5879		29.5416	30.1837	29.5376	29.089	28.4129	29.2905	30.4515	29.8187	31.182	28.8146	27.7179	30.5812	28.5879	0	29.5416	30.1837	29.5376	29.089	28.4129	1.52293e-07	6.8107e-08	1.05605e-07	4.1048e-08	2.11803e-07	4.52975e-07	6.22512e-08	2.47854e-07		1.2797e-07	8.19976e-08	1.28323e-07	1.75126e-07	2.79819e-07	1.641	1.913	0.5915	0.6942	0.9539	1.204	0.4607
HSA-MIR-192*	29.293	28.8106	29.5501	29.5399	29.9791	32.8017	28.9392	31.379	29.3261	29.0657		29.8174			-0.559877	-0.0774479	-0.816923	-0.806753	-1.24597	-4.06858	-0.206023	-2.64583	-0.593003	-0.332583	0	-1.08426	0	0															1.834	2.978	NaN	NaN	3.33	0.6012	1.61
HSA-MIR-146A*	29.3107	32.4651	31.0994	32.3618	30.6899	29.2252	29.5294	31.1751	30.9647	30.0106	30.991	30.1633	32.0138	29.997	-0.152253	-3.30672	-1.94093	-3.20339	-1.53149	-0.0668233	-0.370973	-2.01667	-1.80625	-0.852143	-1.83254	-1.00489	-2.85533	-0.838623															3.594	3.069	0.173	0.8811	0.5246	0.7286	2.121
HSA-MIR-1539	29.3293	30.2004			29.7681	32.3109	29.8213	29.6332	29.6299	29.496	31.5998	30.451	31.4371		1.78671	0.915598	0	0	1.34789	-1.19485	1.29476	1.48288	1.48618	1.62009	-0.483815	0.665055	-0.321034	0	28.9832	53.0124			39.2867		40.7605	35.7775	35.6958	32.5316		63.0664			2.77	3.424	0.2015	0.4511	1.969	1.078	1.353
HSA-MIR-675	29.3453	31.3563		30.0337	27.1274	27.5341	29.4145	28.5389	32.6625	31.3839	29.2792	30.5117	26.6142	29.7221	29.3453	31.3563	0	30.0337	27.1274	27.5341	29.4145	28.5389	32.6625	31.3839	29.2792	30.5117	26.6142	29.7221	1.46613e-07	3.63752e-08		9.09795e-08	6.82062e-07	5.1454e-07	1.39753e-07	2.56419e-07	1.471e-08	3.56861e-08	1.53495e-07	6.53212e-08	9.73468e-07	1.12912e-07	1.515	0.5115	3.153	1.246	0.4886	3.717	0.9918
HSA-MIR-202*	29.4292	32.8089		31.6015	34.5152	32.6663	30.6265		32.1043		31.2123	31.329	32.0316	31.0302	0.208452	-3.17126	0	-1.96381	-4.87752	-3.02865	-0.988838	0	-2.4666	0	-1.57465	-1.69137	-2.39398	-1.39257	86.5465														7.042	NaN	0.3635	1.608	0.8794	0.1093	2.109
HSA-MIR-556-3P	29.4331	0						34.6584			30.1517				0.98129	0	0	0	0	0	0	-4.24406	0	0	0.26262	0	0	0	50.6527										83.3573				5.251	NaN	NaN	2.507	NaN	NaN	NaN
HSA-MIR-423-3P	29.4398	30.8274	28.6741	30.138	28.3047	26.2167	29.5167	27.9989	29.5553	31.4559	29.0767	29.1047	27.8931	27.2593	29.4398	30.8274	28.6741	30.138	28.3047	26.2167	29.5167	27.9989	29.5553	31.4559	29.0767	29.1047	27.8931	27.2593	1.37318e-07	5.24841e-08	2.33476e-07	8.46383e-08	3.01597e-07	1.2823e-06	1.3019e-07	3.72813e-07	1.26752e-07	3.39505e-08	1.76617e-07	1.7323e-07	4.01184e-07	6.225e-07	0.9752	0.3345	0.8931	0.9855	0.4845	1.13	0.635
HSA-MIR-323-3P	29.457	0			29.906	26.3892	29.6786			30.9201	28.1062		27.8308	28.8569	2.29528	0	0	0	1.84631	5.36307	2.07366	0	0	0.832165	3.64612	0	3.92144	2.8954	20.3729				27.8104	2.42972	23.7557			56.1686	7.98748		6.59979	13.44	1.1	0.5536	1.065	2.205	NaN	0.4251	0.6481
HSA-MIR-559	29.4609	0				29.4714	31.3325	31.3076	31.4353		28.8676		28.8131	27.1819	-0.223658	0	0	0	0	-0.234162	-2.09521	-2.07037	-2.19804	0	0.369658	0	0.424108	2.05534											77.3966		74.5299	24.0592	1.926	NaN	0.946	2.283	NaN	NaN	0.3615
HSA-MIR-1290	29.5157	29.0653	28.7959	28.8964	27.0409	25.4709	27.8768	27.0586	30.8267	27.6116	26.3588	28.2754	26.6308	26.0026	29.5157	29.0653	28.7959	28.8964	27.0409	25.4709	27.8768	27.0586	30.8267	27.6116	26.3588	28.2754	26.6308	26.0026	1.30286e-07	1.78026e-07	2.14569e-07	2.00134e-07	7.24243e-07	2.15025e-06	4.05748e-07	7.15382e-07	5.25103e-08	4.87629e-07	1.162e-06	3.07781e-07	9.62371e-07	1.48747e-06	0.4183	2.172	0.9685	2.931	0.7429	1.226	0.8947
HSA-MIR-3714	29.5312	29.0077	29.5957	29.275	28.6279	30.0393	29.6926	29.2184	30.1022	28.5337	30.786	28.7794	29.6577	28.6214	-0.090468	0.433004	-0.15497	0.16571	0.81276	-0.59865	-0.25185	0.22228	-0.66147	0.90705	-1.34528	0.66129	-0.21698	0.81929		74.0718		89.149	56.9292			85.721		53.3274		63.2313		56.6721	1.232	3.413	0.3539	0.4058	2.303	1.216	0.7569
HSA-MIR-148B	29.5459	29.9716	29.6537	29.9362	27.0664	26.381	27.231	27.3985	31.1625	29.4138	28.2954	27.6561	26.7531	27.9398	29.5459	29.9716	29.6537	29.9362	27.0664	26.381	27.231	27.3985	31.1625	29.4138	28.2954	27.6561	26.7531	27.9398	1.27588e-07	9.49834e-08	1.18395e-07	9.73466e-08	7.11549e-07	1.14424e-06	6.34836e-07	5.65251e-07	4.16068e-08	1.39817e-07	3.03543e-07	4.72807e-07	8.84127e-07	3.88413e-07	0.6389	0.9713	1.388	1.194	0.6183	1.879	2.183
HSA-MIR-483-3P	29.5581	28.4238	25.3232	30.2796		32.7914	27.7792		32.0555	25.2438	30.2181	26.9351	28.3077	29.1227	29.5581	28.4238	25.3232	30.2796	0	32.7914	27.7792	0	32.0555	25.2438	30.2181	26.9351	28.3077	29.1227	1.26507e-07	2.77697e-07	2.38207e-06	7.67247e-08		1.34523e-08	4.3415e-07		2.24047e-08	2.51691e-06	8.00655e-08	7.79367e-07	3.00977e-07	1.71084e-07	0.781	21.55	0.5824	0.3884	2.228	NaN	1.841
HSA-MIR-145	29.5812	31.5458	30.4541		28.8472	28.1198	30.2539	30.0235	31.3573	29.78	29.0705	32.4181	30.2242	28.9484	29.5812	31.5458	30.4541	0	28.8472	28.1198	30.2539	30.0235	31.3573	29.78	29.0705	32.4181	30.2242	28.9484	1.24499e-07	3.18982e-08	6.79819e-08		2.07069e-07	3.42837e-07	7.8101e-08	9.16301e-08	3.63506e-08	1.08471e-07	1.77377e-07	1.74251e-08	7.97294e-08	1.93054e-07	1.941	2.346	0.3896	2.173	0.6464	1.703	0.8363
HSA-MIR-367*	29.5827	32.1413	32.4632	32.8765	33.4454		33.1839	33.0596	32.2634	31.6699	31.6026	32.2824			1.06915	-1.48953	-1.81137	-2.22473	-2.79356	0	-2.53213	-2.40783	-1.61156	-1.01805	-0.950782	-1.63064	0	0	47.6599														7.087	2.314	NaN	1.373	1.564	0.2569	0.4011
HSA-MIR-3690	29.5871	32.7168	29.6865	29.8444	32.2464	34.0442	32.0202	29.7102	29.2475	29.1554	32.1665		32.2953	31.2234	-0.376582	-3.50626	-0.47595	-0.63389	-3.03587	-4.83362	-2.80966	-0.49963	-0.03698	0.05518	-2.95597	0	-3.08481	-2.01287										96.2474					3.796	7.104	0.1821	0.4991	0.5638	0.3169	0.4828
HSA-MIR-1180	29.6019	30.2333	29.1883	30.3307	30.1956	30.0225	30.2941	29.583	31.0697	30.3934	30.7883	31.7213	29.8629	30.7529	-1.13817	-1.76955	-0.72451	-1.86697	-1.7318	-1.55872	-1.83035	-1.11924	-2.60592	-1.92965	-2.32451	-3.25757	-1.39912	-2.28913															2.186	1.752	0.572	0.7549	1.835	0.7641	0.9294
HSA-MIR-151-3P	29.6504	27.8603	27.9589	29.4993	29.5062	27.3212	27.5021	27.4576	28.9946	29.4118	27.7625	27.967	27.2096	27.7145	-1.78376	0.0063576	-0.09228	-1.63264	-1.63957	0.54542	0.36457	0.40901	-1.12796	-1.5451	0.10412	-0.10035	0.65706	0.15211		99.5603				68.5192	77.67	75.314			93.0372		63.4169	89.9933	0.5228	0.8557	0.8897	1.52	2.35	0.3047	1.592
HSA-MIR-16-2*	29.6694	28.199	27.4119	27.2838	27.3051	25.7279	26.3377	27.2557	27.2471	29.7051	29.5333	26.2731	25.5565	28.6387	29.6694	28.199	27.4119	27.2838	27.3051	25.7279	26.3377	27.2557	27.2471	29.7051	29.5333	26.2731	25.5565	28.6387	1.17117e-07	3.24538e-07	5.59998e-07	6.12013e-07	6.03035e-07	1.79941e-06	1.17917e-06	6.24055e-07	6.27777e-07	1.14256e-07	1.28702e-07	1.2331e-06	2.02646e-06	2.39272e-07	0.3196	0.4325	1.734	0.276	1.151	0.8679	2.21
RNU2-1	29.6739	29.58	28.7278	25.5017	24.7165	24.777	26.9024	24.0982	28.4844	27.3962	27.1097	27.7399	21.3635	26.0007	29.6739	29.58	28.7278	25.5017	24.7165	24.777	26.9024	24.0982	28.4844	27.3962	27.1097	27.7399	21.3635	26.0007	1.16756e-07	1.24604e-07	2.24944e-07	2.10486e-06	3.62747e-06	3.47847e-06	7.97184e-07	5.56833e-06	2.66274e-07	5.66134e-07	6.90496e-07	4.46133e-07	3.70634e-05	1.48941e-06	0.1587	1.068	15.8	0.7377	0.2202	2.601	0.7444
HSA-MIR-144*	29.6808	30.7177	31.807	28.6679	29.1414	28.7394	29.7813	28.4933	30.5254	31.0228	29.9187	30.7145	25.7578	31.9232	29.6808	30.7177	31.807	28.6679	29.1414	28.7394	29.7813	28.4933	30.5254	31.0228	29.9187	30.7145	25.7578	31.9232	1.16194e-07	5.6632e-08	2.66163e-08	2.34481e-07	1.68871e-07	2.23137e-07	1.08373e-07	2.64646e-07	6.47034e-08	4.58363e-08	9.85292e-08	5.67551e-08	1.76251e-06	2.45552e-08	1.453	0.7952	6.91	0.9682	0.9206	1.114	0.9309
HSA-MIR-708	29.6918	30.6726	31.2414		31.5165	31.848	30.9808	29.9238	30.3045	30.0055		30.5868	32.4184	29.4103	-1.38561	-2.36647	-2.93521	0	-3.21031	-3.54181	-2.67462	-1.61765	-1.99832	-1.69932	0	-2.28067	-4.11223	-1.10415															2.881	3.216	0.1364	NaN	1.898	0.429	0.8098
HSA-MIR-3142	29.6922	30.0089	30.3599	31.4114	27.9261	27.069	30.2248	30.2033	30.2667	29.8739	28.8517	32.354	28.5698	28.9911	-1.64899	-1.96573	-2.31666	-3.36823	0.117052	0.974242	-2.18163	-2.16012	-2.22347	-1.83068	-0.808508	-4.31078	-0.526648	-0.947898					92.207	50.9007									1.366	1.671	0.9322	1.922	1.426	2.451	0.6486
HSA-MIR-374A	29.7022	32.7833	28.6278	30.7973	29.9204	27.2673	30.5667	28.4818	30.2065	30.1741	29.9868	28.6105	27.139	29.4893	29.7022	32.7833	28.6278	30.7973	29.9204	27.2673	30.5667	28.4818	30.2065	30.1741	29.9868	28.6105	27.139	29.4893	1.14482e-07	1.3528e-08	2.41083e-07	5.35895e-08	9.84179e-08	6.1907e-07	6.288e-08	2.66762e-07	8.0713e-08	8.25456e-08	9.39857e-08	2.44e-07	6.76609e-07	1.32688e-07	1.226	1.226	2.271	0.7907	0.1883	0.5557	0.4624
HSA-MIR-941	29.7041	29.9338	28.3252	30.7633	31.0287	29.406	30.1492	30.3223	29.0176	29.3282	30.1379	30.7472	29.6755	30.7513	29.7041	29.9338	28.3252	30.7633	31.0287	29.406	30.1492	30.3223	29.0176	29.3282	30.1379	30.7472	29.6755	30.7513	1.14337e-07	9.75071e-08	2.97348e-07	5.48671e-08	4.56502e-08	1.40576e-07	8.39826e-08	7.44851e-08	1.84007e-07	1.48362e-07	8.46424e-08	5.5484e-08	1.16627e-07	5.53269e-08	1.61	2.899	0.5149	0.9367	1.785	0.3391	0.8124
HSA-MIR-3184	29.7088	29.0107	28.1552	29.0005	25.888	24.4696	28.6363	27.9334	29.492	28.569	25.8249	28.9041	26.5142	26.011	-0.166281	0.531837	1.38737	0.542105	3.65459	5.07292	0.906265	1.60915	0.0505949	0.973525	3.71769	0.638455	3.02839	3.53157		69.1673	38.226	68.6768	7.94067	2.97096	53.3565	32.779	96.5538	50.926	7.60085	64.2401	12.2564	8.64749	0.3429	1.048	0.9842	3.978	0.7232	2.556	0.4953
HSA-MIR-1237	29.7091	29.4147			29.2992		30.6654				31.6525	29.3856		33.8179	29.7091	29.4147	0	0	29.2992	0	30.6654	0	0	0	31.6525	29.3856	0	33.8179	1.13935e-07	1.39732e-07			1.51376e-07		5.87208e-08				2.96241e-08	1.42574e-07		6.604e-09	2.371	NaN	NaN	0.4844	3.779	1.661	0.8392
HSA-MIR-544B	29.7101	31.3793	31.2576	30.2356	30.328	30.0196	30.2471	29.7984	31.5585	29.2642	28.505	30.3474	30.8133	29.7588	-1.44632	-3.1155	-2.99383	-1.97178	-2.0642	-1.75584	-1.98336	-1.5346	-3.29471	-1.00037	-0.241223	-2.08359	-2.54948	-1.49503															1.948	3.682	0.2843	3.529	0.7963	0.6695	0.9222
HSA-MIR-130A	29.7225	29.1609	29.089	31.5288	28.5137	28.6807	27.9648	26.8781	32.4759	31.249	30.0883	27.8704	26.97	28.7671	29.7225	29.1609	29.089	31.5288	28.5137	28.6807	27.9648	26.8781	32.4759	31.249	30.0883	27.8704	26.97	28.7671	1.12883e-07	1.66611e-07	1.75117e-07	3.22762e-08	2.60921e-07	2.32407e-07	3.81719e-07	8.10764e-07	1.67409e-08	3.91839e-08	8.76e-08	4.07552e-07	7.60719e-07	2.18903e-07	0.9533	0.459	2.014	0.5813	1.829	1.162	2.214
HSA-MIR-1296	29.7765	30.8966	32.1338			32.8276	30.8614	31.1233		30.7162	30.8146	31.4017	30.7184	29.8291	29.7765	30.8966	32.1338	0	0	32.8276	30.8614	31.1233	0	30.7162	30.8146	31.4017	30.7184	29.8291	1.08735e-07	5.00254e-08	2.12207e-08			1.31192e-08	5.12603e-08	4.27505e-08		5.66887e-08	5.29504e-08	3.52497e-08	5.66047e-08	1.04846e-07	3.454	2.498	0.5636	1.322	2.066	NaN	1.118
HSA-MIR-29B-2*	29.7772	34.2843	29.7273	31.6273	31.2891	32.0344	31.6171	31.4953	31.9182	31.3088	30.059	31.9086	32.8429	31.6533	29.7772	34.2843	29.7273	31.6273	31.2891	32.0344	31.6171	31.4953	31.9182	31.3088	30.059	31.9086	32.8429	31.6533	1.08687e-07	4.77956e-09	1.12512e-07	3.01459e-08	3.81098e-08	2.27337e-08	3.03604e-08	3.30351e-08	2.46407e-08	3.75932e-08	8.93985e-08	2.48052e-08	1.29812e-08	2.96077e-08	4.607	2.21	0.1725	2.977	0.2633	0.8519	0.8838
HSA-MIR-196B	29.7886	31.2655	30.3272	29.5551	31.4135	28.9888	29.6225	29.1252	30.3456	30.8411	30.0098	31.2926	29.3293	29.6194	0.550816	-0.926037	0.0122532	0.784383	-1.07405	1.35064	0.716993	1.2142	-0.0061468	-0.501657	0.329603	-0.953187	1.01013	0.720083	68.2634		99.1543	58.06		39.2117	60.8364	43.1011			79.5755		49.65	60.7062	1.696	1.134	0.731	1.143	0.7921	0.2901	1.307
HSA-MIR-4254	29.7977	29.7944	27.7603	29.8933	30.8981	29.3314	28.7098	28.9097	30.0049	29.6177	30.2182	29.5284	28.7695	28.124	29.7977	29.7944	27.7603	29.8933	30.8981	29.3314	28.7098	28.9097	30.0049	29.6177	30.2182	29.5284	28.7695	28.124	1.07153e-07	1.07398e-07	4.39869e-07	1.00279e-07	4.99734e-08	1.48036e-07	2.27772e-07	1.98297e-07	9.28178e-08	1.21393e-07	8.006e-08	1.29137e-07	2.18533e-07	3.41838e-07	1.019	1.601	0.6514	0.5982	1.327	0.2506	1.488
HSA-MIR-563	29.8128	29.7808	30.6172	30.1539	30.5627	29.676	31.1065	32.0789	31.5284	31.6976			29.6182	30.9453	1.33191	1.36386	0.527464	0.990774	0.581944	1.46869	0.0382043	-0.934216	-0.383726	-0.552966	0	0	1.52649	0.199354	39.7243	38.8542	69.3773	50.3208	66.8063	36.1309	97.3866						34.712	87.094	2.404	0.903	0.8624	NaN	3.195	0.7539	0.6735
HSA-MIR-642B	29.8222	0			31.037						30.6928	31.0307	33.4374	30.4934	-0.273724	0	0	0	-1.48846	0	0	0	0	0	-1.14427	-1.48215	-3.88893	-0.94488															3.921	NaN	0.1003	1.685	NaN	0.8909	NaN
HSA-MIR-30A*	29.8506	31.02	30.8431		30.9538	31.0168				31.2049		31.8187	30.5508	32.1382	1.06656	-0.102861	0.0741367	0	-0.0366533	-0.0996033	0	0	0	-0.287683	0	-0.901553	0.366417	-1.22101	47.7455		94.991										77.5707		3.429	1.861	0.6616	NaN	1.982	0.8419	NaN
HSA-MIR-96*	29.8511	30.077	30.2741			30.5141	30.7102			29.7069		31.0272	30.1874	30.5739	-0.622457	-0.848387	-1.04547	0	0	-1.28545	-1.4816	0	0	-0.478242	0	-1.79855	-0.958762	-1.34523															2.022	3.1	0.502	NaN	2.247	NaN	0.7655
HSA-MIR-361-5P	29.8537	32.7537	31.5735	30.5245	29.477	27.8185	32.2376	31.4595	31.4215		29.9989	29.88	29.5253	28.8866	29.8537	32.7537	31.5735	30.5245	29.477	27.8185	32.2376	31.4595	31.4215	0	29.9989	29.88	29.5253	28.8866	1.03069e-07	1.38085e-08	3.12919e-08	6.4746e-08	1.33822e-07	4.22483e-07	1.97482e-08	3.38642e-08	3.47697e-08		9.32033e-08	1.0121e-07	1.29422e-07	2.01493e-07	2.107	NaN	0.8291	1.497	0.3668	1.442	0.2772
HSA-MIR-30D*	29.8547	31.6491	31.7958	31.3605	30.7304	30.3685	31.1278	32.343	29.8507	29.926	30.5401	30.7659	30.008	29.2103	2.30725	0.512844	0.36615	0.80147	1.4316	1.79352	1.03419	-0.18101	2.31128	2.23595	1.6219	1.3961	2.15399	2.95164	20.2046	70.0839	77.585	57.3764	37.072	28.8467	48.829		20.1482	21.2281	32.4907	37.9955	22.469	12.9261	2.409	3.18	0.6789	1.177	0.9025	0.6923	0.6845
HSA-MIR-3656	29.8673	30.6756	32.4464	29.5701	29.3972	28.8205		30.0488	31.8523	29.3804	30.0334	30.512	29.1308	31.4705	29.8673	30.6756	32.4464	29.5701	29.3972	28.8205	0	30.0488	31.8523	29.3804	30.0334	30.512	29.1308	31.4705	1.02105e-07	5.8308e-08	1.70874e-08	1.25461e-07	1.41432e-07	2.10947e-07		9.00353e-08	2.57928e-08	1.43095e-07	9.10034e-08	6.53103e-08	1.70121e-07	3.36079e-08	1.758	3.417	0.918	1.231	1.305	1.284	NaN
HSA-MIR-296-5P	29.8902	0	29.3098	30.0646	29.9954	29.2878	31.1584	29.4787	29.393	29.2986	32.8901	31.3508	29.4625		-1.16191	0	-0.581509	-1.33637	-1.26716	-0.559539	-2.43014	-0.750449	-0.664769	-0.570329	-4.16185	-2.62254	-0.734209	0															1.648	3.444	0.6946	0.1618	NaN	0.8078	0.4698
HSA-MIR-195*	29.8936	0			29.3762	29.7142	29.9625	31.0105	32.1835	28.6024	28.8334	29.5654	28.4303	29.9575	29.8936	0	0	0	29.3762	29.7142	29.9625	31.0105	32.1835	28.6024	28.8334	29.5654	28.4303	29.9575	1.00264e-07				1.43509e-07	1.13536e-07	9.55874e-08	4.62288e-08	2.05025e-08	2.45372e-07	2.09065e-07	1.25869e-07	2.76462e-07	9.59173e-08	1.372	4.657	1.186	2.247	NaN	1.035	0.8981
HSA-MIR-10A	29.9007	29.608	28.0067	29.1062	30.0623	28.6873	29.7187	30.0978	29.3885	29.9885	29.5472	31.8474	29.1004	29.481	29.9007	29.608	28.0067	29.1062	30.0623	28.6873	29.7187	30.0978	29.3885	29.9885	29.5472	31.8474	29.1004	29.481	9.97666e-08	1.22211e-07	3.70811e-07	1.73043e-07	8.91949e-08	2.31345e-07	1.13183e-07	8.70287e-08	1.42291e-07	9.38769e-08	1.2747e-07	2.58813e-08	1.73746e-07	1.33458e-07	1.111	1.45	0.6063	1.115	1.768	0.5237	0.8654
HSA-MIR-663	29.9223	30.6741	28.8328	31.0408	27.5343	26.687	29.4802	28.7438	31.021	29.1717	27.7058	29.9601	27.9758	27.7051	29.9223	30.6741	28.8328	31.0408	27.5343	26.687	29.4802	28.7438	31.021	29.1717	27.7058	29.9601	27.9758	27.7051	9.82886e-08	5.83674e-08	2.09146e-07	4.52686e-08	5.14454e-07	9.25564e-07	1.33529e-07	2.22456e-07	4.58929e-08	1.65368e-07	4.56797e-07	9.57453e-08	3.78823e-07	4.57006e-07	0.7332	1.711	0.8858	2.678	0.566	2.024	0.6841
HSA-MIR-337-5P	29.928	30.9308			30.8838	29.7361		29.839	30.0394	29.7476	30.6239		32.2751		0.10252	-0.900257	0	0	-0.853267	0.294473	0	0.191513	-0.0088572	0.282893	-0.593327	0	-2.24461	0	93.1405					81.537		87.5687		82.1941					1.961	3.082	0.1208	0.9512	1.272	0.5332	NaN
HSA-MIR-1279	29.9293	0	32.3014				33.3453		34.7032	31.3072	32.8666			30.4399	2.80516	0	0.433048	0	0	0	-0.610802	0	-1.96874	1.42724	-0.132082	0	0	2.29457	14.3075		74.0695							37.1842				20.3829	5.07	2.706	NaN	0.5201	NaN	NaN	0.3262
HSA-MIR-1276	29.9311	0	30.0658	31.5082		30.5167	31.1018	30.4969	32.1065	31.0109	33.3732			31.161	-0.69491	0	-0.829622	-2.27205	0	-1.2805	-1.8656	-1.26076	-2.87034	-1.77476	-4.137	0	0	-1.92484															2.918	1.915	NaN	0.211	NaN	NaN	0.8903
HSA-MIR-615-5P	29.9342	31.3682	30.3906	32.9769	31.7224	29.3369	30.1096	30.9179	31.5445	30.7821	30.7474	31.1968	31.8425		-0.0761041	-1.5101	-0.53248	-3.11879	-1.8643	0.52121	-0.25146	-1.05984	-1.68642	-0.924	-0.88931	-1.33874	-1.98443	0						69.6787									2.768	2.133	0.2311	1.238	1.331	0.4226	1.683
HSA-MIR-1267	29.9343	0	31.522	30.5132	30.1533	31.4826	31.2759		31.425	30.143	30.3944	31.1481		34.9286	0.309343	0	-1.27834	-0.269498	0.0903819	-1.23891	-1.03227	0	-1.18136	0.100682	-0.150748	-0.904418	0	-4.68493	80.7009				93.9274					93.2592					3.041	3.651	NaN	1.737	NaN	1.378	0.8241
HSA-MIR-3943	29.9344	29.0057	28.4823	28.921	28.2997		29.8722	27.9061	29.8783	29.9897			27.481	28.9868	29.9344	29.0057	28.4823	28.921	28.2997	0	29.8722	27.9061	29.8783	29.9897	0	0	27.481	28.9868	9.74677e-08	1.85534e-07	2.66677e-07	1.96751e-07	3.0264e-07		1.01757e-07	3.97582e-07	1.01332e-07	9.37982e-08			5.33835e-07	1.87979e-07	0.6458	0.8622	1.109	NaN	1.598	1.058	0.4631
HSA-MIR-338-3P	29.9414	32.1055	30.0236	29.8309	28.6986	26.7559	30.0825	30.7269	34.6552	28.9935	28.0447	29.3466	27.7198	27.1101	0.0911827	-2.07292	0.0090257	0.201766	1.334	3.27671	-0.0498843	-0.694254	-4.62256	1.03907	1.98788	0.686046	2.31287	2.92255	93.8753		99.3763	86.9486	39.6668	10.3184				48.6643	25.211	62.1555	20.126	13.1894	1.053	2.818	1.54	3.081	0.3054	1.314	0.6559
HSA-MIR-2116*	29.9437	28.8099	30.4016	30.3742	29.022	27.6608	28.3215		29.1294	29.8673	27.3635		27.3513	27.6302	-3.44458	-2.31076	-3.90245	-3.87509	-2.5229	-1.1617	-1.82241	0	-2.63032	-3.36817	-0.864413	0	-0.852233	-1.13106															0.6076	0.8887	1.149	2.855	1.733	0.607	1.285
HSA-MIR-27B	29.9441	30.493	27.6061	28.2731	27.0156	26.6092	27.9278	27.0987	29.0394	28.7556	27.3763	28.4707	27.3458	26.4436	29.9441	30.493	27.6061	28.2731	27.0156	26.6092	27.9278	27.0987	29.0394	28.7556	27.3763	28.4707	27.3458	26.4436	9.68093e-08	6.61756e-08	4.89467e-07	3.08285e-07	7.37055e-07	9.76827e-07	3.91641e-07	6.958e-07	1.8125e-07	2.20643e-07	5.73997e-07	2.68824e-07	5.86245e-07	1.09568e-06	0.3601	1.139	0.6835	1.678	0.32	1.446	1.001
HSA-MIR-548U	29.9509	31.4194	31.2811	30.4288	29.0308	32.0262	30.2991	30.8472	30.4928	28.5921	30.1179	30.6003	30.9454	30.8821	-0.196419	-1.66486	-1.52662	-0.674321	0.723709	-2.27173	-0.544561	-1.09269	-0.738301	1.16244	-0.363341	-0.845771	-1.19091	-1.12756					60.5539					44.6757					1.979	7.042	0.3114	1.385	0.9297	1.975	1.068
HSA-MIR-517A	29.972	29.6167		31.2559	32.2892	31.3879	30.2125	30.8357	32.0465	29.7842	29.8619		32.0577	32.0505	29.972	29.6167	0	31.2559	32.2892	31.3879	30.2125	30.8357	32.0465	29.7842	29.8619	0	32.0577	32.0505	9.49567e-08	1.21471e-07		3.89961e-08	1.90533e-08	3.5589e-08	8.03747e-08	5.21823e-08	2.25446e-08	1.0816e-07	1.0249e-07		2.2371e-08	2.24828e-08	2.667	4.214	0.1969	2.262	4.435	0.2822	1.55
HSA-MIR-3922	29.9784	30.4876	29.8122	31.4805	30.0934	30.9304	30.56	29.2466	30.986	31.1435	32.5375	31.3499	32.3584	30.5102	-0.217552	-0.726726	-0.0513286	-1.71964	-0.332569	-1.16957	-0.799179	0.514271	-1.22517	-1.38263	-2.77666	-1.5891	-2.59755	-0.749379								70.0146							2.434	1.506	0.1466	0.3245	2.223	1.185	1.117
HSA-MIR-3938	29.9853	34.0626		31.2014			33.2919	32.8753		33.7634	32.4944	33.9506	33.055		0.353106	-3.72416	0	-0.862954	0	0	-2.95345	-2.53685	0	-3.42503	-2.15603	-3.61219	-2.71656	0	78.2897														8.451	0.8545	0.3155	1.166	0.6508	NaN	0.5866
HSA-MIR-182	29.9871	30.2912	29.3573	29.6991	28.3212	30.435	29.6436	27.7563	30.6663		28.9571	29.887	27.9287	29.6035	29.9871	30.2912	29.3573	29.6991	28.3212	30.435	29.6436	27.7563	30.6663	0	28.9571	29.887	27.9287	29.6035	9.39713e-08	7.61078e-08	1.45408e-07	1.14728e-07	2.98176e-07	6.88913e-08	1.19232e-07	4.41096e-07	5.86846e-08		1.91885e-07	1.00717e-07	3.91416e-07	1.22588e-07	0.9666	NaN	1.262	1.551	1.018	1.618	0.8423
HSA-MIR-32	30.0144	30.5464	28.9957	29.6352	27.5879	28.0343	28.6771	28.6907	29.7528	28.9862	28.0735	28.2279	27.6183	29.061	-1.22005	-1.75204	-0.201357	-0.840837	1.20637	0.759993	0.117263	0.103623	-0.958467	-0.191907	0.720793	0.566453	1.17598	-0.266667					43.3357	59.0499	92.1935	93.0693			60.6764	67.5275	44.2582		0.6062	1.715	1	1.829	0.5449	1.719	1.052
HSA-MIR-29B	30.0202	29.0316	28.4575	28.0245	25.7025	25.0717	27.5467	26.4602	28.151	30.4029	27.6063	28.4181	25.698	26.8905	0.046583	1.03525	1.60928	2.04226	4.36429	4.99506	2.52012	3.60656	1.9158	-0.336057	2.46052	1.6487	4.36879	3.17628	96.8227	48.7931	32.7761	24.2783	4.85531	3.13571	17.4328	8.20949	26.5024		18.1681	31.8927	4.84019	11.0623	0.2678	0.2849	1.679	1.121	0.6907	2.816	1.021
HSA-MIR-4285	30.0615	0	31.9624	34.6807	34.3148	29.9376	31.1457		34.8747		32.0326	33.5223			30.0615	0	31.9624	34.6807	34.3148	29.9376	31.1457	0	34.8747	0	32.0326	33.5223	0	0	8.9244e-08		2.38972e-08	3.63141e-09	4.67977e-09	9.72509e-08	4.20921e-08		3.17448e-09		2.27621e-08	8.10554e-09			7.203	NaN	NaN	1.443	NaN	0.1992	2.333
HSA-MIR-875-5P	30.0677	31.9615	30.7258	29.9493	29.9084	30.8914	32.3164	30.7898	28.9065	29.651	30.1021	30.0414	30.7366	30.4443	-0.733068	-2.62679	-1.39108	-0.614595	-0.573735	-1.55671	-2.98176	-1.4551	0.428205	-0.316315	-0.767425	-0.706725	-1.40189	-1.10958									74.3186						1.788	3.31	0.3525	1.372	0.6253	1.053	0.2583
HSA-MIR-877*	30.096	26.5122	24.0977	29.6664	30.5605	30.9113	25.6447	25.5356	30.1407	24.1108	28.5686	24.7343	26.3321		30.096	26.5122	24.0977	29.6664	30.5605	30.9113	25.6447	25.5356	30.1407	24.1108	28.5686	24.7343	26.3321	0	8.71358e-08	1.04482e-06	5.5703e-06	1.17359e-07	6.31517e-08	4.95196e-08	1.90619e-06	2.05602e-06	8.44783e-08	5.51991e-06	2.51182e-07	3.58297e-06	1.18371e-06		0.2134	18.75	0.9087	0.4833	3.326	0.08156	3.206
HSA-MIR-26B*	30.1157	30.2338	31.5954	29.6981	28.9111	28.2748	30.632	31.5109	29.9947	30.4149	28.9244	30.4209	30.0157	30.3276	-2.19669	-2.31482	-3.67642	-1.77917	-0.992088	-0.355818	-2.71299	-3.59188	-2.0757	-2.49588	-1.00544	-2.50196	-2.09669	-2.40864															1.322	1.491	0.4442	2.372	1.583	1.607	0.6349
HSA-MIR-2277-5P	30.1206	0	28.5511	29.0652	29.8215	28.825	29.3026	28.7356	30.75	30.1997	29.9998	29.4653	29.6864	29.0591	30.1206	0	28.5511	29.0652	29.8215	28.825	29.3026	28.7356	30.75	30.1997	29.9998	29.4653	29.6864	29.0591	8.56623e-08		2.54249e-07	1.78035e-07	1.05398e-07	2.1028e-07	1.51017e-07	2.23734e-07	5.53768e-08	8.10932e-08	9.31465e-08	1.34912e-07	1.15742e-07	1.78788e-07	0.9272	1.218	0.3927	0.7922	NaN	0.6016	1.123
HSA-MIR-485-3P	30.1684	0	31.1359	32.5422		32.3663	33.6045	31.0134	34.0987	29.8641	30.8489	33.472	32.4908		-0.966846	0	-1.9343	-3.3406	0	-3.16473	-4.40289	-1.81187	-4.89711	-0.66257	-1.64735	-4.27042	-3.28918	0															4.705	8.059	0.2949	2.307	NaN	NaN	0.2986
HSA-MIR-1274A	30.1731	30.6054	28.479	31.9391	30.5114	29.2523	29.6185	30.0325	30.7415	31.8134	31.0183	31.8595	29.5333	30.3682	3.47811	3.04584	5.17223	1.7121	3.13983	4.39893	4.03276	3.61873	2.90972	1.83778	2.63289	1.79169	4.11792	3.28304	8.974	12.1091	2.77334	30.5215	11.3453	4.74013	6.10968	8.14055	13.3072	27.9752	16.1221	28.8834	5.75947	10.2732	1.617	0.7197	0.7899	0.7074	1.558	0.6747	1.632
HSA-MIR-487B	30.1749	0	32.2411	29.4417	31.1603	34.0054	31.6239	31.4018	30.7718	30.3384		31.2273	31.0409	30.1712	-1.30387	0	-3.37012	-0.57071	-2.28932	-5.13435	-2.75293	-2.53079	-1.90082	-1.46742	0	-2.35629	-2.16988	-1.30023															2.783	3.447	0.4786	NaN	NaN	0.7413	0.7001
HSA-MIR-493*	30.1783	0	33.8206			29.9287	31.4407								30.1783	0	33.8206	0	0	29.9287	31.4407	0	0	0	0	0	0	0	8.23042e-08		6.59146e-09			9.7852e-08	3.431e-08								3.61	NaN	NaN	NaN	NaN	NaN	1.034
HSA-MIR-378B	30.1933	31.9116	30.6668		31.5486		31.313	30.7031	31.7288	30.5788	30.4976	30.6104	31.3889		0.99714	-0.721114	0.52368	0	-0.35815	0	-0.12254	0.48741	-0.53828	0.61164	0.6929	0.58005	-0.19843	0	50.0992		69.5595					71.3305		65.4452	61.8609	66.8941			2.238	2.376	0.3063	1.424	0.884	0.4613	0.7073
HSA-MIR-380	30.2088	0	30.7246					29.9988	33.8705					30.7534	30.2088	0	30.7246	0	0	0	0	29.9988	33.8705	0	0	0	0	30.7534	8.05827e-08		5.63596e-08					9.3213e-08	6.36724e-09					5.52483e-08	2.293	NaN	NaN	NaN	NaN	NaN	NaN
HSA-MIR-31	30.2204	33.8773			34.8304		32.0217	30.5991			31.1205	34.3038	32.801		30.2204	33.8773	0	0	34.8304	0	32.0217	30.5991	0	0	31.1205	34.3038	32.801	0	7.99389e-08	6.33761e-09			3.27333e-09		2.29356e-08	6.14831e-08			4.28335e-08	4.71566e-09	1.33635e-08		7.017	NaN	0.3677	2.954	0.7231	0.1515	1.383
HSA-MIR-130A*	30.2204	29.1707		28.4336	29.9362	29.4038	30.1168	31.0663	29.2114	29.1172	29.4884	28.704	29.3107	29.9404	-2.59592	-1.54626	0	-0.80917	-2.31171	-1.77935	-2.49234	-3.44181	-1.58694	-1.49277	-1.8639	-1.07958	-1.68624	-2.31591															0.8527	2.541	0.5021	1.113	2.294	0.5476	0.6292
HSA-MIR-3620	30.2209	0	27.9337	33.8835	33.1306	32.7454			32.5675		30.3458				30.2209	0	27.9337	33.8835	33.1306	32.7454	0	0	32.5675	0	30.3458	0	0	0	7.99119e-08		3.90046e-07	6.31008e-09	1.06341e-08	1.38884e-08			1.57108e-08		7.32836e-08				3.254	NaN	NaN	2.345	NaN	0.2284	NaN
HSA-MIR-33A*	30.2209	29.0508	30.059	28.996	29.1677	28.7924	27.9158	30.6723	29.5225	28.6571	28.357	29.401	29.0743	27.9933	-2.8762	-1.70615	-2.7143	-1.65126	-1.82302	-1.44769	-0.571124	-3.32762	-2.17785	-1.31244	-1.01231	-2.05634	-1.72959	-0.648634															0.6397	2.623	0.4439	1.83	1.871	0.7001	2.171
HSA-MIR-4304	30.2261	30.435	29.5237	32.5432	30.8276	30.7939	30.4063		30.5926				30.4492	31.245	1.26752	1.05865	1.96993	-1.04956	0.666044	0.699804	1.08731	0	0.901074	0	0	0	1.04448	0.248654	41.5373	48.0079	25.5265		63.0233	61.5656	47.0637		53.5488				48.4818	84.1681	1.963	NaN	0.5271	NaN	2.207	0.6822	1.19
HSA-MIR-107	30.2303	31.2966	28.3337		28.9341	26.7983	29.0658	27.7153		33.5195	30.6645	28.8597	26.6089	27.2792	30.2303	31.2966	28.3337	0	28.9341	26.7983	29.0658	27.7153	0	33.5195	30.6645	28.8597	26.6089	27.2792	7.93895e-08	3.79138e-08	2.9561e-07		1.94976e-07	8.56856e-07	1.77964e-07	4.53811e-07		8.12107e-09	5.8759e-08	2.05286e-07	9.77084e-07	6.13976e-07	0.6901	0.09792	2.662	0.4013	0.4284	0.8938	1.062
HSA-MIR-3907	30.2501	29.5135	28.427	30.9144	30.629	28.9124	28.7836	28.6045	30.2418	31.1276		29.4447	28.5838	30.7927	30.2501	29.5135	28.427	30.9144	30.629	28.9124	28.7836	28.6045	30.2418	31.1276	0	29.4447	28.5838	30.7927	7.83098e-08	1.30483e-07	2.77084e-07	4.94113e-08	6.02233e-08	1.97921e-07	2.16408e-07	2.45019e-07	7.87599e-08	4.26236e-08		1.36854e-07	2.4856e-07	5.37607e-08	0.9388	0.7088	0.934	NaN	2.033	0.3808	1.782
HSA-MIR-3924	30.258	29.3953	32.1534	30.4166	28.4255	32.2315		31.0868	30.9182	29.8229	29.6131	34.216		31.0022	-0.952748	-0.0900489	-2.84814	-1.11133	0.87976	-2.9263	0	-1.78155	-1.61295	-0.51763	-0.30789	-4.91075	0	-1.69695					54.3458										1.825	3.423	NaN	2.242	4.314	3.428	NaN
HSA-MIR-218-1*	30.2583	32.7326	30.5809		29.5349	29.8977	29.6664	29.1253	29.7572	33.5114	27.9878		30.3498	28.5876	-1.98865	-4.46288	-2.31119	0	-1.2652	-1.62799	-1.39667	-0.85564	-1.48755	-5.24169	0.28188	0	-2.08013	-0.31791											82.2518				1.318	0.1918	0.3877	4.996	0.3083	1.148	1.364
HSA-MIR-206	30.2681	30.7964	30.3281	30.6722	33.0642	32.6036	32.1994	32.858	30.5184	30.5957	31.0418	31.496	32.3222	31.0369	-1.5277	-2.05596	-1.58762	-1.93177	-4.32376	-3.86315	-3.45899	-4.11757	-1.77799	-1.85529	-2.30133	-2.75561	-3.58178	-2.29648															3.007	3.324	0.227	1.382	2.71	0.2283	0.5415
HSA-MIR-521	30.2803	29.6402	30.346					31.9158		30.2016		30.0227	32.345	33.064	30.2803	29.6402	30.346	0	0	0	0	31.9158	0	30.2016	0	30.0227	32.345	33.064	7.6688e-08	1.19513e-07	7.3274e-08					2.46822e-08		8.09887e-08		9.1679e-08	1.83308e-08	1.11367e-08	2.184	3.2	0.1637	NaN	4.425	NaN	NaN
HSA-MIR-18B	30.2873	30.5282	30.8716		31.6313	31.3643	33.6458	32.9318		34.6272		30.785	32.0675	32.497	30.2873	30.5282	30.8716	0	31.6313	31.3643	33.6458	32.9318	0	34.6272	0	30.785	32.0675	32.497	7.63151e-08	6.4581e-08	5.09016e-08		3.00632e-08	3.61752e-08	7.44045e-09	1.22052e-08		3.76844e-09		5.40502e-08	2.2218e-08	1.6498e-08	4.761	0.3262	0.4345	NaN	5.237	0.9892	0.3188
HSA-MIR-3157	30.2965	31.3389	33.2913	31.1444	32.0168		30.4084			33.8073		32.6833			30.2965	31.3389	33.2913	31.1444	32.0168	0	30.4084	0	0	33.8073	0	32.6833	0	0	7.58318e-08	3.68167e-08	9.51332e-09	4.21318e-08	2.30135e-08		7.01732e-08			6.65256e-09		1.44988e-08			3.353	0.408	NaN	NaN	2.116	0.5366	2.131
HSA-MIR-1253	30.3003	0				32.4477	32.6531							31.0056	30.3003	0	0	0	0	32.4477	32.6531	0	0	0	0	0	0	31.0056	7.56289e-08					1.7071e-08	1.48063e-08							4.6387e-08	4.248	NaN	NaN	NaN	NaN	NaN	0.5712
HSA-MIR-505	30.3007	29.9822	29.8591	30.1181	31.046	27.9509	30.4612	30.5988	31.6865	31.9715	28.9785	30.336	31.9874	29.0384	30.3007	29.9822	29.8591	30.1181	31.046	27.9509	30.4612	30.5988	31.6865	31.9715	28.9785	30.336	31.9874	29.0384	7.56111e-08	9.42862e-08	1.0269e-07	8.58133e-08	4.51064e-08	3.8542e-07	6.76472e-08	6.14942e-08	2.89339e-08	2.37484e-08	1.89061e-07	7.37852e-08	2.3487e-08	1.81372e-07	1.366	0.595	0.133	2.683	2.214	0.4297	0.8392
HSA-MIR-146B-3P	30.3036	29.9016		30.2156	28.7639	29.5995	31.1464	32.2772	29.3719		29.1407	33.8496	30.0775	30.6853	-1.28227	-0.880271	0	-1.19424	0.257439	-0.578231	-2.12509	-3.25592	-0.350621	0	-0.119361	-4.82824	-1.05623	-1.66402					83.6572										1.58	NaN	0.5792	2.78	2.714	2.423	0.605
HSA-MIR-181C	30.329	31.3222	29.3173	31.5973	29.109	28.5475	30.8027	28.8049	30.8803	30.8747	29.7375	30.1848	27.6089	29.0202	0.705114	-0.288055	1.7169	-0.563121	1.9252	2.48669	0.231409	2.22924	0.153869	0.159429	1.29665	0.849359	3.42527	2.01392	61.3394		30.4202		26.3304	17.8415	85.1803	21.3271	89.8837	89.538	40.7071	55.5031	9.30875	24.76	0.9862	0.9372	2.037	1.168	0.644	1.212	0.4878
HSA-MIR-518F*	30.3483	34.6038		30.8406	29.4884	30.299	30.0326	30.5618	30.1099	32.3762	30.5467	30.8224		31.7279	0.324253	-3.93124	0	-0.16799	1.18418	0.37365	0.64	0.11081	0.56272	-1.70359	0.12591	-0.1498	0	-1.05528	79.8712				44.0075	77.1827	64.1713	92.6068	67.7025		91.6426				1.961	0.6671	NaN	1.343	0.1335	1.877	1.676
HSA-MIR-24-2*	30.3533	31.0705		30.6153	29.9626	32.0985	31.8015	29.5211		30.6426	34.1275	30.6823	31.6746	32.182	-0.963715	-1.68092	0	-1.2257	-0.57303	-2.70892	-2.41194	-0.13156	0	-1.25307	-4.7379	-1.2927	-2.28499	-2.79248															2.657	3.016	0.3333	0.1526	2.101	1.837	0.6687
HSA-MIR-200C	30.3582	29.7913	32.4745		31.8453	29.9256	30.7583	30.8665	31.5173	31.9295	33.8677	29.464	29.451		30.3582	29.7913	32.4745	0	31.8453	29.9256	30.7583	30.8665	31.5173	31.9295	33.8677	29.464	29.451	0	7.26543e-08	1.07627e-07	1.67571e-08		2.59178e-08	9.80611e-08	5.50583e-08	5.10808e-08	3.25341e-08	2.44484e-08	6.37975e-09	1.35035e-07	1.3626e-07		2.181	1.018	1.282	0.1505	4.199	0.4103	1.135
HSA-MIR-4266	30.3738	32.3382	32.7477	31.0282	31.0113	30.2231	33.2521	33.2004	31.4972	31.1988	28.6737	29.8616	31.2744	31.0411	2.21094	0.246517	-0.162945	1.55657	1.57342	2.36162	-0.667305	-0.615625	1.0876	1.38597	3.91107	2.72312	1.31036	1.54364	21.5994	84.2929		33.9957	33.601	19.4572			47.0542	38.2631	6.64736	15.1446	40.3219	34.3018	2.521	1.974	0.4233	6.437	0.8397	0.8547	0.2355
HSA-LET-7G*	30.4023	0		32.5321	28.9443	28.0866				33.0946	30.1309	33.7851	28.3952	29.7855	-1.8797	0	0	-4.0095	-0.421658	0.435982	0	0	0	-4.57198	-1.60826	-5.26249	0.127372	-1.26286						73.9191							91.5498		1.703	0.3654	2.145	1.615	NaN	2.467	NaN
HSA-MIR-660	30.4336	28.5676	28.3156	29.1924	27.0778	26.7621	27.1033	27.6684	30.0521	31.0169	28.8488	26.9318	26.3865	29.2204	1.07055	2.93657	3.18859	2.31179	4.4264	4.7421	4.40086	3.83573	1.4521	0.487294	2.65532	4.57234	5.11768	2.28376	47.6139	13.0618	10.9683	20.141	4.65071	3.73667	4.73378	7.00373	36.5488	71.3362	15.8733	4.20327	2.88021	20.5361	0.3314	0.3069	1.718	0.7812	1.57	1.79	2.29
HSA-LET-7I*	30.4487	34.0493	31.7717	31.5194	30.7524	29.891	30.1444	30.8328	29.1822	30.6869	30.9014	30.3909	30.8638	30.4197	-1.60094	-5.20151	-2.92393	-2.67165	-1.90462	-1.04325	-1.29662	-1.98505	-0.334462	-1.83914	-2.05364	-1.54314	-2.016	-1.57191															1.79	2.105	0.4209	1.028	0.1918	0.7649	1.518
HSA-MIR-3647-5P	30.4659	0	34.6585										32.8601		-0.459124	0	-4.65173	0	0	0	0	0	0	0	0	0	-2.85335	0															7.453	NaN	0.4444	NaN	NaN	NaN	NaN
HSA-MIR-3942	30.4783	31.4093		31.7118	30.8512	31.02	31.1306	30.966	31.5212	30.6301	32.6031		30.7931	29.4547	-0.310192	-1.2412	0	-1.54376	-0.683114	-0.851914	-0.962564	-0.797904	-1.35313	-0.462004	-2.43498	0	-0.624994	0.713326														60.9912	2.012	2.513	0.5071	0.3625	1.372	0.8195	0.8793
HSA-MIR-3119	30.4786	33.4897				31.9011	32.6561				32.0468	31.4897		32.7431	30.4786	33.4897	0	0	0	31.9011	32.6561	0	0	0	32.0468	31.4897	0	32.7431	6.684e-08	8.29083e-09				2.49352e-08	1.47756e-08				2.25405e-08	3.31636e-08		1.39104e-08	4.437	NaN	NaN	1.176	0.7154	NaN	0.6737
HSA-MIR-548Z	30.4898	0	31.6686	34.5509	29.6588	32.9488		34.9851	34.6434			33.8752		32.0575	2.07372	0	0.8949	-1.98742	2.90473	-0.38527	0	-2.42154	-2.07985	0	0	-1.31172	0	0.50603	23.7547		53.7784		13.3533									70.4157	6.83	NaN	NaN	NaN	NaN	6.407	NaN
HSA-MIR-369-5P	30.4916	0		30.1236	32.3164		33.6457	31.9307	31.2215	31.0381	30.1126	31.5081	31.0292	32.6429	0.931538	0	0	1.29947	-0.893279	0	-2.22264	-0.507579	0.201651	0.384971	1.31052	-0.084939	0.393951	-1.21977	52.4299			40.6275					86.9555	76.5794	40.3175		76.1043		2.575	2.445	0.556	2.631	NaN	0.3833	0.1986
HSA-MIR-512-3P	30.5001	0			31.9867	32.4265	34.1633		32.7539	31.1541	33.7411		31.8107	31.847	30.5001	0	0	0	31.9867	32.4265	34.1633	0	32.7539	31.1541	33.7411	0	31.8107	31.847	6.5852e-08				2.34994e-08	1.73242e-08	5.19768e-09		1.38072e-08	4.18495e-08	6.96493e-09		2.65467e-08	2.58871e-08	4.974	4.385	0.6286	0.4134	NaN	0.9362	0.2697
HSA-MIR-466	30.5509	29.843	30.7615	30.1839	29.2886	32.1567		31.2409	31.0886	30.4853	30.7755	30.9385	30.9485		0.657473	1.36537	0.446828	1.02448	1.91974	-0.948312	0	-0.0325322	0.119818	0.723058	0.432888	0.269888	0.259898	0	63.3988	38.8135	73.3654	49.1588	26.4303				92.0304	60.5812	74.0778	82.9384	83.5147		1.454	2.11	0.3459	0.9776	3.086	1.839	NaN
HSA-MIR-636	30.5574	29.7506	33.1377		30.888										30.5574	29.7506	33.1377	0	30.888	0	0	0	0	0	0	0	0	0	6.32862e-08	1.10711e-07	1.05818e-08		5.03238e-08										1.706	NaN	NaN	NaN	3.879	0.7154	NaN
HSA-MIR-604	30.5628	30.8676												34.1713	30.5628	30.8676	0	0	0	0	0	0	0	0	0	0	0	34.1713	6.30481e-08	5.10421e-08												5.16894e-09	2.736	NaN	NaN	NaN	2.879	NaN	NaN
HSA-MIR-1307	30.5722	29.726	29.191	29.0219	30.4964	28.96	29.7452	30.2413		30.6455	32.112	29.2331	30.2643	29.1305	30.5722	29.726	29.191	29.0219	30.4964	28.96	29.7452	30.2413	0	30.6455	32.112	29.2331	30.2643	29.1305	6.26412e-08	1.12613e-07	1.63163e-07	1.83465e-07	6.60185e-08	1.91494e-07	1.11124e-07	7.8791e-08		5.95388e-08	2.15447e-08	1.58473e-07	7.75427e-08	1.70155e-07	0.9359	1.234	0.3631	0.2529	2.187	0.5202	1.14
HSA-MIR-3180-3P	30.5747	32.7605	30.712	29.6415	32.7315	31.5916	32.3887	30.7824	30.6163	33.4433	30.8499			31.3469	-2.45253	-4.63834	-2.58986	-1.51935	-4.60936	-3.46938	-4.26656	-2.6602	-2.49414	-5.32108	-2.7277	0	0	-3.22477															2.321	0.4409	NaN	1.507	0.6631	0.2745	0.4534
HSA-MIR-3614-5P	30.5819	0	31.2611			32.9531	33.4091								3.69099	0	3.01183	0	0	1.31984	0.86378	0	0	0	0	0	0	0	7.74287		12.3979			40.0579	54.9511								4.462	NaN	NaN	NaN	NaN	NaN	0.4318
HSA-MIR-3908	30.5887	0				33.3054	32.2		32.0869	34.6564	30.9272	31.3901		31.6052	-2.8891	0	0	0	0	-5.6058	-4.50046	0	-4.38735	-6.95686	-3.22762	-3.6905	0	-3.90568															3.631	0.3003	NaN	2.256	NaN	NaN	0.8162
HSA-MIR-525-5P	30.5946	30.3347	31.7437	30.543	32.5206	31.8667	30.8759	30.6729	32.2095	31.5143	31.5741		31.3113	31.3636	-2.04788	-1.788	-3.19703	-1.99634	-3.97395	-3.32002	-2.32927	-2.12625	-3.6628	-2.96761	-3.02745	0	-2.76462	-2.81696															2.237	1.641	0.4268	0.8916	3.482	0.3105	1.264
HSA-MIR-1224-3P	30.5975	28.5225	25.8028	31.7522	29.4796	31.9746		27.267	30.4745	26.2069	30.3238	26.2693	27.9702	30.8896	30.5975	28.5225	25.8028	31.7522	29.4796	31.9746	0	27.267	30.4745	26.2069	30.3238	26.2693	27.9702	30.8896	6.15497e-08	2.59346e-07	1.70838e-06	2.76454e-08	1.33581e-07	2.36966e-08		6.1916e-07	6.70274e-08	1.291e-06	7.44092e-08	1.23636e-06	3.80317e-07	5.02694e-08	0.4594	13.37	0.8897	0.4363	2.516	0.5258	NaN
HSA-MIR-99A*	30.5975	29.9331	30.6583	31.7933	31.181	32.6254		30.5523	30.5088	30.1994	29.4323	30.7718	31.1926	28.2585	-1.51127	-0.846834	-1.57198	-2.70699	-2.09475	-3.53909	0	-1.46604	-1.42248	-1.1131	-0.345977	-1.68556	-2.10636	0.827783														56.3394	1.347	2.462	0.2795	2.373	2.775	0.474	NaN
HSA-MIR-33A	30.613	30.8014	30.5683	32.2364	28.0216	30.2805	30.73	28.2142	31.6312		29.9207	31.1319	28.5333	29.4931	30.613	30.8014	30.5683	32.2364	28.0216	30.2805	30.73	28.2142	31.6312	0	29.9207	31.1319	28.5333	29.4931	6.08922e-08	5.34386e-08	6.28085e-08	1.97634e-08	3.66983e-07	7.66742e-08	5.61479e-08	3.21131e-07	3.00645e-08		9.83947e-08	4.24967e-08	2.57402e-07	1.32344e-07	1.047	NaN	1.388	1.33	1.195	3.329	0.6633
HSA-MIR-651	30.6208	33.5821	33.2011	31.93	32.5554	30.687	31.6449	33.4561		28.178	32.1806	32.588	32.5826	32.9444	30.6208	33.5821	33.2011	31.93	32.5554	30.687	31.6449	33.4561	0	28.178	32.1806	32.588	32.5826	32.9444	6.05633e-08	7.77623e-09	1.01272e-08	2.44403e-08	1.58436e-08	5.78474e-08	2.97804e-08	8.48597e-09		3.2928e-07	2.05436e-08	1.5489e-08	1.55479e-08	1.2099e-08	3.779	28.51	0.3041	1.007	0.6308	0.5214	1.276
HSA-MIR-623	30.6387	0	33.4321		33.6789			32.4587		34.928	33.3317	32.2549	33.4453	33.3027	30.6387	0	33.4321	0	33.6789	0	0	32.4587	0	34.928	33.3317	32.2549	33.4453	33.3027	5.98182e-08		8.62838e-09		7.27198e-09			1.69414e-08		3.05942e-09	9.25029e-09	1.95124e-08	8.55003e-09	9.43799e-09	7.888	0.5596	0.3534	0.9584	NaN	0.5057	NaN
HSA-MIR-143	30.6442	33.9924	30.3829	30.1282	26.8564	25.6079	29.3828	29.5343	30.2314	29.0661	26.8898	29.5707	28.469	26.4	30.6442	33.9924	30.3829	30.1282	26.8564	25.6079	29.3828	29.5343	30.2314	29.0661	26.8898	29.5707	28.469	26.4	5.9589e-08	5.85152e-09	7.14221e-08	8.52158e-08	8.23029e-07	1.95552e-06	1.42854e-07	1.28617e-07	7.93286e-08	1.77921e-07	8.04188e-07	1.25411e-07	2.69136e-07	1.12931e-06	0.4602	1.906	0.6516	4.88	0.05874	3.352	0.7578
HSA-MIR-519A	30.6545	32.1852	32.9549		32.0023	29.3099	30.3533	32.7639		31.0256	31.1222	31.8593	32.1346	29.3498	30.6545	32.1852	32.9549	0	32.0023	29.3099	30.3533	32.7639	0	31.0256	31.1222	31.8593	32.1346	29.3498	5.9168e-08	2.04782e-08	1.20115e-08		2.3246e-08	1.50258e-07	7.29031e-08	1.37113e-08		4.57471e-08	4.27834e-08	2.56685e-08	2.12095e-08	1.46157e-07	2.364	2.536	0.2657	1.343	1.064	0.4899	2.001
HSA-MIR-151-5P	30.6647	28.983	30.5729	30.1009	30.5219	27.9514	29.9959	28.3424	30.0121	31.7218	30.426	31.606	28.1945	28.422	0.255126	1.93688	0.34697	0.81895	0.39795	2.96846	0.92399	2.57741	0.9077	-0.802	0.49382	-0.68619	2.72539	2.49787	83.7914	26.1181	78.6234	56.6854	75.8936	12.7763	52.7049	16.7541	53.3034		71.0142		15.1208	17.7038	0.7578	0.5052	1.316	0.7026	3.16	0.4413	0.8275
HSA-MIR-503	30.6657	30.3247	29.4913	30.5568	31.8011	27.5289	30.203	28.783	30.1365	29.6765	29.2789	29.8014	28.2853	29.5284	-1.76859	-1.42758	-0.594125	-1.65962	-2.90392	1.36825	-1.30591	0.114155	-1.23937	-0.779345	-0.381765	-0.904245	0.611825	-0.631275						38.7362		92.3923					65.4368		0.7047	1.941	1.15	1.448	1.16	0.1692	0.667
HSA-MIR-1298	30.6815	0			31.2049		32.6701	31.9388	31.366	34.341	30.2144	30.8598	32.4274	30.0246	-1.3673	0	0	0	-1.89062	0	-3.35583	-2.6246	-2.05181	-5.02676	-0.900126	-1.54554	-3.11317	-0.710376															2.54	0.2789	0.2374	2.759	NaN	0.9321	0.4396
HSA-MIR-153	30.6911	0	31.1793	31.4288	32.1215	32.6069		32.5741	33.184	32.0251	31.1083	32.3788	31.6428	31.3906	1.53721	0	1.049	0.799556	0.106846	-0.378604	0	-0.345824	-0.955734	0.203156	1.12005	-0.150504	0.585516	0.837666	34.4551		48.3304	57.4526	92.8616					86.8648	46.0079		66.6411	55.9548	3.187	1.753	0.5164	1.875	NaN	0.6235	NaN
HSA-MIR-218	30.6987	31.2748	30.3024	29.8665	28.576	26.9562	30.3894	30.7461	31.0066	31.5984	28.88	31.3952	29.9296	29.0475	-1.24828	-1.82435	-0.851962	-0.415992	0.874448	2.49428	-0.938962	-1.29567	-1.55609	-2.14792	0.570488	-1.94471	-0.479102	0.402958					54.5462	17.7479					67.3389			75.6306	0.8651	0.6433	0.4622	2.398	0.7543	1.987	0.7363
HSA-MIR-4300	30.7045	33.11	30.9612	30.8938	29.1471	27.3378	30.1279	30.2804	31.6868	32.9749	28.9294	30.6282	29.3544	28.8927	30.7045	33.11	30.9612	30.8938	29.1471	27.3378	30.1279	30.2804	31.6868	32.9749	28.9294	30.6282	29.3544	28.8927	5.71499e-08	1.07869e-08	4.78355e-08	5.01233e-08	1.68205e-07	5.89513e-07	8.523e-08	7.66806e-08	2.89291e-08	1.18461e-08	1.95601e-07	6.02571e-08	1.45694e-07	2.00642e-07	1.069	0.3075	0.8546	2.876	0.2624	1.66	1.095
HSA-MIR-496	30.7177	30.6926	30.3	31.1168	30.3271	28.9119	30.9006	29.461	31.2991	30.7108	29.0384	31.9581	31.0458	30.2877	-1.64268	-1.61763	-1.22496	-2.04177	-1.25213	0.163087	-1.82561	-0.385973	-2.22413	-1.63583	0.0366369	-2.88308	-1.97076	-1.21269						89.3112					97.4925				1.155	1.61	0.2884	2.906	1.528	0.7985	0.6988
HSA-MIR-486-3P	30.7865	29.3141	29.8741	29.4364	31.2197	29.841	31.4053	32.268	29.9963	30.5713	30.7141	28.8076	28.8593		30.7865	29.3141	29.8741	29.4364	31.2197	29.841	31.4053	32.268	29.9963	30.5713	30.7141	28.8076	28.8593	0	5.39916e-08	1.4982e-07	1.01626e-07	1.37641e-07	3.99884e-08	1.03983e-07	3.51609e-08	1.93364e-08	9.33695e-08	6.26794e-08	5.67732e-08	2.12833e-07	2.05343e-07		0.9102	1.466	1.085	0.7521	3.283	0.3555	0.4071
HSA-MIR-188-5P	30.7896	34.7308	30.8419	30.3983	29.9726	30.24	31.2526	33.8159				30.325	30.2961	30.3632	-0.918434	-4.85964	-0.970811	-0.527151	-0.101491	-0.368871	-1.38148	-3.94481	0	0	0	-0.453891	-0.424951	-0.492071															2.041	NaN	0.9007	NaN	0.1727	1.896	1.017
HSA-MIR-922	30.8357	0		34.4559	34.1276					32.3505	31.2985				-1.57673	0	0	-5.19691	-4.86859	0	0	0	0	-3.09153	-2.03949	0	0	0															3.736	1.814	NaN	2.13	NaN	0.2012	NaN
HSA-MIR-3115	30.8367	0	31.7692			29.9518	32.166	31.9344		31.3479		32.3461			30.8367	0	31.7692	0	0	29.9518	32.166	31.9344	0	31.3479	0	32.3461	0	0	5.21453e-08		2.73229e-08			9.62977e-08	2.07526e-08	2.43654e-08		3.65875e-08		1.83167e-08			2.24	2.18	NaN	NaN	NaN	NaN	0.6122
HSA-MIR-590-5P	30.8397	29.865	32.5899	32.4172	29.2446	30.4173	30.3544	30.6212	32.5016	31.7716	31.1908	30.1246	28.6964	31.9487	30.8397	29.865	32.5899	32.4172	29.2446	30.4173	30.3544	30.6212	32.5016	31.7716	31.1908	30.1246	28.6964	31.9487	5.20389e-08	1.02265e-07	1.54691e-08	1.74365e-08	1.57217e-07	6.97402e-08	7.28471e-08	6.05481e-08	1.64456e-08	2.72765e-08	4.07978e-08	8.54281e-08	2.29887e-07	2.41259e-08	1.415	1.029	1.96	0.8719	3.615	2.255	1.361
HSA-MIR-2117	30.8571	0	32.3289				33.4094	30.2491	31.2549	33.6467	29.9194	31.6793	31.0868	32.6584	-1.88665	0	-3.3585	0	0	0	-4.43899	-1.2787	-2.28448	-4.67632	-0.948983	-2.7089	-2.11638	-3.68796															2.389	0.4793	0.6387	3.596	NaN	NaN	0.2797
HSA-MIR-659	30.86	31.999	31.872	30.1014		31.4913	34.4027		30.8504				30.9676	31.9546	1.15568	0.0167542	0.14371	1.91436	0	0.52441	-2.387	0	1.16537	0	0	0	1.04815	0.06118	44.8853	98.8454	90.5188	26.529		69.5243			44.585				48.3588	95.848	2.294	NaN	0.6675	NaN	1.354	NaN	0.1352
HSA-MIR-4288	30.8673	31.9375	29.7693	34.4886	31.3161	30.496	31.6932	30.3303		30.9788	31.7702		30.3787	29.9675	30.8673	31.9375	29.7693	34.4886	31.3161	30.496	31.6932	30.3303	0	30.9788	31.7702	0	30.3787	29.9675	5.10542e-08	2.43142e-08	1.09278e-07	4.14841e-09	3.74029e-08	6.60377e-08	2.88008e-08	7.40721e-08		4.72571e-08	2.73038e-08		7.16303e-08	9.52547e-08	1.778	2.283	0.7819	0.7471	1.101	0.6869	0.6888
HSA-LET-7A-2*	30.8822	30.1284	29.6277	30.8881	28.6503	25.6811	30.8503	28.8996	32.0635	30.4598	27.9967	31.8442	28.6124	27.4618	30.8822	30.1284	29.6277	30.8881	28.6503	25.6811	30.8503	28.8996	32.0635	30.4598	27.9967	31.8442	28.6124	27.4618	5.05262e-08	8.52016e-08	1.20548e-07	5.03207e-08	2.37354e-07	1.8587e-06	5.16565e-08	1.99689e-07	2.22802e-08	6.77157e-08	3.7339e-07	2.59388e-08	2.43671e-07	5.40953e-07	0.6937	NaN	1.261	2.533	0.9823	0.6212	1.043
HSA-MIR-576-5P	30.8894	30.7808	29.9198	30.5557	30.5873	28.8951	30.67	30.6086	30.7773	30.3298	29.579	32.081	30.3076	33.037	-0.605066	-0.496447	0.364542	-0.271328	-0.302948	1.38928	-0.385578	-0.324258	-0.492908	-0.0453781	0.705422	-1.79661	-0.0231981	-2.75259			77.6715			38.1755					61.3263				1.146	2.344	0.5378	2.234	1.606	0.7453	0.9166
HSA-MIR-1269	30.8996	30.949	30.7567	30.6251	32.0238	30.6622	29.9277	30.9966	33.646	30.8565	32.394	29.9536	29.8293	34.1413	30.8996	30.949	30.7567	30.6251	32.0238	30.6622	29.9277	30.9966	33.646	30.8565	32.394	29.9536	29.8293	34.1413	4.99221e-08	4.82417e-08	5.51213e-08	6.0385e-08	2.29023e-08	5.88508e-08	9.79212e-08	4.66747e-08	7.43952e-09	5.14368e-08	1.77184e-08	9.61756e-08	1.04827e-07	5.27785e-09	1.808	2.585	1.19	0.5043	1.389	0.4375	2.436
HSA-MIR-33B	30.9065	30.4764	31.7416	29.5386	30.8991	29.93	30.1261	30.3068		32.601	30.3022	31.5889	30.8739	30.8271	-0.339483	0.0905609	-1.17467	1.02842	-0.332115	0.636945	0.440825	0.260195	0	-2.03399	0.264735	-1.02194	-0.306875	-0.260175		93.9158		49.0245		64.3073	73.6713	83.4975			83.2352				1.319	0.5652	0.4229	1.575	2.31	0.6991	1.556
HSA-MIR-181D	30.9074	30.0568	31.1128	30.7914	30.6838	28.5057	31.5248	30.3455	30.4613	31.5548	30.0097	30.5768		30.5461	30.9074	30.0568	31.1128	30.7914	30.6838	28.5057	31.5248	30.3455	30.4613	31.5548	30.0097	30.5768	0	30.5461	4.96517e-08	8.95377e-08	4.30649e-08	5.38121e-08	5.7975e-08	2.62375e-07	3.23669e-08	7.32968e-08	6.7643e-08	3.16997e-08	9.25088e-08	6.24413e-08		6.37834e-08	0.9892	0.8761	NaN	1.448	2.319	0.6091	0.4429
HSA-MIR-1251	30.9095	30.9498		31.3308		30.4201	30.6305		31.7078	30.5912	30.2834	30.9971		30.0439	3.11207	3.07181	0	2.69085	0	3.60147	3.39112	0	2.31377	3.43039	3.7382	3.02447	0	3.97768	11.5658	11.8931		15.4873		8.23855	9.53174		20.1135	9.27579	7.4936	12.2898		6.34746	1.054	1.823	NaN	1.278	1.332	NaN	0.8785
HSA-MIR-1288	30.9276	31.6235	29.6927	32.2629	28.4671	30.2227	29.5766		34.8273	29.3918	29.3372	30.2513	29.2229	28.1584	0.521484	-0.174439	1.7564	-0.813851	2.98199	1.22636	1.87245	0	-3.3782	2.05727	2.11183	1.19779	2.22619	3.29061	69.6655		29.5986		12.657	42.7395	27.311			24.0271	23.1354	43.5943	21.3723	10.2195	0.8616	3.466	0.8804	2.039	0.6914	2.501	1.509
HSA-MIR-488*	30.9289	0	30.9465					31.8064		33.6041	31.346	31.6512		32.7859	30.9289	0	30.9465	0	0	0	0	31.8064	0	33.6041	31.346	31.6512	0	32.7859	4.89172e-08		4.83244e-08					2.66274e-08		7.65859e-09	3.66367e-08	2.9652e-08		1.35035e-08	2.454	0.5329	NaN	1.444	NaN	NaN	NaN
HSA-MIR-629	30.9431	30.9683	30.371	31.6569	32.1707	30.3884	31.322	29.7033	30.9513	33.5512	30.7016	29.3618	29.5321	31.1435	30.9431	30.9683	30.371	31.6569	32.1707	30.3884	31.322	29.7033	30.9513	33.5512	30.7016	29.3618	29.5321	31.1435	4.84378e-08	4.75994e-08	7.20122e-08	2.95347e-08	2.06842e-08	7.11523e-08	3.72508e-08	1.144e-07	4.81635e-08	7.94501e-09	5.72653e-08	1.44946e-07	1.28808e-07	4.21567e-08	1.329	0.3025	1.108	1.235	1.698	0.2994	0.7022
HSA-MIR-500B	30.954	32.8959	31.0906		33.4038	29.3245	30.5728	29.7504			29.6405		28.2122		30.954	32.8959	31.0906	0	33.4038	29.3245	30.5728	29.7504	0	0	29.6405	0	28.2122	0	4.8075e-08	1.25129e-08	4.37305e-08		8.79918e-09	1.48747e-07	6.26138e-08	1.10726e-07			1.19484e-07		3.21572e-07		1.306	NaN	2.738	2.55	0.4418	0.126	1.168
HSA-MIR-376A*	30.9577	32.0834	31.8988	29.6206	30.9639	29.5907	30.6389	30.9037	31.0414	30.2498	29.6123		29.9458	33.6292	-2.12979	-3.25548	-3.07086	-0.792615	-2.1359	-0.762725	-1.81095	-2.07576	-2.21346	-1.42186	-0.784385	0	-1.11787	-4.80124															1.264	2.864	0.799	2.524	0.753	0.6638	1.083
HSA-MIR-4255	30.979	28.8139	30.0132			34.0226		30.2264	30.3009						0.84545	3.01051	1.81126	0	0	-2.1982	0	1.59802	1.52359	0	0	0	0	0	55.6537	12.4093	28.4942					33.033	34.7819						1.064	NaN	NaN	NaN	6.201	NaN	NaN
HSA-MIR-3134	31.0128	32.8852		32.1644	32.0267		32.0704	33.2504					32.1191		-0.362385	-2.23482	0	-1.51396	-1.37627	0	-1.41995	-2.59998	0	0	0	0	-1.46864	0															3.251	NaN	0.4733	NaN	1.154	0.849	1.073
HSA-MIR-1301	31.0138	31.9582			29.6168	31.8699	31.7598	32.0576	29.9698	29.3788			32.5562	30.1436	-1.2739	-2.21828	0	0	0.12315	-2.12996	-2.01991	-2.31764	-0.22992	0.36113	0	0	-2.8163	-0.40365					91.8181					77.8555					1.443	6.219	0.1553	NaN	0.9749	2.005	0.5911
HSA-MIR-431*	31.0194	0	30.8611			34.2742	32.1147	30.2241	33.0476	31.0395			33.2788		31.0194	0	30.8611	0	0	34.2742	32.1147	30.2241	33.0476	31.0395	0	0	33.2788	0	4.59451e-08		5.12731e-08			4.81311e-09	2.15041e-08	7.97316e-08	1.12633e-08	4.53085e-08			9.59604e-09		2.799	3.829	0.1832	NaN	NaN	NaN	0.8997
HSA-MIR-3198	31.0247	0		31.0617	31.131	32.6405	34.1539	32.602	34.682	33.8826			31.4155	31.0139	31.0247	0	0	31.0617	31.131	32.6405	34.1539	32.602	34.682	33.8826	0	0	31.4155	31.0139	4.57768e-08			4.46172e-08	4.25241e-08	1.49355e-08	5.23191e-09	1.53399e-08	3.62804e-09	6.31402e-09			3.49127e-08	4.61209e-08	3.647	0.6978	0.8719	NaN	NaN	1.787	0.2863
HSA-MIR-2355-5P	31.0248	0			33.3398	29.7083	31.5373	31.2763					34.6157		-0.528372	0	0	0	-2.84329	0.788202	-1.04087	-0.779878	0	0	0	0	-4.11926	0						57.9065									3.629	NaN	0.0944	NaN	NaN	0.3846	1.747
HSA-MIR-99A	31.0269	31.9838	26.0494	30.9219	28.5701	28.7056	29.0903	29.2849	29.5817	31.9519	30.0627	29.8748	28.3468	28.4125	31.0269	31.9838	26.0494	30.9219	28.5701	28.7056	29.0903	29.2849	29.5817	31.9519	30.0627	29.8748	28.3468	28.4125	4.57061e-08	2.35464e-08	1.44001e-06	4.91578e-08	2.50921e-07	2.28424e-07	1.74959e-07	1.5289e-07	1.24459e-07	2.40721e-08	8.91739e-08	1.01578e-07	2.92923e-07	2.79896e-07	0.492	0.3595	0.9885	0.7543	0.3295	1.425	1.294
HSA-MIR-4320	31.0328	30.9503	33.2698		32.367	29.6866				32.0623	30.7782	34.1436	31.0021	31.7072	31.0328	30.9503	33.2698	0	32.367	29.6866	0	0	0	32.0623	30.7782	34.1436	31.0021	31.7072	4.55194e-08	4.81999e-08	9.65562e-09		1.80534e-08	1.15732e-07				2.22986e-08	5.43045e-08	5.26929e-09	4.64978e-08	2.85215e-08	2.342	1.592	0.75	2.196	3.224	0.49	NaN
HSA-MIR-9*	31.0377	0		31.9547	32.3367	31.1318	33.7271				32.3233		33.078	32.06	31.0377	0	0	31.9547	32.3367	31.1318	33.7271	0	0	0	32.3233	0	33.078	32.06	4.53637e-08			2.40256e-08	1.84372e-08	4.24999e-08	7.03285e-09				1.86081e-08		1.10285e-08	2.23343e-08	3.75	NaN	0.2858	1.209	NaN	0.8037	0.3993
HSA-MIR-769-3P	31.0395	31.5526	31.248			31.5284				30.8514	33.3729	29.9954	29.8109	30.9356	31.0395	31.5526	31.248	0	0	31.5284	0	0	0	30.8514	33.3729	29.9954	29.8109	30.9356	4.53099e-08	3.17478e-08	3.92116e-08			3.22845e-08				5.16168e-08	8.99005e-09	9.3431e-08	1.06174e-07	4.86902e-08	1.547	2.445	1.136	0.2412	1.409	NaN	NaN
HSA-MIR-641	31.0567	0	30.9669		31.4144	28.5721				28.796		31.6248	32.4808		2.11232	0	2.20217	0	1.75465	4.59693	0	0	0	4.37302	0	1.5442	0.688283	0	23.1275		21.731		29.6344	4.13224				4.82602		34.2885	62.0592		1.26	8.374	0.1472	NaN	NaN	0.5185	NaN
HSA-MIR-520D-5P	31.0636	30.3035	30.6176		34.0769	30.0897	30.1135	34.513	32.4873	33.7882	30.3564	33.0031		29.6439	1.90858	2.66866	2.35463	0	-1.10474	2.88246	2.85867	-1.5408	0.484912	-0.815998	2.61576	-0.0309377	0	3.32827	26.6355	15.7272	19.5517			13.561	13.7865		71.4541		16.3146			9.95612	1.999	0.4195	NaN	2.564	4.4	0.1306	2.652
HSA-MIR-22*	31.0662	31.6864	30.5784	29.8667	28.8047	28.7003	28.4459	28.2772	29.362	31.4142	29.6977	29.4779	28.1128	30.8926	31.0662	31.6864	30.5784	29.8667	28.8047	28.7003	28.4459	28.2772	29.362	31.4142	29.6977	29.4779	28.1128	30.8926	4.44773e-08	2.89354e-08	6.23721e-08	1.02147e-07	2.13266e-07	2.29271e-07	2.73489e-07	3.07414e-07	1.44925e-07	3.49454e-08	1.14842e-07	1.33737e-07	3.44509e-07	5.0165e-08	0.5424	0.5912	1.317	1.1	0.4587	1.372	2.291
HSA-MIR-375	31.0671	31.0254	28.8362	31.8806		32.0761	33.5885	31.9434	32.7951		30.7843	31.6567	30.7186		-2.20834	-2.16671	0.0225041	-3.02191	0	-3.21735	-4.72978	-3.08467	-3.93635	0	-1.92555	-2.79796	-1.85989	0			98.4522												1.825	NaN	0.7285	1.745	2.442	NaN	0.2184
HSA-MIR-103A-2*	31.0695	30.2164	30.7003		29.1271	28.4794	28.9602	29.8637	31.8287		30.4694	29.51	28.6626	30.8669	31.0695	30.2164	30.7003	0	29.1271	28.4794	28.9602	29.8637	31.8287	0	30.4694	29.51	28.6626	30.8669	4.43773e-08	8.01585e-08	5.73161e-08		1.70552e-07	2.67215e-07	1.91479e-07	1.0236e-07	2.62181e-08		6.72666e-08	1.30795e-07	2.35335e-07	5.10656e-08	0.6975	NaN	1.159	0.8307	1.638	1.414	2.067
HSA-MIR-518A-3P	31.0754	30.4167			32.5226	31.0133	33.4153			30.9394	31.5019	32.0162	32.4862	33.3299	31.0754	30.4167	0	0	32.5226	31.0133	33.4153	0	0	30.9394	31.5019	32.0162	32.4862	33.3299	4.41954e-08	6.9771e-08			1.62072e-08	4.61372e-08	8.72974e-09			4.85651e-08	3.28846e-08	2.30228e-08	1.66213e-08	9.26223e-09	2.581	3.935	0.3043	1.509	5.297	0.4992	0.3502
HSA-MIR-152	31.1005	32.515	33.884	30.3774	29.4164	28.0366	30.4907	28.8397	31.5333	30.9474	30.3829	30.0147	28.2865	29.983	31.1005	32.515	33.884	30.3774	29.4164	28.0366	30.4907	28.8397	31.5333	30.9474	30.3829	30.0147	28.2865	29.983	4.34328e-08	1.62929e-08	6.3082e-09	7.16939e-08	1.3957e-07	3.63195e-07	6.62799e-08	2.08151e-07	3.21761e-08	4.82959e-08	7.14241e-08	9.21907e-08	3.05428e-07	9.42349e-08	0.8447	1.303	1.862	1.091	0.4119	1.432	0.8853
HSA-MIR-302D*	31.1005	0		31.7018	30.7834	28.0669	28.1119	27.0652	32.9256	28.333	26.4437	29.6914	26.5934	25.645	-1.21365	0	0	-1.81485	-0.896522	1.81998	1.77499	2.82171	-3.03865	1.55388	3.4432	0.195468	3.29347	4.24195						28.3225	29.2197	14.1443		34.0593	9.19378	87.329	10.1992	5.28502	0.3041	2.872	2.167	6.027	NaN	0.1998	1.658
HSA-MIR-15B*	31.1119	30.4213	30.0285	28.2414	28.1958	26.653	28.0491	29.1328	28.3782	31.7685	28.7589	28.0406	27.4399	29.1202	31.1119	30.4213	30.0285	28.2414	28.1958	26.653	28.0491	29.1328	28.3782	31.7685	28.7589	28.0406	27.4399	29.1202	4.30896e-08	6.95456e-08	9.13111e-08	3.15123e-07	3.2526e-07	9.47623e-07	3.60056e-07	1.69881e-07	2.86623e-07	2.73358e-08	2.20137e-07	3.62199e-07	5.49239e-07	1.71378e-07	0.3042	0.2677	1.215	1.221	0.6382	1.211	1.746
HSA-MIR-99B	31.1316	30.9081	29.6495	34.7151	30.7868	29.2539	30.7436	29.2261	31.6931	30.2431		29.4525	31.1114		31.1316	30.9081	29.6495	34.7151	30.7868	29.2539	30.7436	29.2261	31.6931	30.2431	0	29.4525	31.1114	0	4.25076e-08	4.96299e-08	1.18747e-07	3.54587e-09	5.39836e-08	1.56205e-07	5.56234e-08	1.59243e-07	2.88012e-08	7.86879e-08		1.3612e-07	4.31073e-08		1.021	2.621	0.3245	NaN	1.549	0.6837	0.9174
HSA-MIR-3138	31.1473	0	30.7369								33.0052			31.4335	0.0839327	0	0.494313	0	0	0	0	0	0	0	-1.77397	0	0	-0.202207	94.3482		70.99												1.783	NaN	NaN	0.3864	NaN	NaN	NaN
HSA-LET-7D*	31.1595	28.5345	27.704	28.665	27.8414	26.5223	27.4523	28.7102	28.7726	33.2185	29.3355	28.3993	27.0747	27.85	-3.09464	-0.469631	0.360857	-0.600133	0.223437	1.54252	0.612567	-0.645323	-0.707703	-5.15367	-1.27067	-0.334433	0.990207	0.214897			77.8702		85.6522	34.3286	65.4032						50.3406	86.1608	0.2402	0.07998	1.278	0.6683	1.926	1.264	2.155
HSA-MIR-193A-3P	31.1672	0	32.4329		33.0414	32.7356		31.2514		33.454			31.8328		31.1672	0	32.4329	0	33.0414	32.7356	0	31.2514	0	33.454	0	0	31.8328	0	4.14702e-08		1.72478e-08		1.13125e-08	1.3983e-08		3.91196e-08		8.49856e-09			2.61447e-08		3.611	1.027	0.7136	NaN	NaN	0.5195	NaN
HSA-MIR-1244	31.1756	31.2009	29.0077	30.4146		30.1815			30.1998	30.4111	30.7744	31.944	30.5324	29.039	-0.375374	-0.400723	1.7925	0.385614	0	0.618744	0	0	0.600394	0.389074	0.0257638	-1.14377	0.267794	1.76123			28.8671	76.5453		65.1238			65.9574	76.362	98.23		83.0589	29.4996	0.7669	1.807	0.3754	0.7957	0.9794	NaN	NaN
HSA-MIR-3671	31.1823	30.847	31.203	30.1601	30.8034	30.3526	31.005	30.8654	32.3592	30.0281	31.9158	30.4076	29.4088	30.3384	-2.45955	-2.12425	-2.48029	-1.43735	-2.08067	-1.62985	-2.28225	-2.14267	-3.63644	-1.30533	-3.19309	-1.68486	-0.686095	-1.61565															1.026	3.167	1.099	0.4847	1.682	0.7035	0.7966
HSA-MIR-199B-5P	31.2263	32.2722	32.7776		31.8476	29.2481	33.4044	29.8651	32.3027	30.4145	30.5959	32.5318	30.292	30.0031	31.2263	32.2722	32.7776	0	31.8476	29.2481	33.4044	29.8651	32.3027	30.4145	30.5959	32.5318	30.292	30.0031	3.98071e-08	1.92795e-08	1.35817e-08		2.58765e-08	1.56839e-07	8.79583e-09	1.02261e-07	1.88768e-08	6.98738e-08	6.16184e-08	1.61044e-08	7.60696e-08	9.29317e-08	1.469	3.576	0.8798	1.786	0.9246	0.5035	0.2229
HSA-MIR-98	31.2466	31.6485	34.2632	30.621	31.5159	29.2616	30.8457	32.5398	30.771	30.8401	32.3316	32.6116	31.0786	32.1026	-1.99841	-2.40031	-5.01503	-1.3728	-2.26769	-0.0133986	-1.59753	-3.29159	-1.52278	-1.59188	-3.08341	-3.36341	-1.83045	-2.8544															1.675	3.079	0.5898	0.6203	1.648	0.7328	1.519
HSA-MIR-2355-3P	31.2583	30.51	32.3674	31.2522	29.549	27.6453	31.0986	30.6132	32.3864	31.7369	30.0128	30.9821	30.8758	28.318	-1.69913	-0.950825	-2.80829	-1.69303	0.0101226	1.91387	-1.53946	-1.05401	-2.82722	-2.17775	-0.453597	-1.42294	-1.31665	1.24117					99.3008	26.5379								42.3029	0.8697	0.8658	0.3554	1.62	1.899	1.5	0.6672
HSA-MIR-199A-5P	31.2631	31.0542	32.2941			29.4911	30.2482	28.8244		34.0476	30.228	29.9957	30.1931	29.2535	31.2631	31.0542	32.2941	0	0	29.4911	30.2482	28.8244	0	34.0476	30.228	29.9957	30.1931	29.2535	3.88038e-08	4.48488e-08	1.89898e-08			1.32522e-07	7.84113e-08	2.10379e-07		5.63189e-09	7.95196e-08	9.34096e-08	8.14662e-08	1.5625e-07	0.9456	0.1904	0.6223	1.523	1.421	NaN	1.312
HSA-MIR-1283	31.2675	32.81			31.584	30.4681	32.5363				30.8523		32.9617	31.848	31.2675	32.81	0	0	31.584	30.4681	32.5363	0	0	0	30.8523	0	32.9617	31.848	3.86857e-08	1.32801e-08			3.10652e-08	6.73259e-08	1.6054e-08				5.15878e-08		1.1955e-08	2.58693e-08	2.357	NaN	0.2283	2.47	1.052	0.9983	0.6718
HSA-MIR-582-5P	31.2702	0		30.5467	30.3767	30.6163	32.038	33.1506		31.1961	30.5324	34.8597	30.9227	28.7263	-1.54351	0	0	-0.820019	-0.649999	-0.889619	-2.31132	-3.42386	0	-1.46935	-0.805669	-5.13304	-1.19597	1.00045														49.9844	1.561	2.279	0.6225	2.045	NaN	1.529	0.6296
HSA-MIR-558	31.2872	0	33.1098							33.5653		30.2994			31.2872	0	33.1098	0	0	0	0	0	0	33.5653	0	30.2994	0	0	3.81593e-08		1.07887e-08							7.86758e-09		7.56799e-08			1.851	0.5295	NaN	NaN	NaN	NaN	NaN
HSA-MIR-626	31.3021	0	31.9646	32.4268	31.1557	32.8266	31.2805	31.7581	31.442	30.0348	30.7988	34.1528	31.2427	31.3387	-0.620726	0	-1.28325	-1.7455	-0.474342	-2.14531	-0.599192	-1.07675	-0.760632	0.646488	-0.117482	-3.47146	-0.561402	-0.657392										63.8834					1.833	6.12	0.5987	2.041	NaN	1.07	1.278
HSA-LET-7A*	31.3124	31.1887	29.7664	31.8888	30.5484	28.9788	30.1818	29.7292	31.3177		29.0957	29.6083	28.7764	31.1469	-0.97201	-0.848333	0.57396	-1.5484	-0.20801	1.36158	0.15863	0.61119	-0.97729	0	1.24469	0.73207	1.56397	-0.80647			67.177			38.9156	89.5875	65.4656			42.1999	60.2039	33.8219		0.5489	1.02	0.8298	3.187	1.203	1.36	0.3854
HSA-MIR-211	31.3328	31.4536	28.8644	29.86	30.0733	29.3343	30.5538	31.9093	29.7676	30.8046	28.2419	29.7419	31.6584	29.8263	0.598278	0.477503	3.06669	2.07112	1.85786	2.59678	1.37729	0.0217585	2.16347	1.12655	3.68923	2.18925	0.272669	2.1048	66.0542	71.822	11.9353	23.7975	27.5885	16.5307	38.4942	98.5031	22.3219	45.801	7.75232	21.9266	82.7787	23.2484	0.6389	1.278	0.1598	4.278	0.7638	0.8068	0.753
HSA-MIR-96	31.3571	30.8559	32.282	31.1416	29.1542	28.2673	29.9347	29.2715	31.611	32.7693	32.296	30.6308	28.6969		31.3571	30.8559	32.282	31.1416	29.1542	28.2673	29.9347	29.2715	31.611	32.7693	32.296	30.6308	28.6969	0	3.63565e-08	5.14559e-08	1.91497e-08	4.22122e-08	1.67385e-07	3.09526e-07	9.74465e-08	1.54314e-07	3.04884e-08	1.36598e-08	1.8964e-08	6.01453e-08	2.2982e-07		0.8077	0.421	1.6	0.331	1.486	1.961	1.487
HSA-MIR-122*	31.3726	0	25.9884		34.527	30.1484					32.0067	30.8839			31.3726	0	25.9884	0	34.527	30.1484	0	0	0	0	32.0067	30.8839	0	0	3.59675e-08		1.50214e-06		4.03959e-09	8.40292e-08					2.3175e-08	5.04677e-08			1.079	NaN	NaN	0.5461	NaN	0.06389	NaN
HSA-MIR-181A	31.3751	33.2533	30.9026	30.4878	31.1139	30.0932	32.0346	30.7633	31.6709	31.7079	31.3262	31.5669	29.46	30.9142	31.3751	33.2533	30.9026	30.4878	31.1139	30.0932	32.0346	30.7633	31.6709	31.7079	31.3262	31.5669	29.46	30.9142	3.59043e-08	9.76689e-09	4.98188e-08	6.64119e-08	4.30323e-08	8.73054e-08	2.27307e-08	5.48686e-08	2.92485e-08	2.85075e-08	3.71422e-08	3.14361e-08	1.35412e-07	4.94192e-08	1.196	1.317	1.413	0.9718	0.4227	0.7557	0.5198
HSA-MIR-943	31.3856	30.5936	31.5708	31.0294	32.1598	28.8327	30.8444	31.8391		30.8525		31.3225	32.9261	33.8697	31.3856	30.5936	31.5708	31.0294	32.1598	28.8327	30.8444	31.8391	0	30.8525	0	31.3225	32.9261	33.8697	3.56444e-08	6.17186e-08	3.13512e-08	4.5628e-08	2.08411e-08	2.09174e-07	5.18697e-08	2.60294e-08		5.15803e-08		3.72368e-08	1.22535e-08	6.371e-09	1.508	3.026	0.1625	NaN	3.393	0.4649	1.507
HSA-MIR-511	31.3875	0	34.2527			34.2207		32.8148		32.302	31.0192		33.0069		31.3875	0	34.2527	0	0	34.2207	0	32.8148	0	32.302	31.0192	0	33.0069	0	3.55973e-08		4.88561e-09			4.99502e-09		1.32359e-08		1.88857e-08	4.59496e-08		1.15861e-08		3.976	2.926	0.4056	4.032	NaN	NaN	NaN
HSA-MIR-4268	31.3884	0	32.1159	30.172					30.9562	31.0798				32.3651	-0.933691	0	-1.66121	0.28265	0	0	0	0	-0.50155	-0.62515	0	0	0	-1.9104				82.208											0.964	1.656	NaN	NaN	NaN	NaN	NaN
HSA-MIR-625*	31.3889	30.106	29.1053	29.8006	29.3504	29.762		30.7414	34.522	30.7266	29.8213	29.6215	30.2205	31.148	-2.35842	-1.07557	-0.074842	-0.770152	-0.319922	-0.731512	0	-1.71095	-5.49156	-1.69616	-0.790792	-0.591072	-1.19008	-2.11751															0.7226	1.586	0.5091	1.683	2.285	1.566	NaN
HSA-MIR-302B	31.4009	33.8903	32.7724				34.2111			32.8128					31.4009	33.8903	32.7724	0	0	0	34.2111	0	0	32.8128	0	0	0	0	3.52682e-08	6.28076e-09	1.36313e-08				5.02854e-09			1.32548e-08					3.12	1.627	NaN	NaN	0.7222	NaN	0.3055
HSA-MIR-634	31.4015	28.8789	28.6158	29.8733	33.4076	31.7569	32.5246			31.2676			31.7725	30.2539	31.4015	28.8789	28.6158	29.8733	33.4076	31.7569	32.5246	0	0	31.2676	0	0	31.7725	30.2539	3.52547e-08	2.02568e-07	2.43094e-07	1.01679e-07	8.77597e-09	2.75553e-08	1.61852e-08			3.8683e-08			2.72599e-08	7.81005e-08	1.063	1.618	0.2576	NaN	7.938	0.1395	0.3351
HSA-MIR-34A	31.4028	32.6131	30.5749	33.2403	29.0167	32.2369	30.8802	30.6608		33.9458	32.6023	31.1411		31.2961	31.4028	32.6131	30.5749	33.2403	29.0167	32.2369	30.8802	30.6608	0	33.9458	32.6023	31.1411	0	31.2961	3.52219e-08	1.5222e-08	6.25219e-08	9.85557e-09	1.84118e-07	1.9757e-08	5.05977e-08	5.89095e-08		6.0436e-09	1.5337e-08	4.22277e-08		3.79266e-08	1.584	0.377	NaN	0.5419	0.8897	4.366	1.563
HSA-MIR-522	31.4103	0					34.8357								31.4103	0	0	0	0	0	34.8357	0	0	0	0	0	0	0	3.50391e-08						3.26133e-09								3.955	NaN	NaN	NaN	NaN	NaN	0.2528
HSA-MIR-3666	31.4227	33.5301		30.5247				32.4066		32.6227	33.6945	34.3666	32.225	30.4891	31.4227	33.5301	0	30.5247	0	0	0	32.4066	0	32.6227	33.6945	34.3666	32.225	30.4891	3.47394e-08	8.06162e-09		6.47366e-08				1.75653e-08		1.51218e-08	7.19378e-09	4.5147e-09	1.99213e-08	6.6352e-08	2.454	1.482	0.4411	0.3993	0.7403	NaN	NaN
HSA-MIR-191*	31.424	30.1392	31.34	31.8934	29.9221	30.0478	33.3546	30.28	31.5458	31.9163	30.9993	30.996	30.9932	30.4014	-2.10052	-0.815738	-2.01647	-2.56993	-0.59863	-0.72429	-4.03105	-0.95648	-2.22232	-2.59284	-1.67582	-1.67247	-1.66973	-1.07794															1.077	1.062	0.4552	1.136	3.412	1.609	0.1941
HSA-MIR-924	31.4279	32.1692	30.2985		31.1937	30.9084	31.5969		31.8573		31.6771	30.8196	33.4881	31.9535	31.4279	32.1692	30.2985	0	31.1937	30.9084	31.5969	0	31.8573	0	31.6771	30.8196	33.4881	31.9535	3.46142e-08	2.07061e-08	7.5724e-08		4.07147e-08	4.96176e-08	3.07885e-08		2.57047e-08		2.91245e-08	5.27701e-08	8.30004e-09	2.40451e-08	1.618	NaN	0.1216	1.07	1.258	1.004	0.9886
HSA-MIR-335	31.4326	31.9171	31.2608	31.596	29.5459	28.8038	30.7691	29.7663	31.209	31.8645	30.7853	31.0939	29.491	30.8203	31.4326	31.9171	31.2608	31.596	29.5459	28.8038	30.7691	29.7663	31.209	31.8645	30.7853	31.0939	29.491	30.8203	3.45028e-08	2.46607e-08	3.88653e-08	3.08083e-08	1.27585e-07	2.13396e-07	5.46504e-08	1.0951e-07	4.02855e-08	2.55758e-08	5.40397e-08	4.36315e-08	1.32534e-07	5.27445e-08	0.8404	0.8642	1.012	1.034	0.7808	1.639	0.9143
HSA-MIR-661	31.4522	30.0716	28.8499			29.8821		30.5229	32.9154	27.6275	30.6969	30.8669	29.9631	29.0482	-0.884495	0.496082	1.71784	0	0	0.685557	0	0.0448171	-2.34767	2.94018	-0.129143	-0.299153	0.604617	1.51952		70.903	30.4004			62.1766		96.9413		13.0292			65.7646	34.8803	0.561	11.03	0.4936	0.7441	1.899	NaN	NaN
HSA-MIR-671-5P	31.4533	0	33.2431		32.9984	30.5032	32.2572	31.2134		32.1419	30.7916	30.9791		31.3908	31.4533	0	33.2431	0	32.9984	30.5032	32.2572	31.2134	0	32.1419	30.7916	30.9791	0	31.3908	3.4011e-08		9.83598e-09		1.16543e-08	6.57076e-08	1.94816e-08	4.01639e-08		2.11017e-08	5.38039e-08	4.72466e-08		3.55175e-08	1.763	1.517	NaN	2.191	NaN	0.3186	0.6936
HSA-MIR-939	31.4573	0		30.606	31.3815	31.904	32.1183	32.4677		32.7497		31.9733		33.621	1.96009	0	0	2.8114	2.03595	1.51345	1.29913	0.949703	0	0.667773	0	1.44413	0	-0.203557	25.7012			14.2457	24.3847	35.0272	40.637	51.7739		62.9478		36.7513			2.151	1.218	NaN	NaN	NaN	1.195	0.9342
HSA-MIR-190B	31.4598	32.6881			31.1638					31.9574	32.3849			30.6641	31.4598	32.6881	0	0	31.1638	0	0	0	0	31.9574	32.3849	0	0	30.6641	3.38567e-08	1.44515e-08			4.15694e-08					2.39807e-08	1.78315e-08			5.87725e-08	1.382	1.358	NaN	0.572	0.7668	0.895	NaN
HSA-MIR-1323	31.4854	30.3298	32.6478	30.498	32.4738	30.5759	30.7115		30.4595	33.0922	29.883	31.3406	32.8067	33.2721	0.167536	1.32313	-0.994883	1.15492	-0.820913	1.07704	0.941417	0	1.1934	-1.43927	1.76993	0.312297	-1.15378	-1.6192	89.0362	39.9668		44.9092		47.4001	52.0721		43.7272		29.3224	80.5359			1.346	0.6129	0.1688	3.211	3.897	0.3577	1.58
HSA-MIR-574-5P	31.4866	28.224	26.6718		29.6978		28.8517		28.3825				29.3534		-1.3623	1.90026	3.45249	0	0.426436	0	1.27255	0	1.74178	0	0	0	0.770846	0		26.7894	9.13478		74.4098		41.3929		29.9001				58.6074		0.2217	NaN	0.3049	NaN	2.766	0.404	0.9459
HSA-MIR-10B	31.4953	30.7194	29.3575	27.9745	30.9522	28.7761	30.9192	28.9392	30.846	33.2064	29.6928	30.7924	29.0872	29.5228	31.4953	30.7194	29.3575	27.9745	30.9522	28.7761	30.9192	28.9392	30.846	33.2064	29.6928	30.7924	29.0872	29.5228	3.30344e-08	5.65642e-08	1.4538e-07	3.79183e-07	4.81358e-08	2.17536e-07	4.92472e-08	1.94277e-07	5.18104e-08	1.00898e-08	1.15231e-07	5.3773e-08	1.75337e-07	1.29644e-07	0.5395	0.2286	0.8976	1.479	1.201	0.4146	0.5524
HSA-MIR-1297	31.4994	0	34.2803											31.7438	31.4994	0	34.2803	0	0	0	0	0	0	0	0	0	0	31.7438	3.29403e-08		4.793e-09											2.78076e-08	2.688	NaN	NaN	NaN	NaN	NaN	NaN
HSA-MIR-4328	31.5022	0			32.0263	30.6606				32.1301	32.0797			32.8009	31.5022	0	0	0	32.0263	30.6606	0	0	0	32.1301	32.0797	0	0	32.8009	3.28781e-08				2.28618e-08	5.89173e-08				2.12747e-08	2.20311e-08			1.33639e-08	1.907	1.711	NaN	1.004	NaN	0.6992	NaN
HSA-MIR-140-5P	31.512	30.8517	30.0883	31.0285	28.0149	26.5279	28.6828	29.9449	30.2208	29.8663	28.469	29.0306	28.2241	27.7642	31.512	30.8517	30.0883	31.0285	28.0149	26.5279	28.6828	29.9449	30.2208	29.8663	28.469	29.0306	28.2241	27.7642	3.26554e-08	5.16074e-08	8.76e-08	4.56546e-08	3.68699e-07	1.03351e-06	2.32066e-07	9.67593e-08	7.99175e-08	1.02173e-07	2.69139e-07	1.82352e-07	3.18937e-07	4.38687e-07	0.2936	1.274	0.8989	1.901	0.6031	1.748	1.433
HSA-MIR-3074	31.5497	32.0773			31.0648	30.5639	32.3355	33.869	30.5062	31.0482	32.3621	33.0815	31.092	30.8955	-0.338243	-0.865855	0	0	0.146675	0.647565	-1.12406	-2.65749	0.705275	0.163265	-1.15066	-1.87002	0.119495	0.315935					90.333	63.8357			61.3325	89.3002			92.051	80.333	1.568	3.079	0.675	0.7015	1.414	1.157	0.6246
HSA-MIR-584	31.5536	33.7567	32.6581	30.3342	32.0001	30.9647	30.2418	29.3805		34.3332	32.3599	31.7275	31.0029	32.1049	31.5536	33.7567	32.6581	30.3342	32.0001	30.9647	30.2418	29.3805	0	34.3332	32.3599	31.7275	31.0029	32.1049	3.17268e-08	6.88993e-09	1.47548e-08	7.38747e-08	2.32813e-08	4.77182e-08	7.87582e-08	1.43085e-07		4.62034e-09	1.8143e-08	2.81238e-08	4.64713e-08	2.16496e-08	1.623	0.3278	0.745	0.7291	0.458	0.628	2.766
HSA-MIR-3126-5P	31.5714	29.4778		30.5769	31.474	32.3494	31.1221	32.8893		29.965		32.4043	32.8304	30.7802	31.5714	29.4778	0	30.5769	31.474	32.3494	31.1221	32.8893	0	29.965	0	32.4043	32.8304	30.7802	3.13379e-08	1.33748e-07		6.24374e-08	3.35251e-08	1.82758e-08	4.27867e-08	1.25703e-08		9.54213e-08		1.75927e-08	1.30941e-08	5.42304e-08	1.306	5.514	0.171	NaN	7.243	0.7366	1.224
HSA-MIR-599	31.5906	30.8899	31.6832	31.943	32.6496	29.2825	31.4059	30.969	31.3104	31.9148	27.9326	32.1637	29.1786	27.0291	0.333632	1.03436	0.241022	-0.018798	-0.725368	2.64172	0.518352	0.955212	0.613872	0.009492	3.99165	-0.239438	2.7456	4.89516	79.3536	48.8234	84.6146			16.0237	69.8169	51.5766	65.3441	99.3442	6.28627		14.9105	3.36054	0.738	0.8178	1.231	7.32	1.559	0.1868	0.5761
HSA-MIR-1909	31.5926	31.2269		29.6153		29.4019	32.4862	31.457	31.3207		28.8585	31.0536		32.5821	31.5926	31.2269	0	29.6153	0	29.4019	32.4862	31.457	31.3207	0	28.8585	31.0536	0	32.5821	3.08812e-08	3.9788e-08		1.21595e-07		1.40977e-07	1.66215e-08	3.39239e-08	3.72857e-08		2.05458e-07	4.48675e-08		1.55525e-08	0.8294	NaN	NaN	4.336	1.389	NaN	0.3066
HSA-MIR-362-3P	31.5932	30.2726	30.4979	30.5855	29.4061	28.2665	30.9906	30.026	30.3329	31.9126	30.2308	31.0005	28.6232	29.0203	-2.21984	-0.899256	-1.12461	-1.21219	-0.0327356	1.10686	-1.61722	-0.652616	-0.959546	-2.53925	-0.857496	-1.6272	0.750104	0.353034						46.4302							59.4561	78.2936	0.5162	0.5738	1.268	1.043	1.676	1.24	0.5383
HSA-MIR-339-3P	31.6011	0	30.5637	33.9277	29.1606	30.9137	31.4215	29.9638	29.9934	32.863	33.8164	29.8184	31.0959	30.1537	31.6011	0	30.5637	33.9277	29.1606	30.9137	31.4215	29.9638	29.9934	32.863	33.8164	29.8184	31.0959	30.1537	3.06986e-08		6.30087e-08	6.11978e-09	1.6664e-07	4.9437e-08	3.47683e-08	9.5502e-08	9.3558e-08	1.28014e-08	6.61077e-09	1.05628e-07	4.35702e-08	8.37217e-08	1.057	0.6117	0.4704	0.1789	NaN	3.027	0.8225
HSA-MIR-342-5P	31.6031	31.3919	34.0587	29.2006	29.1066	29.4078	32.2329	30.3516	33.084	30.1696	30.8267	29.8533	29.5888	31.2025	31.6031	31.3919	34.0587	29.2006	29.1066	29.4078	32.2329	30.3516	33.084	30.1696	30.8267	29.8533	29.5888	31.2025	3.06558e-08	3.54902e-08	5.5888e-09	1.62083e-07	1.73002e-07	1.40399e-07	1.98117e-08	7.29901e-08	1.09834e-08	8.28006e-08	5.25092e-08	1.03097e-07	1.23848e-07	4.04666e-08	0.8132	3.047	1.03	1.094	1.224	2.42	0.361
HSA-MIR-4318	31.6096	31.6744	31.9304	31.6327	30.9064	30.464	31.0477	32.2296	30.7288		31.7011	30.061	29.4906	30.1991	0.314968	0.25013	-0.00583	0.29184	1.01812	1.4605	0.87681	-0.30511	1.19572	0	0.22339	1.86355	2.43393	1.72547	80.3869	84.0821		81.686	49.3759	36.3367	54.457		43.6569		85.655	27.4799	18.5061	30.24	0.9692	NaN	1.32	0.7147	1.204	0.8321	0.9826
HSA-MIR-554	31.6105	28.136		29.2318	29.1337	29.5283	29.1382		30.1705	28.9676	31.03	29.6209	28.9604	28.8377	-3.2066	0.267906	0	-0.827888	-0.729778	-1.12435	-0.734268	0	-1.76664	-0.563688	-2.62613	-1.21703	-0.556508	-0.433798		83.0524													0.3133	2.715	0.6165	0.3682	4.527	0.9199	1.194
HSA-MIR-214	31.612	30.6635	29.0534	31.694			33.2998	34.0916		28.4854			30.1318	32.1791	31.612	30.6635	29.0534	31.694	0	0	33.2998	34.0916	0	28.4854	0	0	30.1318	32.1791	3.04668e-08	5.87994e-08	1.795e-07	2.87837e-08			9.45691e-09	5.46268e-09		2.66093e-07			8.50034e-08	2.05651e-08	1.002	12.14	0.8765	NaN	2.514	NaN	0.2137
HSA-MIR-1234	31.6205	0	30.6038	29.0715	31.3562	29.5034		32.3955		30.2058	33.5697	33.2674			31.6205	0	30.6038	29.0715	31.3562	29.5034	0	32.3955	0	30.2058	33.5697	33.2674	0	0	3.02897e-08		6.12849e-08	1.77255e-07	3.63781e-08	1.31401e-07		1.77001e-08		8.07499e-08	7.84356e-09	9.67223e-09			1.042	3.852	NaN	0.2119	NaN	0.6598	NaN
HSA-MIR-1911*	31.6258	32.4799			31.6254	34.084	32.7235				34.2456		31.5255		31.6258	32.4799	0	0	31.6254	34.084	32.7235	0	0	0	34.2456	0	31.5255	0	3.01776e-08	1.66948e-08			3.0186e-08	5.49165e-09	1.41012e-08				4.90958e-09		3.23503e-08		3.222	NaN	1.083	0.4119	2.317	1.7	1.034
HSA-MIR-365	31.6346	0	29.3959	31.2514	28.7341	28.6014	30.8933	30.0912	30.579	31.9864	30.7004	33.3859	30.2569	29.7366	2.39609	0	4.6348	2.77925	5.29653	5.4293	3.13738	3.93948	3.45167	2.04431	3.3303	0.644738	3.77383	4.29412	18.9979		4.02519	14.5668	2.54441	2.3207	11.3646	6.51777	9.13996	24.2439	9.94215	63.9609	7.3108	5.09732	0.6727	0.7313	0.548	1.01	NaN	2.649	0.7724
HSA-MIR-516A-5P	31.6517	32.6061	33.8031	33.5863	33.3334	33.513	32.9173	33.1159	32.6099	33.2155	33.8432	31.9819	34.1164	34.758	3.27075	2.31638	1.11939	1.33614	1.58911	1.40941	2.00511	1.80658	2.31252	1.70692	1.07921	2.9406	0.80607	0.16448	10.3611	20.077	46.0288	39.6079	33.2376	37.6466	24.9116	28.5868	20.1309	30.6313	47.3288	13.0254	57.1938	89.225	4.023	1.888	0.2285	0.6921	2.699	0.6614	1.149
HSA-MIR-377	31.6554	31.3051	30.4787		32.595	31.6249		29.7422	31.8011	31.414	31.9851	32.9813	30.8844	32.0512	-0.719046	-0.368753	0.457631	0	-1.6586	-0.688499	0	1.19418	-0.864759	-0.477629	-1.04878	-2.04489	0.0519613	-1.11484			72.8181					43.7034					96.4624		1.295	2.124	0.6929	0.8099	2.147	0.3562	NaN
HSA-MIR-10A*	31.658	0		32.8482	33.1092	33.2099	34.7119	33.7155	31.3685		33.2655	32.7333			31.658	0	0	32.8482	33.1092	33.2099	34.7119	33.7155	31.3685	0	33.2655	32.7333	0	0	2.9511e-08			1.29329e-08	1.0793e-08	1.00654e-08	3.55364e-09	7.08953e-09	3.607e-08		9.68451e-09	1.40054e-08			3.379	NaN	NaN	0.8713	NaN	0.6517	0.2795
HSA-MIR-16-1*	31.6684	32.8554	33.291	30.5691	31.2394	31.106	29.9473	31.773	31.4882	29.7094	32.4571	31.4134	28.8056	32.0692	31.6684	32.8554	33.291	30.5691	31.2394	31.106	29.9473	31.773	31.4882	29.7094	32.4571	31.4134	28.8056	32.0692	2.93005e-08	1.28687e-08	9.51497e-09	6.27755e-08	3.9445e-08	4.32683e-08	9.65985e-08	2.72499e-08	3.31976e-08	1.13915e-07	1.69608e-08	3.49635e-08	2.1313e-07	2.21929e-08	1.063	5.73	2.423	0.4833	0.6066	0.7544	2.406
HSA-MIR-624*	31.6819	30.8474	31.7408		29.9647	29.9324	29.999	31.1698	30.619	31.4544		30.5961	29.9533	32.1697	-2.03358	-1.19904	-2.09249	0	-0.316421	-0.284121	-0.350701	-1.52147	-0.970711	-1.80602	0	-0.947731	-0.304961	-2.52138															0.7922	1.287	0.823	NaN	1.836	1.374	1.747
HSA-MIR-187*	31.705	29.937	31.1665	31.5896	29.4789	29.2333	30.9209	29.0408	30.1394		31.2267	32.3694	27.3978	28.6981	31.705	29.937	31.1665	31.5896	29.4789	29.2333	30.9209	29.0408	30.1394	0	31.2267	32.3694	27.3978	28.6981	2.85664e-08	9.72904e-08	4.14911e-08	3.09453e-08	1.3365e-07	1.58451e-07	4.91919e-08	1.81068e-07	8.45521e-08		3.97948e-08	1.80238e-08	5.65522e-07	2.29621e-07	0.5108	NaN	3.17	0.5591	2.261	1.26	0.6041
HSA-MIR-3200-3P	31.7192	31.1325	29.7038		31.5756	30.7194	32.1248	30.1546		31.8485	34.5082	30.3937	30.76		31.7192	31.1325	29.7038	0	31.5756	30.7194	32.1248	30.1546	0	31.8485	34.5082	30.3937	30.76	0	2.82866e-08	4.24805e-08	1.14358e-07		3.12469e-08	5.65627e-08	2.13541e-08	8.36677e-08		2.58602e-08	4.09252e-09	7.08885e-08	5.49943e-08		1.13	1.433	0.6888	0.1285	2.206	0.6585	0.5861
HSA-MIR-452*	31.7267	34.3	30.9346	31.8573	33.5792	31.754	32.8372	32.4105	33.4778	31.9362	31.9518	31.6863	30.4919	30.6395	-0.18574	-2.75903	0.60637	-0.31633	-2.0382	-0.21303	-1.29622	-0.86951	-1.9368	-0.39524	-0.41078	-0.1453	1.0491	0.90144			65.6847										48.327	53.5352	1.776	2.13	1.31	1.194	0.3878	0.2593	0.5649
HSA-MIR-500A	31.7355	34.5399	31.3413		29.9081	29.944	31.511	33.5783		30.9134	29.7219	31.2573	29.574	30.2145	2.81063	0.0062369	3.20486	0	4.6381	4.60217	3.03514	0.967907	0	3.63283	4.82431	3.28888	4.97213	4.3317	14.2534	99.5686	10.8453		4.016	4.11727	12.1992	51.1247		8.06139	3.52971	10.2317	3.18596	4.96626	1.026	2.517	1.439	3.256	0.191	1.921	0.8236
HSA-MIR-507	31.7381	30.4022	30.2423	33.1554	33.5508	31.1162	32.6748	34.1495	32.4269	30.6698	34.7155	30.718	31.3014	30.2894	-0.796898	0.539002	0.698843	-2.21422	-2.60963	-0.175027	-1.73362	-3.20831	-1.48575	0.271413	-3.77429	0.223163	-0.360237	0.651783		68.8247	61.6066							82.8508		85.6685		63.6493	1.562	4.544	0.6626	0.1558	5.125	0.2345	0.5604
HSA-MIR-32*	31.7387	31.477	31.9772	30.4967		30.3601	31.4594	32.3876	31.4842		31.9586	32.0882	30.9562	30.631	31.7387	31.477	31.9772	30.4967	0	30.3601	31.4594	32.3876	31.4842	0	31.9586	32.0882	30.9562	30.631	2.79053e-08	3.34575e-08	2.36544e-08	6.6003e-08		7.25623e-08	3.38661e-08	1.77971e-08	3.32898e-08		2.39612e-08	2.19018e-08	4.80025e-08	6.01394e-08	1.115	NaN	0.6014	0.7524	1.738	NaN	0.9296
HSA-MIR-374B	31.7475	32.5832	28.923	30.3994	30.9524	28.3937	31.1678	28.8047	31.2067	31.4085	30.2749	30.9137	27.8501	28.2292	31.7475	32.5832	28.923	30.3994	30.9524	28.3937	31.1678	28.8047	31.2067	31.4085	30.2749	30.9137	27.8501	28.2292	2.77365e-08	1.55411e-08	1.96476e-07	7.06119e-08	4.81275e-08	2.83568e-07	4.14537e-08	2.13258e-07	4.03501e-08	3.50825e-08	7.69767e-08	4.9438e-08	4.13327e-07	3.17807e-07	0.466	0.8177	2.177	1.016	0.3394	0.4265	0.4784
HSA-MIR-183	31.7478	33.1928	30.8881	31.993	29.9818	31.3186	32.4712	31.2281	30.6792	29.7792	30.6768	30.477	31.1908	30.9979	31.7478	33.1928	30.8881	31.993	29.9818	31.3186	32.4712	31.2281	30.6792	29.7792	30.6768	30.477	31.1908	30.9979	2.77312e-08	1.0185e-08	5.0321e-08	2.33957e-08	9.43146e-08	3.73397e-08	1.6795e-08	3.97568e-08	5.81601e-08	1.08537e-07	5.8259e-08	6.69113e-08	4.07967e-08	4.66353e-08	0.9212	5.002	0.4248	1.521	0.4398	1.652	0.3832
HSA-MIR-337-3P	31.7544	34.1278	32.8761	31.9991	33.4616	30.286	33.3567	32.0446	31.3864	28.2264	32.5796		33.5931	29.9127	-1.84286	-4.21625	-2.9646	-2.0876	-3.55005	-0.374485	-3.44512	-2.13302	-1.47484	1.68519	-2.66807	0	-3.68154	-0.0012047										31.0963					1.574	25.19	0.1379	0.6979	0.3948	0.2542	0.356
HSA-MIR-1976	31.7566	0	27.7149	30.7373	31.5758	29.7517	29.0963		32.3517		31.6547		30.3044	29.4687	31.7566	0	27.7149	30.7373	31.5758	29.7517	29.0963	0	32.3517	0	31.6547	0	30.3044	29.4687	2.75617e-08		4.53918e-07	5.58676e-08	3.12419e-08	1.10625e-07	1.74236e-07		1.82464e-08		2.9579e-08		7.54176e-08	1.34601e-07	0.5954	NaN	0.5107	0.502	NaN	0.3559	2.585
HSA-MIR-105*	31.7598	30.3825	33.91		31.2296				31.1827	31.6374	30.7855		31.2889	30.3334	31.7598	30.3825	33.91	0	31.2296	0	0	0	31.1827	31.6374	30.7855	0	31.2889	30.3334	2.75013e-08	7.14441e-08	6.19558e-09		3.97146e-08				4.10264e-08	2.99366e-08	5.40326e-08		3.81156e-08	7.39167e-08	0.9514	1.437	0.4133	1.469	3.213	0.7246	NaN
HSA-MIR-33B*	31.7601	29.9457	27.8242	29.4972		28.0414		28.55			30.5463	28.9052			31.7601	29.9457	27.8242	29.4972	0	28.0414	0	28.55	0	0	30.5463	28.9052	0	0	2.74961e-08	9.67028e-08	4.20791e-07	1.31968e-07		3.61981e-07		2.5444e-07			6.37746e-08	1.98915e-07			0.2579	NaN	NaN	0.47	1.179	NaN	NaN
HSA-MIR-4270	31.7713	30.3108	28.8089	30.0706	30.9544	29.9106	30.7684	30.2401		29.88	30.0499	30.0933	29.3701	29.9426	0.949505	2.41003	3.91189	2.65022	1.76639	2.81023	1.95236	2.48069	0	2.8408	2.67091	2.62745	3.35067	2.77824	51.781	18.8152	6.64358	15.9295	29.3942	14.2572	25.8392	17.9158		13.9583	15.7027	16.1829	9.80272	14.5769	0.474	2.44	0.7849	1.228	1.696	0.4404	0.6525
HSA-MIR-346	31.7714	0					34.6652	30.6417		33.2527	34.9605	32.7717		32.6173	31.7714	0	0	0	0	0	34.6652	30.6417	0	33.2527	34.9605	32.7717	0	32.6173	2.72798e-08						3.67048e-09	5.96921e-08		9.77129e-09	2.99113e-09	1.36377e-08		1.51781e-08	2.939	1.46	NaN	0.2532	NaN	NaN	0.2716
HSA-MIR-545	31.7885	32.2522	29.953	32.4355	31.2617	30.0673	29.6803	33.4527	32.0762	31.2873	32.2229	30.9331	30.2049	34.9446	-1.40817	-1.87191	0.427321	-2.05523	-0.881409	0.313001	0.700041	-3.07242	-1.69595	-0.907049	-1.84265	-0.552839	0.175361	-4.56432			74.3641			80.4966	61.5555						88.5546		1.202	2.359	1.129	0.6987	1.133	0.9131	3.559
HSA-MIR-4258	31.7898	30.1219			32.9574						32.7759	31.8073	32.1274	29.655	31.7898	30.1219	0	0	32.9574	0	0	0	0	0	32.7759	31.8073	32.1274	29.655	2.69346e-08	8.55892e-08			1.19906e-08						1.35978e-08	2.66108e-08	2.13147e-08	1.18294e-07	1.29	NaN	0.3201	0.5119	5.33	0.303	NaN
HSA-MIR-543	31.8066	0	30.76	31.8891	32.0436	32.7888	32.5026	32.2773	32.6711	32.4584	31.239	31.4265	31.8355	31.9026	-0.377979	0	0.668541	-0.460559	-0.615019	-1.3602	-1.07405	-0.848739	-1.24257	-1.02987	0.189621	0.0020412	-0.406959	-0.474019			62.9143								87.6836	99.8586			1.589	1.403	0.4881	1.85	NaN	0.711	0.6736
HSA-MIR-628-3P	31.8309	0		30.0405	31.9746	30.8862	32.9606	33.5915				29.8606	32.7031		31.8309	0	0	30.0405	31.9746	30.8862	32.9606	33.5915	0	0	0	29.8606	32.7031	0	2.61793e-08			9.05535e-08	2.36971e-08	5.0388e-08	1.19636e-08	7.72566e-09				1.0258e-07	1.4302e-08		1.584	NaN	0.2712	NaN	NaN	0.756	0.497
HSA-MIR-569	31.8476	32.9056	32.818					33.6804						33.2951	0.200647	-0.857342	-0.769757	0	0	0	0	-1.63212	0	0	0	0	0	-1.24686	87.016														2.665	NaN	NaN	NaN	1.664	NaN	NaN
HSA-LET-7E*	31.892	0	34.3824		32.2219	30.2833		32.7607		31.8158	32.3936		31.0693	33.2921	31.892	0	34.3824	0	32.2219	30.2833	0	32.7607	0	31.8158	32.3936	0	31.0693	33.2921	2.50934e-08		4.46546e-09		1.99639e-08	7.65298e-08		1.37419e-08		2.64548e-08	1.7724e-08		4.4381e-08	9.50798e-09	2.075	3.034	1.15	1.151	NaN	0.8704	NaN
HSA-MIR-320E	31.916	33.8626	32.302	31.3937	33.1386	33.0624	34.855	33.4909	34.5548	31.9253	31.2217	33.125	31.8982		0.45577	-1.49083	0.06984	0.97809	-0.76678	-0.69056	-2.48315	-1.11909	-2.18299	0.44653	1.1501	-0.75322	0.47367	0	72.9121		95.2744	50.7651						73.3806	45.0594		72.013		2.503	3.45	0.7943	3.182	0.8439	0.5656	0.2242
HSA-MIR-302F	31.9282	0		31.9157	33.3368	31.0921							33.8199		-2.54192	0	0	-2.52936	-3.95045	-1.7058	0	0	0	0	0	0	-4.43357	0															2.513	NaN	0.2123	NaN	NaN	0.4992	NaN
HSA-MIR-432*	31.9508	32.3401		31.7988			33.4937	30.0441	32.341		33.4301	32.5243	30.1605	29.2523	31.9508	32.3401	0	31.7988	0	0	33.4937	30.0441	32.341	0	33.4301	32.5243	30.1605	29.2523	2.40904e-08	1.83932e-08		2.67673e-08			8.26789e-09	9.03266e-08	1.83823e-08		8.64076e-09	1.61885e-08	8.3328e-08	1.56383e-07	1.098	NaN	1.191	0.3096	1.09	NaN	0.2589
HSA-MIR-409-3P	31.9748	0	30.6151	30.6315	32.7718	31.6021		30.5337	32.2058	31.5937	31.9055	32.4368	31.3503	31.9929	0.139113	0	1.49884	1.48246	-0.65788	0.51182	0	1.58029	-0.09185	0.5202	0.20848	-0.32289	0.76367	0.12104	90.8077		35.3838	35.7878		70.1337		33.4415		69.7275	86.5449		58.8996	91.9525	1.119	2.021	0.5406	0.9223	NaN	0.3396	NaN
HSA-MIR-302D	31.9762	32.1199	32.8343	31.3384	32.8392	32.4098	32.8371	34.2978	32.9885	32.6138	32.3184	31.3378	31.9399	33.3734	-0.553801	-0.697494	-1.41191	0.0839962	-1.41683	-0.987414	-1.41474	-2.87542	-1.56615	-1.1914	-0.895974	0.0845962	-0.517504	-1.95106				94.3441								94.3048			1.975	1.761	0.6349	1.224	2.324	0.5727	0.7469
HSA-MIR-30E*	31.979	30.2969	29.4419	32.3479	30.1048	30.6834	32.3624	29.9939	30.6821	30.1029	31.7993	31.0301	29.7267	30.4378	31.979	30.2969	29.4419	32.3479	30.1048	30.6834	32.3624	29.9939	30.6821	30.1029	31.7993	31.0301	29.7267	30.4378	2.36252e-08	7.58075e-08	1.37125e-07	1.82946e-08	8.66092e-08	5.79919e-08	1.81116e-08	9.35295e-08	5.80442e-08	8.67216e-08	2.67589e-08	4.56031e-08	1.12553e-07	6.87563e-08	0.5938	3.024	0.8868	0.5285	2.477	1.148	0.3127
HSA-MIR-1468	31.9945	31.4919	29.1555	33.3249	32.5308	30.8106	33.7854	32.1888	33.2958	31.8239	34.0379	30.6932		32.283	31.9945	31.4919	29.1555	33.3249	32.5308	30.8106	33.7854	32.1888	33.2958	31.8239	34.0379	30.6932	0	32.283	2.33715e-08	3.31121e-08	1.67232e-07	9.29432e-09	1.61162e-08	5.30992e-08	6.75413e-09	2.04276e-08	9.48336e-09	2.63058e-08	5.66973e-09	5.76005e-08		1.91363e-08	1.377	2.15	NaN	0.2625	2.536	0.5009	0.2734
HSA-MIR-329	31.9948	0				31.3647			30.8973				32.8184		31.9948	0	0	0	0	31.3647	0	0	30.8973	0	0	0	32.8184	0	2.33679e-08					3.61659e-08			5.00001e-08				1.32027e-08		1.385	NaN	0.2454	NaN	NaN	NaN	NaN
HSA-MIR-518E*	31.9961	0	30.4814	31.06		29.0063	29.7755		30.8544	30.5275	28.676	30.214	29.0682	28.746	-1.16465	0	0.350055	-0.228525	0	1.82518	1.05602	0	-0.0228947	0.304025	2.15546	0.617485	1.76325	2.08554			78.4554			28.2207	48.0959			80.9989	22.4462	65.1806	29.4585	23.5609	0.3471	1.333	0.8279	2.724	NaN	NaN	1.111
HSA-MIR-3197	32.0037	32.8222	32.0741		32.1932	33.9072	31.5021			30.6466	32.2589	34.5857	30.8636		32.0037	32.8222	32.0741	0	32.1932	33.9072	31.5021	0	0	30.6466	32.2589	34.5857	30.8636	0	2.32227e-08	1.3168e-08	2.21169e-08		2.0365e-08	6.20736e-09	3.28791e-08			5.94935e-08	1.94585e-08	3.8785e-09	5.11854e-08		1.759	6.251	1.215	1.158	1.297	0.8136	1.711
HSA-MIR-345	32.0157	30.6008	30.12	33.3456	28.9848	29.2311	30.5107	30.3163	30.5926	31.8757	30.237	31.5789	29.3737	29.7308	32.0157	30.6008	30.12	33.3456	28.9848	29.2311	30.5107	30.3163	30.5926	31.8757	30.237	31.5789	29.3737	29.7308	2.30319e-08	6.14099e-08	8.56962e-08	9.16166e-09	1.88236e-07	1.5869e-07	6.53665e-08	7.47965e-08	6.17586e-08	2.53777e-08	7.90213e-08	3.11739e-08	1.43761e-07	1.1224e-07	0.5121	0.7828	1.002	1.381	1.775	2.207	0.9983
HSA-MIR-524-5P	32.0182	33.2801	34.4366		32.8359	29.541	32.5392	34.1607		34.6711			30.8155	32.0455	1.19966	-0.06222	-1.21877	0	0.38196	3.67684	0.67861	-0.94289	0	-1.45328	0	0	2.4023	1.17237	43.5379				76.7394	7.81917	62.4767						18.9163	44.3692	2.357	0.5199	1.7	NaN	1.278	0.7053	1.128
HSA-MIR-199A-3P	32.051	29.8711	33.2555	29.3569	28.051	27.8956	29.5597	27.2707	29.0038	31.4139	28.805	28.8716	27.2934	26.984	-2.85367	-0.673773	-4.05816	-0.159507	1.14635	1.30177	-0.362287	1.9267	0.193573	-2.21656	0.392413	0.325743	1.90393	2.21336					45.1766	40.5627		26.303	87.4437		76.1854	79.7887	26.7214	21.5631	0.1967	0.4244	1.668	1.466	1.159	1.66	0.7597
HSA-MIR-627	32.0528	31.4288	33.7124		33.5874	31.0361	32.9821	30.9621	31.4116			32.8432	32.1709	31.7887	32.0528	31.4288	33.7124	0	33.5874	31.0361	32.9821	30.9621	31.4116	0	0	32.8432	32.1709	31.7887	2.24471e-08	3.45925e-08	7.10487e-09		7.74819e-09	4.54166e-08	1.17865e-08	4.7807e-08	3.50074e-08			1.29785e-08	2.06822e-08	2.6955e-08	1.644	NaN	0.4748	NaN	3.293	0.2993	0.5929
HSA-MIR-193A-5P	32.0534	30.9556	30.4769		29.004	30.121	30.2138	31.9008		31.2614	31.7114	31.7496	30.3693	31.5116	32.0534	30.9556	30.4769	0	29.004	30.121	30.2138	31.9008	0	31.2614	31.7114	31.7496	30.3693	31.5116	2.24372e-08	4.802e-08	6.69169e-08		1.85748e-07	8.56421e-08	8.03051e-08	2.4941e-08		3.88483e-08	2.84392e-08	2.76959e-08	7.20971e-08	3.2664e-08	0.6959	1.672	0.701	0.6931	1.936	3.039	1.711
HSA-MIR-425*	32.0648	30.3334	29.7383	32.1837	29.0497	27.6321	33.5404	30.0279	30.6265	31.9251	31.9925	31.2136	29.0816	30.3235	32.0648	30.3334	29.7383	32.1837	29.0497	27.6321	33.5404	30.0279	30.6265	31.9251	31.9925	31.2136	29.0816	30.3235	2.22606e-08	7.39149e-08	1.11655e-07	2.04998e-08	1.79958e-07	4.80752e-07	8.00443e-09	9.13498e-08	6.03265e-08	2.45239e-08	2.34046e-08	4.0157e-08	1.76016e-07	7.44252e-08	0.5258	0.8035	1.303	0.4344	2.269	2.242	0.1298
HSA-MIR-302A	32.0823	32.5433	33.9303	33.6877		32.7013	32.5156	32.5776	33.7917	32.247	31.8083	32.5551		32.4798	0.10428	-0.356713	-1.74371	-1.50107	0	-0.51469	-0.32893	-0.39099	-1.60505	-0.06041	0.37838	-0.36851	0	-0.29317	93.0269										76.9301				1.946	2.408	NaN	1.849	1.837	NaN	0.9898
HSA-MIR-340	32.0881	32.5369	30.8302		30.432	28.084	31.7422	32.2761	32.3344		30.0418	31.8692	29.7516	29.3262	-0.418333	-0.867097	0.839573	0	1.23777	3.58586	-0.0724168	-0.606317	-0.664587	0	1.62799	-0.199407	1.91818	2.34358			55.8809		42.4027	8.32813					32.3538		26.4587	19.702	0.6712	NaN	1.063	2.178	0.6392	1.116	0.5859
HSA-MIR-100	32.1216	29.7758	28.3564	30.6312	28.1874	30.3922	29.2253	28.2644	29.8489	30.6442	30.6457	31.1022	29.2542	31.8687	-2.15765	0.188155	1.60763	-0.667155	1.77657	-0.428165	0.738715	1.69965	0.115135	-0.680205	-0.681685	-1.13817	0.709815	-1.90472		87.7727	32.8138		29.1878		59.9273	30.7862	92.3296				61.1399		0.3171	1.225	0.7255	0.6932	2.096	2.557	1.622
HSA-MIR-766	32.1237	29.6104	26.8217	31.3341	30.3229	27.8818		28.0788		28.0477		28.715	28.5178		32.1237	29.6104	26.8217	31.3341	30.3229	27.8818	0	28.0788	0	28.0477	0	28.715	28.5178	0	2.13695e-08	1.22003e-07	8.4307e-07	3.69399e-08	7.44572e-08	4.0435e-07		3.5273e-07		3.60423e-07		2.26954e-07	2.60179e-07		0.1813	4.241	0.6918	NaN	1.345	0.3331	NaN
HSA-MIR-369-3P	32.1282	0		31.4617				31.7386	31.1099		32.5127	31.3881	29.5299	31.5589	32.1282	0	0	31.4617	0	0	0	31.7386	31.1099	0	32.5127	31.3881	29.5299	31.5589	2.13031e-08			3.38124e-08				2.79075e-08	4.31497e-08		1.63191e-08	3.55818e-08	1.2901e-07	3.16102e-08	0.824	NaN	1.564	0.496	NaN	NaN	NaN
HSA-MIR-4282	32.1339	0	32.6565	33.5471	31.3804		31.3408		31.4079	29.4118	30.0673	30.3504	31.3502		0.200494	0	-0.322105	-1.21265	0.954075	0	0.993675	0	0.926575	2.92264	2.2671	1.98398	0.984224	0	87.0252				51.6173		50.2197		52.6106	13.1885	20.7746	25.2791	50.5497		0.7264	6.649	0.392	2.391	NaN	0.6459	0.8645
HSA-MIR-147	32.1574	30.3136	30.3879	30.0951	33.4018	30.7028	32.3879	30.3381	31.7415		32.6484	33.9122	31.4701	30.5889	-1.83311	0.0107098	-0.0636016	0.229228	-3.07748	-0.378462	-2.06361	-0.0137516	-1.41717	0	-2.32406	-3.58785	-1.14581	-0.264592		99.2604		85.3091											0.9361	NaN	0.4725	0.5233	4.368	0.2084	0.548
HSA-MIR-639	32.1677	0					31.0031			30.187	30.9286	32.7964	30.87	30.5531	-2.75128	0	0	0	0	0	-1.58675	0	0	-0.770648	-1.51223	-3.38	-1.4536	-1.13677															0.7231	3.959	0.5572	1.341	NaN	NaN	1.113
HSA-MIR-320D	32.1743	33.4969	31.9732	32.586	31.3742	30.1716	32.4975	33.2505	33.5109	32.1765	32.1406	31.4921	32.2764	33.2127	32.1743	33.4969	31.9732	32.586	31.3742	30.1716	32.4975	33.2505	33.5109	32.1765	32.1406	31.4921	32.2764	33.2127	2.06336e-08	8.24978e-09	2.37204e-08	1.55105e-08	3.59268e-08	8.26893e-08	1.64917e-08	9.78573e-09	8.1699e-09	2.0602e-08	2.11206e-08	3.31073e-08	1.9223e-08	1.00454e-08	1.492	2.067	0.4357	1.2	0.7755	1.37	0.8191
HSA-MIR-1293	32.1744	31.352	30.1947	29.6366		29.3785			34.2679	32.008	30.3897		30.9975		32.1744	31.352	30.1947	29.6366	0	29.3785	0	0	34.2679	32.008	30.3897	0	30.9975	0	2.06316e-08	3.64833e-08	8.1373e-08	1.19808e-07		1.43286e-07			4.83434e-09	2.31545e-08	7.10882e-08		4.66469e-08		0.5999	0.9339	0.4251	1.624	1.379	NaN	NaN
HSA-MIR-577	32.193	0				30.6776	33.3093							29.6132	32.193	0	0	0	0	30.6776	33.3093	0	0	0	0	0	0	29.6132	2.03675e-08					5.82267e-08	9.3953e-09							1.21771e-07	1.029	NaN	NaN	NaN	NaN	NaN	0.3259
HSA-MIR-548Q	32.201	34.92					31.6296				32.9909		30.4441		32.201	34.92	0	0	0	0	31.6296	0	0	0	32.9909	0	30.4441	0	2.02557e-08	3.07633e-09					3.00985e-08				1.17151e-08		6.84548e-08		1.595	NaN	1.689	0.7247	0.3148	NaN	1.627
HSA-MIR-885-5P	32.2031	0	26.5301	33.6988	30.3176		30.9649	31.0196	33.5508	33.0016	29.5611		28.5163	28.166	32.2031	0	26.5301	33.6988	30.3176	0	30.9649	31.0196	33.5508	33.0016	29.5611	0	28.5163	28.166	2.02252e-08		1.03189e-06	7.17197e-09	7.47317e-08		4.77136e-08	4.59384e-08	7.94677e-09	1.16285e-08	1.26251e-07		2.60464e-07	3.32039e-07	0.4579	0.3652	1.848	2.246	NaN	0.8923	0.7419
HSA-MIR-1249	32.2067	28.1291	26.501			27.6414		27.137	32.0634			28.0014	26.929		32.2067	28.1291	26.501	0	0	27.6414	0	27.137	32.0634	0	0	28.0014	26.929	0	2.01749e-08	3.40646e-07	1.0529e-06			4.7766e-07		6.77548e-07	2.22822e-08			3.72163e-07	7.82648e-07		0.1162	NaN	1.414	NaN	2.551	NaN	NaN
HSA-MIR-520C-3P	32.2227	31.3188	30.2929			34.0334	31.0073								32.2227	31.3188	30.2929	0	0	34.0334	31.0073	0	0	0	0	0	0	0	1.9953e-08	3.73336e-08	7.60212e-08			5.68771e-09	4.63324e-08								1.019	NaN	NaN	NaN	2.479	NaN	1.625
HSA-MIR-525-3P	32.2267	30.0037	30.2707	33.1191	31.2735	28.5154	28.7658	28.7978	30.9373	30.4336	27.8415	29.5883	28.7284	28.4371	-2.50565	-0.2826	-0.549638	-3.39799	-1.55242	1.20574	0.955272	0.923342	-1.21626	-0.712508	1.87963	0.132832	0.992642	1.28394						43.3546	51.5744	52.7286			27.1753	91.2039	50.2557	41.0672	0.2785	1.339	0.8423	4.573	1.69	0.2844	2.106
HSA-MIR-566	32.2317	32.0667	29.1537	32.5639	30.9459	28.5675	30.9719	31.7101	31.4588	32.2284	30.4436	30.6502	30.8891	28.7412	-2.8556	-2.69052	0.222411	-3.18774	-1.56976	0.808671	-1.59576	-2.33394	-2.08266	-2.85223	-1.0675	-1.2741	-1.51292	0.634901			85.7132			57.0907								64.3985	0.5451	0.7579	0.6091	1.479	0.7944	0.7009	0.8965
HSA-MIR-583	32.2378	0			32.3055			31.5597					34.5517		32.2378	0	0	0	32.3055	0	0	31.5597	0	0	0	0	34.5517	0	1.97444e-08				1.88399e-08			3.15918e-08					3.97091e-09		2.457	NaN	0.1549	NaN	NaN	1.236	NaN
HSA-MIR-3652	32.2394	31.6355	30.508	33.7968	31.0842	31.3816	32.2241		33.0506	34.2582	30.2557	32.6121	33.1439	32.9006	1.42807	2.03203	3.15945	-0.12931	2.58324	2.28593	1.44339	0	0.61686	-0.59067	3.41175	1.05537	0.52362	0.76689	37.1627	24.4511	11.1921		16.6866	20.5053	36.7702		65.2089		9.39639	48.1174	69.5624	58.7683	1.325	0.4537	0.2219	4.118	2.618	1.557	0.9199
HSA-MIR-326	32.2451	30.6465	28.6769	34.4636		29.8097	29.8058	29.555	33.6548		33.0392		27.9891	30.9837	32.2451	30.6465	28.6769	34.4636	0	29.8097	29.8058	29.555	33.6548	0	33.0392	0	27.9891	30.9837	1.96449e-08	5.94958e-08	2.33017e-07	4.22113e-09		1.06265e-07	1.06552e-07	1.26786e-07	7.39443e-09		1.13293e-08		3.75362e-07	4.70959e-08	0.5828	NaN	3.49	0.2641	2.294	NaN	2.171
HSA-MIR-4296	32.2513	32.4917	28.8016		30.2222			31.4391	31.4842	32.6367	34.528	30.5605	30.7979		-1.8235	-2.06394	1.62622	0	0.205619	0	0	-1.01127	-1.05644	-2.20893	-4.10023	-0.132701	-0.370061	0			32.3936		86.7167										0.7541	0.8008	0.6473	0.1223	0.8297	1.623	NaN
HSA-MIR-299-5P	32.2673	0	31.7044								34.98	33.1468	33.5862	33.566	32.2673	0	31.7044	0	0	0	0	0	0	0	34.98	33.1468	33.5862	33.566	1.93457e-08		2.85767e-08								2.95105e-09	1.05155e-08	7.75453e-09	7.86349e-09	2.964	NaN	0.3724	0.3552	NaN	NaN	NaN
HSA-MIR-633	32.2731	32.535	33.5112	32.3581	32.8717	31.861	31.3367	30.9481	33.4802	31.0689	32.6661		31.6406	33.0399	-2.08046	-2.34233	-3.31858	-2.16542	-2.67905	-1.66837	-1.14405	-0.755508	-3.28754	-0.876218	-2.47348	0	-1.44798	-2.84726															1.359	4.343	0.6602	0.813	1.473	0.4732	1.786
HSA-MIR-149	32.274	0	32.9565				31.3696	31.1742		31.5717		31.402			32.274	0	32.9565	0	0	0	31.3696	31.1742	0	31.5717	0	31.402	0	0	1.92551e-08		1.1998e-08				3.60428e-08	4.12694e-08		3.13308e-08		3.52414e-08			0.8882	2.005	NaN	NaN	NaN	NaN	1.142
HSA-MIR-663B	32.3165	33.0726	29.8682	31.6063	30.5661	28.1376	32.6773	29.6183		30.6729	31.0096	32.6136	29.6855	30.2264	32.3165	33.0726	29.8682	31.6063	30.5661	28.1376	32.6773	29.6183	0	30.6729	31.0096	32.6136	29.6855	30.2264	1.8697e-08	1.10705e-08	1.02043e-07	3.05885e-08	6.29075e-08	3.38633e-07	1.45601e-08	1.21336e-07		5.84167e-08	4.6256e-08	1.52164e-08	1.1582e-07	7.9609e-08	0.5507	2.387	1.069	1.071	0.4239	0.9773	0.2946
HSA-MIR-130B	32.3274	33.9439	33.7555		31.0731	30.3332	29.9305	31.1638			31.5751	31.7936	30.8052	32.5857	32.3274	33.9439	33.7555	0	31.0731	30.3332	29.9305	31.1638	0	0	31.5751	31.7936	30.8052	32.5857	1.85556e-08	6.05169e-09	6.89585e-09		4.42645e-08	7.39244e-08	9.77293e-08	4.15691e-08			3.12579e-08	2.68649e-08	5.32972e-08	1.55136e-08	1.078	NaN	0.9707	1.427	0.457	1.356	3.9
HSA-MIR-3937	32.3282	30.528		33.582	32.018	34.0035	29.8697	31.6879	30.941	29.8273	31.3802	30.5219	33.6158	33.7564	32.3282	30.528	0	33.582	32.018	34.0035	29.8697	31.6879	30.941	29.8273	31.3802	30.5219	33.6158	33.7564	1.85457e-08	6.45902e-08		7.77692e-09	2.29937e-08	5.80658e-09	1.01936e-07	2.89072e-08	4.85089e-08	1.04975e-07	3.57782e-08	6.48614e-08	7.59694e-09	6.89165e-09	0.9763	7.666	0.1254	1.48	4.42	0.6384	3.685
HSA-MIR-365*	32.3491	0												34.8228	32.3491	0	0	0	0	0	0	0	0	0	0	0	0	34.8228	1.82795e-08													3.29078e-09	3.133	NaN	NaN	NaN	NaN	NaN	NaN
HSA-MIR-320B	32.3492	32.6801	32.9241	32.7862	32.5752	32.7903	32.0164					32.2264	31.1224		32.3492	32.6801	32.9241	32.7862	32.5752	32.7903	32.0164	0	0	0	0	32.2264	31.1224	0	1.82774e-08	1.45312e-08	1.22706e-08	1.35015e-08	1.56275e-08	1.34628e-08	2.30196e-08					1.99014e-08	4.27784e-08		1.539	NaN	1.129	NaN	1.591	0.6941	1.331
HSA-MIR-1909*	32.3618	0	32.5097	34.8305	33.0637	30.2139	31.7497			31.453	32.8862	33.0368			32.3618	0	32.5097	34.8305	33.0637	30.2139	31.7497	0	0	31.453	32.8862	33.0368	0	0	1.81184e-08		1.63528e-08	3.27324e-09	1.11384e-08	8.03012e-08	2.76936e-08			3.40174e-08	1.25972e-08	1.13481e-08			1.436	3.741	NaN	0.7847	NaN	0.4657	1.508
HSA-MIR-1914*	32.4183	32.702		29.2205	30.0866	29.665	30.4655	33.3033	29.104		31.3917	33.0944	29.554		-0.05287	-0.336593	0	3.14492	2.27879	2.70037	1.89994	-0.93792	3.2614	0	0.97372	-0.72898	2.81144	0				11.3054	20.6071	15.3854	26.7955		10.4285		50.9191		14.2453		0.5262	NaN	1.201	0.8423	0.5619	1.397	1.399
HSA-MIR-3125	32.4484	32.9296	31.5642		31.7144	32.89	31.9921	30.3834	33.0813	34.7558	32.0142	32.3998	31.6567	30.1896	32.4484	32.9296	31.5642	0	31.7144	32.89	31.9921	30.3834	33.0813	34.7558	32.0142	32.3998	31.6567	30.1896	1.70627e-08	1.22239e-08	3.14945e-08		2.83809e-08	1.25635e-08	2.34114e-08	7.13998e-08	1.10036e-08	3.44709e-09	2.30547e-08	1.76477e-08	2.95388e-08	8.16657e-08	1.146	0.3212	0.622	1.217	1.067	1.005	1.08
HSA-MIR-1303	32.4679	0	30.6861	31.9861	31.1564	29.3942	33.0072			31.9272	32.9125	31.2407	33.8316	32.0157	32.4679	0	30.6861	31.9861	31.1564	29.3942	33.0072	0	0	31.9272	32.9125	31.2407	33.8316	32.0157	1.68342e-08		5.78835e-08	2.35086e-08	4.17811e-08	1.41735e-07	1.15835e-08			2.44883e-08	1.23697e-08	3.94103e-08	6.54131e-09	2.30303e-08	0.9892	1.996	0.1205	0.5711	NaN	1.295	0.4675
HSA-MIR-1915*	32.4905	0				32.0251	33.1656	33.0465		30.1904	32.5492	32.2816	33.0634		32.4905	0	0	0	0	32.0251	33.1656	33.0465	0	30.1904	32.5492	32.2816	33.0634	0	1.65718e-08					2.28812e-08	1.03792e-08	1.12724e-08		8.16193e-08	1.59115e-08	1.91541e-08	1.11409e-08		1.43	9.767	0.3013	1.079	NaN	NaN	0.615
HSA-MIR-3923	32.495	0	30.7688				30.7154	30.211			31.398		31.7796		32.495	0	30.7688	0	0	0	30.7154	30.211	0	0	31.398	0	31.7796	0	1.65209e-08		5.46613e-08				5.67197e-08	8.04622e-08			3.53405e-08		2.71263e-08		0.6507	NaN	0.3349	1.094	NaN	NaN	1.534
HSA-MIR-485-5P	32.5174	31.5997	32.9246	34.2042	32.2889	33.0196	30.3772	30.6571	30.0364	31.7934	33.6082	32.2	31.1381	31.9004	-5.32643	-4.40871	-5.73364	-7.01327	-5.09798	-5.82867	-3.18624	-3.46613	-2.84545	-4.60242	-6.41719	-5.00904	-3.94719	-4.70948															0.9617	2.204	0.7842	0.3548	2.361	0.5942	2.912
HSA-MIR-564	32.5646	32.2609	32.0055	34.5993	34.2257	31.8402	33.8597	30.2278		31.5416		33.4587	31.3628	33.0205	-3.08249	-2.77881	-2.52344	-5.11726	-4.74362	-2.35812	-4.3776	-0.745719	0	-2.05951	0	-3.97665	-1.88074	-3.53847															1.473	4.151	1.062	NaN	2.363	0.2456	0.4122
HSA-MIR-605	32.5797	0		34.0549	33.7707		32.8007	30.9552					33.7384	31.9034	32.5797	0	0	34.0549	33.7707	0	32.8007	30.9552	0	0	0	0	33.7384	31.9034	1.55786e-08			5.60327e-09	6.82344e-09		1.33661e-08	4.80332e-08					6.97778e-09	2.48951e-08	1.887	NaN	0.2649	NaN	NaN	0.4359	1.112
HSA-MIR-802	32.6017	0							31.551	32.1316					32.6017	0	0	0	0	0	0	0	31.551	32.1316	0	0	0	0	1.53426e-08								3.1784e-08	2.12532e-08					0.5409	1.039	NaN	NaN	NaN	NaN	NaN
HSA-MIR-4279	32.6242	30.4855	29.9525	34.7995		31.9948	30.5992	32.2605	33.6429	29.5564	32.8917	32.7354	30.9074	33.5494	-4.09311	-1.95447	-1.42149	-6.2684	0	-3.46377	-2.06815	-3.72943	-5.11185	-1.02532	-4.36063	-4.20431	-2.37633	-5.01835															0.8591	9.993	0.8852	0.5608	4.917	NaN	2.401
HSA-MIR-1827	32.6396	34.2924		32.4098	33.6907	30.2088		30.2463				33.8715	28.9035	31.8985	32.6396	34.2924	0	32.4098	33.6907	30.2088	0	30.2463	0	0	0	33.8715	28.9035	31.8985	1.49449e-08	4.75303e-09		1.75252e-08	7.2126e-09	8.05844e-08		7.8513e-08				6.3631e-09	1.99155e-07	2.49796e-08	1.032	NaN	4.311	NaN	0.4267	0.2627	NaN
HSA-MIR-3131	32.653	31.3005		31.0667	33.5365						32.3732	32.7357	32.4343		32.653	31.3005	0	31.0667	33.5365	0	0	0	0	0	32.3732	32.7357	32.4343	0	1.48074e-08	3.78099e-08		4.44619e-08	8.02604e-09						1.79757e-08	1.39823e-08	1.72303e-08		1.04	NaN	0.3793	0.992	3.452	0.2973	NaN
HSA-MIR-328	32.6598	0	29.018	30.0653	30.2152	27.4117	29.2669	29.1231	30.5703	30.7137	28.7919	29.8797	28.3101	29.8855	32.6598	0	29.018	30.0653	30.2152	27.4117	29.2669	29.1231	30.5703	30.7137	28.7919	29.8797	28.3101	29.8855	1.47369e-08		1.83952e-07	8.90102e-08	8.02294e-08	5.60107e-07	1.54806e-07	1.71029e-07	6.27207e-08	5.67894e-08	2.15169e-07	1.01232e-07	3.00477e-07	1.00828e-07	0.1806	0.9654	1.154	2.072	NaN	0.5185	1.303
HSA-MIR-548B-5P	32.6667	0	31.1763	31.8176	32.1197	30.2754	30.6929	32.9031	31.7525	31.3668	34.742	31.131	32.8199	31.1728	32.6667	0	31.1763	31.8176	32.1197	30.2754	30.6929	32.9031	31.7525	31.3668	34.742	31.131	32.8199	31.1728	1.46668e-08		4.12096e-08	2.64217e-08	2.14288e-08	7.69494e-08	5.76109e-08	1.24504e-08	2.7641e-08	3.61131e-08	3.48032e-09	4.25247e-08	1.31899e-08	4.13106e-08	0.8314	2.84	0.2344	0.155	NaN	0.6406	2.243
HSA-MIR-18A	32.6821	32.418	32.0279	33.6207	32.1553	29.3435	31.7399	30.1595		34.0422	32.8785	30.0008	30.7079	31.0271	0.276001	0.540105	0.930245	-0.662555	0.802825	3.61459	1.21818	2.79858	0	-1.08405	0.0796346	2.95727	2.2502	1.93102	82.5877	68.7721	52.4769		57.3226	8.16392	42.9823	14.3728			94.6297	12.8757	21.0194	26.2243	0.7575	0.4094	0.933	0.5195	1.182	0.5756	0.9997
HSA-MIR-3194	32.6898	0	29.9663		30.5501	31.1864			32.3111		31.2021	34.9573	31.6601	32.9808	-2.02523	0	0.698342	0	0.114532	-0.521818	0	0	-1.6465	0	-0.537458	-4.29269	-0.995468	-2.31625			61.628		92.3682										0.9321	NaN	0.5965	2.054	NaN	2.166	NaN
HSA-MIR-454*	32.7137	0	30.6807			30.207	30.8167	33.4636			33.5735	34.1518	32.1005	32.5079	-0.963608	0	1.06937	0	0	1.54306	0.933336	-1.71357	0	0	-1.82346	-2.40177	-0.350494	-0.757894			47.6528			34.3158	52.3646								1.237	NaN	0.5928	0.5353	NaN	NaN	3.163
HSA-MIR-3150B	32.714	33.7443	33.9792			29.2497	31.2949	30.5351						30.586	32.714	33.7443	33.9792	0	0	29.2497	31.2949	30.5351	0	0	0	0	0	30.586	1.41943e-08	6.94962e-09	5.90538e-09			1.56664e-07	3.79584e-08	6.42711e-08						6.20444e-08	0.757	NaN	NaN	NaN	0.4818	NaN	1.39
HSA-MIR-154	32.7612	30.5933	34.9788	32.7476	31.3699	28.6306	31.7329	29.8002	29.5396	30.1252	29.0221	32.0439	32.153	31.1521	32.7612	30.5933	34.9788	32.7476	31.3699	28.6306	31.7329	29.8002	29.5396	30.1252	29.0221	32.0439	32.153	31.1521	1.37376e-08	6.17309e-08	2.95351e-09	1.38672e-08	3.60343e-08	2.40623e-07	2.80181e-08	1.06967e-07	1.28141e-07	8.53896e-08	1.83438e-07	2.25853e-08	2.094e-08	4.1907e-08	0.457	3.94	0.2184	4.795	2.669	0.6322	0.6401
HSA-MIR-606	32.7816	0				32.5384								32.3302	0.00552	0	0	0	0	0.24869	0	0	0	0	0	0	0	0.45691	99.6181					84.166								72.8545	1.553	NaN	NaN	NaN	NaN	NaN	NaN
HSA-MIR-526A	32.8061	31.1738			34.6872	30.9284	31.8859			32.218	32.1399	32.7786	31.9618	32.3949	-0.819138	0.813152	0	0	-2.70028	1.05856	0.100976	0	0	-0.231124	-0.152954	-0.791664	0.0250856	-0.408004		56.9137				48.0112	93.2402						98.2762		1.045	2.178	0.5879	1.303	4.21	0.1496	1.358
HSA-MIR-92B*	32.8232	0	29.5635	30.6864	29.1307	28.2203	30.5295	28.3967	30.3943	33.2449	31.8024	31.0839	29.8125	31.3894	32.8232	0	29.5635	30.6864	29.1307	28.2203	30.5295	28.3967	30.3943	33.2449	31.8024	31.0839	29.8125	31.3894	1.3159e-08		1.26033e-07	5.78722e-08	1.70133e-07	3.19772e-07	6.45233e-08	2.82971e-07	7.08595e-08	9.82426e-09	2.67015e-08	4.39347e-08	1.06056e-07	3.55505e-08	0.2925	0.3029	0.7389	0.4663	NaN	1.994	0.985
HSA-MIR-1247	32.8317	32.0166	29.1923		30.0191	32.0859	29.1024	29.6343	31.9541		33.0166	30.5489	30.2945		-3.81531	-3.00016	-0.175926	0	-1.00267	-3.06955	-0.0860363	-0.617856	-2.9377	0	-4.0002	-1.53255	-1.27812	0															0.4027	NaN	0.7328	0.2784	0.9211	1.492	3.669
HSA-MIR-3670	32.8402	33.3242		34.8079	33.9362	30.5195	30.6664	31.5672		29.6646	32.8512	30.2774	31.2979	31.8153	32.8402	33.3242	0	34.8079	33.9362	30.5195	30.6664	31.5672	0	29.6646	32.8512	30.2774	31.2979	31.8153	1.3005e-08	9.29875e-09		3.32494e-09	6.08395e-09	6.49699e-08	5.86817e-08	3.14293e-08		1.17508e-07	1.29066e-08	7.68412e-08	3.78796e-08	2.64625e-08	0.7895	9.896	0.7208	0.6157	0.7338	0.1948	2.447
HSA-MIR-28-5P	32.8634	0	30.3985		31.6035	33.0037	31.7596	31.8409		33.8707	33.6105	31.79	30.8547	29.4162	32.8634	0	30.3985	0	31.6035	33.0037	31.7596	31.8409	0	33.8707	33.6105	31.79	30.8547	29.4162	1.27979e-08		7.0655e-08		3.06477e-08	1.1612e-08	2.7504e-08	2.59976e-08		6.36649e-09	7.62501e-09	2.69307e-08	5.1501e-08	1.3959e-07	0.8241	0.5687	1.039	0.3858	NaN	1.041	1.216
HSA-MIR-595	32.8878	33.013		32.206		34.4726	32.7984	33.1103	32.6855	34.1194		31.0043		32.3453	32.8878	33.013	0	32.206	0	34.4726	32.7984	33.1103	32.6855	34.1194	0	31.0043	0	32.3453	1.25834e-08	1.15371e-08		2.01852e-08		4.19479e-09	1.33873e-08	1.07845e-08	1.44767e-08	5.35843e-09		4.64263e-08		1.83274e-08	1.196	0.7062	NaN	NaN	1.425	NaN	0.8736
HSA-MIR-532-5P	32.8917	32.6425	31.9816	32.4626	31.9713	31.6279	31.7962	32.5835	33.0913	32.7717		30.9484	30.7749	32.276	32.8917	32.6425	31.9816	32.4626	31.9713	31.6279	31.7962	32.5835	33.0913	32.7717	0	30.9484	30.7749	32.276	1.25494e-08	1.49155e-08	2.35814e-08	1.68963e-08	2.37507e-08	3.01346e-08	2.68161e-08	1.5538e-08	1.09277e-08	1.36371e-08		4.82608e-08	5.44281e-08	1.92286e-08	0.8109	1.222	1.102	NaN	1.253	0.8094	1.19
HSA-MIR-622	32.9184	0						34.8945				32.6622		33.7689	-2.58028	0	0	0	0	0	0	-4.55641	0	0	0	-2.32408	0	-3.43082															2.281	NaN	NaN	NaN	NaN	NaN	NaN
HSA-MIR-3653	32.9313	0		30.3824	28.1141	27.6044	31.2433	29.6516	30.4811		30.1065	33.4401	29.5713	30.7037	-0.856506	0	0	1.69239	3.96072	4.47043	0.831506	2.42321	1.59369	0	1.9683	-1.3653	2.50349	1.37107				30.9415	6.42252	4.51095	56.1942	18.6441	33.1324		25.5555		17.635	38.6606	0.2595	NaN	0.8352	1.445	NaN	3.858	0.5743
HSA-MIR-185*	32.9352	29.5855	29.5856	30.2383	29.7348		30.765	30.1999		29.0529	30.1062	30.1207	29.8705	29.2043	32.9352	29.5855	29.5856	30.2383	29.7348	0	30.765	30.1999	0	29.0529	30.1062	30.1207	29.8705	29.2043	1.21766e-08	1.24133e-07	1.24119e-07	7.89545e-08	1.11927e-07		5.48036e-08	8.10814e-08		1.7956e-07	8.65246e-08	8.56588e-08	1.01877e-07	1.61671e-07	0.1986	4.063	0.5208	1.109	2.632	0.9628	0.6139
HSA-MIR-3655	32.9475	34.5395	32.5876		30.4554	28.9241	32.6359	34.2731	33.1412	33.0519	30.6868	32.5295	31.3956	30.286	32.9475	34.5395	32.5876	0	30.4554	28.9241	32.6359	34.2731	33.1412	33.0519	30.6868	32.5295	31.3956	30.286	1.20731e-08	4.00473e-09	1.54933e-08		6.79226e-08	1.96325e-07	1.49833e-08	4.81685e-09	1.05558e-08	1.12304e-08	5.7855e-08	1.61308e-08	3.53976e-08	7.6384e-08	0.7869	1.015	0.7232	2.963	0.3393	2.335	0.6708
HSA-MIR-625	33.0066	34.1157	34.1827	32.5151	33.2648	32.0466	32.124	31.9539	34.6518		33.742	31.9222	33.5248	31.1657	33.0066	34.1157	34.1827	32.5151	33.2648	32.0466	32.124	31.9539	34.6518	0	33.742	31.9222	33.5248	31.1657	1.15883e-08	5.37204e-09	5.12844e-09	1.62921e-08	9.68941e-09	2.25438e-08	2.13655e-08	2.40384e-08	3.70486e-09		6.96054e-09	2.45736e-08	8.09162e-09	4.15124e-08	1.362	NaN	0.2981	0.6427	0.8206	0.6005	1.724
HSA-MIR-548C-3P	33.0377	33.2518	34.4502	34.4316		32.9087	34.9382	33.2956	33.4141	32.1271		34.5324	33.9736	33.9855	-0.508315	-0.72241	-1.92084	-1.90221	0	-0.37935	-2.40884	-0.76626	-0.88474	0.40225	0	-2.00299	-1.44421	-1.45612										75.6677					2.096	5.466	0.3434	NaN	2.349	NaN	0.3856
HSA-MIR-598	33.0672	31.8056	31.6513	30.6953	33.9885	31.3376	30.8838	30.0141	30.7661		33.1117	30.6949	29.7044	29.413	33.0672	31.8056	31.6513	30.6953	33.9885	31.3376	30.8838	30.0141	30.7661	0	33.1117	30.6949	29.7044	29.413	1.11118e-08	2.66413e-08	2.96492e-08	5.75151e-08	5.86751e-09	3.68504e-08	5.04719e-08	9.22271e-08	5.4763e-08		1.07741e-08	5.75342e-08	1.14314e-07	1.399e-07	0.4243	NaN	1.368	0.3233	1.322	0.1182	1.324
HSA-MIR-200A*	33.095	33.7541		32.7564	29.899	30.8464	30.4646	33.6662	31.3507	32.1989	31.5327		31.8993		33.095	33.7541	0	32.7564	29.899	30.8464	30.4646	33.6662	31.3507	32.1989	31.5327	0	31.8993	0	1.08999e-08	6.90261e-09		1.37826e-08	9.98824e-08	5.17989e-08	6.74922e-08	7.33582e-09	3.65186e-08	2.02843e-08	3.21886e-08		2.49661e-08		0.5992	1.547	0.4302	1.39	0.4932	2.896	2.548
HSA-MIR-101*	33.1107	33.6449	34.6693	31.1316	31.0943	34.6662	32.7172	31.8616		31.8478	30.2482	30.4826	32.8076		33.1107	33.6449	34.6693	31.1316	31.0943	34.6662	32.7172	31.8616	0	31.8478	30.2482	30.4826	32.8076	0	1.07817e-08	7.44519e-09	3.66024e-09	4.25073e-08	4.36197e-08	3.66791e-09	1.41627e-08	2.56271e-08		2.58729e-08	7.84129e-08	6.66531e-08	1.33027e-08		0.8403	2.797	0.325	4.802	0.7543	1.793	0.7581
HSA-MIR-942	33.1407	29.6593	29.5014	31.6857	33.9527	30.8254	31.4844	34.4197		31.8796	28.5343	29.6203	29.6955		33.1407	29.6593	29.5014	31.6857	33.9527	30.8254	31.4844	34.4197	0	31.8796	28.5343	29.6203	29.6955	0	1.05597e-08	1.17943e-07	1.31578e-07	2.89508e-08	6.0146e-09	5.25577e-08	3.32857e-08	4.35158e-09		2.53102e-08	2.57232e-07	1.21168e-07	1.15016e-07		0.3691	1.227	1.26	7.065	5.359	0.1109	0.7991
HSA-MIR-210	33.1773	32.4191	32.8799		32.7377	31.1758	32.2216	31.8649	33.5607	32.064	32.6147	30.8564	31.2605		33.1773	32.4191	32.8799	0	32.7377	31.1758	32.2216	31.8649	33.5607	32.064	32.6147	30.8564	31.2605	0	1.02956e-08	1.74135e-08	1.26525e-08		1.39628e-08	4.1225e-08	1.99672e-08	2.55682e-08	7.89248e-09	2.22734e-08	1.52052e-08	5.14397e-08	3.88723e-08		0.7175	2.153	0.8492	0.8326	1.577	0.5132	0.9557
HSA-MIR-219-2-3P	33.1833	0				33.1979	33.7965	33.3673		32.8982		34.5363	34.6838		33.1833	0	0	0	0	33.1979	33.7965	33.3673	0	32.8982	0	34.5363	34.6838	0	1.02528e-08					1.0149e-08	6.70259e-09	9.02508e-09		1.24924e-08		4.01358e-09	3.62351e-09		2.268	3.833	0.2512	NaN	NaN	NaN	1.018
HSA-MIR-4287	33.2017	0									34.0687				33.2017	0	0	0	0	0	0	0	0	0	34.0687	0	0	0	1.01223e-08										5.5502e-09				1.524	NaN	NaN	0.6564	NaN	NaN	NaN
HSA-MIR-3123	33.2178	34.3231	32.3302		34.1004	32.5361	32.8027	33.3545	33.2416	32.7685	33.2784	32.6478	31.0981	31.3063	-1.13362	-2.23888	-0.24606	0	-2.01622	-0.45195	-0.71854	-1.27035	-1.15738	-0.68427	-1.1942	-0.56366	0.98607	0.77789													50.4851	58.3219	1.086	2.057	1.479	0.8181	0.656	0.3106	0.9943
HSA-MIR-580	33.2489	32.8261		34.498			33.4354		31.9127					32.4723	0.130465	0.553294	0	-1.1186	0	0	-0.056	0	1.46667	0	0	0	0	0.90702	91.3537	68.1463							36.1816					53.3285	0.8948	NaN	NaN	NaN	1.559	NaN	0.5401
HSA-MIR-3665	33.2507	30.9392	31.2824	31.5773		31.8781	30.7732	30.8008			31.8883			28.4057	33.2507	30.9392	31.2824	31.5773	0	31.8781	30.7732	30.8008	0	0	31.8883	0	0	28.4057	9.78487e-09	4.85698e-08	3.82872e-08	3.1209e-08		2.5336e-08	5.44938e-08	5.34608e-08			2.51567e-08			2.81209e-07	0.3348	NaN	NaN	0.6763	2.16	NaN	1.28
HSA-MIR-517C	33.2556	31.0284	29.7471	31.3085	32.5469	31.011	32.6162		31.8097	33.5583	31.7309	34.6429	31.6478	32.1043	-2.55688	-0.329763	0.951563	-0.609827	-1.84823	-0.312337	-1.91749	0	-1.11101	-2.85965	-1.03221	-3.94418	-0.949077	-1.40561			51.7072												0.5864	0.6594	0.5602	1.326	3.569	0.5054	0.6273
HSA-MIR-515-3P	33.2871	30.163	30.452	29.8706	31.9016	30.402	30.8597			29.9465	31.5814	30.3169		30.3343	-1.26883	1.85519	1.56625	2.14761	0.116678	1.61623	1.15853	0	0	2.07177	0.436878	1.70131	0	1.68396		27.6396	33.7685	22.5686	92.2309	32.6187	44.7969			23.7868	73.8731	30.7507		31.1228	0.2385	3.352	NaN	0.6113	2.703	0.3286	0.8812
HSA-MIR-7-1*	33.3474	0	32.7569	30.2735	28.9722	30.4583	32.2755	29.3473	34.6303		32.3786	30.5055	34.5091	29.532	33.3474	0	32.7569	30.2735	28.9722	30.4583	32.2755	29.3473	34.6303	0	32.3786	30.5055	34.5091	29.532	9.1504e-09		1.37785e-08	7.70514e-08	1.89885e-07	6.77848e-08	1.92362e-08	1.46409e-07	3.76033e-09		1.79093e-08	6.56025e-08	4.08991e-09	1.2882e-07	0.4418	NaN	0.0619	0.6794	NaN	4.835	0.6379
HSA-MIR-182*	33.3541	0	32.6763	34.6865	32.5467	31.553			32.5575	30.502	31.8928	34.1537	33.372	30.8216	33.3541	0	32.6763	34.6865	32.5467	31.553	0	0	32.5575	30.502	31.8928	34.1537	33.372	30.8216	9.10813e-09		1.45698e-08	3.61691e-09	1.59389e-08	3.17402e-08			1.58198e-08	6.5765e-08	2.5079e-08	5.23257e-09	8.99578e-09	5.26959e-08	0.7951	7.964	0.2461	1.72	NaN	0.7338	NaN
HSA-MIR-181A-2*	33.3567	0		32.2396		33.9508	31.1247			30.141	33.0492	34.5682	31.4792		33.3567	0	0	32.2396	0	33.9508	31.1247	0	0	30.141	33.0492	34.5682	31.4792	0	9.09169e-09			1.97208e-08		6.02253e-09	4.27099e-08			8.44602e-08	1.12515e-08	3.92575e-09	3.34059e-08		NaN	0.8978	0.3163	1.811	NaN	NaN	NaN
HSA-MIR-1225-3P	33.3672	0	29.5052	34.5831			29.7617	30.1914	31.6321	30.3623	31.8839	29.9129		30.467	33.3672	0	29.5052	34.5831	0	0	29.7617	30.1914	31.6321	30.3623	31.8839	29.9129	0	30.467	9.02539e-09		1.31236e-07	3.88552e-09			1.09856e-07	8.15605e-08	3.0047e-08	7.24513e-08	2.52347e-08	9.89281e-08		6.73791e-08	0.2533	2.82	NaN	0.5564	NaN	NaN	2.117
HSA-MIR-548C-5P	33.4409	0		30.2684	32.4838	31.6612	31.1358	29.4443			30.2062	31.1889	32.9699		33.4409	0	0	30.2684	32.4838	31.6612	31.1358	29.4443	0	0	30.2062	31.1889	32.9699	0	8.57601e-09			7.7321e-08	1.66495e-08	2.94462e-08	4.23817e-08	1.36891e-07			8.07287e-08	4.08524e-08	1.18871e-08		0.4056	NaN	0.1762	3	NaN	0.4153	1.377
HSA-MIR-146B-5P	33.4519	29.5296	29.5895	29.4492	26.8348	26.4711	29.7834	28.0958	29.982		30.0631	30.4603	27.0717	28.0877	-1.98972	1.93258	1.8726	2.01295	4.6273	4.99109	1.67872	3.36639	1.48012	0	1.39907	1.00186	4.39042	3.37443		26.196	27.3081	24.7766	4.04617	3.14436	31.236	9.69652	35.8459		37.9174	49.9356	4.76818	9.64264	0.07201	NaN	1.88	0.5927	1.419	3.728	0.6289
HSA-MIR-124*	33.468	33.7214	32.697	30.5134				32.5232			31.3757		30.8337		33.468	33.7214	32.697	30.5134	0	0	0	32.5232	0	0	31.3757	0	30.8337	0	8.41626e-09	7.06069e-09	1.43623e-08	6.52443e-08				1.62005e-08			3.5891e-08		5.22551e-08		0.5326	NaN	1.037	1.785	0.5808	NaN	NaN
HSA-MIR-196A*	33.5891	33.2316	33.5334	33.9935		31.6641	32.566		34.0424	33.6009	32.1212		30.8056	29.9441	-2.52992	-2.17244	-2.47426	-2.9344	0	-0.605003	-1.50689	0	-2.98321	-2.5418	-1.062	0	0.253567	1.11508													83.882	46.1667	0.6644	0.9141	1.434	1.444	1.106	NaN	0.9273
HSA-MIR-4290	33.5917	30.6495	29.7737	33.6916	32.1195		32.5569	31.6549	34.9422	28.3898	30.2535	28.8674			33.5917	30.6495	29.7737	33.6916	32.1195	0	32.5569	31.6549	34.9422	28.3898	30.2535	28.8674	0	0	7.72491e-09	5.93718e-08	1.08952e-07	7.20805e-09	2.14328e-08		1.58271e-08	2.95744e-08	3.02941e-09	2.84331e-07	7.81275e-08	2.042e-07			0.2645	13.51	NaN	2.102	2.643	0.3871	0.3723
HSA-MIR-504	33.6053	32.0552	31.9155		30.6135			32.9156	32.0445	29.9953	31.2741			31.1563	-3.1971	-1.64692	-1.50722	0	-0.205221	0	0	-2.5073	-1.63622	0.412979	-0.865871	0	0	-0.748051										75.1071					0.3155	5.344	NaN	1.248	1.201	1.324	NaN
HSA-LET-7F-2*	33.6645	30.8901	30.4977	30.0454	30.4161	29.3934	30.044	29.9277	31.5841	33.5735	32.4922	31.09	29.8427	29.8946	33.6645	30.8901	30.4977	30.0454	30.4161	29.3934	30.044	29.9277	31.5841	33.5735	32.4922	31.09	29.8427	29.8946	7.34478e-09	5.02512e-08	6.59577e-08	9.0249e-08	6.97992e-08	1.41807e-07	9.03335e-08	9.79205e-08	3.10622e-08	7.82282e-09	1.65532e-08	4.37512e-08	1.03862e-07	1.00188e-07	0.2076	0.3067	0.92	0.3676	1.846	1.04	1.753
HSA-MIR-20B*	33.6991	29.312	32.5447			33.3791		34.1221	31.7271	30.8766	29.9039	29.7777	31.3157	29.5681	-0.658493	3.7286	0.495944	0	0	-0.338456	0	-1.08147	1.31354	2.16402	3.13668	3.26289	1.72494	3.47256		7.54364	70.9097						40.2331	22.3133	11.3701	10.4177	30.251	9.00853	0.2916	2.861	0.4768	3.18	7.93	NaN	NaN
HSA-MIR-744*	33.7286	31.2637	30.3978		30.6152					31.9021					-3.61388	-1.14904	-0.283108	0	-0.500518	0	0	0	0	-1.78737	0	0	0	0															0.2422	1.191	NaN	NaN	1.738	1.105	NaN
HSA-MIR-301A	33.7436	32.2336	31.5278		30.5761	30.5006	32.2274	30.6876		31.4181	32.1516	30.68	30.6661	30.8054	-0.793518	0.716506	1.42229	0	2.37392	2.44951	0.722706	2.2625	0	1.53193	0.798476	2.27011	2.28394	2.1447		60.857	37.3121		19.2921	18.3073	60.596	20.8411		34.5815	57.4956	20.7315	20.5337	22.6143	0.303	2.107	0.8018	0.7178	1.122	1.436	0.5953
HSA-MIR-891A	33.8083	0	30.937	32.1003	30.9022	31.1088					34.9229		31.2757	30.7583	33.8083	0	30.937	32.1003	30.9022	31.1088	0	0	0	0	34.9229	0	31.2757	30.7583	6.64788e-09		4.8644e-08	2.17198e-08	4.98326e-08	4.31829e-08					3.07021e-09		3.84665e-08	5.50576e-08	0.4643	NaN	0.8421	0.1685	NaN	1.835	NaN
HSA-MIR-3660	33.8187	0	32.2497							31.8646		34.6699			33.8187	0	32.2497	0	0	0	0	0	0	31.8646	0	34.6699	0	0	6.60033e-09		1.95834e-08							2.55739e-08		3.65864e-09			0.6794	3.652	NaN	NaN	NaN	NaN	NaN
HSA-MIR-3121	33.8359	0								33.5216			32.4575		33.8359	0	0	0	0	0	0	0	0	33.5216	0	0	32.4575	0	6.5221e-09									8.10942e-09			1.69554e-08		0.8927	1.54	0.7275	NaN	NaN	NaN	NaN
HSA-MIR-593	33.8367	30.3973	32.1142	30.2319		31.6498		33.8401			30.4754	31.1318	32.5605	33.3854	33.8367	30.3973	32.1142	30.2319	0	31.6498	0	33.8401	0	0	30.4754	31.1318	32.5605	33.3854	6.51827e-09	7.0713e-08	2.15118e-08	7.93039e-08		2.96806e-08		6.50297e-09			6.69875e-08	4.25002e-08	1.57875e-08	8.91262e-09	0.4095	NaN	0.3109	3.307	5.774	NaN	NaN
HSA-MIR-1227	33.8424	33.5693	30.7132		32.2439		32.2551				30.3095	32.4686	30.7307	33.4629	33.8424	33.5693	30.7132	0	32.2439	0	32.2551	0	0	0	30.3095	32.4686	30.7307	33.4629	6.49284e-09	7.846e-09	5.68091e-08		1.96617e-08		1.95093e-08				7.51488e-08	1.68263e-08	5.61237e-08	8.44612e-09	0.4579	NaN	1.241	4.164	0.7192	0.7313	0.945
HSA-MIR-3126-3P	33.8814	34.2919	30.9122		34.8204	32.9493	33.1441	33.3468		30.7669	32.4732		30.4626	33.714	33.8814	34.2919	30.9122	0	34.8204	32.9493	33.1441	33.3468	0	30.7669	32.4732	0	30.4626	33.714	6.31957e-09	4.75442e-09	4.94867e-08		3.29617e-09	1.20578e-08	1.05351e-08	9.15398e-09		5.47311e-08	1.67728e-08		6.75854e-08	7.0969e-09	0.7126	8.561	2.389	1.486	0.6969	0.196	0.8159
HSA-MIR-3144-5P	33.8937	0													33.8937	0	0	0	0	0	0	0	0	0	0	0	0	0	6.26583e-09														1	NaN	NaN	NaN	NaN	NaN	NaN
HSA-MIR-488	33.8954	0										32.611			33.8954	0	0	0	0	0	0	0	0	0	0	32.611	0	0	6.25836e-09											1.52444e-08			0.7569	NaN	NaN	NaN	NaN	NaN	NaN
HSA-MIR-3669	33.9935	32.8175	34.5897	32.699			33.9414			33.8482	30.5033		30.8174		-0.607902	0.568078	-1.20412	0.68658	0	0	-0.55581	0	0	-0.46259	2.88231	0	2.56822	0		67.4515		62.1325							13.5625		16.8612		0.5561	0.8532	1.576	4.91	1.633	NaN	0.396
HSA-MIR-769-5P	33.9989	33.5025	31.9506		33.3419	32.5361		32.7689		33.1336			34.2789		-1.69996	-1.20356	0.348393	0	-1.04296	-0.237077	0	-0.469967	0	-0.834607	0	0	-1.9799	0			78.5458												0.8678	2.193	0.224	NaN	1.591	0.7217	NaN
HSA-MIR-1295	34.0282	30.352	28.7522	32.4108	32.2905	31.9747	31.9584	34.3284	29.8194	30.0023	33.2994	31.1083	31.5025	30.2501	-4.01117	-0.334965	1.26488	-2.39375	-2.27344	-1.95769	-1.94133	-4.31131	0.197654	0.0147141	-3.2824	-1.09123	-1.48551	-0.233046			41.6133						87.1967	98.9853					0.2484	5.613	0.4484	0.3235	4.128	0.4369	0.7163
HSA-MIR-362-5P	34.1617	0	32.7244	32.8073			34.7794						30.2162	30.2148	34.1617	0	32.7244	32.8073	0	0	34.7794	0	0	0	0	0	30.2162	30.2148	5.2037e-09		1.40924e-08	1.33047e-08			3.39118e-09						8.01705e-08	8.02472e-08	0.4571	NaN	2.208	NaN	NaN	NaN	0.2046
HSA-MIR-3154	34.1681	30.4845	30.6978		32.5448	31.4844	33.9391	31.2652			30.4663		32.5126	30.0093	34.1681	30.4845	30.6978	0	32.5448	31.4844	33.9391	31.2652	0	0	30.4663	0	32.5126	30.0093	5.18056e-09	6.65649e-08	5.74179e-08		1.59597e-08	3.3284e-08	6.07153e-09	3.87469e-08			6.74118e-08		1.63201e-08	9.25332e-08	0.3061	NaN	0.3022	3.129	5.112	0.4973	0.2464
HSA-MIR-548X	34.2254	0											32.472		34.2254	0	0	0	0	0	0	0	0	0	0	0	32.472	0	4.9788e-09												1.67858e-08		0.9728	NaN	1.028	NaN	NaN	NaN	NaN
HSA-MIR-138-1*	34.2517	33.3165		33.167	31.4909	32.8011	32.9654	31.8624				32.2349	29.3331	33.0795	34.2517	33.3165	0	33.167	31.4909	32.8011	32.9654	31.8624	0	0	0	32.2349	29.3331	33.0795	4.88896e-09	9.3481e-09		1.03692e-08	3.31358e-08	1.33627e-08	1.19244e-08	2.56122e-08				1.97841e-08	1.47861e-07	1.10175e-08	0.4517	NaN	4.282	NaN	1.123	1.614	0.7566
HSA-MIR-509-3-5P	34.2524	33.8702					34.2371	32.2605	34.5951				30.3859		34.2524	33.8702	0	0	0	0	34.2371	32.2605	34.5951	0	0	0	30.3859	0	4.88648e-09	6.36857e-09					4.93869e-09	1.94363e-08	3.85342e-09				7.12738e-08		0.6405	NaN	2.928	NaN	1.085	NaN	0.4446
HSA-MIR-671-3P	34.2647	0	30.9816		31.3627	31.115		31.9127		33.3798				30.1782	34.2647	0	30.9816	0	31.3627	31.115	0	31.9127	0	33.3798	0	0	0	30.1782	4.84491e-09		4.71645e-08		3.62143e-08	4.29971e-08		2.47351e-08		8.94716e-09				8.23079e-08	0.2962	0.7588	NaN	NaN	NaN	1.168	NaN
HSA-MIR-330-3P	34.3194	0		31.654	32.2102	30.5795	32.5307	29.9613		31.9431	32.1086	33.3345		29.0512	34.3194	0	0	31.654	32.2102	30.5795	32.5307	29.9613	0	31.9431	32.1086	33.3345	0	29.0512	4.66488e-09			2.95943e-08	2.01257e-08	6.2325e-08	1.61172e-08	9.5665e-08		2.42195e-08	2.15943e-08	9.23261e-09		1.79768e-07	0.2436	1.755	NaN	0.8861	NaN	0.5543	0.5781
HSA-MIR-517*	34.3432	33.1185									34.5274		32.2444		34.3432	33.1185	0	0	0	0	0	0	0	0	34.5274	0	32.2444	0	4.58858e-09	1.07237e-08									4.0385e-09		1.96548e-08		0.7716	NaN	1.036	0.5336	2.344	NaN	NaN
HSA-MIR-1270	34.3503	0				33.1179						32.7465			34.3503	0	0	0	0	33.1179	0	0	0	0	0	32.7465	0	0	4.56584e-09					1.07281e-08						1.38774e-08			0.8752	NaN	NaN	NaN	NaN	NaN	NaN
HSA-MIR-190	34.3639	34.5045	30.7681	30.7309	32.3332	30.6327	31.982	31.5466	30.9095	31.7699	30.1805		28.4032	31.8412	34.3639	34.5045	30.7681	30.7309	32.3332	30.6327	31.982	31.5466	30.9095	31.7699	30.1805	0	28.4032	31.8412	4.52302e-09	4.1032e-09	5.46864e-08	5.6116e-08	1.84816e-08	6.00661e-08	2.35747e-08	3.18815e-08	4.95804e-08	2.73097e-08	8.21813e-08		2.81693e-07	2.59928e-08	0.1909	1.599	3.727	2.726	0.2251	0.4114	0.6835
HSA-MIR-1306	34.4086	33.7298		34.5184		33.7059	31.3053	31.7493				31.6708	30.368	33.7067	34.4086	33.7298	0	34.5184	0	33.7059	31.3053	31.7493	0	0	0	31.6708	30.368	33.7067	4.38498e-09	7.01971e-09		4.06369e-09		7.13711e-09	3.76853e-08	2.77022e-08				2.92503e-08	7.21651e-08	7.13295e-09	0.5042	NaN	2.601	NaN	1.049	NaN	2.976
HSA-MIR-3065-5P	34.4151	33.6568		29.8947		31.6852	31.4508	32.9519	30.5253		32.7156		31.6548	29.0129	-2.25033	-1.49207	0	2.27011	0	0.47958	0.71394	-0.78714	1.63951	0	-0.55079	0	0.50997	3.1519				20.7314		71.7186	60.9653		32.0965				70.2237	11.2508	0.2275	NaN	0.4831	0.5805	0.5001	NaN	1.219
HSA-MIR-216B	34.4154	0	33.8894	34.1668	32.898	29.6953		33.2282	33.3205		29.0801	33.5291	30.7223	31.4577	-5.1006	0	-4.57458	-4.85192	-3.5832	-0.380443	0	-3.91333	-4.00562	0	0.234677	-4.21424	-1.40743	-2.14284											84.9875				0.3726	NaN	1.511	11.82	NaN	0.5625	NaN
HSA-MIR-4267	34.416	0	33.3847	31.9002	31.9279		31.3918		34.2382	29.4392			31.7528		34.416	0	33.3847	31.9002	31.9279	0	31.3918	0	34.2382	29.4392	0	0	31.7528	0	4.3628e-09		8.91639e-09	2.49511e-08	2.44757e-08		3.54909e-08		4.93493e-09	1.37382e-07			2.76341e-08		0.2816	12.3	0.5592	NaN	NaN	0.8333	1.574
HSA-MIR-187	34.5343	32.5662	31.3618	31.8455	31.3506	31.2532	33.0436		32.3505	31.113	32.6458		30.831	31.1553	34.5343	32.5662	31.3618	31.8455	31.3506	31.2532	33.0436	0	32.3505	31.113	32.6458	0	30.831	31.1553	4.01924e-09	1.57253e-08	3.62379e-08	2.59142e-08	3.65201e-08	3.90711e-08	1.12951e-08		1.82609e-08	4.30595e-08	1.48807e-08		5.2354e-08	4.18127e-08	0.2287	3.4	0.934	0.6654	1.163	1.096	0.4415
HSA-MIR-935	34.5374	0					30.9693					33.4656	30.8287		34.5374	0	0	0	0	0	30.9693	0	0	0	0	33.4656	30.8287	0	4.0105e-09						4.7569e-08					8.43045e-09	5.24376e-08		0.3755	NaN	1.539	NaN	NaN	NaN	3.059
HSA-LET-7F-1*	34.5883	31.9863	30.4345	28.9615	30.2489	31.8821	29.8888	31.2898		34.9255	30.88	33.0719	33.7863	33.425	34.5883	31.9863	30.4345	28.9615	30.2489	31.8821	29.8888	31.2898	0	34.9255	30.88	33.0719	33.7863	33.425	3.87144e-09	2.35057e-08	6.89128e-08	1.91302e-07	7.83754e-08	2.52664e-08	1.00594e-07	3.80926e-08		3.06454e-09	5.0605e-08	1.10755e-08	6.74987e-09	8.67106e-09	0.2317	0.2545	0.1266	2.38	1.829	2.474	4.135
HSA-MIR-1205	34.6438	0	32.2972		32.6082	31.3579	34.0709		30.9376	29.7198	33.5201	31.2096	32.7671	32.4576	34.6438	0	32.2972	0	32.6082	31.3579	34.0709	0	30.9376	29.7198	33.5201	31.2096	32.7671	32.4576	3.72538e-09		1.89483e-08		1.5274e-08	3.63363e-08	5.54174e-09		4.86254e-08	1.13097e-07	8.11808e-09	4.02704e-08	1.36809e-08	1.69543e-08	0.2903	12.22	0.3341	0.497	NaN	0.6276	0.2965
HSA-MIR-632	34.649	30.7142	28.9317	33.6067	29.5048	30.3117	31.3538	31.5378		30.0385	29.823		31.3748	33.3865	34.649	30.7142	28.9317	33.6067	29.5048	30.3117	31.3538	31.5378	0	30.0385	29.823	0	31.3748	33.3865	3.71208e-09	5.67677e-08	1.95292e-07	7.64475e-09	1.31276e-07	7.50375e-08	3.64387e-08	3.20764e-08		9.06823e-08	1.05285e-07		3.59129e-08	8.90533e-09	0.1282	4.346	0.3889	2.858	2.549	2.392	0.8646
HSA-MIR-135A*	34.6564	32.7604								31.7298			32.0047		34.6564	32.7604	0	0	0	0	0	0	0	31.7298	0	0	32.0047	0	3.69299e-09	1.37444e-08								2.80794e-08			2.32075e-08		0.3158	3.331	0.6221	NaN	1.528	NaN	NaN
HSA-MIR-3170	34.7573	0			30.4588	30.9418	32.7176	31.8118	30.4249	30.6044		32.0196	33.4672	32.9511	34.7573	0	0	0	30.4588	30.9418	32.7176	31.8118	30.4249	30.6044	0	32.0196	33.4672	32.9511	3.44358e-09				6.77632e-08	4.84821e-08	1.41584e-08	2.65279e-08	6.93728e-08	6.12573e-08		2.29697e-08	8.42099e-09	1.20426e-08	0.2261	5.579	0.1733	NaN	NaN	2.346	0.6384
HSA-MIR-615-3P	34.7677	0	34.2986	31.582		28.9888	33.0409	32.5743		31.6745	29.9738	31.0716	33.8114	31.4771	-5.44617	0	-4.97712	-2.26057	0	0.332654	-3.71944	-3.25282	0	-2.35307	-0.652366	-1.75012	-4.48991	-2.15558						79.4075									0.2366	2.801	0.1439	5.157	NaN	NaN	0.5379
HSA-MIR-212	34.7857	0			31.9162	30.4726	31.2381			30.5633		32.8122	33.9415	31.7188	-5.75336	0	0	0	-2.88394	-1.4403	-2.20576	0	0	-1.53101	0	-3.77987	-4.90916	-2.68648															0.2705	7.005	0.1522	NaN	NaN	1.043	2.173
HSA-MIR-4303	34.8516	0				31.103		33.7143		33.2693	31.6869	31.0409	31.5222	32.9634	34.8516	0	0	0	0	31.103	0	33.7143	0	33.2693	31.6869	31.0409	31.5222	32.9634	3.22575e-09					4.33584e-08		7.09557e-09		9.65897e-09	2.89255e-08	4.52655e-08	3.24251e-08	1.19409e-08	0.3202	1.33	1.009	2.256	NaN	NaN	NaN
HSA-MIR-518C*	34.869	0		33.1876				34.7422			31.8173		29.6711	29.1942	34.869	0	0	33.1876	0	0	0	34.7422	0	0	31.8173	0	29.6711	29.1942	3.18698e-09			1.02224e-08				3.47986e-09			2.64273e-08		1.16976e-07	1.62808e-07	0.2448	NaN	2.816	1.595	NaN	NaN	NaN
HSA-MIR-1238	34.8953	30.1942	27.8309			31.0405			34.9495	28.4842	29.932	30.401		29.1858	-5.97603	-1.27487	1.08842	0	0	-2.1212	0	0	-6.03017	0.43508	-1.0127	-1.48165	0	-0.26646			47.0276							73.9653					0.06855	8.092	NaN	1.68	2.318	NaN	NaN
HSA-MIR-29B-1*	34.9053	34.6995	34.2238	31.8609		31.4578	30.4085	31.513		33.3125	29.7738	33.5476	31.6562		34.9053	34.6995	34.2238	31.8609	0	31.4578	30.4085	31.513	0	33.3125	29.7738	33.5476	31.6562	0	3.10782e-09	3.58429e-09	4.9845e-09	2.56388e-08		3.39041e-08	7.01655e-08	3.2633e-08		9.37455e-09	1.08939e-07	7.96447e-09	2.95484e-08		0.2582	1.08	0.7695	7.111	0.3871	NaN	4.004
HSA-MIR-520G	34.9093	34.7873	30.2599				30.4706			31.8162		31.9294		30.3116	-4.02996	-3.90798	0.619383	0	0	0	0.408703	0	0	-0.936887	0	-1.05007	0	0.567743			65.0949				75.33							67.4671	0.1608	1.904	NaN	NaN	0.2275	NaN	2.396
HSA-MIR-3139	34.9729	0												31.5611	-5.22198	0	0	0	0	0	0	0	0	0	0	0	0	-1.81009															0.4075	NaN	NaN	NaN	NaN	NaN	NaN
HSA-MIR-483-5P	34.9915	33.8582	31.5346	31.7228		31.7723		33.1229			31.6183	34.0038		31.4032	34.9915	33.8582	31.5346	31.7228	0	31.7723	0	33.1229	0	0	31.6183	34.0038	0	31.4032	2.9275e-09	6.42184e-09	3.21469e-08	2.82152e-08		2.72639e-08		1.06908e-08			3.03339e-08	5.80562e-09		3.52126e-08	0.2762	NaN	NaN	2.249	0.7875	NaN	NaN
[truncated: 7 more columns]

## Sheet: Raw Cq´s
miRNA	T21 Mean	C Mean	Number identified in T21	Number identified in C	Difference	p Value	K1_T21_f	41_T21_f	42_T21_f	102_T21_m	109_T21_f	107_T21_m	108_T21_m	21_C_m	61_C_f	74_C_f	84_C_f	72_C_f	68_C_m	87_C_m
HSA-MIR-589*	31.4	33.86	2	2	-2.46	0.0028299	31.47	NA	NA	NA	NA	NA	31.33	NA	NA	NA	NA	33.77	33.95	NA
HSA-MIR-512-5P	30.7033	33.35	3	5	-2.64667	0.00346609	31.15	NA	30.33	NA	30.63	NA	NA	NA	33.83	33.94	33.1	34.31	NA	31.57
HSA-MIR-181A*	33.2425	30.11	4	2	3.1325	0.010475	NA	NA	NA	33.67	31.83	33.02	34.45	NA	NA	30.17	NA	30.05	NA	NA
HSA-MIR-483-5P	31.5675	33.548	4	5	-1.9805	0.020202	31.53	31.72	NA	NA	31.62	NA	31.4	34.99	33.86	31.77	NA	33.12	NA	34
HSA-MIR-362-5P	31.49	34.47	4	2	-2.98	0.0222436	32.72	32.81	NA	NA	NA	30.22	30.21	34.16	NA	NA	34.78	NA	NA	NA
HSA-MIR-518C*	30.9675	34.805	4	2	-3.8375	0.0259279	NA	33.19	NA	NA	31.82	29.67	29.19	34.87	NA	NA	NA	34.74	NA	NA
HSA-MIR-3667-5P	30.69	33.21	2	3	-2.52	0.0259642	NA	NA	30.32	NA	NA	31.06	NA	NA	NA	NA	NA	33.81	32.9	32.92
HSA-MIR-195*	29.04	30.3867	5	6	-1.34667	0.026261	NA	NA	29.38	28.6	28.83	28.43	29.96	29.89	NA	29.71	29.96	31.01	32.18	29.57
HSA-MIR-124*	31.355	33.2367	4	3	-1.88167	0.0268457	32.7	30.51	NA	NA	31.38	30.83	NA	33.47	33.72	NA	NA	32.52	NA	NA
HSA-MIR-498	33.85	31.5375	3	4	2.3125	0.0388395	32.77	NA	NA	NA	NA	34.1	34.68	NA	31.75	NA	31.84	NA	30.83	31.73
HSA-MIR-18B*	30.705	33.295	4	4	-2.59	0.0407798	NA	30.83	NA	31.6	30.66	29.73	NA	NA	31.24	34.73	NA	NA	32.78	34.43
HSA-MIR-888*	30.55	34.1267	2	3	-3.57667	0.0453163	30.1	NA	NA	31	NA	NA	NA	NA	NA	34.42	NA	33.76	NA	34.2
HSA-MIR-1249	26.715	29.1967	2	6	-2.48167	0.0458654	26.5	NA	NA	NA	NA	26.93	NA	32.21	28.13	27.64	NA	27.14	32.06	28
HSA-MIR-3676	33.1933	31.2767	3	3	1.91667	0.0476759	34	32.49	NA	NA	NA	NA	33.09	NA	31.22	NA	31.35	31.26	NA	NA
RNU12	27.9517	29.174	6	5	-1.22233	0.0563816	NA	28.05	27.51	28.87	29.24	26.45	27.59	NA	30.13	28.78	NA	29.4	29.62	27.94
HSA-MIR-215	30.145	31.1133	2	3	-0.968333	0.0566498	30.05	30.24	NA	NA	NA	NA	NA	NA	NA	31.28	30.59	31.47	NA	NA
HSA-MIR-623	33.6867	31.7833	6	3	1.90333	0.0611529	33.43	NA	33.68	34.93	33.33	33.45	33.3	30.64	NA	NA	NA	32.46	NA	32.25
HSA-MIR-1227	31.49	33.035	5	4	-1.545	0.0687192	30.71	NA	32.24	NA	30.31	30.73	33.46	33.84	33.57	NA	32.26	NA	NA	32.47
HSA-MIR-30C	26.7943	27.9486	7	7	-1.15429	0.0716226	25.73	27.96	26.82	28.06	27.09	24.87	27.03	28.61	28.95	26.52	28.2	26.56	28.89	27.91
HSA-MIR-187	31.4729	32.748	7	5	-1.27514	0.0747058	31.36	31.85	31.35	31.11	32.65	30.83	31.16	34.53	32.57	31.25	33.04	NA	32.35	NA
HSA-MIR-943	32.0683	30.8017	6	6	1.26667	0.0777273	31.57	31.03	32.16	30.85	NA	32.93	33.87	31.39	30.59	28.83	30.84	31.84	NA	31.32
HSA-MIR-558	33.34	30.795	2	2	2.545	0.0798667	33.11	NA	NA	33.57	NA	NA	NA	31.29	NA	NA	NA	NA	NA	30.3
HSA-MIR-3660	32.055	34.245	2	2	-2.19	0.0802629	32.25	NA	NA	31.86	NA	NA	NA	33.82	NA	NA	NA	NA	NA	34.67
HSA-MIR-93*	29.14	30.54	6	5	-1.4	0.0804955	27.81	29.73	28.1	NA	29.22	29	30.98	NA	NA	28.96	30.52	30.5	32.29	30.43
HSA-MIR-219-5P	31.025	33.29	2	4	-2.265	0.0850667	31.63	NA	30.42	NA	NA	NA	NA	NA	32.27	32.81	33.87	34.21	NA	NA
HSA-MIR-3197	31.606	32.964	5	5	-1.358	0.0862198	32.07	NA	32.19	30.65	32.26	30.86	NA	32	32.82	33.91	31.5	NA	NA	34.59
HSA-MIR-214	30.308	32.415	5	4	-2.107	0.0896313	29.05	31.69	NA	28.49	NA	30.13	32.18	31.61	30.66	NA	33.3	34.09	NA	NA
HSA-MIR-550A	31.5933	30.41	3	3	1.18333	0.096434	31.41	NA	31.6	31.77	NA	NA	NA	NA	NA	30.5	31.08	NA	NA	29.65
HSA-MIR-421	30.5183	31.72	6	6	-1.20167	0.0981149	31.25	30.48	30.34	30.52	29.85	30.67	NA	NA	34.52	31	30.84	30.74	31.33	31.89
HSA-MIR-200C	31.914	30.3843	5	7	1.52971	0.0999145	32.47	NA	31.85	31.93	33.87	29.45	NA	30.36	29.79	29.93	30.76	30.87	31.52	29.46
HSA-MIR-410	33.01	30.7933	5	3	2.21667	0.104213	NA	NA	32.84	34.59	33.13	31.98	32.51	NA	NA	29.94	NA	29.92	NA	32.52
HSA-MIR-182	28.9783	29.81	6	7	-0.831667	0.104378	29.36	29.7	28.32	NA	28.96	27.93	29.6	29.99	30.29	30.43	29.64	27.76	30.67	29.89
HSA-MIR-127-5P	33.1	31.9067	5	3	1.19333	0.106144	32.11	NA	NA	33.17	31.98	34.2	34.04	NA	NA	32.7	31.71	31.31	NA	NA
HSA-MIR-155	32.1167	30.976	6	5	1.14067	0.106589	34.89	31.49	31.65	NA	31.71	32.01	30.95	NA	NA	30.27	31.27	31.22	31.12	31
HSA-MIR-611	33.1817	31.63	6	4	1.55167	0.106633	33	NA	34.45	31.36	34.56	33.99	31.73	NA	33.18	NA	NA	31.58	30.14	31.62
HSA-MIR-183	30.7871	31.5886	7	7	-0.801429	0.110031	30.89	31.99	29.98	29.78	30.68	31.19	31	31.75	33.19	31.32	32.47	31.23	30.68	30.48
HSA-MIR-551A	29.9883	30.974	6	5	-0.985667	0.111662	29.98	NA	29.2	30.45	30.13	30.25	29.92	NA	30.13	30.01	30.59	32.54	NA	31.6
HSA-MIR-190	30.86	32.3217	7	6	-1.46167	0.120235	30.77	30.73	32.33	31.77	30.18	28.4	31.84	34.36	34.5	30.63	31.98	31.55	30.91	NA
HSA-MIR-324-5P	31.4233	32.17	6	6	-0.746667	0.120274	31.99	NA	30.91	31.73	31.18	31.28	31.45	NA	32.66	32.49	32.87	30.39	31.82	32.79
HSA-MIR-411	32.8333	31.7267	3	3	1.10667	0.123857	32.75	NA	32.12	33.63	NA	NA	NA	NA	NA	31.15	31.66	32.37	NA	NA
HSA-MIR-885-5P	29.9714	31.9325	7	4	-1.96107	0.124694	26.53	33.7	30.32	33	29.56	28.52	28.17	32.2	NA	NA	30.96	31.02	33.55	NA
HSA-MIR-3126-3P	32.19	33.522	6	5	-1.332	0.13344	30.91	NA	34.82	30.77	32.47	30.46	33.71	33.88	34.29	32.95	33.14	33.35	NA	NA
HSA-MIR-29A*	31.038	32.282	5	5	-1.244	0.135186	31.95	NA	31.87	29.89	31.04	NA	30.44	NA	32.23	30.35	32.17	34.24	NA	32.42
HSA-MIR-486-5P	22.1514	21.1571	7	7	0.994286	0.136172	21.19	21.44	21.55	23.8	23.62	20.09	23.37	21.45	21.86	20.51	20.43	21.27	22.14	20.44
HSA-MIR-3677	31.505	30.5733	6	3	0.931667	0.137705	30.7	NA	32.72	31.99	32.85	29.65	31.12	NA	NA	30.24	30.53	30.95	NA	NA
HSA-MIR-627	32.815	31.8157	4	7	0.999286	0.140396	33.71	NA	33.59	NA	NA	32.17	31.79	32.05	31.43	31.04	32.98	30.96	31.41	32.84
HSA-MIR-3157	32.565	31.1825	4	4	1.3825	0.142753	33.29	31.14	32.02	33.81	NA	NA	NA	30.3	31.34	NA	30.41	NA	NA	32.68
HSA-MIR-587	31.7375	33.46	4	4	-1.7225	0.143682	NA	33.01	NA	30.51	32.39	31.04	NA	NA	31.01	NA	33.98	34.44	NA	34.41
HSA-MIR-520A-5P	33.5233	32.8867	3	3	0.636667	0.148126	33.61	NA	NA	33.93	NA	33.03	NA	NA	32.56	32.75	33.35	NA	NA	NA
HSA-MIR-27B	27.5471	28.5114	7	7	-0.964286	0.148923	27.61	28.27	27.02	28.76	27.38	27.35	26.44	29.94	30.49	26.61	27.93	27.1	29.04	28.47
HSA-MIR-185*	29.6843	30.724	7	5	-1.03971	0.152289	29.59	30.24	29.73	29.05	30.11	29.87	29.2	32.94	29.59	NA	30.77	30.2	NA	30.12
HSA-MIR-887	29.4857	30.3017	7	6	-0.815952	0.152758	30.68	29.85	28.55	29.43	31.23	28.67	27.99	NA	31.44	30.49	29.94	29.38	30.21	30.35
HSA-MIR-3158	30.9625	32.6367	4	3	-1.67417	0.153118	31.25	NA	NA	31.99	31.12	29.49	NA	NA	31.32	NA	32.59	NA	NA	34
HSA-MIR-371-3P	30.288	31.7533	5	3	-1.46533	0.153216	32.02	NA	31.71	NA	28.16	30.49	29.06	NA	31.68	32.65	NA	30.93	NA	NA
HSA-MIR-3655	31.4133	32.7129	6	7	-1.29952	0.153815	32.59	NA	30.46	33.05	30.69	31.4	30.29	32.95	34.54	28.92	32.64	34.27	33.14	32.53
HSA-MIR-3198	31.7	33.018	5	5	-1.318	0.159861	NA	31.06	31.13	33.88	NA	31.42	31.01	31.02	NA	32.64	34.15	32.6	34.68	NA
HSA-MIR-93	25.3267	24.4983	6	6	0.828333	0.163192	24.98	26.01	24.97	NA	26.31	23.64	26.05	25.05	25.58	23.46	24.26	25.14	NA	23.5
HSA-MIR-181A	30.8443	31.5357	7	7	-0.691429	0.164046	30.9	30.49	31.11	31.71	31.33	29.46	30.91	31.38	33.25	30.09	32.03	30.76	31.67	31.57
HSA-MIR-145	29.5533	30.4714	6	7	-0.918095	0.167462	30.45	NA	28.85	29.78	29.07	30.22	28.95	29.58	31.55	28.12	30.25	30.02	31.36	32.42
HSA-MIR-605	33.365	32.1133	4	3	1.25167	0.169041	NA	34.05	33.77	NA	NA	33.74	31.9	32.58	NA	NA	32.8	30.96	NA	NA
HSA-MIR-181A-2*	31.7275	33.25	4	4	-1.5225	0.17071	NA	32.24	NA	30.14	33.05	31.48	NA	33.36	NA	33.95	31.12	NA	NA	34.57
HSA-MIR-671-5P	32.112	31.28	5	5	0.832	0.175089	33.24	NA	33	32.14	30.79	NA	31.39	31.45	NA	30.5	32.26	31.21	NA	30.98
HSA-MIR-4328	32.26	31.08	4	2	1.18	0.175132	NA	NA	32.03	32.13	32.08	NA	32.8	31.5	NA	30.66	NA	NA	NA	NA
HSA-MIR-138	33.94	31.71	3	2	2.23	0.175336	NA	NA	33.35	33.7	NA	NA	34.77	NA	32.54	NA	NA	NA	NA	30.88
HSA-MIR-7	30.74	29.5886	7	7	1.15143	0.176438	30.29	31.92	29.25	30.87	33.41	27.83	31.61	29.03	30.11	28.47	29.97	29.86	31.18	28.5
HSA-MIR-143	28.3143	29.85	7	7	-1.53571	0.197422	30.38	30.13	26.86	29.07	26.89	28.47	26.4	30.64	33.99	25.61	29.38	29.53	30.23	29.57
HSA-MIR-193A-3P	32.6875	31.72	4	3	0.9675	0.198138	32.43	NA	33.04	33.45	NA	31.83	NA	31.17	NA	32.74	NA	31.25	NA	NA
HSA-MIR-629	31.3029	30.5186	7	7	0.784286	0.199521	30.37	31.66	32.17	33.55	30.7	29.53	31.14	30.94	30.97	30.39	31.32	29.7	30.95	29.36
HSA-MIR-10B*	30.3975	31.0833	4	6	-0.685833	0.2049	NA	30.9	30.65	NA	29.25	NA	30.79	NA	31.17	32.22	30.67	30.66	30.24	31.54
HSA-MIR-3199	30.4833	30.145	3	2	0.338333	0.205577	NA	NA	30.63	NA	NA	30.47	30.35	NA	30.29	30	NA	NA	NA	NA
HSA-MIR-3939	32.545	30.82	6	3	1.725	0.206763	32.64	NA	33.19	34.03	31.67	31.62	32.12	NA	NA	30.21	NA	NA	32.71	29.54
HSA-MIR-644	32.9133	30.135	3	2	2.77833	0.207404	NA	NA	34.03	NA	31	33.71	NA	28.9	NA	NA	NA	NA	NA	31.37
HSA-MIR-194	25.0633	26.5933	3	3	-1.53	0.208674	23.45	NA	26.31	NA	NA	25.43	NA	NA	NA	26.26	26.81	NA	NA	26.71
HSA-MIR-372	33.185	34.09	2	2	-0.905	0.2142	33.56	NA	32.81	NA	NA	NA	NA	NA	33.93	NA	NA	34.25	NA	NA
HSA-MIR-499-5P	32.0525	30.81	4	2	1.2425	0.21647	NA	30.96	NA	NA	31.1	31.94	34.21	NA	NA	30.42	NA	NA	NA	31.2
HSA-MIR-1909*	32.948	31.84	5	4	1.108	0.218564	32.51	34.83	33.06	31.45	32.89	NA	NA	32.36	NA	30.21	31.75	NA	NA	33.04
HSA-MIR-339-3P	31.6543	30.6167	7	6	1.03762	0.220209	30.56	33.93	29.16	32.86	33.82	31.1	30.15	31.6	NA	30.91	31.42	29.96	29.99	29.82
HSA-MIR-3685	32.315	28.96	4	2	3.355	0.220841	33.22	NA	NA	30.35	34.76	30.93	NA	NA	30.53	NA	NA	27.39	NA	NA
HSA-MIR-663	28.5671	29.4971	7	7	-0.93	0.22331	28.83	31.04	27.53	29.17	27.71	27.98	27.71	29.92	30.67	26.69	29.48	28.74	31.02	29.96
HSA-MIR-532-3P	27.4167	28.5467	6	6	-1.13	0.22651	26.11	NA	27.53	27.59	29.31	26.21	27.75	NA	29.54	26.45	28.13	27.58	31.54	28.04
HSA-MIR-770-5P	31.94	33.18	5	4	-1.24	0.228591	30.67	31.34	32.53	33.12	NA	32.04	NA	NA	NA	34.65	31.36	34.33	NA	32.38
HSA-MIR-92A	22.7571	21.9871	7	7	0.77	0.230704	21.69	21.81	22.5	24.71	24.15	20.82	23.62	22.13	22.78	21.38	21.3	21.87	22.91	21.54
HSA-MIR-3680*	31.7267	29.92	3	2	1.80667	0.231117	NA	32.8	NA	32.79	NA	29.59	NA	NA	NA	NA	30.08	NA	29.76	NA
HSA-MIR-4267	31.68	33.35	5	3	-1.67	0.231635	33.38	31.9	31.93	29.44	NA	31.75	NA	34.42	NA	NA	31.39	NA	34.24	NA
HSA-MIR-200B*	31.11	32.74	5	5	-1.63	0.232405	NA	NA	34.35	31.18	30.41	30.89	28.72	NA	34.22	NA	30.59	30.65	34.31	33.93
HSA-MIR-10A	29.3286	29.8943	7	7	-0.565714	0.236677	28.01	29.11	30.06	29.99	29.55	29.1	29.48	29.9	29.61	28.69	29.72	30.1	29.39	31.85
HSA-MIR-374B	29.7186	30.6871	7	7	-0.968571	0.23868	28.92	30.4	30.95	31.41	30.27	27.85	28.23	31.75	32.58	28.39	31.17	28.8	31.21	30.91
HSA-MIR-450B-5P	31.14	32.97	3	4	-1.83	0.241549	NA	NA	29.54	NA	31.17	32.71	NA	NA	30.04	33.35	NA	34.84	NA	33.65
HSA-MIR-4289	28.04	27.095	7	6	0.945	0.246787	28.73	29.01	26.88	29.68	28.97	25.61	27.4	28.69	28.86	25.73	26.37	26.54	NA	26.38
RNU2-1	25.8314	27.3214	7	7	-1.49	0.247324	28.73	25.5	24.72	27.4	27.11	21.36	26	29.67	29.58	24.78	26.9	24.1	28.48	27.74
HSA-MIR-1290	27.3343	28.3014	7	7	-0.967143	0.247677	28.8	28.9	27.04	27.61	26.36	26.63	26	29.52	29.07	25.47	27.88	27.06	30.83	28.28
HSA-MIR-3153	32.6	31.895	2	4	0.705	0.248982	NA	32.24	NA	NA	NA	32.96	NA	NA	31.26	31.54	32.14	32.64	NA	NA
HSA-MIR-545*	33.81	31.4633	2	3	2.34667	0.250954	34.9	NA	NA	NA	32.72	NA	NA	NA	NA	30.72	NA	31.8	31.87	NA
HSA-MIR-223	20.8943	22.1986	7	7	-1.30429	0.251274	23.12	22.06	19.14	23.63	19.21	20.1	19	23.95	24.15	18.22	22.28	21.08	23.31	22.4
HSA-MIR-1228*	25.058	24.78	5	2	0.278	0.2553	25.59	NA	24.38	NA	25.26	24.83	25.23	NA	NA	24.74	NA	24.82	NA	NA
HSA-MIR-3907	30.0783	29.39	6	7	0.688333	0.258492	28.43	30.91	30.63	31.13	NA	28.58	30.79	30.25	29.51	28.91	28.78	28.6	30.24	29.44
HSA-MIR-3943	28.6933	29.32	6	5	-0.626667	0.260466	28.48	28.92	28.3	29.99	NA	27.48	28.99	29.93	29.01	NA	29.87	27.91	29.88	NA
HSA-MIR-25	24.11	23.4314	7	7	0.678571	0.261183	23.15	24	23.56	25.65	25.02	22.26	25.13	24.12	23.98	22.38	22.61	23.76	24.63	22.54
HSA-MIR-1913	24.904	25.72	5	6	-0.816	0.261268	23.73	NA	25.76	24.05	NA	24.8	26.18	26.66	25.81	27.49	25.07	24.19	NA	25.1
HSA-MIR-376A	31.2583	32.096	6	5	-0.837667	0.275477	31.91	NA	30.85	33.11	31.18	30.07	30.43	NA	NA	31.72	34.17	30.82	31.76	32.01
HSA-MIR-4312	32.335	33.0975	2	4	-0.7625	0.276753	31.93	NA	NA	NA	NA	NA	32.74	NA	34.29	32.56	NA	32.55	NA	32.99
HSA-MIR-1225-5P	29.635	29.065	4	2	0.57	0.277815	30.62	NA	NA	NA	29.76	28.52	29.64	NA	NA	29.08	NA	29.05	NA	NA
HSA-MIR-3937	32.365	31.4114	6	7	0.953571	0.279855	NA	33.58	32.02	29.83	31.38	33.62	33.76	32.33	30.53	34	29.87	31.69	30.94	30.52
HSA-MIR-3607-3P	30.6767	31.0667	3	3	-0.39	0.282245	NA	NA	NA	NA	30.69	31.12	30.22	NA	30.94	31.38	NA	30.88	NA	NA
HSA-MIR-508-5P	32.0775	32.936	4	5	-0.8585	0.285326	30.51	NA	33.27	32.83	NA	31.7	NA	NA	33.94	NA	31.78	33.16	33.26	32.54
HSA-MIR-127-3P	29.04	30.2243	7	7	-1.18429	0.287146	30.95	30.97	28.9	30.67	26.73	28.14	26.92	29.13	32.39	26.58	31.3	29.39	32.61	30.17
HSA-MIR-483-3P	28.0817	29.5917	6	6	-1.51	0.287732	25.32	30.28	NA	25.24	30.22	28.31	29.12	29.56	28.42	32.79	27.78	NA	32.06	26.94
HSA-MIR-635	32.02	33.525	4	2	-1.505	0.287822	32.97	33.18	NA	28.59	33.34	NA	NA	NA	33.15	NA	NA	33.9	NA	NA
HSA-MIR-521	31.49	30.465	4	4	1.025	0.290978	30.35	NA	NA	30.2	NA	32.35	33.06	30.28	29.64	NA	NA	31.92	NA	30.02
HSA-MIR-3916	32.89	32.2433	2	3	0.646667	0.291067	NA	NA	32.71	NA	NA	NA	33.07	NA	NA	33.04	NA	32.22	31.47	NA
HSA-MIR-3666	31.908	32.9325	5	4	-1.0245	0.291197	NA	30.52	NA	32.62	33.69	32.22	30.49	31.42	33.53	NA	NA	32.41	NA	34.37
HSA-MIR-29A	26.9314	28.0814	7	7	-1.15	0.296674	28.66	27.45	24.38	29.68	26.55	25.78	26.02	28.96	30.88	24.34	28.37	26.33	28.76	28.93
HSA-MIR-135A*	31.865	33.71	2	2	-1.845	0.297791	NA	NA	NA	31.73	NA	32	NA	34.66	32.76	NA	NA	NA	NA	NA
HSA-MIR-3163	31.72	30.24	3	2	1.48	0.300091	33.58	NA	NA	NA	NA	29.87	31.71	NA	NA	30.06	30.42	NA	NA	NA
HSA-MIR-1237	31.59	29.795	3	4	1.795	0.301134	NA	NA	29.3	NA	31.65	NA	33.82	29.71	29.41	NA	30.67	NA	NA	29.39
HSA-MIR-338-5P	31.34	30.2875	6	4	1.0525	0.302066	29.96	NA	29.64	32.92	34.75	30.36	30.41	NA	29.73	31.64	NA	29.75	30.03	NA
HSA-MIR-3154	31.246	32.268	5	5	-1.022	0.30219	30.7	NA	32.54	NA	30.47	32.51	30.01	34.17	30.48	31.48	33.94	31.27	NA	NA
HSA-MIR-519D	31.584	33.195	5	2	-1.611	0.304297	31.03	NA	30.09	30.05	NA	32.35	34.4	NA	NA	NA	NA	32.23	NA	34.16
HSA-MIR-138-1*	31.7675	32.905	4	6	-1.1375	0.304609	NA	33.17	31.49	NA	NA	29.33	33.08	34.25	33.32	32.8	32.97	31.86	NA	32.23
HSA-MIR-584	32.1114	31.27	7	6	0.841429	0.304949	32.66	30.33	32	34.33	32.36	31	32.1	31.55	33.76	30.96	30.24	29.38	NA	31.73
HSA-MIR-191	26.4383	27.1471	6	7	-0.70881	0.308458	26.47	28.21	26.45	NA	26.82	24.79	25.89	28.03	28.64	25.14	26.82	26.02	28.27	27.11
HSA-MIR-4326	30.6	31.785	5	4	-1.185	0.309973	30.69	30.71	NA	30.23	NA	31.06	30.31	NA	34.28	NA	29.8	32.23	NA	30.83
HSA-MIR-4285	33.245	31.908	4	5	1.337	0.310191	31.96	34.68	34.31	NA	32.03	NA	NA	30.06	NA	29.94	31.15	NA	34.87	33.52
HSA-MIR-199A-5P	31.202	30.145	5	6	1.057	0.310618	32.29	NA	NA	34.05	30.23	30.19	29.25	31.26	31.05	29.49	30.25	28.82	NA	30
HSA-MIR-181D	30.7817	30.3414	6	7	0.440238	0.31094	31.11	30.79	30.68	31.55	30.01	NA	30.55	30.91	30.06	28.51	31.52	30.35	30.46	30.58
HSA-MIR-4276	31.758	30.285	5	2	1.473	0.311243	29.53	NA	32.94	NA	34.92	31.02	30.38	NA	NA	NA	31.1	29.47	NA	NA
HSA-MIR-4259	29.2729	30.3743	7	7	-1.10143	0.316155	31.26	31.13	28.98	30.48	28.06	27.32	27.68	29.1	32.46	27.11	30.09	28.68	32.37	32.81
HSA-MIR-1224-5P	32.4175	31.43	4	3	0.9875	0.316219	NA	32.69	34.28	32.26	NA	30.44	NA	NA	32.11	NA	30.92	NA	31.26	NA
HSA-MIR-185	25.1971	24.39	7	7	0.807143	0.317877	24.46	26.7	23.97	26.34	26.27	22.9	25.74	24.7	24.5	23.05	23.7	24.24	27.38	23.16
HSA-MIR-3913	31.87	33.24	4	2	-1.37	0.319114	NA	NA	NA	31.94	33.26	31.56	30.72	NA	NA	32.38	NA	NA	NA	34.1
HSA-MIR-3175	29.57	30.525	6	6	-0.955	0.324647	NA	30.44	28.67	31.19	29.26	28.62	29.24	NA	31.51	26.89	30.35	30.22	32.36	31.82
HSA-MIR-636	32.015	30.155	2	2	1.86	0.325446	33.14	NA	30.89	NA	NA	NA	NA	30.56	29.75	NA	NA	NA	NA	NA
HSA-MIR-361-5P	29.9983	30.7743	6	7	-0.775952	0.325592	31.57	30.52	29.48	NA	30	29.53	28.89	29.85	32.75	27.82	32.24	31.46	31.42	29.88
SNORA16A	29.235	29.5075	2	4	-0.2725	0.327185	NA	NA	NA	NA	NA	29.06	29.41	NA	NA	29.21	29.49	29.64	NA	29.69
HSA-MIR-92B	27.5014	26.9586	7	7	0.542857	0.327587	26.9	27.56	28.05	28.73	28.34	25.14	27.79	26.86	28.12	26.05	26.39	26.8	27.71	26.78
HSA-MIR-1251	30.3033	30.525	3	2	-0.221667	0.329472	NA	NA	NA	30.59	30.28	NA	30.04	NA	NA	30.42	30.63	NA	NA	NA
HSA-MIR-29B-2*	31.2157	31.8629	7	7	-0.647143	0.329612	29.73	31.63	31.29	31.31	30.06	32.84	31.65	29.78	34.28	32.03	31.62	31.5	31.92	31.91
HSA-MIR-455-3P	31.27	32.945	2	2	-1.675	0.33083	30.38	NA	NA	NA	NA	32.16	NA	NA	NA	NA	33.91	31.98	NA	NA
HSA-MIR-4292	30.8017	29.9475	6	4	0.854167	0.332557	32.06	30.16	NA	29.84	30.59	29.76	32.4	28.6	30.24	NA	29.3	NA	NA	31.65
HSA-MIR-154	31.65	30.7271	7	7	0.922857	0.337396	34.98	32.75	31.37	30.13	29.02	32.15	31.15	32.76	30.59	28.63	31.73	29.8	29.54	32.04
HSA-MIR-3202	31.8233	33.455	3	2	-1.63167	0.342443	NA	NA	31.95	NA	NA	32.87	30.65	NA	NA	32.37	34.54	NA	NA	NA
HSA-MIR-20A	25.0057	24.3471	7	7	0.658571	0.342671	24.9	25.6	24.53	26.56	25.68	22.81	24.96	25.39	24.88	22.68	23.96	24.11	26.4	23.01
HSA-MIR-376B	30.685	31.6767	2	3	-0.991667	0.344599	NA	NA	30.04	NA	NA	31.33	NA	NA	NA	31.33	32.73	30.97	NA	NA
HSA-MIR-663B	30.5214	31.4067	7	6	-0.885238	0.345883	29.87	31.61	30.57	30.67	31.01	29.69	30.23	32.32	33.07	28.14	32.68	29.62	NA	32.61
HSA-MIR-346	33.61	32.4625	3	4	1.1475	0.346355	NA	NA	NA	33.25	34.96	NA	32.62	31.77	NA	NA	34.67	30.64	NA	32.77
HSA-LET-7A-2*	29.1	30.0486	7	7	-0.948571	0.34716	29.63	30.89	28.65	30.46	28	28.61	27.46	30.88	30.13	25.68	30.85	28.9	32.06	31.84
HSA-MIR-3195	23.48	24.7133	4	3	-1.23333	0.348708	22.83	24.53	NA	NA	24.2	NA	22.36	NA	NA	23.01	NA	NA	26.44	24.69
HSA-MIR-3156	32.244	33.05	5	2	-0.806	0.349274	32.74	31.03	31.77	34.45	NA	31.23	NA	NA	NA	32.6	NA	NA	NA	33.5
HSA-MIR-4298	32.854	33.4267	5	3	-0.572667	0.351648	34.07	31.63	33.08	NA	31.97	NA	33.52	NA	NA	33.53	33.94	32.81	NA	NA
HSA-MIR-488*	32.1725	31.4633	4	3	0.709167	0.352272	30.95	NA	NA	33.6	31.35	NA	32.79	30.93	NA	NA	NA	31.81	NA	31.65
HSA-MIR-1293	30.646	31.7925	5	4	-1.1465	0.352827	30.19	29.64	NA	32.01	30.39	31	NA	32.17	31.35	29.38	NA	NA	34.27	NA
HSA-MIR-1910	26.4067	27.2243	6	7	-0.817619	0.356568	24.64	NA	25.9	28.21	28.43	25.2	26.06	26.6	27.1	26.86	26.82	25.02	29.57	28.6
HSA-MIR-424	25.7271	26.6086	7	7	-0.881429	0.357125	28.3	25.69	23.9	27.72	24.89	24.67	24.92	27.48	28.52	23.63	26.15	25.61	28.72	26.15
HSA-MIR-1274A	29.005	29.7675	2	4	-0.7625	0.362014	28.48	NA	NA	NA	NA	29.53	NA	30.17	NA	29.25	29.62	30.03	NA	NA
HSA-MIR-99B	31.302	30.3429	5	7	0.959143	0.363684	29.65	34.72	30.79	30.24	NA	31.11	NA	31.13	30.91	29.25	30.74	29.23	31.69	29.45
HSA-MIR-718	25.7943	26.2083	7	6	-0.414048	0.36482	26.77	26.58	24.81	25.66	25.77	25.43	25.54	26.43	NA	25.81	25.82	25.43	27.84	25.92
HSA-MIR-4321	29.31	30.1933	4	3	-0.883333	0.364937	28.45	29.37	29.88	29.54	NA	NA	NA	NA	31.63	NA	29.86	NA	NA	29.09
HSA-MIR-1260B	24.27	24.99	7	7	-0.72	0.367058	22.34	26.14	24.15	25.48	24.85	23.49	23.44	24.68	24.91	24.15	24.19	23.36	28.16	25.48
HSA-LET-7E*	32.5283	31.6433	6	3	0.885	0.3683	34.38	NA	32.22	31.82	32.39	31.07	33.29	31.89	NA	30.28	NA	32.76	NA	NA
HSA-MIR-1284	31.215	33.19	2	2	-1.975	0.369458	31.64	NA	30.79	NA	NA	NA	NA	NA	NA	34.55	NA	NA	NA	31.83
HSA-MIR-1250	32.7967	33.72	3	2	-0.923333	0.370902	34.14	NA	31.63	32.62	NA	NA	NA	NA	NA	34.21	NA	33.23	NA	NA
HSA-MIR-548B-5P	32.1743	31.57	7	6	0.604286	0.371564	31.18	31.82	32.12	31.37	34.74	32.82	31.17	32.67	NA	30.28	30.69	32.9	31.75	31.13
HSA-MIR-4290	30.844	32.0433	5	6	-1.19933	0.373648	29.77	33.69	32.12	28.39	30.25	NA	NA	33.59	30.65	NA	32.56	31.65	34.94	28.87
HSA-MIR-3670	32.3967	31.5333	6	6	0.863333	0.375472	NA	34.81	33.94	29.66	32.85	31.3	31.82	32.84	33.32	30.52	30.67	31.57	NA	30.28
HSA-MIR-33A	29.795	30.4843	6	7	-0.689286	0.377354	30.57	32.24	28.02	NA	29.92	28.53	29.49	30.61	30.8	30.28	30.73	28.21	31.63	31.13
HSA-MIR-96	31.0567	30.2757	6	7	0.780952	0.37909	32.28	31.14	29.15	32.77	32.3	28.7	NA	31.36	30.86	28.27	29.93	29.27	31.61	30.63
HSA-MIR-16	19.1557	18.5	7	7	0.655714	0.380994	18.69	19.67	18.22	20.64	20.26	16.67	19.94	19.45	19.3	17.25	17.32	18.2	20.6	17.38
HSA-MIR-450A	31.2125	30.735	4	2	0.4775	0.382807	NA	31.6	30.13	NA	NA	32.23	30.89	NA	NA	30.57	NA	30.9	NA	NA
HSA-MIR-3193	31.425	32.82	4	3	-1.395	0.385788	NA	NA	31.79	NA	32.11	30.62	31.18	NA	NA	33.27	NA	NA	30.44	34.75
HSA-MIR-124	28.1943	28.5514	7	7	-0.357143	0.386964	28.62	27.06	29.23	27.87	28.71	28.15	27.72	29.09	29.26	26.96	28.46	28.75	28.9	28.44
HSA-MIR-142-5P	24.166	24.836	5	5	-0.67	0.387073	25.63	NA	23.23	NA	24.4	23.39	24.18	26.41	NA	22.84	25.22	24.45	NA	25.26
HSA-MIR-16-2*	27.92	27.2457	7	7	0.674286	0.387983	27.41	27.28	27.31	29.71	29.53	25.56	28.64	29.67	28.2	25.73	26.34	27.26	27.25	26.27
HSA-MIR-378	28.9214	28.02	7	7	0.901429	0.388553	28.28	29.44	27.08	33.49	29.42	26.6	28.14	28.19	29.58	26.01	26.81	28.03	29.66	27.86
HSA-MIR-32*	31.206	31.5714	5	7	-0.365429	0.389541	31.98	30.5	NA	NA	31.96	30.96	30.63	31.74	31.48	30.36	31.46	32.39	31.48	32.09
HSA-MIR-583	33.43	31.9	2	2	1.53	0.389645	NA	NA	32.31	NA	NA	34.55	NA	32.24	NA	NA	NA	31.56	NA	NA
HSA-MIR-517A	31.2167	30.68	6	6	0.536667	0.391267	NA	31.26	32.29	29.78	29.86	32.06	32.05	29.97	29.62	31.39	30.21	30.84	32.05	NA
HSA-MIR-675	29.025	29.9086	6	7	-0.883571	0.392657	NA	30.03	27.13	31.38	29.28	26.61	29.72	29.35	31.36	27.53	29.41	28.54	32.66	30.51
HSA-MIR-101*	31.9667	32.7467	6	6	-0.78	0.394113	34.67	31.13	31.09	31.85	30.25	32.81	NA	33.11	33.64	34.67	32.72	31.86	NA	30.48
HSA-MIR-4325	29.2171	28.6771	7	7	0.54	0.396991	28.66	29.2	28.81	31.43	29.84	27.17	29.41	29.02	29.36	27.63	27.88	28.32	30.42	28.11
HSA-MIR-18B	32.34	31.59	5	6	0.75	0.400616	30.87	NA	31.63	34.63	NA	32.07	32.5	30.29	30.53	31.36	33.65	32.93	NA	30.78
HSA-MIR-432*	31.16	32.1133	4	6	-0.953333	0.402447	NA	31.8	NA	NA	33.43	30.16	29.25	31.95	32.34	NA	33.49	30.04	32.34	32.52
HSA-MIR-202	33.28	31.65	2	3	1.63	0.402963	NA	NA	NA	NA	NA	32	34.56	NA	30.42	NA	NA	33.01	31.52	NA
HSA-LET-7B	23.64	23.1414	7	7	0.498571	0.404219	23.53	23.46	23.37	25.19	24.78	21.19	23.96	23.38	23.91	22.1	22.86	22.99	24.35	22.4
HSA-MIR-299-5P	33.46	32.71	4	2	0.75	0.40444	31.7	NA	NA	NA	34.98	33.59	33.57	32.27	NA	NA	NA	NA	NA	33.15
HSA-MIR-99A	29.1871	29.9343	7	7	-0.747143	0.405893	26.05	30.92	28.57	31.95	30.06	28.35	28.41	31.03	31.98	28.71	29.09	29.28	29.58	29.87
HSA-MIR-628-5P	30.4733	31.46	6	2	-0.986667	0.408439	NA	30.22	29.74	30.18	31.25	31.18	30.27	NA	NA	32.23	30.69	NA	NA	NA
HSA-MIR-3135	32.645	33.6967	4	3	-1.05167	0.408794	32.41	32.81	NA	NA	33.47	NA	31.89	NA	34.82	31.69	34.58	NA	NA	NA
HSA-MIR-30B	27.0186	27.9171	7	7	-0.898571	0.41335	25.57	29.68	26.46	28.38	28.52	24.53	25.99	28.62	28.93	25.58	27.75	25.42	31.52	27.6
HSA-MIR-148A	27.0414	27.8486	7	7	-0.807143	0.415623	26.76	29.19	25.33	29.8	26.21	25.9	26.1	28.9	29.22	25.08	27.14	26.56	30.57	27.47
HSA-MIR-30E*	30.5657	31.0029	7	7	-0.437143	0.423489	29.44	32.35	30.1	30.1	31.8	29.73	30.44	31.98	30.3	30.68	32.36	29.99	30.68	31.03
HSA-MIR-518A-3P	32.156	31.59	5	5	0.566	0.4252	NA	NA	32.52	30.94	31.5	32.49	33.33	31.08	30.42	31.01	33.42	NA	NA	32.02
HSA-MIR-454	29.13	29.6086	7	7	-0.478571	0.429107	28.37	29.21	30.4	29.66	30.3	26.81	29.16	28.84	29.99	29.82	29.29	28.41	31.26	29.65
HSA-MIR-193A-5P	30.7217	31.165	6	6	-0.443333	0.431167	30.48	NA	29	31.26	31.71	30.37	31.51	32.05	30.96	30.12	30.21	31.9	NA	31.75
HSA-MIR-549	32.248	32.675	5	2	-0.427	0.432859	31.66	31.37	NA	NA	32.51	33.58	32.12	NA	NA	32.98	NA	NA	NA	32.37
HSA-MIR-1537	31.396	32.32	5	5	-0.924	0.438345	33.67	NA	30.35	NA	30.79	31.71	30.46	NA	34.16	29.78	34.8	31.24	NA	31.62
HSA-MIR-18A*	31.2333	30.685	6	6	0.548333	0.447311	31.26	NA	33.72	31.23	31.22	30.04	29.93	NA	30.16	30.42	29.76	30.12	32.49	31.16
HSA-MIR-24	26.1333	26.6483	6	6	-0.515	0.447526	27.48	27.13	25.43	NA	26.16	25.38	25.22	27.82	NA	24.49	26.6	26.12	27.89	26.97
HSA-MIR-1282	31.95	33.1933	2	3	-1.24333	0.449215	NA	33.02	30.88	NA	NA	NA	NA	NA	NA	34.86	NA	NA	32.44	32.28
HSA-MIR-940	26.455	26.668	6	5	-0.213	0.449291	25.31	NA	26.98	26.26	26.61	26.61	26.96	26.62	NA	26.79	26.6	26.48	NA	26.85
HSA-MIR-28-5P	31.625	32.25	6	5	-0.625	0.451973	30.4	NA	31.6	33.87	33.61	30.85	29.42	32.86	NA	33	31.76	31.84	NA	31.79
HSA-MIR-199B-5P	30.9883	31.55	6	7	-0.561667	0.453891	32.78	NA	31.85	30.41	30.6	30.29	30	31.23	32.27	29.25	33.4	29.87	32.3	32.53
HSA-MIR-660	26.735	27.115	2	4	-0.38	0.454737	NA	NA	27.08	NA	NA	26.39	NA	NA	NA	26.76	27.1	27.67	NA	26.93
HSA-MIR-671-3P	31.475	32.43	4	3	-0.955	0.458624	30.98	NA	31.36	33.38	NA	NA	30.18	34.26	NA	31.12	NA	31.91	NA	NA
HSA-MIR-1307	30.1229	29.7467	7	6	0.37619	0.459348	29.19	29.02	30.5	30.65	32.11	30.26	29.13	30.57	29.73	28.96	29.75	30.24	NA	29.23
HSA-MIR-214*	30.4133	32.38	3	2	-1.96667	0.460609	32.04	NA	30.5	NA	NA	NA	28.7	NA	NA	34.19	NA	30.57	NA	NA
HSA-MIR-551B	32.384	33.055	5	2	-0.671	0.461993	NA	NA	32.17	32.26	31.38	31.6	34.51	NA	NA	32.48	NA	NA	NA	33.63
HSA-MIR-495	31.866	32.5333	5	3	-0.667333	0.462264	30.21	30.77	NA	NA	34.69	31.13	32.53	NA	32.57	32.89	NA	32.14	NA	NA
HSA-MIR-3665	30.79	31.528	4	5	-0.738	0.465009	31.28	31.58	NA	NA	31.89	NA	28.41	33.25	30.94	31.88	30.77	30.8	NA	NA
HSA-MIR-588	32.4167	31.5233	3	3	0.893333	0.468686	31.34	NA	NA	32.5	33.41	NA	NA	NA	NA	NA	30.31	NA	30.93	33.33
HSA-MIR-1273E	27.43	27.7933	5	6	-0.363333	0.470243	26.9	NA	28.68	26.35	NA	27.19	28.03	27.47	28.75	27.74	27.39	27.27	NA	28.14
HSA-MIR-505*	31.5867	32.4575	3	4	-0.870833	0.471103	30.92	30.57	NA	NA	NA	33.27	NA	NA	NA	32.73	30.72	NA	32.23	34.15
HSA-MIR-550A*	30.944	32.28	5	3	-1.336	0.473717	32.12	29.55	33.23	NA	29.76	NA	30.06	NA	NA	29.56	NA	34.58	NA	32.7
HSA-MIR-518D-3P	31.195	31.865	4	4	-0.67	0.475385	30.26	NA	31.57	30.11	NA	NA	32.84	NA	32.17	NA	NA	30.34	31.69	33.26
HSA-MIR-4330	32.2	31.5725	5	4	0.6275	0.475967	32.84	NA	NA	33.81	31.94	31.34	31.07	NA	29.71	31.75	NA	NA	32.09	32.74
HSA-MIR-3679-5P	33.795	32.03	2	2	1.765	0.478443	34.22	NA	NA	33.37	NA	NA	NA	NA	NA	30.35	33.71	NA	NA	NA
HSA-MIR-409-5P	31.99	33.49	2	2	-1.5	0.480147	NA	NA	NA	NA	NA	30.54	33.44	NA	NA	NA	32.91	NA	NA	34.07
HSA-MIR-330-3P	31.392	32.144	5	5	-0.752	0.481345	NA	31.65	32.21	31.94	32.11	NA	29.05	34.32	NA	30.58	32.53	29.96	NA	33.33
HSA-MIR-136	32.16	31.685	3	2	0.475	0.481881	NA	NA	31.34	NA	31.94	33.2	NA	NA	NA	NA	31.84	31.53	NA	NA
HSA-MIR-149	32.265	31.5525	2	4	0.7125	0.482728	32.96	NA	NA	31.57	NA	NA	NA	32.27	NA	NA	31.37	31.17	NA	31.4
HSA-MIR-3126-5P	31.124	31.635	5	6	-0.511	0.485298	NA	30.58	31.47	29.96	NA	32.83	30.78	31.57	29.48	32.35	31.12	32.89	NA	32.4
HSA-MIR-632	30.9514	31.712	7	5	-0.760571	0.486167	28.93	33.61	29.5	30.04	29.82	31.37	33.39	34.65	30.71	30.31	31.35	31.54	NA	NA
HSA-MIR-423-5P	28.1814	27.7786	7	7	0.402857	0.487595	28.1	29.4	27.3	30	28.1	26.53	27.84	28.04	28.53	26.47	27.32	27.48	29.2	27.41
HSA-MIR-3200-3P	31.68	31.0383	5	6	0.641667	0.48767	29.7	NA	31.58	31.85	34.51	30.76	NA	31.72	31.13	30.72	32.12	30.15	NA	30.39
HSA-MIR-1269	31.5186	31.0057	7	7	0.512857	0.491701	30.76	30.63	32.02	30.86	32.39	29.83	34.14	30.9	30.95	30.66	29.93	31	33.65	29.95
HSA-MIR-629*	31.365	32.3767	2	3	-1.01167	0.492819	NA	NA	30.81	NA	31.92	NA	NA	NA	NA	30.69	31.85	34.59	NA	NA
HSA-MIR-664*	32.81	32.11	3	5	0.7	0.495343	NA	34.1	NA	32.21	32.12	NA	NA	NA	31.23	31.06	34.85	32.16	NA	31.25
HSA-MIR-30E	24.464	24.125	5	4	0.339	0.496727	24.65	NA	24.37	NA	25.16	23.46	24.68	NA	NA	23.07	24.31	24.84	NA	24.28
HSA-MIR-148B*	32.382	33.4633	5	3	-1.08133	0.50395	NA	NA	33.1	34.02	31.26	30.62	32.91	NA	NA	NA	30.9	NA	34.68	34.81
HSA-MIR-15A	23.1886	22.6814	7	7	0.507143	0.504115	23.89	23.22	21.91	25.09	24.02	20.6	23.59	23.38	23.71	21.35	21.57	21.95	24.69	22.12
HSA-MIR-1914	30.71	31.435	4	4	-0.725	0.504118	30.65	NA	31.51	29.34	NA	31.34	NA	NA	29.7	NA	33.6	32.05	30.39	NA
HSA-MIR-182*	32.3571	32.9025	7	4	-0.545357	0.504808	32.68	34.69	32.55	30.5	31.89	33.37	30.82	33.35	NA	31.55	NA	NA	32.56	34.15
HSA-MIR-200A*	31.658	32.195	5	6	-0.537	0.505128	NA	32.76	29.9	32.2	31.53	31.9	NA	33.09	33.75	30.85	30.46	33.67	31.35	NA
HSA-MIR-1274B	22.0029	22.7486	7	7	-0.745714	0.50647	19.55	24.64	20.66	22.44	23.87	20.6	22.26	21.32	22.59	22.88	21.74	20.27	27.19	23.25
HSA-MIR-4327	33.38	32.5475	3	4	0.8325	0.511248	32.45	NA	33.89	NA	NA	NA	33.8	NA	31.16	NA	34.1	34.6	NA	30.33
HSA-MIR-30D	24.74	25.002	4	5	-0.262	0.51474	24.97	NA	24.79	NA	NA	24.23	24.97	26.11	NA	24.15	24.83	25.32	NA	24.6
HSA-MIR-590-5P	31.1229	30.6743	7	7	0.448571	0.519158	32.59	32.42	29.24	31.77	31.19	28.7	31.95	30.84	29.87	30.42	30.35	30.62	32.5	30.12
HSA-MIR-106A	25.7729	25.2471	7	7	0.525714	0.524041	25.21	27.24	25.11	27.21	26.53	23.5	25.61	25.81	25.61	23.55	24.67	24.91	28.43	23.75
HSA-MIR-187*	29.9283	30.4771	6	7	-0.54881	0.525523	31.17	31.59	29.48	NA	31.23	27.4	28.7	31.7	29.94	29.23	30.92	29.04	30.14	32.37
HSA-MIR-1234	30.962	31.6975	5	4	-0.7355	0.526459	30.6	29.07	31.36	30.21	33.57	NA	NA	31.62	NA	29.5	NA	32.4	NA	33.27
HSA-MIR-342-5P	30.5943	31.13	7	7	-0.535714	0.526925	34.06	29.2	29.11	30.17	30.83	29.59	31.2	31.6	31.39	29.41	32.23	30.35	33.08	29.85
HSA-MIR-720	23.3129	24.1029	7	7	-0.79	0.528068	20.47	26.28	21.86	24.24	25	21.72	23.62	23.39	23.45	24.12	22.89	21.4	29.29	24.18
HSA-MIR-4258	31.88	31.24	4	3	0.64	0.529703	NA	NA	32.96	NA	32.78	32.13	29.65	31.79	30.12	NA	NA	NA	NA	31.81
HSA-MIR-1909	30.3533	31.22	3	7	-0.866667	0.530361	NA	29.62	NA	NA	28.86	NA	32.58	31.59	31.23	29.4	32.49	31.46	31.32	31.05
HSA-MIR-1915*	31.9333	32.604	3	5	-0.670667	0.530692	NA	NA	NA	30.19	32.55	33.06	NA	32.49	NA	32.03	33.17	33.05	NA	32.28
HSA-MIR-548Q	31.715	32.9167	2	3	-1.20167	0.5309	NA	NA	NA	NA	32.99	30.44	NA	32.2	34.92	NA	31.63	NA	NA	NA
HSA-MIR-142-3P	24.5014	25.19	7	7	-0.688571	0.533584	25.23	28.08	23.55	25.85	24.05	21.57	23.18	26.21	26.38	23.19	24.47	22.84	28.24	25
HSA-MIR-105*	31.5317	31.1067	6	3	0.425	0.534015	33.91	NA	31.23	31.64	30.79	31.29	30.33	31.76	30.38	NA	NA	NA	31.18	NA
HSA-MIR-29C	26.7729	27.3429	7	7	-0.57	0.536366	27.55	27.87	24.9	29.38	26.59	25.09	26.03	29.11	29.04	24.36	26.8	26.36	28.71	27.02
HSA-MIR-92B*	30.8029	30.24	7	6	0.562857	0.543037	29.56	30.69	29.13	33.24	31.8	29.81	31.39	32.82	NA	28.22	30.53	28.4	30.39	31.08
HSA-MIR-190B	31.54	32.075	4	2	-0.535	0.543507	NA	NA	31.16	31.96	32.38	NA	30.66	31.46	32.69	NA	NA	NA	NA	NA
HSA-MIR-3180-5P	30.5	30.26	4	4	0.24	0.543852	29.96	31.41	NA	30.04	NA	NA	30.59	NA	30.15	NA	30.42	NA	30.55	29.92
HSA-MIR-363	27.74	27.2157	7	7	0.524286	0.544768	27.21	28.44	26.19	28.84	29.65	25.21	28.64	27.68	29	25.85	25.66	26.28	29.54	26.5
HSA-MIR-184	30.7775	32.465	4	2	-1.6875	0.549137	NA	30.35	NA	NA	29.82	30.61	32.33	NA	NA	34.46	NA	30.47	NA	NA
HSA-MIR-4286	24.6857	25.2914	7	7	-0.605714	0.554826	22.07	27.7	23.61	25.83	25.91	23.83	23.85	24.93	24.78	24.11	24.5	23.77	29.23	25.72
HSA-MIR-3119	32.395	32.004	2	5	0.391	0.556292	NA	NA	NA	NA	32.05	NA	32.74	30.48	33.49	31.9	32.66	NA	NA	31.49
HSA-MIR-140-5P	29.0643	29.5371	7	7	-0.472857	0.557731	30.09	31.03	28.01	29.87	28.47	28.22	27.76	31.51	30.85	26.53	28.68	29.94	30.22	29.03
HSA-MIR-320C	26.2786	25.7229	7	7	0.555714	0.559062	27.9	27.16	23.34	28.3	26.98	23.29	26.98	25.42	26.5	24.55	25.43	24.13	27.85	26.18
HSA-MIR-1303	32.0757	31.5275	7	4	0.548214	0.569828	30.69	31.99	31.16	31.93	32.91	33.83	32.02	32.47	NA	29.39	33.01	NA	NA	31.24
HSA-MIR-603	30.0833	29.5975	6	4	0.485833	0.574868	33.99	NA	28.95	29.62	28.98	29.69	29.27	NA	29.25	NA	30	29.88	29.26	NA
HSA-MIR-1972	26.372	26.862	5	5	-0.49	0.576444	26.59	27.62	NA	26.07	NA	25.67	25.91	26.25	NA	NA	25.86	25.8	29.81	26.59
HSA-MIR-92A-1*	32.8633	31.9167	3	3	0.946667	0.576562	NA	NA	32.04	NA	32.09	NA	34.46	NA	NA	NA	29.74	34.26	NA	31.75
HSA-MIR-942	30.875	31.525	6	6	-0.65	0.57872	29.5	31.69	33.95	31.88	28.53	29.7	NA	33.14	29.66	30.83	31.48	34.42	NA	29.62
HSA-MIR-1287	32.765	31.9867	2	3	0.778333	0.580514	33.66	NA	31.87	NA	NA	NA	NA	NA	30.76	NA	NA	31.57	NA	33.63
HSA-MIR-602	29.486	30.1875	5	4	-0.7015	0.582704	27.83	30.13	29.89	NA	29.83	29.75	NA	NA	NA	28.85	29.92	NA	33.36	28.62
HSA-MIR-1296	30.842	31.1483	5	6	-0.306333	0.589211	32.13	NA	NA	30.72	30.81	30.72	29.83	29.78	30.9	32.83	30.86	31.12	NA	31.4
HSA-MIR-3622B-3P	30.4743	31.125	7	6	-0.650714	0.590101	27.51	34.07	30.35	28.68	32.98	29.8	29.93	NA	29.95	32.54	30.49	31.25	33.96	28.56
HSA-MIR-1260	23.0614	23.5857	7	7	-0.524286	0.591465	20.81	26.12	22.26	23.42	24.36	21.64	22.82	22.74	23.37	23.81	22.59	21.55	27.19	23.85
HSA-MIR-340*	31.15	30.1367	4	3	1.01333	0.592763	30.32	NA	NA	NA	35	29.18	30.1	NA	NA	28.02	32.17	30.22	NA	NA
HSA-MIR-491-3P	31.5625	30.98	4	2	0.5825	0.596395	30.32	NA	33.58	29.61	NA	NA	32.74	NA	NA	NA	30.65	NA	31.31	NA
HSA-MIR-29B-1*	32.164	32.7567	5	6	-0.592667	0.597782	34.22	31.86	NA	33.31	29.77	31.66	NA	34.91	34.7	31.46	30.41	31.51	NA	33.55
HSA-MIR-146A	26.465	26.29	2	2	0.175	0.598768	NA	NA	NA	NA	NA	26.36	26.57	NA	NA	26.05	NA	26.53	NA	NA
HSA-MIR-130A	29.4586	28.9643	7	7	0.494286	0.599264	29.09	31.53	28.51	31.25	30.09	26.97	28.77	29.72	29.16	28.68	27.96	26.88	32.48	27.87
HSA-LET-7B*	30.3483	29.856	6	5	0.492333	0.599824	NA	31.85	28.55	31.6	31.08	28.56	30.45	NA	31.46	27.96	NA	29.61	31.3	28.95
HSA-MIR-451	17.4886	17.0957	7	7	0.392857	0.602648	16.12	18.19	17.23	18.55	18.4	15.11	18.82	18.62	17.9	15.63	16.12	17.19	18.65	15.56
HSA-MIR-222*	32.3667	32.785	3	2	-0.418333	0.604509	33.73	31.56	NA	NA	NA	NA	31.81	NA	32.86	NA	32.71	NA	NA	NA
HSA-MIR-4251	32.1117	31.855	6	4	0.256667	0.606009	32.09	31.94	NA	32.81	31	31.9	32.93	NA	31.58	32.54	32.38	NA	NA	30.92
HSA-MIR-518E	28.045	28.65	2	2	-0.605	0.610685	27.18	NA	NA	NA	NA	28.91	NA	28.78	NA	NA	28.52	NA	NA	NA
HSA-MIR-382	33.8625	33.21	4	2	0.6525	0.61176	NA	NA	NA	34.16	34.54	33.21	33.54	NA	NA	NA	NA	32.27	NA	34.15
HSA-MIR-19B	22.6186	22.2029	7	7	0.415714	0.614377	22.5	24.29	21.06	24.11	22.99	20.39	22.99	23.4	22.99	20.72	21.04	21.48	24.81	20.98
HSA-MIR-140-3P	26.1586	25.67	7	7	0.488571	0.614496	25.3	28.82	24.44	27.49	26.81	23.53	26.72	26.18	26.74	24.35	24.35	24.75	28.85	24.47
HSA-MIR-4278	31.5433	31.912	6	5	-0.368667	0.614898	33.9	32.3	30.67	30.37	NA	31.3	30.72	NA	30.54	NA	32.5	31.83	31.51	33.18
HSA-MIR-612	32.4733	33.2833	3	3	-0.81	0.61497	33.6	NA	NA	30.08	NA	33.74	NA	NA	NA	31.56	34.19	NA	NA	34.1
HSA-MIR-10B	29.97	30.3571	7	7	-0.387143	0.616392	29.36	27.97	30.95	33.21	29.69	29.09	29.52	31.5	30.72	28.78	30.92	28.94	30.85	30.79
HSA-MIR-26A	27.8671	28.2786	7	7	-0.411429	0.617611	27.9	28.09	28.02	30.15	28.85	25.74	26.32	28.84	30.11	26.3	28.18	26.15	29.44	28.93
HSA-MIR-664	30.9433	31.475	6	6	-0.531667	0.623955	30.31	NA	29.47	34.16	32.46	29.04	30.22	NA	34.52	31.86	29.89	30.2	31.19	31.19
HSA-MIR-31	32.9167	32.204	3	5	0.712667	0.624864	NA	NA	34.83	NA	31.12	32.8	NA	30.22	33.88	NA	32.02	30.6	NA	34.3
HSA-MIR-22*	29.9086	29.5757	7	7	0.332857	0.626577	30.58	29.87	28.8	31.41	29.7	28.11	30.89	31.07	31.69	28.7	28.45	28.28	29.36	29.48
HSA-MIR-548AA	32.405	31.59	4	2	0.815	0.626881	33.3	NA	30.93	NA	32.79	32.6	NA	NA	NA	30.36	NA	NA	32.82	NA
HSA-MIR-1976	30.2417	30.74	6	4	-0.498333	0.631069	27.71	30.74	31.58	NA	31.65	30.3	29.47	31.76	NA	29.75	29.1	NA	32.35	NA
HSA-LET-7F	26.25	26.61	7	7	-0.36	0.633643	26.23	26.4	26.26	28.51	27.37	23.13	25.85	26.07	27.46	25.72	26.63	25.17	28.04	27.18
HSA-MIR-542-3P	32.872	33.4	5	4	-0.528	0.641798	NA	NA	34.72	32.17	34.56	32.6	30.31	NA	NA	31.93	34.2	32.49	34.98	NA
HSA-MIR-130B	31.962	31.58	5	6	0.382	0.646766	33.76	NA	31.07	NA	31.58	30.81	32.59	32.33	33.94	30.33	29.93	31.16	NA	31.79
HSA-LET-7G	24.285	24.8	2	3	-0.515	0.648708	NA	NA	25.12	NA	NA	23.45	NA	NA	NA	24.12	NA	25.13	NA	25.15
HSA-MIR-369-3P	31.265	31.5925	4	4	-0.3275	0.648792	NA	31.46	NA	NA	32.51	29.53	31.56	32.13	NA	NA	NA	31.74	31.11	31.39
HSA-MIR-3605-5P	32.045	32.33	4	2	-0.285	0.649698	31.61	NA	31.63	NA	NA	33.25	31.69	NA	NA	31.93	NA	NA	NA	32.73
HSA-MIR-589	32.678	33.1	5	3	-0.422	0.650576	30.62	NA	NA	32.61	34.17	31.83	34.16	NA	33.1	32.13	NA	34.07	NA	NA
HSA-MIR-532-5P	32.0383	32.2257	6	7	-0.187381	0.65503	31.98	32.46	31.97	32.77	NA	30.77	32.28	32.89	32.64	31.63	31.8	32.58	33.09	30.95
HSA-MIR-3615	26.9714	27.19	7	6	-0.218571	0.65543	25.09	27.67	27.62	26.32	28.09	26.49	27.52	28.11	27.65	26.33	27.2	27.13	NA	26.72
HSA-MIR-378*	32.2433	32.5567	6	6	-0.313333	0.658739	31.29	NA	33	33.74	33.21	31.19	31.03	NA	34.06	31.62	32.82	31.18	33.76	31.9
HSA-MIR-3125	31.9817	32.3029	6	7	-0.32119	0.661365	31.56	NA	31.71	34.76	32.01	31.66	30.19	32.45	32.93	32.89	31.99	30.38	33.08	32.4
HSA-MIR-4300	30.1629	30.5543	7	7	-0.391429	0.663479	30.96	30.89	29.15	32.97	28.93	29.35	28.89	30.7	33.11	27.34	30.13	30.28	31.69	30.63
HSA-MIR-593	31.754	32.172	5	5	-0.418	0.666752	32.11	30.23	NA	NA	30.48	32.56	33.39	33.84	30.4	31.65	NA	33.84	NA	31.13
HSA-MIR-924	31.722	31.465	5	6	0.257	0.66782	30.3	NA	31.19	NA	31.68	33.49	31.95	31.43	32.17	30.91	31.6	NA	31.86	30.82
HSA-MIR-380	30.735	31.36	2	3	-0.625	0.668201	30.72	NA	NA	NA	NA	NA	30.75	30.21	NA	NA	NA	30	33.87	NA
HSA-MIR-16-1*	31.1643	31.4657	7	7	-0.301429	0.668645	33.29	30.57	31.24	29.71	32.46	28.81	32.07	31.67	32.86	31.11	29.95	31.77	31.49	31.41
HSA-MIR-342-3P	26.5033	25.96	6	3	0.543333	0.671165	27.56	27.1	24.82	NA	27.54	25.67	26.33	NA	NA	23.98	27.59	26.31	NA	NA
HSA-MIR-22	24.1729	23.83	7	7	0.342857	0.673817	23.77	25.04	23.17	26.02	24.7	22.3	24.21	24.64	24.57	21.89	23.02	22.88	26.96	22.85
HSA-MIR-205	31.6583	31.1817	6	6	0.476667	0.676517	28.53	NA	34.17	29.53	31.81	34.39	31.52	NA	32.09	29.54	31.04	33.11	31.05	30.26
HSA-MIR-150	24.3543	24.7957	7	7	-0.441429	0.681572	25.72	23.85	22.19	27.61	25.01	22.94	23.16	25.45	27.38	21.28	25.33	23.16	24.58	26.39
HSA-MIR-548F	31.375	32.1633	4	3	-0.788333	0.681673	32.4	28.74	NA	NA	34.63	NA	29.73	NA	NA	34.08	NA	29.88	NA	32.53
HSA-MIR-21*	31.4225	31.752	4	5	-0.3295	0.682372	NA	NA	32.06	NA	31.27	30.97	31.39	NA	30.79	30.76	34.58	31.07	NA	31.56
HSA-MIR-3136	33.79	34.105	2	2	-0.315	0.683221	NA	NA	NA	34.37	33.21	NA	NA	NA	NA	34.14	NA	NA	34.07	NA
HSA-MIR-7-2*	31.2857	31.6817	7	6	-0.395952	0.693217	30.67	31.36	31.63	27.64	32.29	34.14	31.27	NA	31.94	28.6	32.45	32.94	31.75	32.41
HSA-MIR-486-3P	30.1117	30.3471	6	7	-0.235476	0.694051	29.87	29.44	31.22	30.57	30.71	28.86	NA	30.79	29.31	29.84	31.41	32.27	30	28.81
HSA-MIR-106B	26.2171	25.8929	7	7	0.324286	0.69559	25.93	28.95	25.54	26.72	26.3	24.07	26.01	25.92	26.85	23.78	25.71	25.63	28.66	24.7
HSA-MIR-512-3P	32.108	32.46	5	4	-0.352	0.702562	NA	NA	31.99	31.15	33.74	31.81	31.85	30.5	NA	32.43	34.16	NA	32.75	NA
HSA-MIR-557	25.4457	25.5414	7	7	-0.0957143	0.703829	25.7	26.15	25.37	25.41	25.06	25.38	25.05	24.78	25.55	24.9	26.11	25.55	25.93	25.97
HSA-MIR-335*	30.71	31.1475	3	4	-0.4375	0.705302	32.44	NA	30.43	NA	NA	NA	29.26	NA	NA	29.98	30.95	NA	31.23	32.43
HSA-MIR-1827	31.725	32.252	4	5	-0.527	0.705893	NA	32.41	33.69	NA	NA	28.9	31.9	32.64	34.29	30.21	NA	30.25	NA	33.87
HSA-MIR-4320	31.865	31.4525	6	4	0.4125	0.7064	33.27	NA	32.37	32.06	30.78	31	31.71	31.03	30.95	29.69	NA	NA	NA	34.14
HSA-MIR-502-3P	29.782	29.99	5	5	-0.208	0.707984	29.76	NA	29.92	29.78	NA	28.42	31.03	NA	NA	28.77	30.08	30.34	30.81	29.95
HSA-MIR-9*	32.35	31.9667	5	3	0.383333	0.709356	NA	31.95	32.34	NA	32.32	33.08	32.06	31.04	NA	31.13	33.73	NA	NA	NA
HSA-MIR-625	33.065	32.8314	6	7	0.233571	0.711459	34.18	32.52	33.26	NA	33.74	33.52	31.17	33.01	34.12	32.05	32.12	31.95	34.65	31.92
HSA-MIR-302B	32.79	33.1667	2	3	-0.376667	0.712783	32.77	NA	NA	32.81	NA	NA	NA	31.4	33.89	NA	34.21	NA	NA	NA
HSA-MIR-505	30.43	30.1886	7	7	0.241429	0.712913	29.86	30.12	31.05	31.97	28.98	31.99	29.04	30.3	29.98	27.95	30.46	30.6	31.69	30.34
HSA-MIR-412	32.45	32.075	4	4	0.375	0.713619	32.27	NA	31.32	34.32	31.89	NA	NA	NA	NA	33.21	33.11	30.11	NA	31.87
HSA-MIR-484	27.91	27.6371	7	7	0.272857	0.71445	26.88	27.93	28.02	29.99	29.09	25.81	27.65	28.85	28.13	25.76	26.84	26.98	29.75	27.15
HSA-MIR-744	29.5757	29.3617	7	6	0.214048	0.714476	29.82	31.18	28.81	29.54	30.18	29.09	28.41	29.29	30.45	27.72	30.58	28.59	NA	29.54
HSA-MIR-101	26.3343	26.0129	7	7	0.321429	0.714612	26.48	28.29	24.63	27.8	25.88	24.22	27.04	27.26	27.68	24.27	24.53	25.17	28.31	24.87
HSA-MIR-1321	30.9857	31.15	7	4	-0.164286	0.714692	30.59	30.45	31.52	30.57	30.84	32.63	30.3	NA	31.65	31.59	30.36	31	NA	NA
HSA-MIR-30A	27.588	27.7633	5	3	-0.175333	0.71538	27.26	NA	28.33	NA	28.16	26.71	27.48	NA	NA	27.08	NA	28.08	NA	28.13
HSA-MIR-1285	32.675	32.272	4	5	0.403	0.71587	33.09	NA	30.17	NA	NA	34.08	33.36	NA	33.29	30.23	NA	32.08	33.71	32.05
HSA-MIR-431*	31.7267	32.134	3	5	-0.407333	0.716202	30.86	NA	NA	31.04	NA	33.28	NA	31.02	NA	34.27	32.11	30.22	33.05	NA
HSA-MIR-891A	31.8167	32.46	6	2	-0.643333	0.721241	30.94	32.1	30.9	NA	34.92	31.28	30.76	33.81	NA	31.11	NA	NA	NA	NA
HSA-MIR-95	31.3725	31.875	4	2	-0.5025	0.722876	31.41	34.54	30.01	NA	29.53	NA	NA	NA	NA	31.19	NA	NA	NA	32.56
HSA-MIR-320A	28.455	28.2314	6	7	0.223571	0.723093	28.3	28.41	27.54	NA	29.59	27.07	29.82	28.67	28.8	26.78	27.63	27.62	30.25	27.87
HSA-MIR-518B	30.83	31.15	3	4	-0.32	0.729488	32.27	NA	NA	30.54	NA	29.68	NA	NA	NA	31.71	30.91	31.72	30.26	NA
HSA-MIR-3150B	32.285	31.506	2	5	0.779	0.729896	33.98	NA	NA	NA	NA	NA	30.59	32.71	33.74	29.25	31.29	30.54	NA	NA
HSA-MIR-34A	31.78	31.4883	6	6	0.291667	0.730793	30.57	33.24	29.02	33.95	32.6	NA	31.3	31.4	32.61	32.24	30.88	30.66	NA	31.14
HSA-MIR-3651	31.93	31.38	6	3	0.55	0.734562	31.89	33.97	31.37	NA	32.37	31.67	30.31	NA	NA	28.66	NA	32.98	NA	32.5
HSA-MIR-1225-3P	31.36	30.972	5	5	0.388	0.739307	29.51	34.58	NA	30.36	31.88	NA	30.47	33.37	NA	NA	29.76	30.19	31.63	29.91
HSA-MIR-126*	24.4071	24.2543	7	7	0.152857	0.742969	24.69	24.8	24.13	25.35	25.07	22.9	23.91	25.66	24.92	23.46	23.65	23.58	24.84	23.67
SNORA44	30.15	30.43	2	2	-0.28	0.744939	NA	NA	NA	NA	NA	30.51	29.79	NA	NA	29.8	NA	31.06	NA	NA
HSA-MIR-548D-3P	30.915	31.23	4	4	-0.315	0.746224	NA	33.31	NA	30.09	29.35	30.91	NA	NA	NA	30.75	31.36	30.87	NA	31.94
HSA-MIR-519A	31.43	31.1867	6	6	0.243333	0.747039	32.95	NA	32	31.03	31.12	32.13	29.35	30.65	32.19	29.31	30.35	32.76	NA	31.86
HSA-MIR-765	28.5443	28.91	7	6	-0.365714	0.747941	32.66	27.93	27.27	31.26	27.49	26.52	26.68	NA	30	26.13	28.45	28.84	29.69	30.35
HSA-MIR-4291	32.7925	33.1267	4	3	-0.334167	0.748581	33.79	NA	32.26	NA	33.27	NA	31.85	NA	NA	NA	NA	31.44	33.95	33.99
HSA-MIR-10A*	33.0767	32.9	3	6	0.176667	0.750776	NA	32.85	33.11	NA	33.27	NA	NA	31.66	NA	33.21	34.71	33.72	31.37	32.73
HSA-MIR-15B*	29.08	28.8257	7	7	0.254286	0.75402	30.03	28.24	28.2	31.77	28.76	27.44	29.12	31.11	30.42	26.65	28.05	29.13	28.38	28.04
HSA-MIR-3620	31.3225	31.8467	4	3	-0.524167	0.755607	27.93	33.88	33.13	NA	30.35	NA	NA	30.22	NA	32.75	NA	NA	32.57	NA
HSA-MIR-148A*	32.41	32.01	5	3	0.4	0.755803	32.74	NA	NA	32.38	33.28	31.62	32.03	NA	32.27	29.98	NA	33.78	NA	NA
HSA-MIR-301B	31.82	32.565	2	2	-0.745	0.756506	NA	NA	30.58	NA	NA	33.06	NA	NA	NA	34.23	NA	30.9	NA	NA
HSA-MIR-4260	32.1625	32.5425	4	4	-0.38	0.758523	32.06	NA	34.27	31.62	NA	30.7	NA	NA	NA	31.55	NA	30.8	34.92	32.9
HSA-MIR-19A	23.4114	23.1671	7	7	0.244286	0.761158	23.75	25.06	22.13	24.75	23.62	21.22	23.35	24.19	24.06	21.5	22.06	22.44	25.85	22.07
HSA-MIR-328	29.5729	29.8183	7	6	-0.245476	0.763558	29.02	30.07	30.22	30.71	28.79	28.31	29.89	32.66	NA	27.41	29.27	29.12	30.57	29.88
HSA-MIR-769-3P	31.244	31.03	5	4	0.214	0.765545	31.25	NA	NA	30.85	33.37	29.81	30.94	31.04	31.55	31.53	NA	NA	NA	30
HSA-MIR-195	23.6886	23.4771	7	7	0.211429	0.765793	24.11	24.14	23.67	25.5	24.03	20.67	23.7	24.47	24.63	22.06	22.74	22.79	24.74	22.91
HSA-MIR-7-1*	31.4033	31.7633	6	6	-0.36	0.770497	32.76	30.27	28.97	NA	32.38	34.51	29.53	33.35	NA	30.46	32.28	29.35	34.63	30.51
HSA-MIR-1193	31.0971	31.5633	7	3	-0.46619	0.77234	30.45	33.45	29.74	30.4	29.71	29.56	34.37	NA	NA	29.2	NA	31.85	33.64	NA
HSA-MIR-30C-1*	32.3767	32.138	3	5	0.238667	0.776529	NA	NA	33.1	32.75	31.28	NA	NA	NA	31.95	NA	30.69	31.62	34.18	32.25
HSA-MIR-145*	32.6225	32.285	4	2	0.3375	0.776529	33.65	31.19	NA	NA	31.15	NA	34.5	NA	32.98	31.59	NA	NA	NA	NA
HSA-MIR-3691	32.3533	32.1933	3	3	0.16	0.776736	NA	NA	NA	NA	32.64	32.51	31.91	NA	32.24	31.37	NA	32.97	NA	NA
HSA-LET-7F-1*	31.81	32.1183	7	6	-0.308333	0.777256	30.43	28.96	30.25	34.93	30.88	33.79	33.43	34.59	31.99	31.88	29.89	31.29	NA	33.07
HSA-MIR-222	26.5957	26.8029	7	7	-0.207143	0.777757	27.32	27.97	25.77	27.65	26.39	25.16	25.91	26.94	27.91	24.62	26.08	25.77	29.47	26.83
HSA-MIR-4303	32.36	32.675	4	4	-0.315	0.778906	NA	NA	NA	33.27	31.69	31.52	32.96	34.85	NA	31.1	NA	33.71	NA	31.04
HSA-MIR-579	32.738	32.5	5	3	0.238	0.780802	NA	33.08	34.18	NA	32.75	32.34	31.34	NA	NA	32.66	33.54	31.3	NA	NA
HSA-MIR-877*	27.2233	27.6529	6	7	-0.429524	0.781893	24.1	29.67	30.56	24.11	28.57	26.33	NA	30.1	26.51	30.91	25.64	25.54	30.14	24.73
HSA-MIR-762	23.1443	23.37	7	7	-0.225714	0.78244	24.32	23.39	20.52	25.36	23.52	21.74	23.16	23.81	23.61	20.52	23.85	23.01	24.95	23.84
HSA-MIR-892B	30.5533	30.9133	3	3	-0.36	0.786577	29.79	NA	NA	31.78	NA	30.09	NA	NA	30.34	NA	29.44	NA	NA	32.96
HSA-MIR-210	32.31	32.1829	5	7	0.127143	0.794798	32.88	NA	32.74	32.06	32.61	31.26	NA	33.18	32.42	31.18	32.22	31.86	33.56	30.86
HSA-MIR-34C-5P	31.795	32.425	2	2	-0.63	0.795188	NA	NA	31.06	NA	NA	32.53	NA	NA	30.57	NA	34.28	NA	NA	NA
HSA-MIR-548D-5P	31.29	31.14	6	6	0.15	0.796415	31.94	NA	31.19	31.16	31	30.96	31.49	NA	32.15	30.12	29.97	33.24	31.07	30.29
HSA-MIR-634	30.865	31.14	6	4	-0.275	0.799478	28.62	29.87	33.41	31.27	NA	31.77	30.25	31.4	28.88	31.76	32.52	NA	NA	NA
HSA-MIR-196B*	31.7375	31.5267	4	3	0.210833	0.799944	NA	31.1	31.95	NA	NA	31.59	32.31	NA	32.93	30.93	NA	30.72	NA	NA
HSA-MIR-374A	29.4486	29.66	7	7	-0.211429	0.800424	28.63	30.8	29.92	30.17	29.99	27.14	29.49	29.7	32.78	27.27	30.57	28.48	30.21	28.61
HSA-MIR-4288	31.24	31.066	7	5	0.174	0.805499	29.77	34.49	31.32	30.98	31.77	30.38	29.97	30.87	31.94	30.5	31.69	30.33	NA	NA
HSA-MIR-27B*	30.0833	30.2586	6	7	-0.175238	0.806135	NA	31.1	31.18	29.29	30.05	29.55	29.33	29.05	30.38	29.86	29.49	29.42	33.72	29.89
HSA-MIR-941	30.0029	29.8971	7	7	0.105714	0.808565	28.33	30.76	31.03	29.33	30.14	29.68	30.75	29.7	29.93	29.41	30.15	30.32	29.02	30.75
HSA-MIR-345	30.5243	30.6929	7	7	-0.168571	0.808803	30.12	33.35	28.98	31.88	30.24	29.37	29.73	32.02	30.6	29.23	30.51	30.32	30.59	31.58
HSA-MIR-766	29.008	29.28	5	5	-0.272	0.813759	26.82	31.33	30.32	28.05	NA	28.52	NA	32.12	29.61	27.88	NA	28.08	NA	28.71
HSA-MIR-628-3P	31.57	31.826	3	5	-0.256	0.81633	NA	30.04	31.97	NA	NA	32.7	NA	31.83	NA	30.89	32.96	33.59	NA	29.86
HSA-MIR-598	31.4267	31.2243	6	7	0.202381	0.816332	31.65	30.7	33.99	NA	33.11	29.7	29.41	33.07	31.81	31.34	30.88	30.01	30.77	30.69
HSA-MIR-4254	29.3257	29.4386	7	7	-0.112857	0.816413	27.76	29.89	30.9	29.62	30.22	28.77	28.12	29.8	29.79	29.33	28.71	28.91	30	29.53
HSA-MIR-1911*	32.47	32.7275	3	4	-0.2575	0.816587	NA	NA	31.63	NA	34.25	31.53	NA	31.63	32.48	34.08	32.72	NA	NA	NA
HSA-MIR-3170	31.87	32.1117	4	6	-0.241667	0.816619	NA	NA	30.46	30.6	NA	33.47	32.95	34.76	NA	30.94	32.72	31.81	30.42	32.02
HSA-MIR-1236	31.9033	31.49	3	3	0.413333	0.8174	31.54	NA	NA	NA	NA	29.58	34.59	NA	32.8	NA	31.48	NA	NA	30.19
HSA-MIR-320D	32.2486	32.37	7	7	-0.121429	0.817542	31.97	32.59	31.37	32.18	32.14	32.28	33.21	32.17	33.5	30.17	32.5	33.25	33.51	31.49
HSA-MIR-25*	31.875	32.132	6	5	-0.257	0.817799	32.86	31.32	32.7	29.71	33.38	31.28	NA	NA	NA	30.31	31.27	30.43	33.96	34.69
HSA-MIR-517*	33.385	33.73	2	2	-0.345	0.821782	NA	NA	NA	NA	34.53	32.24	NA	34.34	33.12	NA	NA	NA	NA	NA
HSA-MIR-106A*	30.396	30.5633	5	6	-0.167333	0.822877	NA	30.97	32.36	NA	30.65	28.98	29.02	NA	30.99	30.36	31.76	30.77	29.51	29.99
HSA-MIR-381	32.634	32.3175	5	4	0.3165	0.825682	32.09	NA	32.67	NA	34.71	29.88	33.82	NA	NA	34.26	NA	29.16	33.07	32.78
HSA-MIR-181C*	32.1667	32.5133	3	3	-0.346667	0.827652	29.91	NA	32.95	NA	NA	NA	33.64	NA	NA	31.46	31.67	34.41	NA	NA
HSA-MIR-1205	32.23	32.444	6	5	-0.214	0.828055	32.3	NA	32.61	29.72	33.52	32.77	32.46	34.64	NA	31.36	34.07	NA	30.94	31.21
HSA-MIR-3923	31.3167	31.14	3	3	0.176667	0.830699	30.77	NA	NA	NA	31.4	31.78	NA	32.49	NA	NA	30.72	30.21	NA	NA
HSA-MIR-3115	31.56	31.448	2	5	0.112	0.832686	31.77	NA	NA	31.35	NA	NA	NA	30.84	NA	29.95	32.17	31.93	NA	32.35
HSA-MIR-1224-3P	28.9171	29.1833	7	6	-0.26619	0.835484	25.8	31.75	29.48	26.21	30.32	27.97	30.89	30.6	28.52	31.97	NA	27.27	30.47	26.27
HSA-MIR-767-3P	31.8625	31.6325	4	4	0.23	0.839172	30.37	NA	NA	31.56	31.2	34.32	NA	NA	32.91	NA	32.64	30.47	NA	30.51
HSA-MIR-141	31.36	31.23	6	4	0.13	0.839764	32.09	NA	30.15	32.37	31.6	30.62	31.33	NA	NA	30.57	32.14	32.05	NA	30.16
HSA-MIR-506	32.575	32.8667	4	3	-0.291667	0.841855	33.02	NA	NA	NA	31.78	33.09	32.41	NA	NA	NA	34.54	33.68	NA	30.38
HSA-MIR-585	31.435	31.9	2	3	-0.465	0.843345	NA	NA	29.61	NA	NA	33.26	NA	NA	NA	32.06	30.72	NA	NA	32.92
HSA-MIR-15B	24.796	24.9	5	5	-0.104	0.844915	NA	24.8	24.62	NA	25.58	23.38	25.6	NA	NA	23.77	25.24	25.03	25.65	24.81
HSA-MIR-425	24.95	25.0625	3	4	-0.1125	0.845153	25.16	NA	25.66	NA	NA	24.03	NA	NA	NA	24.6	24.96	25.6	NA	25.09
HSA-MIR-27A	23.365	23.125	4	2	0.24	0.845179	NA	NA	23.16	NA	23.33	23.83	23.14	NA	NA	22.16	NA	24.09	NA	NA
HSA-MIR-144	24.3514	24.1329	7	7	0.218571	0.845556	23.71	27.29	22.89	25.06	24.28	21.6	25.63	25.19	24.99	22.17	22.71	22.92	28.38	22.57
HSA-MIR-339-5P	30.7167	30.488	6	5	0.228667	0.849821	30.95	NA	29.46	34.91	29.51	28.6	30.87	NA	29.99	29.39	29.78	NA	33.39	29.89
HSA-MIR-651	31.9386	32.0967	7	6	-0.158095	0.854363	33.2	31.93	32.56	28.18	32.18	32.58	32.94	30.62	33.58	30.69	31.64	33.46	NA	32.59
HSA-MIR-1468	32.1917	32.0371	6	7	0.154524	0.854475	29.16	33.32	32.53	31.82	34.04	NA	32.28	31.99	31.49	30.81	33.79	32.19	33.3	30.69
HSA-MIR-425*	30.6129	30.7757	7	7	-0.162857	0.855051	29.74	32.18	29.05	31.93	31.99	29.08	30.32	32.06	30.33	27.63	33.54	30.03	30.63	31.21
HSA-MIR-221	27.9871	27.8129	7	7	0.174286	0.85878	28.79	31.91	26.48	28.95	26.89	26.85	26.04	29.16	28.14	25.47	27.38	26.52	29.63	28.39
HSA-MIR-107	29.2217	28.9967	6	6	0.225	0.859021	28.33	NA	28.93	33.52	30.66	26.61	27.28	30.23	31.3	26.8	29.07	27.72	NA	28.86
HSA-LET-7E	27.5571	27.6871	7	7	-0.13	0.860227	27.17	27.03	27.7	30.39	28.44	24.7	27.47	26.66	28.34	27.06	27.85	26.81	28.62	28.47
HSA-MIR-517B	31.708	31.6	5	3	0.108	0.86265	30.39	31.67	32.69	NA	NA	31.42	32.37	NA	NA	NA	31.45	NA	30.93	32.42
HSA-MIR-3131	32.3525	32.23	4	3	0.1225	0.865583	NA	31.07	33.54	NA	32.37	32.43	NA	32.65	31.3	NA	NA	NA	NA	32.74
HSA-MIR-204	31.8467	31.67	3	4	0.176667	0.872126	31.3	NA	32.5	NA	NA	NA	31.74	NA	NA	NA	31.26	29.89	31.12	34.41
HSA-MIR-3183	31.0875	30.8725	4	4	0.215	0.872452	33.96	NA	NA	29.83	NA	30.65	29.91	NA	32.76	30.59	NA	28.77	NA	31.37
HSA-MIR-524-3P	30.592	30.41	5	3	0.182	0.874505	30	NA	30.95	29.29	NA	30.92	31.8	28.52	NA	NA	31.66	NA	NA	31.05
HSA-LET-7A	25.1929	25.3029	7	7	-0.11	0.87536	25.31	25.05	25.04	27.52	26.15	22.33	24.95	25.01	26.38	24.29	25.45	24.12	26.41	25.46
HSA-LET-7D	28.4186	28.5743	7	7	-0.155714	0.876808	28.59	27.84	28.34	32.43	28.66	25.57	27.5	27.62	29.57	26.87	28.23	27.11	31.29	29.33
HSA-MIR-219-2-3P	33.79	33.618	2	5	0.172	0.879582	NA	NA	NA	32.9	NA	34.68	NA	33.18	NA	33.2	33.8	33.37	NA	34.54
HSA-MIR-126	25.33	25.24	7	6	0.09	0.882263	25.56	26.9	25.07	26.14	25.62	23.65	24.37	26.64	26.38	24.31	24.98	24.11	NA	25.02
HSA-MIR-511	32.645	32.8067	4	3	-0.161667	0.885618	34.25	NA	NA	32.3	31.02	33.01	NA	31.39	NA	34.22	NA	32.81	NA	NA
HSA-MIR-3656	30.2043	30.2967	7	6	-0.092381	0.885839	32.45	29.57	29.4	29.38	30.03	29.13	31.47	29.87	30.68	28.82	NA	30.05	31.85	30.51
HSA-MIR-33B*	29.29	29.442	3	5	-0.152	0.889181	27.82	29.5	NA	NA	30.55	NA	NA	31.76	29.95	28.04	NA	28.55	NA	28.91
HSA-MIR-411*	31.9333	31.7333	3	3	0.2	0.892612	30.64	NA	33.16	32	NA	NA	NA	NA	NA	33.95	NA	NA	30	31.25
HSA-MIR-497	31.302	31.1383	5	6	0.163667	0.893619	29.91	NA	29.88	NA	29.74	32.45	34.53	NA	29.85	29.64	31.61	34.28	30.21	31.24
HSA-MIR-320B	32.3525	32.414	4	5	-0.0615	0.896202	32.92	32.79	32.58	NA	NA	31.12	NA	32.35	32.68	32.79	32.02	NA	NA	32.23
HSA-MIR-2277-5P	29.4843	29.535	7	6	-0.0507143	0.89912	28.55	29.07	29.82	30.2	30	29.69	29.06	30.12	NA	28.83	29.3	28.74	30.75	29.47
HSA-MIR-490-3P	31.5967	31.4433	3	3	0.153333	0.901057	31.17	NA	NA	33.57	30.05	NA	NA	NA	NA	NA	30.6	31.74	NA	31.99
HSA-MIR-649	33.26	33.465	2	2	-0.205	0.903718	NA	NA	NA	32.65	33.87	NA	NA	NA	NA	NA	34.76	32.17	NA	NA
HSA-MIR-152	30.4686	30.3614	7	7	0.107143	0.904929	33.88	30.38	29.42	30.95	30.38	28.29	29.98	31.1	32.52	28.04	30.49	28.84	31.53	30.01
HSA-MIR-877	28.266	28.155	5	6	0.111	0.907171	29.65	29.55	NA	27.21	NA	27.38	27.54	26.78	28.49	NA	27.13	27.3	31.69	27.54
HSA-MIR-26B	25.1014	25.17	7	7	-0.0685714	0.912425	25.22	25.76	24.87	26.52	25.66	23.14	24.54	25.78	26.83	23.32	25.66	24.2	25.88	24.52
HSA-MIR-4257	32.7275	32.8175	4	4	-0.09	0.912655	NA	31.62	NA	NA	32.92	33.82	32.55	NA	NA	31.94	32.9	34.59	NA	31.84
HSA-MIR-548C-5P	31.4825	31.374	4	5	0.1085	0.913972	NA	30.27	32.48	NA	30.21	32.97	NA	33.44	NA	31.66	31.14	29.44	NA	31.19
HSA-MIR-590-3P	31.796	31.65	5	3	0.146	0.91408	NA	30.94	30.82	NA	31	31.88	34.34	NA	NA	30.81	NA	30.36	33.78	NA
HSA-MIR-1304	32.38	32.2625	3	4	0.1175	0.915353	33.17	NA	NA	31	NA	32.97	NA	NA	NA	NA	32.24	31.01	34.5	31.3
HSA-MIR-19B-1*	31.865	32.14	4	2	-0.275	0.915507	NA	NA	33.62	NA	31	30.62	32.22	NA	NA	34.17	NA	NA	NA	30.11
HSA-MIR-335	30.7671	30.7129	7	7	0.0542857	0.921332	31.26	31.6	29.55	31.86	30.79	29.49	30.82	31.43	31.92	28.8	30.77	29.77	31.21	31.09
HSA-MIR-449B	32.22	32.42	5	2	-0.2	0.92712	NA	32.31	31.84	34.18	32.39	NA	30.38	NA	NA	30.71	34.13	NA	NA	NA
HSA-MIR-28-3P	29.42	29.3675	4	4	0.0525	0.930227	28.53	NA	29.01	29.92	NA	NA	30.22	NA	28.58	28.77	30.36	NA	NA	29.76
HSA-MIR-500B	30.585	30.698	4	5	-0.113	0.932662	31.09	NA	33.4	NA	29.64	28.21	NA	30.95	32.9	29.32	30.57	29.75	NA	NA
HSA-MIR-1538	30.6333	30.7033	6	6	-0.07	0.933929	28	33.66	31.51	29.38	NA	30.71	30.54	NA	30.86	29.95	31.02	30.44	31.29	30.66
HSA-MIR-103	26.7414	26.81	7	7	-0.0685714	0.936243	26.39	28.65	26.31	27.89	27.68	23.94	26.33	26.77	28.97	24.84	26.53	25.49	28.95	26.12
HSA-MIR-29B	25.7	25.765	2	2	-0.065	0.940633	NA	NA	25.7	NA	NA	25.7	NA	NA	NA	25.07	NA	26.46	NA	NA
HSA-MIR-1306	32.8667	32.7633	3	6	0.103333	0.945461	NA	34.52	NA	NA	NA	30.37	33.71	34.41	33.73	33.71	31.31	31.75	NA	31.67
HSA-MIR-652	27.8657	27.8157	7	7	0.05	0.948796	27.27	28.94	27.22	30.49	28.08	25.8	27.26	28.72	28.39	26.04	27.25	27.05	30.11	27.15
HSA-MIR-144*	29.7486	29.8071	7	7	-0.0585714	0.949007	31.81	28.67	29.14	31.02	29.92	25.76	31.92	29.68	30.72	28.74	29.78	28.49	30.53	30.71
HSA-MIR-548H	31.705	31.6325	4	4	0.0725	0.950824	31.62	NA	NA	34.42	29.37	31.41	NA	NA	31.27	NA	NA	32.64	30.96	31.66
HSA-MIR-31*	29.955	30.0333	4	3	-0.0783333	0.953637	NA	NA	32.6	NA	28.7	29.47	29.05	28.48	NA	NA	29.98	31.64	NA	NA
HSA-MIR-875-3P	31.85	31.95	4	2	-0.1	0.955307	32.44	NA	NA	32.49	31.44	31.03	NA	NA	NA	NA	NA	30.54	NA	33.36
HSA-MIR-4293	33.4433	33.4875	3	4	-0.0441667	0.95756	34.52	NA	33.38	NA	NA	32.43	NA	NA	NA	33.7	NA	32.33	33.2	34.72
HSA-MIR-326	31.03	30.9533	5	6	0.0766667	0.95827	28.68	34.46	NA	NA	33.04	27.99	30.98	32.25	30.65	29.81	29.81	29.55	33.65	NA
HSA-MIR-595	32.8933	32.8529	3	7	0.0404762	0.958345	NA	32.21	NA	34.12	NA	NA	32.35	32.89	33.01	34.47	32.8	33.11	32.69	31
HSA-MIR-3605-3P	32.735	32.6567	2	3	0.0783333	0.958571	NA	NA	NA	NA	NA	32	33.47	NA	31.02	NA	34.94	32.01	NA	NA
HSA-MIR-1283	31.81	31.7725	4	4	0.0375	0.959214	NA	NA	31.58	NA	30.85	32.96	31.85	31.27	32.81	30.47	32.54	NA	NA	NA
HSA-MIR-4306	30.81	30.87	5	4	-0.06	0.959748	30.21	NA	31.85	NA	29.82	29.84	32.33	NA	30.39	30.38	NA	29.02	33.69	NA
HSA-MIR-148B	28.4371	28.4786	7	7	-0.0414286	0.960459	29.65	29.94	27.07	29.41	28.3	26.75	27.94	29.55	29.97	26.38	27.23	27.4	31.16	27.66
HSA-MIR-146B-5P	27.33	27.285	3	2	0.045	0.966146	NA	NA	26.83	NA	NA	27.07	28.09	NA	NA	26.47	NA	28.1	NA	NA
HSA-MIR-103A-2*	29.966	29.99	5	7	-0.024	0.970356	30.7	NA	29.13	NA	30.47	28.66	30.87	31.07	30.22	28.48	28.96	29.86	31.83	29.51
HSA-MIR-4314	27.62	27.6667	4	3	-0.0466667	0.971409	28.49	27.69	27.32	NA	NA	NA	26.98	25.99	NA	27.2	NA	NA	29.81	NA
HSA-MIR-3663-3P	32.3125	32.3525	4	4	-0.04	0.972781	NA	NA	32.28	32.48	31.9	32.59	NA	NA	33.9	NA	34.4	29.94	NA	31.17
HSA-LET-7F-2*	30.9657	30.94	7	7	0.0257143	0.973934	30.5	30.05	30.42	33.57	32.49	29.84	29.89	33.66	30.89	29.39	30.04	29.93	31.58	31.09
HSA-MIR-423-3P	28.9714	28.9529	7	7	0.0185714	0.981214	28.67	30.14	28.3	31.46	29.08	27.89	27.26	29.44	30.83	26.22	29.52	28	29.56	29.1
HSA-MIR-186	27.624	27.6367	5	6	-0.0126667	0.982113	27.6	28.6	27.58	NA	NA	26.47	27.87	28.92	28.4	26.1	27.62	28.03	NA	26.75
HSA-MIR-29C*	30.648	30.664	5	5	-0.016	0.98289	30.06	NA	31.68	29.94	30.12	31.44	NA	NA	31.1	29.12	30.18	30.15	NA	32.77
HSA-MIR-3200-5P	30.42	30.435	3	4	-0.015	0.983152	NA	NA	29.39	NA	NA	31.32	30.55	NA	30.4	NA	NA	30.18	29.75	31.41
HSA-MIR-520D-3P	31.0933	31.07	3	3	0.0233333	0.983771	30.3	NA	NA	NA	NA	29.92	33.06	NA	NA	NA	31.64	30.97	NA	30.6
HSA-MIR-122*	30.8433	30.8	3	3	0.0433333	0.987971	25.99	NA	34.53	NA	32.01	NA	NA	31.37	NA	30.15	NA	NA	NA	30.88
HSA-MIR-365	29.766	29.7567	5	3	0.00933333	0.989917	29.4	NA	28.73	NA	30.7	30.26	29.74	NA	NA	28.6	NA	30.09	30.58	NA
HSA-MIR-150*	29.322	29.325	5	2	-0.003	0.99049	28.47	NA	29.21	29.67	NA	29.47	29.79	NA	NA	29.29	NA	29.36	NA	NA
HSA-LET-7C	27.66	27.6557	7	7	0.00428571	0.994082	27.07	28.17	27.47	29.38	28.56	25.39	27.58	27.2	28.46	26.81	28.21	26.81	28.71	27.39
HSA-MIR-501-5P	32.26	32.26	4	3	0	1	NA	NA	33.76	31.99	NA	30.98	32.31	NA	33.04	31.04	NA	NA	NA	32.7
HSA-LET-7C*	NA	NA	0	0	NA	NA	NA	NA	NA	NA	NA	NA	NA	NA	NA	NA	NA	NA	NA	NA
HSA-MIR-1	33.04	32.28	5	1	0.76	NA	NA	34.02	32.59	NA	33.24	32.71	32.64	NA	NA	NA	NA	NA	32.28	NA
HSA-MIR-100*	32.52	NA	1	0	NA	NA	NA	NA	NA	32.52	NA	NA	NA	NA	NA	NA	NA	NA	NA	NA
HSA-MIR-103-AS	NA	NA	0	0	NA	NA	NA	NA	NA	NA	NA	NA	NA	NA	NA	NA	NA	NA	NA	NA
HSA-MIR-105	NA	34.15	0	1	NA	NA	NA	NA	NA	NA	NA	NA	NA	NA	NA	NA	NA	NA	NA	34.15
HSA-MIR-106B*	26.28	NA	1	0	NA	NA	NA	NA	NA	NA	NA	26.28	NA	NA	NA	NA	NA	NA	NA	NA
HSA-MIR-1178	31.835	NA	2	0	NA	NA	NA	NA	NA	30.77	NA	32.9	NA	NA	NA	NA	NA	NA	NA	NA
HSA-MIR-1179	31.525	31.18	2	1	0.345	NA	NA	NA	NA	NA	NA	31.75	31.3	NA	NA	NA	NA	NA	NA	31.18
HSA-MIR-1182	NA	NA	0	0	NA	NA	NA	NA	NA	NA	NA	NA	NA	NA	NA	NA	NA	NA	NA	NA
HSA-MIR-1183	NA	NA	0	0	NA	NA	NA	NA	NA	NA	NA	NA	NA	NA	NA	NA	NA	NA	NA	NA
HSA-MIR-1185	33.22	29.71	1	1	3.51	NA	NA	NA	NA	NA	33.22	NA	NA	NA	NA	NA	NA	29.71	NA	NA
HSA-MIR-1197	NA	34	0	1	NA	NA	NA	NA	NA	NA	NA	NA	NA	NA	NA	NA	NA	34	NA	NA
HSA-MIR-1200	NA	NA	0	0	NA	NA	NA	NA	NA	NA	NA	NA	NA	NA	NA	NA	NA	NA	NA	NA
HSA-MIR-1206	NA	NA	0	0	NA	NA	NA	NA	NA	NA	NA	NA	NA	NA	NA	NA	NA	NA	NA	NA
HSA-MIR-1243	NA	NA	0	0	NA	NA	NA	NA	NA	NA	NA	NA	NA	NA	NA	NA	NA	NA	NA	NA
HSA-MIR-1248	32.42	33.2	1	1	-0.78	NA	NA	NA	NA	NA	NA	32.42	NA	NA	NA	NA	NA	33.2	NA	NA
HSA-MIR-1252	NA	NA	0	0	NA	NA	NA	NA	NA	NA	NA	NA	NA	NA	NA	NA	NA	NA	NA	NA
HSA-MIR-1255A	32.62	34.67	1	1	-2.05	NA	NA	32.62	NA	NA	NA	NA	NA	NA	NA	NA	NA	NA	NA	34.67
HSA-MIR-1255B	NA	32.09	0	1	NA	NA	NA	NA	NA	NA	NA	NA	NA	NA	NA	NA	NA	32.09	NA	NA
HSA-MIR-1256	NA	NA	0	0	NA	NA	NA	NA	NA	NA	NA	NA	NA	NA	NA	NA	NA	NA	NA	NA
HSA-MIR-1257	NA	NA	0	0	NA	NA	NA	NA	NA	NA	NA	NA	NA	NA	NA	NA	NA	NA	NA	NA
HSA-MIR-1258	NA	NA	0	0	NA	NA	NA	NA	NA	NA	NA	NA	NA	NA	NA	NA	NA	NA	NA	NA
HSA-MIR-125A-3P	NA	30.68	0	1	NA	NA	NA	NA	NA	NA	NA	NA	NA	NA	NA	NA	NA	NA	30.68	NA
HSA-MIR-125B-1*	NA	NA	0	0	NA	NA	NA	NA	NA	NA	NA	NA	NA	NA	NA	NA	NA	NA	NA	NA
HSA-MIR-1261	NA	NA	0	0	NA	NA	NA	NA	NA	NA	NA	NA	NA	NA	NA	NA	NA	NA	NA	NA
HSA-MIR-1262	30.39	31.23	2	1	-0.84	NA	NA	NA	NA	29.89	NA	30.89	NA	NA	NA	NA	NA	NA	NA	31.23
HSA-MIR-1264	NA	NA	0	0	NA	NA	NA	NA	NA	NA	NA	NA	NA	NA	NA	NA	NA	NA	NA	NA
HSA-MIR-1272	29.87	33.23	1	3	-3.36	NA	NA	NA	NA	NA	29.87	NA	NA	NA	34.04	32.36	33.29	NA	NA	NA
HSA-MIR-1273	NA	NA	0	0	NA	NA	NA	NA	NA	NA	NA	NA	NA	NA	NA	NA	NA	NA	NA	NA
HSA-MIR-1273C	NA	32.635	0	2	NA	NA	NA	NA	NA	NA	NA	NA	NA	NA	NA	NA	NA	34.21	NA	31.06
HSA-MIR-1273D	32.4167	31.69	6	1	0.726667	NA	34.26	32.09	31.28	32.71	31.75	NA	32.41	NA	NA	31.69	NA	NA	NA	NA
HSA-MIR-1277	32.48	32.77	1	1	-0.29	NA	NA	NA	NA	NA	NA	NA	32.48	NA	NA	NA	NA	32.77	NA	NA
HSA-MIR-1278	NA	NA	0	0	NA	NA	NA	NA	NA	NA	NA	NA	NA	NA	NA	NA	NA	NA	NA	NA
HSA-MIR-129-3P	31.16	33.1567	1	3	-1.99667	NA	NA	31.16	NA	NA	NA	NA	NA	NA	34.91	32.03	NA	32.53	NA	NA
HSA-MIR-129-5P	NA	31.71	0	1	NA	NA	NA	NA	NA	NA	NA	NA	NA	NA	NA	NA	31.71	NA	NA	NA
HSA-MIR-129*	NA	33.005	0	2	NA	NA	NA	NA	NA	NA	NA	NA	NA	NA	34.6	NA	NA	NA	NA	31.41
HSA-MIR-1291	NA	NA	0	0	NA	NA	NA	NA	NA	NA	NA	NA	NA	NA	NA	NA	NA	NA	NA	NA
HSA-MIR-1294	32.16	34.3	2	1	-2.14	NA	NA	32.39	31.93	NA	NA	NA	NA	NA	NA	NA	34.3	NA	NA	NA
HSA-MIR-1299	33.045	31.97	2	1	1.075	NA	NA	NA	NA	32.27	NA	NA	33.82	NA	NA	NA	NA	NA	NA	31.97
HSA-MIR-1302	NA	NA	0	0	NA	NA	NA	NA	NA	NA	NA	NA	NA	NA	NA	NA	NA	NA	NA	NA
HSA-MIR-1305	32.3367	NA	3	0	NA	NA	NA	34.4	31.17	NA	NA	NA	31.44	NA	NA	NA	NA	NA	NA	NA
HSA-MIR-132*	NA	NA	0	0	NA	NA	NA	NA	NA	NA	NA	NA	NA	NA	NA	NA	NA	NA	NA	NA
HSA-MIR-1324	NA	NA	0	0	NA	NA	NA	NA	NA	NA	NA	NA	NA	NA	NA	NA	NA	NA	NA	NA
HSA-MIR-133B	NA	NA	0	0	NA	NA	NA	NA	NA	NA	NA	NA	NA	NA	NA	NA	NA	NA	NA	NA
HSA-MIR-134	29.9	NA	1	0	NA	NA	29.9	NA	NA	NA	NA	NA	NA	NA	NA	NA	NA	NA	NA	NA
HSA-MIR-135A	NA	NA	0	0	NA	NA	NA	NA	NA	NA	NA	NA	NA	NA	NA	NA	NA	NA	NA	NA
HSA-MIR-135B	NA	NA	0	0	NA	NA	NA	NA	NA	NA	NA	NA	NA	NA	NA	NA	NA	NA	NA	NA
HSA-MIR-135B*	32.075	NA	2	0	NA	NA	NA	NA	NA	NA	NA	31.93	32.22	NA	NA	NA	NA	NA	NA	NA
HSA-MIR-137	NA	NA	0	0	NA	NA	NA	NA	NA	NA	NA	NA	NA	NA	NA	NA	NA	NA	NA	NA
HSA-MIR-139-3P	30.02	29.67	1	1	0.35	NA	NA	NA	NA	NA	30.02	NA	NA	NA	NA	NA	NA	29.67	NA	NA
HSA-MIR-139-5P	28.76	NA	1	0	NA	NA	28.76	NA	NA	NA	NA	NA	NA	NA	NA	NA	NA	NA	NA	NA
HSA-MIR-141*	34.22	32.705	1	2	1.515	NA	NA	NA	NA	34.22	NA	NA	NA	NA	30.67	NA	NA	NA	NA	34.74
HSA-MIR-1469	26.53	26.41	2	1	0.12	NA	26.59	NA	NA	NA	NA	26.47	NA	NA	NA	26.41	NA	NA	NA	NA
HSA-MIR-147B	NA	NA	0	0	NA	NA	NA	NA	NA	NA	NA	NA	NA	NA	NA	NA	NA	NA	NA	NA
HSA-MIR-154*	31.54	32.94	3	1	-1.4	NA	NA	NA	NA	32.26	31.05	31.31	NA	NA	32.94	NA	NA	NA	NA	NA
HSA-MIR-155*	NA	NA	0	0	NA	NA	NA	NA	NA	NA	NA	NA	NA	NA	NA	NA	NA	NA	NA	NA
HSA-MIR-15A*	NA	NA	0	0	NA	NA	NA	NA	NA	NA	NA	NA	NA	NA	NA	NA	NA	NA	NA	NA
HSA-MIR-183*	29.84	32.5033	1	3	-2.66333	NA	NA	NA	29.84	NA	NA	NA	NA	NA	34.76	NA	30.65	32.1	NA	NA
HSA-MIR-186*	NA	31.915	0	2	NA	NA	NA	NA	NA	NA	NA	NA	NA	NA	NA	NA	NA	31.34	NA	32.49
HSA-MIR-188-3P	NA	NA	0	0	NA	NA	NA	NA	NA	NA	NA	NA	NA	NA	NA	NA	NA	NA	NA	NA
HSA-MIR-193B	NA	NA	0	0	NA	NA	NA	NA	NA	NA	NA	NA	NA	NA	NA	NA	NA	NA	NA	NA
HSA-MIR-193B*	32.32	NA	1	0	NA	NA	NA	NA	32.32	NA	NA	NA	NA	NA	NA	NA	NA	NA	NA	NA
HSA-MIR-198	34.96	NA	1	0	NA	NA	NA	NA	NA	NA	NA	NA	34.96	NA	NA	NA	NA	NA	NA	NA
HSA-MIR-19A*	NA	NA	0	0	NA	NA	NA	NA	NA	NA	NA	NA	NA	NA	NA	NA	NA	NA	NA	NA
HSA-MIR-19B-2*	NA	31.53	0	2	NA	NA	NA	NA	NA	NA	NA	NA	NA	NA	NA	NA	NA	30.77	NA	32.29
HSA-MIR-200A	31.93	31.41	4	1	0.52	NA	32.53	NA	NA	NA	33.02	32.99	29.18	NA	NA	31.41	NA	NA	NA	NA
HSA-MIR-200B	NA	NA	0	0	NA	NA	NA	NA	NA	NA	NA	NA	NA	NA	NA	NA	NA	NA	NA	NA
HSA-MIR-200C*	NA	NA	0	0	NA	NA	NA	NA	NA	NA	NA	NA	NA	NA	NA	NA	NA	NA	NA	NA
HSA-MIR-203	30.565	NA	2	0	NA	NA	30.17	NA	30.96	NA	NA	NA	NA	NA	NA	NA	NA	NA	NA	NA
HSA-MIR-2115*	34.73	31.84	1	4	2.89	NA	NA	NA	NA	NA	34.73	NA	NA	NA	31.67	31.26	NA	33.75	NA	30.68
HSA-MIR-217	NA	NA	0	0	NA	NA	NA	NA	NA	NA	NA	NA	NA	NA	NA	NA	NA	NA	NA	NA
HSA-MIR-218-2*	NA	NA	0	0	NA	NA	NA	NA	NA	NA	NA	NA	NA	NA	NA	NA	NA	NA	NA	NA
HSA-MIR-219-1-3P	30.06	31.14	1	1	-1.08	NA	NA	NA	NA	NA	NA	NA	30.06	NA	NA	NA	NA	NA	NA	31.14
HSA-MIR-221*	32.315	32.43	2	1	-0.115	NA	NA	NA	32.28	NA	NA	NA	32.35	NA	NA	32.43	NA	NA	NA	NA
HSA-MIR-224	31.5725	30.39	4	1	1.1825	NA	32.66	NA	30.24	NA	30.48	32.91	NA	NA	30.39	NA	NA	NA	NA	NA
HSA-MIR-23B*	NA	31.24	0	1	NA	NA	NA	NA	NA	NA	NA	NA	NA	NA	NA	NA	NA	31.24	NA	NA
HSA-MIR-24-1*	32.715	31.99	2	1	0.725	NA	33.04	NA	NA	NA	32.39	NA	NA	NA	NA	NA	NA	NA	31.99	NA
HSA-MIR-26A-1*	NA	30.46	0	1	NA	NA	NA	NA	NA	NA	NA	NA	NA	NA	NA	NA	NA	30.46	NA	NA
HSA-MIR-26A-2*	NA	NA	0	0	NA	NA	NA	NA	NA	NA	NA	NA	NA	NA	NA	NA	NA	NA	NA	NA
HSA-MIR-2909	NA	NA	0	0	NA	NA	NA	NA	NA	NA	NA	NA	NA	NA	NA	NA	NA	NA	NA	NA
HSA-MIR-297	31.32	NA	1	0	NA	NA	NA	NA	NA	NA	31.32	NA	NA	NA	NA	NA	NA	NA	NA	NA
HSA-MIR-298	NA	NA	0	0	NA	NA	NA	NA	NA	NA	NA	NA	NA	NA	NA	NA	NA	NA	NA	NA
HSA-MIR-302A*	32.28	NA	1	0	NA	NA	NA	NA	NA	NA	NA	NA	32.28	NA	NA	NA	NA	NA	NA	NA
HSA-MIR-302B*	NA	NA	0	0	NA	NA	NA	NA	NA	NA	NA	NA	NA	NA	NA	NA	NA	NA	NA	NA
HSA-MIR-302C	NA	NA	0	0	NA	NA	NA	NA	NA	NA	NA	NA	NA	NA	NA	NA	NA	NA	NA	NA
HSA-MIR-302C*	31.87	31.94	2	1	-0.07	NA	31.89	NA	NA	31.85	NA	NA	NA	NA	NA	NA	NA	NA	31.94	NA
HSA-MIR-30B*	32.045	NA	2	0	NA	NA	33.39	30.7	NA	NA	NA	NA	NA	NA	NA	NA	NA	NA	NA	NA
HSA-MIR-30C-2*	NA	NA	0	0	NA	NA	NA	NA	NA	NA	NA	NA	NA	NA	NA	NA	NA	NA	NA	NA
HSA-MIR-3116	32.385	NA	2	0	NA	NA	NA	NA	NA	33.03	NA	31.74	NA	NA	NA	NA	NA	NA	NA	NA
HSA-MIR-3117	32.9	34.82	1	1	-1.92	NA	32.9	NA	NA	NA	NA	NA	NA	NA	NA	NA	NA	NA	NA	34.82
HSA-MIR-3118	33.95	NA	1	0	NA	NA	NA	33.95	NA	NA	NA	NA	NA	NA	NA	NA	NA	NA	NA	NA
HSA-MIR-3120	NA	NA	0	0	NA	NA	NA	NA	NA	NA	NA	NA	NA	NA	NA	NA	NA	NA	NA	NA
HSA-MIR-3124	32.92	32.47	3	1	0.45	NA	33.73	NA	NA	NA	NA	31.38	33.65	NA	NA	NA	NA	32.47	NA	NA
HSA-MIR-3128	NA	NA	0	0	NA	NA	NA	NA	NA	NA	NA	NA	NA	NA	NA	NA	NA	NA	NA	NA
HSA-MIR-3129	NA	NA	0	0	NA	NA	NA	NA	NA	NA	NA	NA	NA	NA	NA	NA	NA	NA	NA	NA
HSA-MIR-3133	NA	NA	0	0	NA	NA	NA	NA	NA	NA	NA	NA	NA	NA	NA	NA	NA	NA	NA	NA
HSA-MIR-3140	32.78	29.11	1	1	3.67	NA	NA	NA	32.78	NA	NA	NA	NA	NA	NA	NA	29.11	NA	NA	NA
HSA-MIR-3143	NA	NA	0	0	NA	NA	NA	NA	NA	NA	NA	NA	NA	NA	NA	NA	NA	NA	NA	NA
HSA-MIR-3144-3P	NA	NA	0	0	NA	NA	NA	NA	NA	NA	NA	NA	NA	NA	NA	NA	NA	NA	NA	NA
HSA-MIR-3145	33.465	33.23	2	1	0.235	NA	NA	NA	NA	NA	NA	32.69	34.24	NA	NA	NA	NA	33.23	NA	NA
HSA-MIR-3146	NA	NA	0	0	NA	NA	NA	NA	NA	NA	NA	NA	NA	NA	NA	NA	NA	NA	NA	NA
HSA-MIR-3147	NA	NA	0	0	NA	NA	NA	NA	NA	NA	NA	NA	NA	NA	NA	NA	NA	NA	NA	NA
HSA-MIR-3148	NA	NA	0	0	NA	NA	NA	NA	NA	NA	NA	NA	NA	NA	NA	NA	NA	NA	NA	NA
HSA-MIR-3149	NA	NA	0	0	NA	NA	NA	NA	NA	NA	NA	NA	NA	NA	NA	NA	NA	NA	NA	NA
HSA-MIR-3152	NA	NA	0	0	NA	NA	NA	NA	NA	NA	NA	NA	NA	NA	NA	NA	NA	NA	NA	NA
HSA-MIR-3160	34.91	NA	1	0	NA	NA	34.91	NA	NA	NA	NA	NA	NA	NA	NA	NA	NA	NA	NA	NA
HSA-MIR-3162	NA	NA	0	0	NA	NA	NA	NA	NA	NA	NA	NA	NA	NA	NA	NA	NA	NA	NA	NA
HSA-MIR-3164	NA	31.52	0	1	NA	NA	NA	NA	NA	NA	NA	NA	NA	NA	NA	NA	31.52	NA	NA	NA
HSA-MIR-3165	33.16	NA	2	0	NA	NA	34.95	NA	NA	NA	NA	31.37	NA	NA	NA	NA	NA	NA	NA	NA
HSA-MIR-3166	NA	NA	0	0	NA	NA	NA	NA	NA	NA	NA	NA	NA	NA	NA	NA	NA	NA	NA	NA
HSA-MIR-3167	NA	NA	0	0	NA	NA	NA	NA	NA	NA	NA	NA	NA	NA	NA	NA	NA	NA	NA	NA
HSA-MIR-3168	NA	31.145	0	2	NA	NA	NA	NA	NA	NA	NA	NA	NA	NA	31.98	NA	30.31	NA	NA	NA
HSA-MIR-3171	NA	NA	0	0	NA	NA	NA	NA	NA	NA	NA	NA	NA	NA	NA	NA	NA	NA	NA	NA
HSA-MIR-3173	NA	NA	0	0	NA	NA	NA	NA	NA	NA	NA	NA	NA	NA	NA	NA	NA	NA	NA	NA
HSA-MIR-3177	31.848	31.89	5	1	-0.042	NA	NA	30.97	34.13	31.93	NA	29.35	32.86	NA	NA	NA	NA	NA	NA	31.89
HSA-MIR-3179	31.06	NA	1	0	NA	NA	NA	NA	31.06	NA	NA	NA	NA	NA	NA	NA	NA	NA	NA	NA
HSA-MIR-3180	NA	NA	0	0	NA	NA	NA	NA	NA	NA	NA	NA	NA	NA	NA	NA	NA	NA	NA	NA
HSA-MIR-3182	34.79	NA	2	0	NA	NA	34.85	34.73	NA	NA	NA	NA	NA	NA	NA	NA	NA	NA	NA	NA
HSA-MIR-3185	33.14	30.7367	1	3	2.40333	NA	NA	NA	33.14	NA	NA	NA	NA	NA	NA	29.71	32.31	30.19	NA	NA
HSA-MIR-3186-3P	NA	NA	0	0	NA	NA	NA	NA	NA	NA	NA	NA	NA	NA	NA	NA	NA	NA	NA	NA
HSA-MIR-3186-5P	32.39	NA	1	0	NA	NA	NA	NA	NA	NA	32.39	NA	NA	NA	NA	NA	NA	NA	NA	NA
HSA-MIR-3187	31.1525	33.12	4	1	-1.9675	NA	29.92	NA	NA	NA	33.77	30.23	30.69	NA	NA	NA	NA	NA	NA	33.12
HSA-MIR-3189	NA	NA	0	0	NA	NA	NA	NA	NA	NA	NA	NA	NA	NA	NA	NA	NA	NA	NA	NA
HSA-MIR-3190	31.76	NA	1	0	NA	NA	NA	NA	NA	NA	31.76	NA	NA	NA	NA	NA	NA	NA	NA	NA
HSA-MIR-323B-5P	30.6975	32.39	4	1	-1.6925	NA	NA	31.22	31.72	NA	29.83	30.02	NA	NA	NA	NA	NA	32.39	NA	NA
HSA-MIR-325	NA	NA	0	0	NA	NA	NA	NA	NA	NA	NA	NA	NA	NA	NA	NA	NA	NA	NA	NA
HSA-MIR-331-3P	NA	NA	0	0	NA	NA	NA	NA	NA	NA	NA	NA	NA	NA	NA	NA	NA	NA	NA	NA
HSA-MIR-331-5P	31.38	NA	1	0	NA	NA	31.38	NA	NA	NA	NA	NA	NA	NA	NA	NA	NA	NA	NA	NA
HSA-MIR-34A*	32.65	31.57	1	2	1.08	NA	NA	NA	NA	NA	NA	32.65	NA	NA	NA	31.44	NA	NA	NA	31.7
HSA-MIR-34B	33.6925	NA	4	0	NA	NA	32.26	NA	NA	34.52	33.59	NA	34.4	NA	NA	NA	NA	NA	NA	NA
HSA-MIR-34B*	31.2233	31.11	3	1	0.113333	NA	NA	31.22	NA	NA	NA	32.25	30.2	NA	NA	NA	NA	31.11	NA	NA
HSA-MIR-34C-3P	NA	NA	0	0	NA	NA	NA	NA	NA	NA	NA	NA	NA	NA	NA	NA	NA	NA	NA	NA
HSA-MIR-361-3P	NA	NA	0	0	NA	NA	NA	NA	NA	NA	NA	NA	NA	NA	NA	NA	NA	NA	NA	NA
HSA-MIR-3610	NA	NA	0	0	NA	NA	NA	NA	NA	NA	NA	NA	NA	NA	NA	NA	NA	NA	NA	NA
HSA-MIR-3611	31.87	NA	1	0	NA	NA	NA	NA	NA	NA	NA	NA	31.87	NA	NA	NA	NA	NA	NA	NA
HSA-MIR-3612	29.79	NA	1	0	NA	NA	NA	NA	NA	NA	NA	NA	29.79	NA	NA	NA	NA	NA	NA	NA
HSA-MIR-3614-3P	NA	NA	0	0	NA	NA	NA	NA	NA	NA	NA	NA	NA	NA	NA	NA	NA	NA	NA	NA
HSA-MIR-3616-3P	32.0675	32.44	4	1	-0.3725	NA	31.89	NA	NA	32.2	32.42	31.76	NA	NA	NA	NA	NA	32.44	NA	NA
HSA-MIR-3617	31.19	31.44	1	1	-0.25	NA	NA	NA	NA	NA	NA	31.19	NA	NA	31.44	NA	NA	NA	NA	NA
HSA-MIR-3618	NA	NA	0	0	NA	NA	NA	NA	NA	NA	NA	NA	NA	NA	NA	NA	NA	NA	NA	NA
HSA-MIR-3621	28.9625	32.56	4	1	-3.5975	NA	28.7	NA	29.88	NA	29.46	27.81	NA	NA	NA	NA	NA	NA	32.56	NA
HSA-MIR-363*	31.7133	NA	3	0	NA	NA	30.64	NA	NA	NA	30.61	NA	33.89	NA	NA	NA	NA	NA	NA	NA
HSA-MIR-3646	31.6	NA	1	0	NA	NA	NA	NA	NA	NA	NA	31.6	NA	NA	NA	NA	NA	NA	NA	NA
HSA-MIR-3647-3P	33.8925	31.16	4	1	2.7325	NA	NA	NA	34.73	NA	34.49	32.61	33.74	NA	NA	31.16	NA	NA	NA	NA
HSA-MIR-3648	NA	NA	0	0	NA	NA	NA	NA	NA	NA	NA	NA	NA	NA	NA	NA	NA	NA	NA	NA
HSA-MIR-3650	32.55	30.23	1	1	2.32	NA	NA	NA	NA	NA	NA	NA	32.55	NA	NA	30.23	NA	NA	NA	NA
HSA-MIR-3658	31.5933	NA	3	0	NA	NA	NA	NA	NA	31.74	32.47	NA	30.57	NA	NA	NA	NA	NA	NA	NA
HSA-MIR-3661	NA	NA	0	0	NA	NA	NA	NA	NA	NA	NA	NA	NA	NA	NA	NA	NA	NA	NA	NA
HSA-MIR-3662	NA	NA	0	0	NA	NA	NA	NA	NA	NA	NA	NA	NA	NA	NA	NA	NA	NA	NA	NA
HSA-MIR-3664	NA	NA	0	0	NA	NA	NA	NA	NA	NA	NA	NA	NA	NA	NA	NA	NA	NA	NA	NA
HSA-MIR-3668	NA	NA	0	0	NA	NA	NA	NA	NA	NA	NA	NA	NA	NA	NA	NA	NA	NA	NA	NA
HSA-MIR-367	NA	NA	0	0	NA	NA	NA	NA	NA	NA	NA	NA	NA	NA	NA	NA	NA	NA	NA	NA
HSA-MIR-3672	NA	NA	0	0	NA	NA	NA	NA	NA	NA	NA	NA	NA	NA	NA	NA	NA	NA	NA	NA
HSA-MIR-3673	NA	NA	0	0	NA	NA	NA	NA	NA	NA	NA	NA	NA	NA	NA	NA	NA	NA	NA	NA
HSA-MIR-3674	NA	NA	0	0	NA	NA	NA	NA	NA	NA	NA	NA	NA	NA	NA	NA	NA	NA	NA	NA
HSA-MIR-3678-3P	NA	NA	0	0	NA	NA	NA	NA	NA	NA	NA	NA	NA	NA	NA	NA	NA	NA	NA	NA
HSA-MIR-3678-5P	NA	30.93	0	2	NA	NA	NA	NA	NA	NA	NA	NA	NA	NA	NA	NA	30.15	NA	NA	31.71
HSA-MIR-3680	32.105	NA	2	0	NA	NA	32.56	NA	NA	NA	31.65	NA	NA	NA	NA	NA	NA	NA	NA	NA
HSA-MIR-3681	NA	NA	0	0	NA	NA	NA	NA	NA	NA	NA	NA	NA	NA	NA	NA	NA	NA	NA	NA
HSA-MIR-3681*	NA	NA	0	0	NA	NA	NA	NA	NA	NA	NA	NA	NA	NA	NA	NA	NA	NA	NA	NA
HSA-MIR-3682	NA	34.2	0	1	NA	NA	NA	NA	NA	NA	NA	NA	NA	NA	NA	NA	NA	NA	NA	34.2
HSA-MIR-3683	NA	NA	0	0	NA	NA	NA	NA	NA	NA	NA	NA	NA	NA	NA	NA	NA	NA	NA	NA
HSA-MIR-3684	NA	30.63	0	2	NA	NA	NA	NA	NA	NA	NA	NA	NA	NA	31.18	30.08	NA	NA	NA	NA
HSA-MIR-3686	NA	NA	0	0	NA	NA	NA	NA	NA	NA	NA	NA	NA	NA	NA	NA	NA	NA	NA	NA
HSA-MIR-3689B	31.7867	31.97	3	1	-0.183333	NA	30.3	NA	NA	31.43	33.63	NA	NA	NA	NA	31.97	NA	NA	NA	NA
HSA-MIR-3689B*	NA	NA	0	0	NA	NA	NA	NA	NA	NA	NA	NA	NA	NA	NA	NA	NA	NA	NA	NA
HSA-MIR-3692	NA	NA	0	0	NA	NA	NA	NA	NA	NA	NA	NA	NA	NA	NA	NA	NA	NA	NA	NA
HSA-MIR-370	NA	NA	0	0	NA	NA	NA	NA	NA	NA	NA	NA	NA	NA	NA	NA	NA	NA	NA	NA
HSA-MIR-371-5P	32.31	33.04	3	1	-0.73	NA	32.24	NA	NA	NA	NA	31.89	32.8	NA	NA	33.04	NA	NA	NA	NA
HSA-MIR-3713	NA	NA	0	0	NA	NA	NA	NA	NA	NA	NA	NA	NA	NA	NA	NA	NA	NA	NA	NA
HSA-MIR-373	NA	NA	0	0	NA	NA	NA	NA	NA	NA	NA	NA	NA	NA	NA	NA	NA	NA	NA	NA
HSA-MIR-373*	NA	NA	0	0	NA	NA	NA	NA	NA	NA	NA	NA	NA	NA	NA	NA	NA	NA	NA	NA
HSA-MIR-374A*	NA	NA	0	0	NA	NA	NA	NA	NA	NA	NA	NA	NA	NA	NA	NA	NA	NA	NA	NA
HSA-MIR-374B*	34.89	31.43	1	2	3.46	NA	NA	NA	NA	NA	NA	34.89	NA	NA	NA	31.17	NA	NA	NA	31.69
HSA-MIR-376C	NA	NA	0	0	NA	NA	NA	NA	NA	NA	NA	NA	NA	NA	NA	NA	NA	NA	NA	NA
HSA-MIR-377*	31.37	32.6467	1	3	-1.27667	NA	NA	NA	NA	NA	NA	31.37	NA	NA	NA	34.32	NA	31.84	NA	31.78
HSA-MIR-378C	32.31	31.64	2	1	0.67	NA	NA	NA	NA	33.29	NA	31.33	NA	NA	31.64	NA	NA	NA	NA	NA
HSA-MIR-379	NA	NA	0	0	NA	NA	NA	NA	NA	NA	NA	NA	NA	NA	NA	NA	NA	NA	NA	NA
HSA-MIR-379*	NA	NA	0	0	NA	NA	NA	NA	NA	NA	NA	NA	NA	NA	NA	NA	NA	NA	NA	NA
HSA-MIR-380*	NA	NA	0	0	NA	NA	NA	NA	NA	NA	NA	NA	NA	NA	NA	NA	NA	NA	NA	NA
HSA-MIR-383	30.21	NA	1	0	NA	NA	30.21	NA	NA	NA	NA	NA	NA	NA	NA	NA	NA	NA	NA	NA
HSA-MIR-384	NA	NA	0	0	NA	NA	NA	NA	NA	NA	NA	NA	NA	NA	NA	NA	NA	NA	NA	NA
HSA-MIR-3911	31.0367	30.97	3	1	0.0666667	NA	30.89	NA	NA	29.73	NA	NA	32.49	NA	NA	NA	30.97	NA	NA	NA
HSA-MIR-3912	NA	NA	0	0	NA	NA	NA	NA	NA	NA	NA	NA	NA	NA	NA	NA	NA	NA	NA	NA
HSA-MIR-3914	NA	NA	0	0	NA	NA	NA	NA	NA	NA	NA	NA	NA	NA	NA	NA	NA	NA	NA	NA
HSA-MIR-3915	NA	NA	0	0	NA	NA	NA	NA	NA	NA	NA	NA	NA	NA	NA	NA	NA	NA	NA	NA
HSA-MIR-3917	33.8	NA	3	0	NA	NA	32.69	NA	NA	33.82	NA	34.89	NA	NA	NA	NA	NA	NA	NA	NA
HSA-MIR-3918	27.07	NA	1	0	NA	NA	27.07	NA	NA	NA	NA	NA	NA	NA	NA	NA	NA	NA	NA	NA
HSA-MIR-3919	NA	NA	0	0	NA	NA	NA	NA	NA	NA	NA	NA	NA	NA	NA	NA	NA	NA	NA	NA
HSA-MIR-3921	32.02	34.25	1	1	-2.23	NA	32.02	NA	NA	NA	NA	NA	NA	NA	NA	NA	34.25	NA	NA	NA
HSA-MIR-3927	NA	NA	0	0	NA	NA	NA	NA	NA	NA	NA	NA	NA	NA	NA	NA	NA	NA	NA	NA
HSA-MIR-3945	33.49	NA	2	0	NA	NA	NA	33.76	NA	NA	NA	33.22	NA	NA	NA	NA	NA	NA	NA	NA
HSA-MIR-422A	NA	32.76	0	2	NA	NA	NA	NA	NA	NA	NA	NA	NA	NA	NA	32.63	NA	32.89	NA	NA
HSA-MIR-424*	NA	NA	0	0	NA	NA	NA	NA	NA	NA	NA	NA	NA	NA	NA	NA	NA	NA	NA	NA
HSA-MIR-4252	30.6775	NA	4	0	NA	NA	31.14	29.49	NA	31.04	NA	31.04	NA	NA	NA	NA	NA	NA	NA	NA
HSA-MIR-4263	31.365	34.72	2	1	-3.355	NA	NA	NA	31.24	NA	NA	NA	31.49	NA	NA	34.72	NA	NA	NA	NA
HSA-MIR-4264	NA	NA	0	0	NA	NA	NA	NA	NA	NA	NA	NA	NA	NA	NA	NA	NA	NA	NA	NA
HSA-MIR-4275	33.94	32.215	1	2	1.725	NA	33.94	NA	NA	NA	NA	NA	NA	NA	32.12	NA	32.31	NA	NA	NA
HSA-MIR-4277	NA	NA	0	0	NA	NA	NA	NA	NA	NA	NA	NA	NA	NA	NA	NA	NA	NA	NA	NA
HSA-MIR-429	NA	NA	0	0	NA	NA	NA	NA	NA	NA	NA	NA	NA	NA	NA	NA	NA	NA	NA	NA
HSA-MIR-4297	NA	NA	0	0	NA	NA	NA	NA	NA	NA	NA	NA	NA	NA	NA	NA	NA	NA	NA	NA
HSA-MIR-4302	32.285	31.75	2	1	0.535	NA	32.09	NA	NA	NA	NA	NA	32.48	NA	NA	NA	31.75	NA	NA	NA
HSA-MIR-4305	31.285	31.32	2	1	-0.035	NA	31.13	NA	NA	NA	NA	NA	31.44	NA	NA	NA	NA	NA	NA	31.32
HSA-MIR-4307	32.19	31.53	2	1	0.66	NA	NA	NA	NA	31.42	NA	32.96	NA	NA	NA	NA	NA	31.53	NA	NA
HSA-MIR-4308	33.46	32.205	1	2	1.255	NA	NA	NA	NA	NA	NA	NA	33.46	NA	32.18	NA	NA	32.23	NA	NA
HSA-MIR-4309	NA	34.74	0	1	NA	NA	NA	NA	NA	NA	NA	NA	NA	NA	NA	34.74	NA	NA	NA	NA
HSA-MIR-4310	NA	NA	0	0	NA	NA	NA	NA	NA	NA	NA	NA	NA	NA	NA	NA	NA	NA	NA	NA
HSA-MIR-4315	32.79	NA	3	0	NA	NA	34.29	NA	32.91	NA	NA	NA	31.17	NA	NA	NA	NA	NA	NA	NA
HSA-MIR-4319	31.43	30.21	1	1	1.22	NA	NA	NA	31.43	NA	NA	NA	NA	NA	NA	30.21	NA	NA	NA	NA
HSA-MIR-432	30.57	32.1967	1	6	-1.62667	NA	NA	NA	NA	NA	NA	30.57	NA	NA	31.44	32.54	31.87	30.78	31.57	34.98
HSA-MIR-433	33.35	NA	1	0	NA	NA	33.35	NA	NA	NA	NA	NA	NA	NA	NA	NA	NA	NA	NA	NA
HSA-MIR-448	NA	31.93	0	1	NA	NA	NA	NA	NA	NA	NA	NA	NA	NA	NA	NA	NA	31.93	NA	NA
HSA-MIR-449A	31.58	NA	1	0	NA	NA	NA	NA	NA	NA	NA	NA	31.58	NA	NA	NA	NA	NA	NA	NA
HSA-MIR-449B*	28.42	NA	1	0	NA	NA	NA	NA	NA	NA	NA	NA	28.42	NA	NA	NA	NA	NA	NA	NA
HSA-MIR-449C	32	NA	1	0	NA	NA	NA	NA	NA	NA	NA	32	NA	NA	NA	NA	NA	NA	NA	NA
HSA-MIR-450B-3P	33.0567	32.56	3	1	0.496667	NA	NA	NA	NA	31.57	NA	33.93	33.67	NA	NA	NA	NA	32.56	NA	NA
HSA-MIR-452	31.04	32.82	1	1	-1.78	NA	NA	NA	NA	NA	31.04	NA	NA	NA	NA	NA	NA	32.82	NA	NA
HSA-MIR-455-5P	31.9733	31.12	3	1	0.853333	NA	32.39	NA	NA	NA	29.83	33.7	NA	NA	NA	NA	NA	NA	31.12	NA
HSA-MIR-487A	30.17	32	1	1	-1.83	NA	NA	NA	NA	NA	NA	NA	30.17	NA	NA	NA	NA	32	NA	NA
HSA-MIR-489	NA	NA	0	0	NA	NA	NA	NA	NA	NA	NA	NA	NA	NA	NA	NA	NA	NA	NA	NA
HSA-MIR-490-5P	33.955	32.63	2	1	1.325	NA	NA	NA	NA	34.9	33.01	NA	NA	NA	NA	NA	NA	NA	NA	32.63
HSA-MIR-491-5P	31.2267	30.63	3	1	0.596667	NA	32.38	NA	30.89	NA	NA	NA	30.41	NA	NA	NA	NA	NA	NA	30.63
HSA-MIR-492	33.82	32.1967	1	3	1.62333	NA	NA	NA	33.82	NA	NA	NA	NA	NA	NA	32.42	31.61	32.56	NA	NA
HSA-MIR-493	34.58	34.63	1	2	-0.05	NA	NA	NA	NA	NA	NA	NA	34.58	NA	NA	34.49	NA	34.77	NA	NA
HSA-MIR-497*	34.04	32.55	1	1	1.49	NA	NA	NA	NA	NA	NA	34.04	NA	NA	NA	NA	NA	NA	NA	32.55
HSA-MIR-499-3P	31.52	31.56	1	1	-0.04	NA	NA	NA	NA	NA	NA	NA	31.52	NA	NA	NA	NA	NA	NA	31.56
HSA-MIR-508-3P	33.825	NA	2	0	NA	NA	NA	NA	34.76	NA	NA	NA	32.89	NA	NA	NA	NA	NA	NA	NA
HSA-MIR-509-3P	NA	NA	0	0	NA	NA	NA	NA	NA	NA	NA	NA	NA	NA	NA	NA	NA	NA	NA	NA
HSA-MIR-510	33.95	NA	1	0	NA	NA	33.95	NA	NA	NA	NA	NA	NA	NA	NA	NA	NA	NA	NA	NA
HSA-MIR-513A-3P	NA	NA	0	0	NA	NA	NA	NA	NA	NA	NA	NA	NA	NA	NA	NA	NA	NA	NA	NA
HSA-MIR-513A-5P	34.94	32.72	1	1	2.22	NA	34.94	NA	NA	NA	NA	NA	NA	NA	NA	NA	32.72	NA	NA	NA
HSA-MIR-514	NA	NA	0	0	NA	NA	NA	NA	NA	NA	NA	NA	NA	NA	NA	NA	NA	NA	NA	NA
HSA-MIR-514B-3P	33.33	33.725	1	2	-0.395	NA	NA	NA	NA	NA	33.33	NA	NA	NA	NA	NA	33.7	NA	NA	33.75
HSA-MIR-515-5P	NA	NA	0	0	NA	NA	NA	NA	NA	NA	NA	NA	NA	NA	NA	NA	NA	NA	NA	NA
HSA-MIR-516A-3P	NA	NA	0	0	NA	NA	NA	NA	NA	NA	NA	NA	NA	NA	NA	NA	NA	NA	NA	NA
HSA-MIR-516B	33.85	31.34	1	1	2.51	NA	NA	NA	33.85	NA	NA	NA	NA	NA	NA	NA	31.34	NA	NA	NA
HSA-MIR-518C	33.9567	32.73	3	1	1.22667	NA	34.6	NA	34.06	NA	NA	NA	33.21	NA	NA	NA	NA	NA	NA	32.73
HSA-MIR-518F	30.86	31.675	1	4	-0.815	NA	NA	NA	NA	NA	NA	NA	30.86	NA	NA	30.32	30.23	32.78	NA	33.37
HSA-MIR-519B-3P	NA	NA	0	0	NA	NA	NA	NA	NA	NA	NA	NA	NA	NA	NA	NA	NA	NA	NA	NA
HSA-MIR-519C-3P	NA	NA	0	0	NA	NA	NA	NA	NA	NA	NA	NA	NA	NA	NA	NA	NA	NA	NA	NA
HSA-MIR-519E	NA	NA	0	0	NA	NA	NA	NA	NA	NA	NA	NA	NA	NA	NA	NA	NA	NA	NA	NA
HSA-MIR-519E*	31.31	31.17	1	1	0.14	NA	31.31	NA	NA	NA	NA	NA	NA	NA	NA	NA	31.17	NA	NA	NA
HSA-MIR-520A-3P	NA	32.355	0	2	NA	NA	NA	NA	NA	NA	NA	NA	NA	NA	NA	NA	29.95	NA	NA	34.76
HSA-MIR-520B	NA	NA	0	0	NA	NA	NA	NA	NA	NA	NA	NA	NA	NA	NA	NA	NA	NA	NA	NA
HSA-MIR-520E	NA	NA	0	0	NA	NA	NA	NA	NA	NA	NA	NA	NA	NA	NA	NA	NA	NA	NA	NA
HSA-MIR-520F	NA	NA	0	0	NA	NA	NA	NA	NA	NA	NA	NA	NA	NA	NA	NA	NA	NA	NA	NA
HSA-MIR-520H	NA	NA	0	0	NA	NA	NA	NA	NA	NA	NA	NA	NA	NA	NA	NA	NA	NA	NA	NA
HSA-MIR-523	31.274	29.55	5	1	1.724	NA	31.53	NA	NA	34.02	30.21	30.51	30.1	NA	NA	29.55	NA	NA	NA	NA
HSA-MIR-526B	NA	NA	0	0	NA	NA	NA	NA	NA	NA	NA	NA	NA	NA	NA	NA	NA	NA	NA	NA
HSA-MIR-526B*	30.26	30.45	3	1	-0.19	NA	NA	NA	32.3	NA	NA	29.57	28.91	NA	NA	30.45	NA	NA	NA	NA
HSA-MIR-527	NA	34.285	0	2	NA	NA	NA	NA	NA	NA	NA	NA	NA	NA	NA	NA	34.33	NA	34.24	NA
HSA-MIR-539	32.81	NA	1	0	NA	NA	NA	NA	32.81	NA	NA	NA	NA	NA	NA	NA	NA	NA	NA	NA
HSA-MIR-544	NA	30.43	0	1	NA	NA	NA	NA	NA	NA	NA	NA	NA	NA	NA	30.43	NA	NA	NA	NA
HSA-MIR-548A-3P	32.33	31.4425	1	4	0.8875	NA	NA	NA	NA	32.33	NA	NA	NA	NA	NA	30.82	32.84	31.36	NA	30.75
HSA-MIR-548A-5P	NA	NA	0	0	NA	NA	NA	NA	NA	NA	NA	NA	NA	NA	NA	NA	NA	NA	NA	NA
HSA-MIR-548B-3P	NA	NA	0	0	NA	NA	NA	NA	NA	NA	NA	NA	NA	NA	NA	NA	NA	NA	NA	NA
HSA-MIR-548E	33.204	33.49	5	1	-0.286	NA	30.67	33.8	34.73	NA	34.5	32.32	NA	NA	NA	NA	33.49	NA	NA	NA
HSA-MIR-548G	NA	NA	0	0	NA	NA	NA	NA	NA	NA	NA	NA	NA	NA	NA	NA	NA	NA	NA	NA
HSA-MIR-548I	NA	34.285	0	2	NA	NA	NA	NA	NA	NA	NA	NA	NA	NA	NA	NA	34.14	34.43	NA	NA
HSA-MIR-548J	NA	NA	0	0	NA	NA	NA	NA	NA	NA	NA	NA	NA	NA	NA	NA	NA	NA	NA	NA
HSA-MIR-548K	32.495	NA	2	0	NA	NA	NA	NA	34.85	NA	NA	NA	30.14	NA	NA	NA	NA	NA	NA	NA
HSA-MIR-548L	31.1233	NA	3	0	NA	NA	NA	31.37	NA	NA	NA	31.01	30.99	NA	NA	NA	NA	NA	NA	NA
HSA-MIR-548N	NA	31.54	0	1	NA	NA	NA	NA	NA	NA	NA	NA	NA	NA	NA	NA	NA	NA	NA	31.54
HSA-MIR-548O	30.21	29.92	1	1	0.29	NA	NA	NA	NA	NA	NA	30.21	NA	NA	NA	NA	29.92	NA	NA	NA
HSA-MIR-548P	NA	31.9	0	1	NA	NA	NA	NA	NA	NA	NA	NA	NA	NA	NA	31.9	NA	NA	NA	NA
HSA-MIR-548S	32.56	32.61	2	1	-0.05	NA	NA	NA	NA	32.49	32.63	NA	NA	NA	NA	NA	NA	NA	NA	32.61
HSA-MIR-548V	NA	NA	0	0	NA	NA	NA	NA	NA	NA	NA	NA	NA	NA	NA	NA	NA	NA	NA	NA
HSA-MIR-548W	32.02	34.13	2	1	-2.11	NA	NA	NA	NA	NA	NA	30.1	33.94	NA	NA	NA	NA	34.13	NA	NA
HSA-MIR-548Y	NA	NA	0	0	NA	NA	NA	NA	NA	NA	NA	NA	NA	NA	NA	NA	NA	NA	NA	NA
HSA-MIR-550B	NA	NA	0	0	NA	NA	NA	NA	NA	NA	NA	NA	NA	NA	NA	NA	NA	NA	NA	NA
HSA-MIR-551B*	30.79	NA	2	0	NA	NA	NA	NA	NA	NA	31.4	NA	30.18	NA	NA	NA	NA	NA	NA	NA
HSA-MIR-553	NA	NA	0	0	NA	NA	NA	NA	NA	NA	NA	NA	NA	NA	NA	NA	NA	NA	NA	NA
HSA-MIR-561	NA	NA	0	0	NA	NA	NA	NA	NA	NA	NA	NA	NA	NA	NA	NA	NA	NA	NA	NA
HSA-MIR-562	NA	NA	0	0	NA	NA	NA	NA	NA	NA	NA	NA	NA	NA	NA	NA	NA	NA	NA	NA
HSA-MIR-567	32.63	NA	1	0	NA	NA	NA	32.63	NA	NA	NA	NA	NA	NA	NA	NA	NA	NA	NA	NA
HSA-MIR-570	NA	NA	0	0	NA	NA	NA	NA	NA	NA	NA	NA	NA	NA	NA	NA	NA	NA	NA	NA
HSA-MIR-572	NA	NA	0	0	NA	NA	NA	NA	NA	NA	NA	NA	NA	NA	NA	NA	NA	NA	NA	NA
HSA-MIR-573	NA	NA	0	0	NA	NA	NA	NA	NA	NA	NA	NA	NA	NA	NA	NA	NA	NA	NA	NA
HSA-MIR-576-3P	NA	NA	0	0	NA	NA	NA	NA	NA	NA	NA	NA	NA	NA	NA	NA	NA	NA	NA	NA
HSA-MIR-578	NA	NA	0	0	NA	NA	NA	NA	NA	NA	NA	NA	NA	NA	NA	NA	NA	NA	NA	NA
HSA-MIR-582-3P	30.87	34.3	2	1	-3.43	NA	NA	NA	31.58	NA	NA	30.16	NA	NA	NA	34.3	NA	NA	NA	NA
HSA-MIR-586	NA	NA	0	0	NA	NA	NA	NA	NA	NA	NA	NA	NA	NA	NA	NA	NA	NA	NA	NA
HSA-MIR-592	NA	NA	0	0	NA	NA	NA	NA	NA	NA	NA	NA	NA	NA	NA	NA	NA	NA	NA	NA
HSA-MIR-597	NA	NA	0	0	NA	NA	NA	NA	NA	NA	NA	NA	NA	NA	NA	NA	NA	NA	NA	NA
HSA-MIR-607	NA	NA	0	0	NA	NA	NA	NA	NA	NA	NA	NA	NA	NA	NA	NA	NA	NA	NA	NA
HSA-MIR-608	NA	29.96	0	1	NA	NA	NA	NA	NA	NA	NA	NA	NA	NA	NA	NA	NA	29.96	NA	NA
HSA-MIR-609	30.47	32.5	1	1	-2.03	NA	NA	NA	NA	NA	NA	NA	30.47	NA	NA	NA	NA	32.5	NA	NA
HSA-MIR-613	30.47	NA	1	0	NA	NA	30.47	NA	NA	NA	NA	NA	NA	NA	NA	NA	NA	NA	NA	NA
HSA-MIR-614	NA	NA	0	0	NA	NA	NA	NA	NA	NA	NA	NA	NA	NA	NA	NA	NA	NA	NA	NA
HSA-MIR-616	30.75	32.085	1	2	-1.335	NA	NA	NA	NA	NA	NA	NA	30.75	NA	NA	NA	30.54	NA	NA	33.63
HSA-MIR-616*	NA	32.04	0	1	NA	NA	NA	NA	NA	NA	NA	NA	NA	NA	NA	32.04	NA	NA	NA	NA
HSA-MIR-617	NA	NA	0	0	NA	NA	NA	NA	NA	NA	NA	NA	NA	NA	NA	NA	NA	NA	NA	NA
HSA-MIR-618	NA	NA	0	0	NA	NA	NA	NA	NA	NA	NA	NA	NA	NA	NA	NA	NA	NA	NA	NA
HSA-MIR-619	NA	NA	0	0	NA	NA	NA	NA	NA	NA	NA	NA	NA	NA	NA	NA	NA	NA	NA	NA
HSA-MIR-620	NA	NA	0	0	NA	NA	NA	NA	NA	NA	NA	NA	NA	NA	NA	NA	NA	NA	NA	NA
HSA-MIR-624	NA	NA	0	0	NA	NA	NA	NA	NA	NA	NA	NA	NA	NA	NA	NA	NA	NA	NA	NA
HSA-MIR-630	NA	34.32	0	1	NA	NA	NA	NA	NA	NA	NA	NA	NA	NA	NA	NA	34.32	NA	NA	NA
HSA-MIR-637	34.125	NA	2	0	NA	NA	33.29	NA	NA	NA	NA	NA	34.96	NA	NA	NA	NA	NA	NA	NA
HSA-MIR-640	NA	NA	0	0	NA	NA	NA	NA	NA	NA	NA	NA	NA	NA	NA	NA	NA	NA	NA	NA
HSA-MIR-642A	NA	NA	0	0	NA	NA	NA	NA	NA	NA	NA	NA	NA	NA	NA	NA	NA	NA	NA	NA
HSA-MIR-643	NA	33.385	0	2	NA	NA	NA	NA	NA	NA	NA	NA	NA	NA	NA	32.75	NA	34.02	NA	NA
HSA-MIR-645	32.18	33.245	1	2	-1.065	NA	32.18	NA	NA	NA	NA	NA	NA	NA	31.98	NA	NA	34.51	NA	NA
HSA-MIR-647	NA	NA	0	0	NA	NA	NA	NA	NA	NA	NA	NA	NA	NA	NA	NA	NA	NA	NA	NA
HSA-MIR-648	NA	NA	0	0	NA	NA	NA	NA	NA	NA	NA	NA	NA	NA	NA	NA	NA	NA	NA	NA
HSA-MIR-653	NA	NA	0	0	NA	NA	NA	NA	NA	NA	NA	NA	NA	NA	NA	NA	NA	NA	NA	NA
HSA-MIR-654-3P	32.22	32.5967	1	3	-0.376667	NA	NA	NA	NA	NA	NA	32.22	NA	NA	NA	33.43	NA	31.84	NA	32.52
HSA-MIR-655	NA	32.6	0	1	NA	NA	NA	NA	NA	NA	NA	NA	NA	NA	NA	NA	NA	NA	32.6	NA
HSA-MIR-670	33.98	NA	1	0	NA	NA	NA	NA	NA	NA	33.98	NA	NA	NA	NA	NA	NA	NA	NA	NA
HSA-MIR-676*	NA	NA	0	0	NA	NA	NA	NA	NA	NA	NA	NA	NA	NA	NA	NA	NA	NA	NA	NA
HSA-MIR-708*	32.23	NA	1	0	NA	NA	NA	NA	NA	NA	32.23	NA	NA	NA	NA	NA	NA	NA	NA	NA
HSA-MIR-711	29.12	NA	1	0	NA	NA	29.12	NA	NA	NA	NA	NA	NA	NA	NA	NA	NA	NA	NA	NA
HSA-MIR-764	32.81	NA	1	0	NA	NA	NA	NA	NA	NA	32.81	NA	NA	NA	NA	NA	NA	NA	NA	NA
HSA-MIR-873	31.66	33.25	1	1	-1.59	NA	31.66	NA	NA	NA	NA	NA	NA	NA	NA	NA	NA	33.25	NA	NA
HSA-MIR-874	27.555	28.19	2	1	-0.635	NA	NA	NA	28.01	NA	27.1	NA	NA	NA	NA	28.19	NA	NA	NA	NA
HSA-MIR-876-3P	NA	NA	0	0	NA	NA	NA	NA	NA	NA	NA	NA	NA	NA	NA	NA	NA	NA	NA	NA
HSA-MIR-876-5P	29.74	29.995	1	2	-0.255	NA	29.74	NA	NA	NA	NA	NA	NA	NA	NA	NA	NA	NA	29.84	30.15
HSA-MIR-885-3P	NA	NA	0	0	NA	NA	NA	NA	NA	NA	NA	NA	NA	NA	NA	NA	NA	NA	NA	NA
HSA-MIR-888	NA	NA	0	0	NA	NA	NA	NA	NA	NA	NA	NA	NA	NA	NA	NA	NA	NA	NA	NA
HSA-MIR-889	30.63	31.805	1	2	-1.175	NA	NA	NA	NA	NA	NA	NA	30.63	NA	NA	32.09	NA	NA	31.52	NA
HSA-MIR-890	NA	NA	0	0	NA	NA	NA	NA	NA	NA	NA	NA	NA	NA	NA	NA	NA	NA	NA	NA
HSA-MIR-891B	NA	30.645	0	2	NA	NA	NA	NA	NA	NA	NA	NA	NA	NA	31.32	NA	NA	NA	29.97	NA
HSA-MIR-892A	32.715	32.12	2	1	0.595	NA	32.93	NA	NA	NA	NA	NA	32.5	NA	NA	NA	NA	NA	NA	32.12
HSA-MIR-9	29.83	34.13	1	1	-4.3	NA	NA	NA	29.83	NA	NA	NA	NA	NA	NA	34.13	NA	NA	NA	NA
HSA-MIR-920	30.385	NA	2	0	NA	NA	31.15	NA	29.62	NA	NA	NA	NA	NA	NA	NA	NA	NA	NA	NA
HSA-MIR-921	NA	NA	0	0	NA	NA	NA	NA	NA	NA	NA	NA	NA	NA	NA	NA	NA	NA	NA	NA
HSA-MIR-92A-2*	NA	NA	0	0	NA	NA	NA	NA	NA	NA	NA	NA	NA	NA	NA	NA	NA	NA	NA	NA
HSA-MIR-933	NA	33.72	0	1	NA	NA	NA	NA	NA	NA	NA	NA	NA	NA	NA	NA	NA	NA	33.72	NA
HSA-MIR-937	26.02	24.77	5	1	1.25	NA	26.81	NA	25.38	NA	26.2	25.98	25.73	NA	NA	24.77	NA	NA	NA	NA
HSA-MIR-938	NA	NA	0	0	NA	NA	NA	NA	NA	NA	NA	NA	NA	NA	NA	NA	NA	NA	NA	NA
HSA-MIR-944	30.83	NA	1	0	NA	NA	NA	NA	30.83	NA	NA	NA	NA	NA	NA	NA	NA	NA	NA	NA
SCARNA5	29.02	29.56	1	1	-0.54	NA	NA	NA	29.02	NA	NA	NA	NA	NA	NA	NA	29.56	NA	NA	NA
SNORA61	28.06	28.7	2	1	-0.64	NA	NA	NA	28.1	NA	NA	28.02	NA	NA	NA	28.7	NA	NA	NA	NA
SNORD99	30.67	NA	2	0	NA	NA	NA	NA	NA	NA	29.47	31.87	NA	NA	NA	NA	NA	NA	NA	NA
HSA-MIR-3130-3P	NA	NA	0	0	NA	NA	NA	NA	NA	NA	NA	NA	NA	NA	NA	NA	NA	NA	NA	NA
HSA-MIR-1233	NA	NA	0	0	NA	NA	NA	NA	NA	NA	NA	NA	NA	NA	NA	NA	NA	NA	NA	NA
HSA-MIR-21	NA	22.03	0	1	NA	NA	NA	NA	NA	NA	NA	NA	NA	NA	NA	22.03	NA	NA	NA	NA
HSA-MIR-542-5P	NA	NA	0	0	NA	NA	NA	NA	NA	NA	NA	NA	NA	NA	NA	NA	NA	NA	NA	NA
HSA-MIR-17	NA	NA	0	0	NA	NA	NA	NA	NA	NA	NA	NA	NA	NA	NA	NA	NA	NA	NA	NA
HSA-LET-7I	23.58	24.35	1	1	-0.77	NA	NA	NA	NA	NA	NA	23.58	NA	NA	NA	24.35	NA	NA	NA	NA
HSA-MIR-20B	NA	NA	0	0	NA	NA	NA	NA	NA	NA	NA	NA	NA	NA	NA	NA	NA	NA	NA	NA
HSA-MIR-196A	NA	NA	0	0	NA	NA	NA	NA	NA	NA	NA	NA	NA	NA	NA	NA	NA	NA	NA	NA
HSA-MIR-3622A-5P	NA	NA	0	0	NA	NA	NA	NA	NA	NA	NA	NA	NA	NA	NA	NA	NA	NA	NA	NA
HSA-MIR-1825	NA	NA	0	0	NA	NA	NA	NA	NA	NA	NA	NA	NA	NA	NA	NA	NA	NA	NA	NA
HSA-MIR-223*	NA	24.09	0	1	NA	NA	NA	NA	NA	NA	NA	NA	NA	NA	NA	24.09	NA	NA	NA	NA
HSA-MIR-17*	NA	NA	0	0	NA	NA	NA	NA	NA	NA	NA	NA	NA	NA	NA	NA	NA	NA	NA	NA
HSA-MIR-3181	NA	NA	0	0	NA	NA	NA	NA	NA	NA	NA	NA	NA	NA	NA	NA	NA	NA	NA	NA
HSA-MIR-3689A-3P	NA	NA	0	0	NA	NA	NA	NA	NA	NA	NA	NA	NA	NA	NA	NA	NA	NA	NA	NA
HSA-MIR-136*	NA	NA	0	0	NA	NA	NA	NA	NA	NA	NA	NA	NA	NA	NA	NA	NA	NA	NA	NA
HSA-MIR-1271	NA	NA	0	0	NA	NA	NA	NA	NA	NA	NA	NA	NA	NA	NA	NA	NA	NA	NA	NA
HSA-MIR-1231	NA	NA	0	0	NA	NA	NA	NA	NA	NA	NA	NA	NA	NA	NA	NA	NA	NA	NA	NA
HSA-MIR-324-3P	NA	NA	0	0	NA	NA	NA	NA	NA	NA	NA	NA	NA	NA	NA	NA	NA	NA	NA	NA
HSA-MIR-3174	NA	NA	0	0	NA	NA	NA	NA	NA	NA	NA	NA	NA	NA	NA	NA	NA	NA	NA	NA
HSA-MIR-1281	24.05	NA	1	0	NA	NA	24.05	NA	NA	NA	NA	NA	NA	NA	NA	NA	NA	NA	NA	NA
HSA-MIR-575	NA	NA	0	0	NA	NA	NA	NA	NA	NA	NA	NA	NA	NA	NA	NA	NA	NA	NA	NA
HSA-MIR-3130-5P	NA	NA	0	0	NA	NA	NA	NA	NA	NA	NA	NA	NA	NA	NA	NA	NA	NA	NA	NA
HSA-MIR-197	NA	NA	0	0	NA	NA	NA	NA	NA	NA	NA	NA	NA	NA	NA	NA	NA	NA	NA	NA
HSA-MIR-610	NA	NA	0	0	NA	NA	NA	NA	NA	NA	NA	NA	NA	NA	NA	NA	NA	NA	NA	NA
HSA-MIR-657	NA	NA	0	0	NA	NA	NA	NA	NA	NA	NA	NA	NA	NA	NA	NA	NA	NA	NA	NA
HSA-MIR-216A	NA	NA	0	0	NA	NA	NA	NA	NA	NA	NA	NA	NA	NA	NA	NA	NA	NA	NA	NA
HSA-MIR-3151	NA	NA	0	0	NA	NA	NA	NA	NA	NA	NA	NA	NA	NA	NA	NA	NA	NA	NA	NA
HSA-MIR-181B	NA	NA	0	0	NA	NA	NA	NA	NA	NA	NA	NA	NA	NA	NA	NA	NA	NA	NA	NA
HSA-MIR-3192	NA	NA	0	0	NA	NA	NA	NA	NA	NA	NA	NA	NA	NA	NA	NA	NA	NA	NA	NA
HSA-MIR-4311	NA	NA	0	0	NA	NA	NA	NA	NA	NA	NA	NA	NA	NA	NA	NA	NA	NA	NA	NA
HSA-MIR-4301	25.86	25.52	2	1	0.34	NA	NA	NA	NA	NA	NA	25.87	25.85	NA	NA	NA	NA	25.52	NA	NA
HSA-MIR-133A	NA	NA	0	0	NA	NA	NA	NA	NA	NA	NA	NA	NA	NA	NA	NA	NA	NA	NA	NA
HSA-MIR-296-3P	NA	NA	0	0	NA	NA	NA	NA	NA	NA	NA	NA	NA	NA	NA	NA	NA	NA	NA	NA
HSA-MIR-556-5P	NA	NA	0	0	NA	NA	NA	NA	NA	NA	NA	NA	NA	NA	NA	NA	NA	NA	NA	NA
HSA-MIR-3137	NA	NA	0	0	NA	NA	NA	NA	NA	NA	NA	NA	NA	NA	NA	NA	NA	NA	NA	NA
HSA-MIR-3679-3P	NA	NA	0	0	NA	NA	NA	NA	NA	NA	NA	NA	NA	NA	NA	NA	NA	NA	NA	NA
HSA-MIR-122	24.4	NA	2	0	NA	NA	22.56	NA	26.24	NA	NA	NA	NA	NA	NA	NA	NA	NA	NA	NA
HSA-MIR-4265	NA	NA	0	0	NA	NA	NA	NA	NA	NA	NA	NA	NA	NA	NA	NA	NA	NA	NA	NA
HSA-MIR-20A*	NA	NA	0	0	NA	NA	NA	NA	NA	NA	NA	NA	NA	NA	NA	NA	NA	NA	NA	NA
HSA-MIR-571	NA	NA	0	0	NA	NA	NA	NA	NA	NA	NA	NA	NA	NA	NA	NA	NA	NA	NA	NA
HSA-MIR-192	25.1	NA	1	0	NA	NA	25.1	NA	NA	NA	NA	NA	NA	NA	NA	NA	NA	NA	NA	NA
HSA-MIR-4269	NA	NA	0	0	NA	NA	NA	NA	NA	NA	NA	NA	NA	NA	NA	NA	NA	NA	NA	NA
HSA-MIR-656	NA	NA	0	0	NA	NA	NA	NA	NA	NA	NA	NA	NA	NA	NA	NA	NA	NA	NA	NA
HSA-MIR-132	NA	NA	0	0	NA	NA	NA	NA	NA	NA	NA	NA	NA	NA	NA	NA	NA	NA	NA	NA
HSA-MIR-3606	NA	NA	0	0	NA	NA	NA	NA	NA	NA	NA	NA	NA	NA	NA	NA	NA	NA	NA	NA
HSA-MIR-4272	NA	NA	0	0	NA	NA	NA	NA	NA	NA	NA	NA	NA	NA	NA	NA	NA	NA	NA	NA
HSA-MIR-934	NA	NA	0	0	NA	NA	NA	NA	NA	NA	NA	NA	NA	NA	NA	NA	NA	NA	NA	NA
HSA-MIR-1184	NA	NA	0	0	NA	NA	NA	NA	NA	NA	NA	NA	NA	NA	NA	NA	NA	NA	NA	NA
HSA-MIR-593*	NA	NA	0	0	NA	NA	NA	NA	NA	NA	NA	NA	NA	NA	NA	NA	NA	NA	NA	NA
HSA-MIR-1208	NA	NA	0	0	NA	NA	NA	NA	NA	NA	NA	NA	NA	NA	NA	NA	NA	NA	NA	NA
HSA-MIR-2277-3P	NA	NA	0	0	NA	NA	NA	NA	NA	NA	NA	NA	NA	NA	NA	NA	NA	NA	NA	NA
HSA-MIR-600	NA	NA	0	0	NA	NA	NA	NA	NA	NA	NA	NA	NA	NA	NA	NA	NA	NA	NA	NA
HSA-MIR-574-3P	27.78	NA	3	0	NA	NA	NA	NA	NA	NA	27.74	27.79	27.81	NA	NA	NA	NA	NA	NA	NA
HSA-MIR-192*	NA	NA	0	0	NA	NA	NA	NA	NA	NA	NA	NA	NA	NA	NA	NA	NA	NA	NA	NA
HSA-MIR-146A*	NA	NA	0	0	NA	NA	NA	NA	NA	NA	NA	NA	NA	NA	NA	NA	NA	NA	NA	NA
HSA-MIR-1539	NA	NA	0	0	NA	NA	NA	NA	NA	NA	NA	NA	NA	NA	NA	NA	NA	NA	NA	NA
HSA-MIR-202*	NA	NA	0	0	NA	NA	NA	NA	NA	NA	NA	NA	NA	NA	NA	NA	NA	NA	NA	NA
HSA-MIR-556-3P	NA	NA	0	0	NA	NA	NA	NA	NA	NA	NA	NA	NA	NA	NA	NA	NA	NA	NA	NA
HSA-MIR-323-3P	27.97	26.39	2	1	1.58	NA	NA	NA	NA	NA	28.11	27.83	NA	NA	NA	26.39	NA	NA	NA	NA
HSA-MIR-559	NA	NA	0	0	NA	NA	NA	NA	NA	NA	NA	NA	NA	NA	NA	NA	NA	NA	NA	NA
HSA-MIR-3714	NA	NA	0	0	NA	NA	NA	NA	NA	NA	NA	NA	NA	NA	NA	NA	NA	NA	NA	NA
HSA-MIR-367*	NA	NA	0	0	NA	NA	NA	NA	NA	NA	NA	NA	NA	NA	NA	NA	NA	NA	NA	NA
HSA-MIR-3690	NA	NA	0	0	NA	NA	NA	NA	NA	NA	NA	NA	NA	NA	NA	NA	NA	NA	NA	NA
HSA-MIR-1180	NA	NA	0	0	NA	NA	NA	NA	NA	NA	NA	NA	NA	NA	NA	NA	NA	NA	NA	NA
HSA-MIR-151-3P	NA	NA	0	0	NA	NA	NA	NA	NA	NA	NA	NA	NA	NA	NA	NA	NA	NA	NA	NA
HSA-MIR-708	NA	NA	0	0	NA	NA	NA	NA	NA	NA	NA	NA	NA	NA	NA	NA	NA	NA	NA	NA
HSA-MIR-3142	NA	NA	0	0	NA	NA	NA	NA	NA	NA	NA	NA	NA	NA	NA	NA	NA	NA	NA	NA
HSA-MIR-3184	25.9067	24.47	3	1	1.43667	NA	NA	NA	25.89	NA	25.82	NA	26.01	NA	NA	24.47	NA	NA	NA	NA
HSA-MIR-544B	NA	NA	0	0	NA	NA	NA	NA	NA	NA	NA	NA	NA	NA	NA	NA	NA	NA	NA	NA
HSA-MIR-196B	NA	NA	0	0	NA	NA	NA	NA	NA	NA	NA	NA	NA	NA	NA	NA	NA	NA	NA	NA
HSA-MIR-563	NA	NA	0	0	NA	NA	NA	NA	NA	NA	NA	NA	NA	NA	NA	NA	NA	NA	NA	NA
HSA-MIR-642B	NA	NA	0	0	NA	NA	NA	NA	NA	NA	NA	NA	NA	NA	NA	NA	NA	NA	NA	NA
HSA-MIR-30A*	NA	NA	0	0	NA	NA	NA	NA	NA	NA	NA	NA	NA	NA	NA	NA	NA	NA	NA	NA
HSA-MIR-96*	NA	NA	0	0	NA	NA	NA	NA	NA	NA	NA	NA	NA	NA	NA	NA	NA	NA	NA	NA
HSA-MIR-30D*	NA	NA	0	0	NA	NA	NA	NA	NA	NA	NA	NA	NA	NA	NA	NA	NA	NA	NA	NA
HSA-MIR-296-5P	NA	NA	0	0	NA	NA	NA	NA	NA	NA	NA	NA	NA	NA	NA	NA	NA	NA	NA	NA
HSA-MIR-337-5P	NA	NA	0	0	NA	NA	NA	NA	NA	NA	NA	NA	NA	NA	NA	NA	NA	NA	NA	NA
HSA-MIR-1279	NA	NA	0	0	NA	NA	NA	NA	NA	NA	NA	NA	NA	NA	NA	NA	NA	NA	NA	NA
HSA-MIR-1276	NA	NA	0	0	NA	NA	NA	NA	NA	NA	NA	NA	NA	NA	NA	NA	NA	NA	NA	NA
HSA-MIR-615-5P	NA	NA	0	0	NA	NA	NA	NA	NA	NA	NA	NA	NA	NA	NA	NA	NA	NA	NA	NA
HSA-MIR-1267	NA	NA	0	0	NA	NA	NA	NA	NA	NA	NA	NA	NA	NA	NA	NA	NA	NA	NA	NA
HSA-MIR-338-3P	NA	NA	0	0	NA	NA	NA	NA	NA	NA	NA	NA	NA	NA	NA	NA	NA	NA	NA	NA
HSA-MIR-2116*	NA	NA	0	0	NA	NA	NA	NA	NA	NA	NA	NA	NA	NA	NA	NA	NA	NA	NA	NA
HSA-MIR-548U	NA	NA	0	0	NA	NA	NA	NA	NA	NA	NA	NA	NA	NA	NA	NA	NA	NA	NA	NA
HSA-MIR-3922	NA	NA	0	0	NA	NA	NA	NA	NA	NA	NA	NA	NA	NA	NA	NA	NA	NA	NA	NA
HSA-MIR-3938	NA	NA	0	0	NA	NA	NA	NA	NA	NA	NA	NA	NA	NA	NA	NA	NA	NA	NA	NA
HSA-MIR-32	NA	NA	0	0	NA	NA	NA	NA	NA	NA	NA	NA	NA	NA	NA	NA	NA	NA	NA	NA
HSA-MIR-875-5P	NA	NA	0	0	NA	NA	NA	NA	NA	NA	NA	NA	NA	NA	NA	NA	NA	NA	NA	NA
HSA-MIR-26B*	NA	NA	0	0	NA	NA	NA	NA	NA	NA	NA	NA	NA	NA	NA	NA	NA	NA	NA	NA
HSA-MIR-485-3P	NA	NA	0	0	NA	NA	NA	NA	NA	NA	NA	NA	NA	NA	NA	NA	NA	NA	NA	NA
HSA-MIR-487B	NA	NA	0	0	NA	NA	NA	NA	NA	NA	NA	NA	NA	NA	NA	NA	NA	NA	NA	NA
HSA-MIR-493*	33.82	30.5167	1	3	3.30333	NA	33.82	NA	NA	NA	NA	NA	NA	30.18	NA	29.93	31.44	NA	NA	NA
HSA-MIR-378B	NA	NA	0	0	NA	NA	NA	NA	NA	NA	NA	NA	NA	NA	NA	NA	NA	NA	NA	NA
HSA-MIR-130A*	NA	NA	0	0	NA	NA	NA	NA	NA	NA	NA	NA	NA	NA	NA	NA	NA	NA	NA	NA
HSA-MIR-33A*	NA	NA	0	0	NA	NA	NA	NA	NA	NA	NA	NA	NA	NA	NA	NA	NA	NA	NA	NA
HSA-MIR-4304	NA	NA	0	0	NA	NA	NA	NA	NA	NA	NA	NA	NA	NA	NA	NA	NA	NA	NA	NA
HSA-MIR-3924	NA	NA	0	0	NA	NA	NA	NA	NA	NA	NA	NA	NA	NA	NA	NA	NA	NA	NA	NA
HSA-MIR-218-1*	NA	NA	0	0	NA	NA	NA	NA	NA	NA	NA	NA	NA	NA	NA	NA	NA	NA	NA	NA
HSA-MIR-206	NA	NA	0	0	NA	NA	NA	NA	NA	NA	NA	NA	NA	NA	NA	NA	NA	NA	NA	NA
HSA-MIR-1253	31.01	31.8	1	3	-0.79	NA	NA	NA	NA	NA	NA	NA	31.01	30.3	NA	32.45	32.65	NA	NA	NA
HSA-MIR-146B-3P	NA	NA	0	0	NA	NA	NA	NA	NA	NA	NA	NA	NA	NA	NA	NA	NA	NA	NA	NA
HSA-MIR-181C	27.61	NA	1	0	NA	NA	NA	NA	NA	NA	NA	27.61	NA	NA	NA	NA	NA	NA	NA	NA
HSA-MIR-518F*	NA	NA	0	0	NA	NA	NA	NA	NA	NA	NA	NA	NA	NA	NA	NA	NA	NA	NA	NA
HSA-MIR-24-2*	NA	NA	0	0	NA	NA	NA	NA	NA	NA	NA	NA	NA	NA	NA	NA	NA	NA	NA	NA
HSA-MIR-4266	28.67	NA	1	0	NA	NA	NA	NA	NA	NA	28.67	NA	NA	NA	NA	NA	NA	NA	NA	NA
HSA-LET-7G*	NA	NA	0	0	NA	NA	NA	NA	NA	NA	NA	NA	NA	NA	NA	NA	NA	NA	NA	NA
HSA-LET-7I*	NA	NA	0	0	NA	NA	NA	NA	NA	NA	NA	NA	NA	NA	NA	NA	NA	NA	NA	NA
HSA-MIR-3647-5P	NA	NA	0	0	NA	NA	NA	NA	NA	NA	NA	NA	NA	NA	NA	NA	NA	NA	NA	NA
HSA-MIR-3942	NA	NA	0	0	NA	NA	NA	NA	NA	NA	NA	NA	NA	NA	NA	NA	NA	NA	NA	NA
HSA-MIR-548Z	NA	NA	0	0	NA	NA	NA	NA	NA	NA	NA	NA	NA	NA	NA	NA	NA	NA	NA	NA
HSA-MIR-369-5P	NA	NA	0	0	NA	NA	NA	NA	NA	NA	NA	NA	NA	NA	NA	NA	NA	NA	NA	NA
HSA-MIR-466	NA	NA	0	0	NA	NA	NA	NA	NA	NA	NA	NA	NA	NA	NA	NA	NA	NA	NA	NA
HSA-MIR-604	34.17	30.715	1	2	3.455	NA	NA	NA	NA	NA	NA	NA	34.17	30.56	30.87	NA	NA	NA	NA	NA
HSA-MIR-3180-3P	NA	NA	0	0	NA	NA	NA	NA	NA	NA	NA	NA	NA	NA	NA	NA	NA	NA	NA	NA
HSA-MIR-3614-5P	NA	30.58	0	1	NA	NA	NA	NA	NA	NA	NA	NA	NA	30.58	NA	NA	NA	NA	NA	NA
HSA-MIR-3908	NA	NA	0	0	NA	NA	NA	NA	NA	NA	NA	NA	NA	NA	NA	NA	NA	NA	NA	NA
HSA-MIR-525-5P	NA	NA	0	0	NA	NA	NA	NA	NA	NA	NA	NA	NA	NA	NA	NA	NA	NA	NA	NA
HSA-MIR-99A*	NA	NA	0	0	NA	NA	NA	NA	NA	NA	NA	NA	NA	NA	NA	NA	NA	NA	NA	NA
HSA-MIR-151-5P	NA	NA	0	0	NA	NA	NA	NA	NA	NA	NA	NA	NA	NA	NA	NA	NA	NA	NA	NA
HSA-MIR-503	NA	NA	0	0	NA	NA	NA	NA	NA	NA	NA	NA	NA	NA	NA	NA	NA	NA	NA	NA
HSA-MIR-1298	NA	NA	0	0	NA	NA	NA	NA	NA	NA	NA	NA	NA	NA	NA	NA	NA	NA	NA	NA
HSA-MIR-153	NA	NA	0	0	NA	NA	NA	NA	NA	NA	NA	NA	NA	NA	NA	NA	NA	NA	NA	NA
HSA-MIR-218	NA	NA	0	0	NA	NA	NA	NA	NA	NA	NA	NA	NA	NA	NA	NA	NA	NA	NA	NA
HSA-MIR-496	NA	NA	0	0	NA	NA	NA	NA	NA	NA	NA	NA	NA	NA	NA	NA	NA	NA	NA	NA
HSA-MIR-188-5P	NA	NA	0	0	NA	NA	NA	NA	NA	NA	NA	NA	NA	NA	NA	NA	NA	NA	NA	NA
HSA-MIR-922	NA	NA	0	0	NA	NA	NA	NA	NA	NA	NA	NA	NA	NA	NA	NA	NA	NA	NA	NA
HSA-MIR-2117	NA	NA	0	0	NA	NA	NA	NA	NA	NA	NA	NA	NA	NA	NA	NA	NA	NA	NA	NA
HSA-MIR-659	NA	NA	0	0	NA	NA	NA	NA	NA	NA	NA	NA	NA	NA	NA	NA	NA	NA	NA	NA
HSA-MIR-576-5P	NA	NA	0	0	NA	NA	NA	NA	NA	NA	NA	NA	NA	NA	NA	NA	NA	NA	NA	NA
HSA-MIR-33B	NA	NA	0	0	NA	NA	NA	NA	NA	NA	NA	NA	NA	NA	NA	NA	NA	NA	NA	NA
HSA-MIR-1288	NA	NA	0	0	NA	NA	NA	NA	NA	NA	NA	NA	NA	NA	NA	NA	NA	NA	NA	NA
HSA-MIR-376A*	NA	NA	0	0	NA	NA	NA	NA	NA	NA	NA	NA	NA	NA	NA	NA	NA	NA	NA	NA
HSA-MIR-4255	NA	NA	0	0	NA	NA	NA	NA	NA	NA	NA	NA	NA	NA	NA	NA	NA	NA	NA	NA
HSA-MIR-3134	NA	NA	0	0	NA	NA	NA	NA	NA	NA	NA	NA	NA	NA	NA	NA	NA	NA	NA	NA
HSA-MIR-1301	NA	NA	0	0	NA	NA	NA	NA	NA	NA	NA	NA	NA	NA	NA	NA	NA	NA	NA	NA
HSA-MIR-2355-5P	NA	NA	0	0	NA	NA	NA	NA	NA	NA	NA	NA	NA	NA	NA	NA	NA	NA	NA	NA
HSA-MIR-641	28.8	28.57	1	1	0.23	NA	NA	NA	NA	28.8	NA	NA	NA	NA	NA	28.57	NA	NA	NA	NA
HSA-MIR-520D-5P	29.64	NA	1	0	NA	NA	NA	NA	NA	NA	NA	NA	29.64	NA	NA	NA	NA	NA	NA	NA
HSA-MIR-375	NA	NA	0	0	NA	NA	NA	NA	NA	NA	NA	NA	NA	NA	NA	NA	NA	NA	NA	NA
HSA-MIR-302D*	26.04	NA	2	0	NA	NA	NA	NA	NA	NA	26.44	NA	25.64	NA	NA	NA	NA	NA	NA	NA
HSA-MIR-3138	NA	NA	0	0	NA	NA	NA	NA	NA	NA	NA	NA	NA	NA	NA	NA	NA	NA	NA	NA
HSA-LET-7D*	NA	NA	0	0	NA	NA	NA	NA	NA	NA	NA	NA	NA	NA	NA	NA	NA	NA	NA	NA
HSA-MIR-1244	NA	NA	0	0	NA	NA	NA	NA	NA	NA	NA	NA	NA	NA	NA	NA	NA	NA	NA	NA
HSA-MIR-3671	NA	NA	0	0	NA	NA	NA	NA	NA	NA	NA	NA	NA	NA	NA	NA	NA	NA	NA	NA
HSA-MIR-98	NA	NA	0	0	NA	NA	NA	NA	NA	NA	NA	NA	NA	NA	NA	NA	NA	NA	NA	NA
HSA-MIR-2355-3P	NA	NA	0	0	NA	NA	NA	NA	NA	NA	NA	NA	NA	NA	NA	NA	NA	NA	NA	NA
HSA-MIR-582-5P	NA	NA	0	0	NA	NA	NA	NA	NA	NA	NA	NA	NA	NA	NA	NA	NA	NA	NA	NA
HSA-MIR-626	NA	NA	0	0	NA	NA	NA	NA	NA	NA	NA	NA	NA	NA	NA	NA	NA	NA	NA	NA
HSA-LET-7A*	NA	NA	0	0	NA	NA	NA	NA	NA	NA	NA	NA	NA	NA	NA	NA	NA	NA	NA	NA
HSA-MIR-211	28.24	NA	1	0	NA	NA	NA	NA	NA	NA	28.24	NA	NA	NA	NA	NA	NA	NA	NA	NA
HSA-MIR-4268	NA	NA	0	0	NA	NA	NA	NA	NA	NA	NA	NA	NA	NA	NA	NA	NA	NA	NA	NA
HSA-MIR-625*	NA	NA	0	0	NA	NA	NA	NA	NA	NA	NA	NA	NA	NA	NA	NA	NA	NA	NA	NA
HSA-MIR-522	NA	33.125	0	2	NA	NA	NA	NA	NA	NA	NA	NA	NA	31.41	NA	NA	34.84	NA	NA	NA
HSA-MIR-191*	NA	NA	0	0	NA	NA	NA	NA	NA	NA	NA	NA	NA	NA	NA	NA	NA	NA	NA	NA
HSA-MIR-661	NA	NA	0	0	NA	NA	NA	NA	NA	NA	NA	NA	NA	NA	NA	NA	NA	NA	NA	NA
HSA-MIR-939	NA	NA	0	0	NA	NA	NA	NA	NA	NA	NA	NA	NA	NA	NA	NA	NA	NA	NA	NA
HSA-MIR-1323	NA	NA	0	0	NA	NA	NA	NA	NA	NA	NA	NA	NA	NA	NA	NA	NA	NA	NA	NA
HSA-MIR-574-5P	26.67	NA	1	0	NA	NA	26.67	NA	NA	NA	NA	NA	NA	NA	NA	NA	NA	NA	NA	NA
HSA-MIR-1297	33.01	31.5	2	1	1.51	NA	34.28	NA	NA	NA	NA	NA	31.74	31.5	NA	NA	NA	NA	NA	NA
HSA-MIR-3074	NA	NA	0	0	NA	NA	NA	NA	NA	NA	NA	NA	NA	NA	NA	NA	NA	NA	NA	NA
HSA-MIR-599	27.48	NA	2	0	NA	NA	NA	NA	NA	NA	27.93	NA	27.03	NA	NA	NA	NA	NA	NA	NA
HSA-MIR-362-3P	NA	NA	0	0	NA	NA	NA	NA	NA	NA	NA	NA	NA	NA	NA	NA	NA	NA	NA	NA
HSA-MIR-4318	NA	NA	0	0	NA	NA	NA	NA	NA	NA	NA	NA	NA	NA	NA	NA	NA	NA	NA	NA
HSA-MIR-554	NA	NA	0	0	NA	NA	NA	NA	NA	NA	NA	NA	NA	NA	NA	NA	NA	NA	NA	NA
HSA-MIR-516A-5P	NA	NA	0	0	NA	NA	NA	NA	NA	NA	NA	NA	NA	NA	NA	NA	NA	NA	NA	NA
HSA-MIR-377	NA	NA	0	0	NA	NA	NA	NA	NA	NA	NA	NA	NA	NA	NA	NA	NA	NA	NA	NA
HSA-MIR-624*	NA	NA	0	0	NA	NA	NA	NA	NA	NA	NA	NA	NA	NA	NA	NA	NA	NA	NA	NA
HSA-MIR-452*	NA	NA	0	0	NA	NA	NA	NA	NA	NA	NA	NA	NA	NA	NA	NA	NA	NA	NA	NA
HSA-MIR-500A	30.064	29.94	5	1	0.124	NA	NA	NA	29.91	30.91	29.72	29.57	30.21	NA	NA	29.94	NA	NA	NA	NA
HSA-MIR-507	NA	NA	0	0	NA	NA	NA	NA	NA	NA	NA	NA	NA	NA	NA	NA	NA	NA	NA	NA
HSA-MIR-337-3P	NA	NA	0	0	NA	NA	NA	NA	NA	NA	NA	NA	NA	NA	NA	NA	NA	NA	NA	NA
HSA-MIR-4270	29.09	NA	2	0	NA	NA	28.81	NA	NA	NA	NA	29.37	NA	NA	NA	NA	NA	NA	NA	NA
HSA-MIR-545	NA	NA	0	0	NA	NA	NA	NA	NA	NA	NA	NA	NA	NA	NA	NA	NA	NA	NA	NA
HSA-MIR-543	NA	NA	0	0	NA	NA	NA	NA	NA	NA	NA	NA	NA	NA	NA	NA	NA	NA	NA	NA
HSA-MIR-569	NA	NA	0	0	NA	NA	NA	NA	NA	NA	NA	NA	NA	NA	NA	NA	NA	NA	NA	NA
HSA-MIR-320E	NA	NA	0	0	NA	NA	NA	NA	NA	NA	NA	NA	NA	NA	NA	NA	NA	NA	NA	NA
HSA-MIR-302F	NA	NA	0	0	NA	NA	NA	NA	NA	NA	NA	NA	NA	NA	NA	NA	NA	NA	NA	NA
HSA-MIR-409-3P	NA	NA	0	0	NA	NA	NA	NA	NA	NA	NA	NA	NA	NA	NA	NA	NA	NA	NA	NA
HSA-MIR-302D	NA	NA	0	0	NA	NA	NA	NA	NA	NA	NA	NA	NA	NA	NA	NA	NA	NA	NA	NA
HSA-MIR-329	32.82	31.4167	1	3	1.40333	NA	NA	NA	NA	NA	NA	32.82	NA	31.99	NA	31.36	NA	NA	30.9	NA
HSA-MIR-518E*	NA	NA	0	0	NA	NA	NA	NA	NA	NA	NA	NA	NA	NA	NA	NA	NA	NA	NA	NA
HSA-MIR-524-5P	NA	29.54	0	1	NA	NA	NA	NA	NA	NA	NA	NA	NA	NA	NA	29.54	NA	NA	NA	NA
HSA-MIR-199A-3P	NA	NA	0	0	NA	NA	NA	NA	NA	NA	NA	NA	NA	NA	NA	NA	NA	NA	NA	NA
HSA-MIR-302A	NA	NA	0	0	NA	NA	NA	NA	NA	NA	NA	NA	NA	NA	NA	NA	NA	NA	NA	NA
HSA-MIR-340	NA	28.08	0	1	NA	NA	NA	NA	NA	NA	NA	NA	NA	NA	NA	28.08	NA	NA	NA	NA
HSA-MIR-100	NA	NA	0	0	NA	NA	NA	NA	NA	NA	NA	NA	NA	NA	NA	NA	NA	NA	NA	NA
HSA-MIR-4282	NA	NA	0	0	NA	NA	NA	NA	NA	NA	NA	NA	NA	NA	NA	NA	NA	NA	NA	NA
HSA-MIR-147	NA	NA	0	0	NA	NA	NA	NA	NA	NA	NA	NA	NA	NA	NA	NA	NA	NA	NA	NA
HSA-MIR-639	NA	NA	0	0	NA	NA	NA	NA	NA	NA	NA	NA	NA	NA	NA	NA	NA	NA	NA	NA
HSA-MIR-577	29.61	32.06	1	3	-2.45	NA	NA	NA	NA	NA	NA	NA	29.61	32.19	NA	30.68	33.31	NA	NA	NA
HSA-MIR-520C-3P	30.29	32.145	1	4	-1.855	NA	30.29	NA	NA	NA	NA	NA	NA	32.22	31.32	34.03	31.01	NA	NA	NA
HSA-MIR-525-3P	NA	NA	0	0	NA	NA	NA	NA	NA	NA	NA	NA	NA	NA	NA	NA	NA	NA	NA	NA
HSA-MIR-566	NA	NA	0	0	NA	NA	NA	NA	NA	NA	NA	NA	NA	NA	NA	NA	NA	NA	NA	NA
HSA-MIR-3652	30.26	NA	1	0	NA	NA	NA	NA	NA	NA	30.26	NA	NA	NA	NA	NA	NA	NA	NA	NA
HSA-MIR-4296	NA	NA	0	0	NA	NA	NA	NA	NA	NA	NA	NA	NA	NA	NA	NA	NA	NA	NA	NA
HSA-MIR-633	NA	NA	0	0	NA	NA	NA	NA	NA	NA	NA	NA	NA	NA	NA	NA	NA	NA	NA	NA
HSA-MIR-365*	34.82	32.35	1	1	2.47	NA	NA	NA	NA	NA	NA	NA	34.82	32.35	NA	NA	NA	NA	NA	NA
HSA-MIR-1914*	NA	NA	0	0	NA	NA	NA	NA	NA	NA	NA	NA	NA	NA	NA	NA	NA	NA	NA	NA
HSA-MIR-485-5P	NA	NA	0	0	NA	NA	NA	NA	NA	NA	NA	NA	NA	NA	NA	NA	NA	NA	NA	NA
HSA-MIR-564	NA	NA	0	0	NA	NA	NA	NA	NA	NA	NA	NA	NA	NA	NA	NA	NA	NA	NA	NA
HSA-MIR-802	32.13	32.075	1	2	0.055	NA	NA	NA	NA	32.13	NA	NA	NA	32.6	NA	NA	NA	NA	31.55	NA
HSA-MIR-4279	NA	NA	0	0	NA	NA	NA	NA	NA	NA	NA	NA	NA	NA	NA	NA	NA	NA	NA	NA
HSA-MIR-18A	NA	29.34	0	1	NA	NA	NA	NA	NA	NA	NA	NA	NA	NA	NA	29.34	NA	NA	NA	NA
HSA-MIR-3194	NA	NA	0	0	NA	NA	NA	NA	NA	NA	NA	NA	NA	NA	NA	NA	NA	NA	NA	NA
HSA-MIR-454*	NA	NA	0	0	NA	NA	NA	NA	NA	NA	NA	NA	NA	NA	NA	NA	NA	NA	NA	NA
HSA-MIR-606	NA	NA	0	0	NA	NA	NA	NA	NA	NA	NA	NA	NA	NA	NA	NA	NA	NA	NA	NA
HSA-MIR-526A	NA	NA	0	0	NA	NA	NA	NA	NA	NA	NA	NA	NA	NA	NA	NA	NA	NA	NA	NA
HSA-MIR-1247	NA	NA	0	0	NA	NA	NA	NA	NA	NA	NA	NA	NA	NA	NA	NA	NA	NA	NA	NA
HSA-MIR-622	NA	NA	0	0	NA	NA	NA	NA	NA	NA	NA	NA	NA	NA	NA	NA	NA	NA	NA	NA
HSA-MIR-3653	28.11	27.6	1	1	0.51	NA	NA	NA	28.11	NA	NA	NA	NA	NA	NA	27.6	NA	NA	NA	NA
HSA-MIR-548C-3P	NA	NA	0	0	NA	NA	NA	NA	NA	NA	NA	NA	NA	NA	NA	NA	NA	NA	NA	NA
HSA-MIR-4287	34.07	33.2	1	1	0.87	NA	NA	NA	NA	NA	34.07	NA	NA	33.2	NA	NA	NA	NA	NA	NA
HSA-MIR-3123	NA	NA	0	0	NA	NA	NA	NA	NA	NA	NA	NA	NA	NA	NA	NA	NA	NA	NA	NA
HSA-MIR-580	NA	NA	0	0	NA	NA	NA	NA	NA	NA	NA	NA	NA	NA	NA	NA	NA	NA	NA	NA
HSA-MIR-517C	NA	NA	0	0	NA	NA	NA	NA	NA	NA	NA	NA	NA	NA	NA	NA	NA	NA	NA	NA
HSA-MIR-515-3P	NA	NA	0	0	NA	NA	NA	NA	NA	NA	NA	NA	NA	NA	NA	NA	NA	NA	NA	NA
HSA-MIR-196A*	NA	NA	0	0	NA	NA	NA	NA	NA	NA	NA	NA	NA	NA	NA	NA	NA	NA	NA	NA
HSA-MIR-504	NA	NA	0	0	NA	NA	NA	NA	NA	NA	NA	NA	NA	NA	NA	NA	NA	NA	NA	NA
HSA-MIR-20B*	29.57	29.31	1	1	0.26	NA	NA	NA	NA	NA	NA	NA	29.57	NA	29.31	NA	NA	NA	NA	NA
HSA-MIR-744*	NA	NA	0	0	NA	NA	NA	NA	NA	NA	NA	NA	NA	NA	NA	NA	NA	NA	NA	NA
HSA-MIR-301A	NA	NA	0	0	NA	NA	NA	NA	NA	NA	NA	NA	NA	NA	NA	NA	NA	NA	NA	NA
HSA-MIR-3121	32.99	33.84	2	1	-0.85	NA	NA	NA	NA	33.52	NA	32.46	NA	33.84	NA	NA	NA	NA	NA	NA
HSA-MIR-3144-5P	NA	33.89	0	1	NA	NA	NA	NA	NA	NA	NA	NA	NA	33.89	NA	NA	NA	NA	NA	NA
HSA-MIR-488	NA	33.255	0	2	NA	NA	NA	NA	NA	NA	NA	NA	NA	33.9	NA	NA	NA	NA	NA	32.61
HSA-MIR-3669	NA	NA	0	0	NA	NA	NA	NA	NA	NA	NA	NA	NA	NA	NA	NA	NA	NA	NA	NA
HSA-MIR-769-5P	NA	NA	0	0	NA	NA	NA	NA	NA	NA	NA	NA	NA	NA	NA	NA	NA	NA	NA	NA
HSA-MIR-1295	NA	NA	0	0	NA	NA	NA	NA	NA	NA	NA	NA	NA	NA	NA	NA	NA	NA	NA	NA
HSA-MIR-548X	32.47	34.23	1	1	-1.76	NA	NA	NA	NA	NA	NA	32.47	NA	34.23	NA	NA	NA	NA	NA	NA
HSA-MIR-509-3-5P	30.39	33.844	1	5	-3.454	NA	NA	NA	NA	NA	NA	30.39	NA	34.25	33.87	NA	34.24	32.26	34.6	NA
HSA-MIR-1270	NA	33.4067	0	3	NA	NA	NA	NA	NA	NA	NA	NA	NA	34.35	NA	33.12	NA	NA	NA	32.75
HSA-MIR-3065-5P	NA	NA	0	0	NA	NA	NA	NA	NA	NA	NA	NA	NA	NA	NA	NA	NA	NA	NA	NA
HSA-MIR-216B	NA	NA	0	0	NA	NA	NA	NA	NA	NA	NA	NA	NA	NA	NA	NA	NA	NA	NA	NA
HSA-MIR-935	30.83	32.9933	1	3	-2.16333	NA	NA	NA	NA	NA	NA	30.83	NA	34.54	NA	NA	30.97	NA	NA	33.47
HSA-MIR-615-3P	NA	NA	0	0	NA	NA	NA	NA	NA	NA	NA	NA	NA	NA	NA	NA	NA	NA	NA	NA
HSA-MIR-212	NA	NA	0	0	NA	NA	NA	NA	NA	NA	NA	NA	NA	NA	NA	NA	NA	NA	NA	NA
HSA-MIR-1238	NA	NA	0	0	NA	NA	NA	NA	NA	NA	NA	NA	NA	NA	NA	NA	NA	NA	NA	NA
HSA-MIR-520G	NA	NA	0	0	NA	NA	NA	NA	NA	NA	NA	NA	NA	NA	NA	NA	NA	NA	NA	NA
HSA-MIR-3139	NA	NA	0	0	NA	NA	NA	NA	NA	NA	NA	NA	NA	NA	NA	NA	NA	NA	NA	NA

## Sheet: GN Cq´s 
miRNA	T21 Mean	C Mean	Number identified in T21	Number identified in C	Difference	p Value	K1_T21_f	41_T21_f	42_T21_f	102_T21_m	109_T21_f	107_T21_m	108_T21_m	21_C_m	61_C_f	74_C_f	84_C_f	72_C_f	68_C_m	87_C_m
HSA-MIR-888*	30.5829	34.6744	2	3	-4.09149	0.00428182	30.3693	NA	NA	30.7964	NA	NA	NA	NA	NA	35.5173	NA	34.2089	NA	34.2969
HSA-MIR-483-5P	31.8042	33.8202	4	5	-2.01604	0.0045382	31.8121	31.9525	NA	NA	31.6592	NA	31.793	34.99	33.6716	32.7828	NA	33.5604	NA	34.0963
HSA-MIR-512-5P	30.9744	33.6636	3	5	-2.6892	0.00860679	31.4287	NA	30.8265	NA	30.6679	NA	NA	NA	33.6418	35.022	33.2284	34.7662	NA	31.6594
HSA-MIR-181A*	33.5454	30.7907	4	2	2.75474	0.0186376	NA	NA	NA	33.4489	31.8694	33.9822	34.8812	NA	NA	31.1318	NA	30.4496	NA	NA
HSA-MIR-518C*	31.3456	35.036	4	2	-3.69032	0.0199035	NA	33.4332	NA	NA	31.8594	30.5346	29.5554	34.87	NA	NA	NA	35.2019	NA	NA
HSA-MIR-3918	27.6603	28.3878	5	3	-0.727464	0.0235979	27.3122	NA	27.696	NA	27.484	28.1675	27.6417	NA	NA	28.0671	NA	28.6358	NA	28.4604
HSA-MIR-362-5P	31.938	34.5375	4	2	-2.59947	0.0249483	33.0128	33.0505	NA	NA	NA	31.1006	30.5881	34.16	NA	NA	34.9149	NA	NA	NA
HSA-MIR-498	34.4236	31.4486	3	4	2.97504	0.0293386	33.0632	NA	NA	NA	NA	35.0936	35.1141	NA	31.5734	NA	31.9635	NA	30.4376	31.8199
HSA-MIR-3676	33.5122	31.3979	3	3	2.1143	0.0296452	34.3042	32.7281	NA	NA	NA	NA	33.5042	NA	31.0463	NA	31.4716	31.6757	NA	NA
HSA-MIR-500A	30.5839	31.4038	6	4	-0.819877	0.0298552	31.6204	NA	30.3996	30.707	29.7568	30.4316	30.5881	31.74	NA	30.8945	31.6322	NA	NA	31.3486
HSA-MIR-195*	29.3464	30.5783	5	6	-1.23187	0.0337234	NA	NA	29.8609	28.4122	28.8657	29.2584	30.335	29.89	NA	30.6571	30.0762	31.4223	31.7705	29.6538
HSA-MIR-124*	31.7184	33.3183	4	3	-1.59993	0.0363475	32.9926	30.7336	NA	NA	31.4189	31.7284	NA	33.47	33.5324	NA	NA	32.9524	NA	NA
RNU12	28.2214	29.3426	6	5	-1.12117	0.0380578	NA	28.2556	27.9603	28.6804	29.2762	27.2207	27.9353	NA	29.9624	29.6975	NA	29.7909	29.243	28.0192
HSA-MIR-30C	27.0495	28.0712	7	7	-1.0217	0.0420342	25.9602	28.1649	27.259	27.8757	27.1236	25.5947	27.3683	28.61	28.789	27.3654	28.3094	26.9132	28.5223	27.9891
HSA-MIR-200C	32.2145	30.5272	5	7	1.68724	0.04393	32.7605	NA	32.3713	31.7203	33.912	30.3081	NA	30.36	29.6243	30.8841	30.8793	31.2805	31.1189	29.5435
HSA-MIR-627	33.3617	31.9654	4	7	1.39632	0.0451849	34.0116	NA	34.1398	NA	NA	33.1074	32.1879	32.05	31.2552	32.0295	33.1079	31.3717	31.0103	32.933
HSA-MIR-219-5P	31.4155	33.6532	2	4	-2.23771	0.0503931	31.913	NA	30.9179	NA	NA	NA	NA	NA	32.0905	33.856	34.0014	34.6649	NA	NA
HSA-MIR-4328	32.4509	31.5687	4	2	0.88219	0.0505709	NA	NA	32.5543	31.919	32.1197	NA	33.2105	31.5	NA	31.6374	NA	NA	NA	NA
HSA-MIR-93*	29.5059	30.7645	6	5	-1.25854	0.059141	28.0588	29.9479	28.56	NA	29.2562	29.845	31.3678	NA	NA	29.8832	30.6384	30.9056	31.8791	30.5162
HSA-MIR-3913	32.1539	33.8044	4	2	-1.65053	0.0627837	NA	NA	NA	31.7303	33.3012	32.4796	31.1045	NA	NA	33.4122	NA	NA	NA	34.1966
HSA-MIR-486-5P	22.3586	21.2529	7	7	1.1057	0.0661397	21.3796	21.5971	21.9027	23.6437	23.6493	20.6754	23.6625	21.45	21.7384	21.1638	20.5092	21.5528	21.8582	20.4979
HSA-MIR-605	33.9112	32.293	4	3	1.61822	0.0750725	NA	34.2996	34.3228	NA	NA	34.7232	32.2993	32.58	NA	NA	32.9272	31.3717	NA	NA
HSA-MIR-155	32.5201	31.2146	6	5	1.30544	0.0753041	35.2022	31.7208	32.1681	NA	31.7493	32.9427	31.3374	NA	NA	31.235	31.3913	31.6351	30.7239	31.0878
HSA-MIR-943	32.4379	31.0318	6	6	1.40609	0.0758089	31.8525	31.2574	32.6864	30.6474	NA	33.8896	34.2939	31.39	30.4198	29.7491	30.9596	32.2634	NA	31.4087
HSA-MIR-1249	27.2259	29.3228	2	6	-2.0969	0.0764949	26.7371	NA	NA	NA	NA	27.7147	NA	32.21	27.9735	28.5211	NA	27.5009	31.652	28.0793
HSA-MIR-3660	32.0947	34.2941	2	2	-2.19945	0.0776941	32.5386	NA	NA	31.6508	NA	NA	NA	33.82	NA	NA	NA	NA	NA	34.7682
HSA-MIR-410	33.348	31.2748	5	3	2.07323	0.0789463	NA	NA	33.3775	34.3628	33.171	32.9119	32.9169	NA	NA	30.8945	NA	30.3179	NA	32.6121
HSA-MIR-611	33.5289	31.6153	6	4	1.9136	0.0808925	33.2953	NA	35.0139	31.1541	34.6028	34.9804	32.1272	NA	32.9954	NA	NA	31.9999	29.7564	31.7096
HSA-MIR-623	34.029	31.9577	6	3	2.07131	0.0812644	33.7291	NA	34.2313	34.7006	33.3713	34.4247	33.7168	30.64	NA	NA	NA	32.8916	NA	32.3414
HSA-MIR-187	31.7802	32.8543	7	5	-1.07405	0.0827879	31.6406	32.0834	31.8632	30.9057	32.6905	31.7284	31.55	34.53	32.3888	32.2462	33.1682	NA	31.9383	NA
HSA-MIR-3157	32.772	31.1916	4	4	1.58049	0.0856358	33.5879	31.3682	32.5441	33.588	NA	NA	NA	30.3	31.1657	NA	30.528	NA	NA	32.7726
HSA-MIR-629	31.6026	30.6617	7	7	0.940869	0.0876331	30.6417	31.892	32.6966	33.3297	30.738	30.3905	31.5298	30.94	30.7977	31.3588	31.4415	30.0949	30.5561	29.4432
HSA-MIR-7	31.0299	29.7225	7	7	1.30738	0.0878322	30.561	32.1539	29.7288	30.6673	33.4514	28.6409	32.0057	29.03	29.9425	29.3776	30.0862	30.2571	30.7832	28.5807
HSA-MIR-4270	29.945	30.4556	6	4	-0.510609	0.0929245	29.0678	30.2904	NA	29.6838	30.0872	30.2258	30.3148	NA	30.1414	30.8635	NA	30.6421	NA	30.1753
HSA-MIR-3680*	32.0224	29.789	3	2	2.23346	0.0940206	NA	33.0404	NA	32.5747	NA	30.4522	NA	NA	NA	NA	30.1967	NA	29.3813	NA
HSA-MIR-138	34.1933	31.6632	3	2	2.53002	0.0947829	NA	NA	33.8959	33.4787	NA	NA	35.2052	NA	32.359	NA	NA	NA	NA	30.9675
HSA-MIR-18B*	30.9357	33.4484	4	4	-2.51276	0.0986378	NA	31.056	NA	31.3925	30.698	30.5963	NA	NA	31.0662	35.8372	NA	NA	32.3628	34.5275
HSA-MIR-589*	31.7369	33.8685	2	2	-2.13163	0.103262	31.7516	NA	NA	NA	NA	NA	31.7221	NA	NA	NA	NA	34.219	33.5179	NA
HSA-MIR-411	33.0326	32.2421	3	3	0.790559	0.105726	33.043	NA	32.6458	33.4092	NA	NA	NA	NA	NA	32.143	31.7828	32.8004	NA	NA
HSA-MIR-421	30.8066	31.8894	6	6	-1.08273	0.107068	31.5296	30.7034	30.8366	30.3196	29.887	31.5637	NA	NA	34.328	31.9883	30.9596	31.1488	30.9313	31.9804
HSA-MIR-3156	32.5888	33.6171	5	2	-1.02825	0.107169	33.0329	31.2574	32.29	34.2238	NA	32.14	NA	NA	NA	33.6393	NA	NA	NA	33.5949
HSA-MIR-660	28.5218	27.6547	6	5	0.867141	0.107515	28.5734	29.4039	27.5233	NA	28.8857	27.159	29.5857	NA	28.4111	27.6131	27.2051	28.0379	NA	27.0063
HSA-MIR-3907	30.411	29.5254	6	7	0.885585	0.109135	28.6844	31.1365	31.1314	30.9256	NA	29.4128	31.1754	30.25	29.3458	29.8316	28.8916	28.9803	29.8551	29.5234
HSA-MIR-558	33.3779	30.8379	2	2	2.53997	0.110988	33.4062	NA	NA	33.3495	NA	NA	NA	31.29	NA	NA	NA	NA	NA	30.3858
HSA-MIR-574-3P	28.4331	29.1092	4	3	-0.6761	0.11154	NA	NA	29.2003	NA	27.7744	28.5998	28.1581	NA	NA	29.2744	NA	29.0614	NA	28.9919
HSA-MIR-3667-5P	31.3907	33.2514	2	3	-1.8607	0.114042	NA	NA	30.8163	NA	NA	31.9651	NA	NA	NA	NA	NA	34.2596	32.4813	33.0133
HSA-MIR-29A*	31.2441	32.574	5	5	-1.32989	0.116108	32.2359	NA	32.3917	29.6937	31.0785	NA	30.821	NA	32.0507	31.3175	32.2948	34.6953	NA	32.5119
HSA-MIR-215	30.3902	31.6248	2	3	-1.23452	0.117138	30.3189	30.4616	NA	NA	NA	NA	NA	NA	NA	32.2772	30.7087	31.8885	NA	NA
HSA-MIR-25	24.3378	23.5363	7	7	0.801473	0.117665	23.3571	24.1759	23.9456	25.4816	25.051	22.9086	25.4445	24.12	23.8466	23.0935	22.6977	24.0759	24.3165	22.6039
HSA-MIR-92A	22.9703	22.0868	7	7	0.883491	0.120662	21.8841	21.9698	22.8683	24.5477	24.1799	21.4267	23.9156	22.13	22.6533	22.0616	21.3826	22.1608	22.6184	21.601
HSA-MIR-190	31.1578	32.4775	7	6	-1.31966	0.123073	31.0453	30.9552	32.8592	31.5614	30.2174	29.2276	32.2385	34.36	34.3081	31.6065	32.104	31.9695	30.5166	NA
HSA-MIR-3939	32.8741	31.0302	6	3	1.84393	0.12417	32.932	NA	33.7333	33.8065	31.7092	32.5414	32.522	NA	NA	31.1731	NA	NA	32.2937	29.6237
HSA-MIR-106B*	27.29	28.0126	2	4	-0.722625	0.126335	27.5342	NA	NA	NA	NA	27.0458	NA	NA	27.9437	28.6037	NA	27.7947	NA	27.7083
HSA-MIR-181A	31.1422	31.6777	7	7	-0.535551	0.126506	31.1765	30.7135	31.6192	31.5018	31.3688	30.3184	31.2969	31.38	33.065	31.0492	32.1542	31.169	31.2669	31.6594
HSA-MIR-27B	27.8142	28.6341	7	7	-0.819857	0.128156	27.857	28.4772	27.4623	28.5711	27.4139	28.147	26.7709	29.94	30.3204	27.4583	28.0383	27.4604	28.6704	28.5507
HSA-MIR-92B	27.7627	27.0809	7	7	0.681812	0.130018	27.1407	27.762	28.5091	28.5413	28.3751	25.8726	28.1378	26.86	27.9636	26.8805	26.4924	27.1564	27.3573	26.8559
HSA-MIR-551A	30.2949	31.26	6	5	-0.96507	0.134945	30.2482	NA	29.678	30.25	30.1673	31.1315	30.2945	NA	29.9624	30.9667	30.7087	32.9727	NA	31.6895
HSA-MIR-4289	28.3028	27.2933	7	6	1.00956	0.137951	28.9871	29.2226	27.32	29.4851	29.0059	26.3563	27.743	28.69	28.6995	26.5503	26.4723	26.8929	NA	26.4547
HSA-MIR-885-5P	30.2549	31.9589	7	4	-1.70401	0.138659	26.7674	33.947	30.8163	32.7833	29.5966	29.351	28.5226	32.2	NA	NA	31.0801	31.4325	33.123	NA
HSA-MIR-1224-5P	32.7865	31.2778	4	3	1.50864	0.142082	NA	32.9296	34.8411	32.0481	NA	31.327	NA	NA	31.9314	NA	31.0399	NA	30.8622	NA
HSA-MIR-93	25.8374	24.9963	7	7	0.841095	0.143183	25.2035	26.2006	25.3787	27.0313	26.3426	24.3288	26.3761	25.05	25.4377	24.2079	24.3541	25.4743	26.8835	23.5666
HSA-MIR-1228*	25.6235	26.0838	7	7	-0.46039	0.146556	25.819	26.0495	24.7791	26.326	25.2913	25.5535	25.5458	26.69	25.8852	25.5287	26.1209	25.15	26.6169	26.5951
[truncated: 981 more rows]

[truncated: 3 more sheets: QN Cq´s, Raw NRQs, GN NRQs]
