# Supplementary material for: Differentially Expressed MicroRNAs in Maternal Plasma for the Noninvasive Prenatal Diagnosis of Down Syndrome (Trisomy 21)
Source: Biomed Res Int. 2014 Nov 12;2014:402475. doi: 10.1155/2014/402475 (PMC4244954; doi:10.1155/2014/402475)
Supplement: Supplementary file 1 — Supplement 1 provides an overview of the HT-qPCR results and bioinformatical analysis. [file 402475.f1.zip › Supplementary_Table_2_Predicted_miRNA_Target_Gene_Union_2738_1097286.xlsx]

## Sheet: miRNA Target pathways
	Union of Genes								Pathway Union
No.	KEGG pathway	p-value	#genes	#miRNAs
1	Long-term depression	5.61112e-07	36	23
2	TGF-beta signaling pathway	9.90583e-07	40	21
3	Glioma	1.04991e-06	35	21
4	Wnt signaling pathway	1.06954e-06	74	22
5	Pathways in cancer	3.35485e-06	138	29
6	Endocytosis	1.1266e-05	95	26
7	Long-term potentiation	2.41821e-05	41	22
8	Circadian rhythm - mammal	7.5159e-05	15	10
9	Colorectal cancer	8.41229e-05	33	19
10	Arrhythmogenic right ventricular cardiomyopathy (ARVC)	0.000115667	36	20
11	Lysine degradation	0.000179294	21	19
12	Regulation of actin cytoskeleton	0.000238083	91	27
13	Calcium signaling pathway	0.000614741	76	27
14	Adherens junction	0.000770969	38	20
15	Prostate cancer	0.000770969	44	20
16	Axon guidance	0.000770969	59	24
17	Glycosaminoglycan biosynthesis - heparan sulfate	0.00150747	11	11
18	Phosphatidylinositol signaling system	0.00165749	35	21
19	Renal cell carcinoma	0.00165749	33	23
20	Non-small cell lung cancer	0.00211119	27	18
21	Pancreatic cancer	0.00308679	34	18
22	Gastric acid secretion	0.00320108	37	21
23	Melanogenesis	0.00321023	44	21
24	MAPK signaling pathway	0.00396959	107	29
25	Neurotrophin signaling pathway	0.00546274	58	26
26	Gap junction	0.0057051	38	23
27	Shigellosis	0.0134529	30	16
28	Ubiquitin mediated proteolysis	0.0134529	62	24
29	Small cell lung cancer	0.0149806	38	21
30	Dilated cardiomyopathy	0.0149806	41	22
31	Cell adhesion molecules (CAMs)	0.0149806	52	23
32	Bacterial invasion of epithelial cells	0.0201021	31	20
33	ErbB signaling pathway	0.0201021	39	23
34	Focal adhesion	0.0213623	79	27
35	Apoptosis	0.0279077	37	18
36	Amyotrophic lateral sclerosis (ALS)	0.0279077	26	18
37	Chronic myeloid leukemia	0.0279077	34	21
38	Hypertrophic cardiomyopathy (HCM)	0.0304339	37	22
39	Inositol phosphate metabolism	0.031824	25	19
40	Vasopressin-regulated water reabsorption	0.0329456	19	17
41	Protein processing in endoplasmic reticulum	0.0334585	62	24
42	Melanoma	0.0342064	32	19
43	Osteoclast differentiation	0.0342999	52	17
44	GnRH signaling pathway	0.0342999	42	25
45	Leukocyte transendothelial migration	0.0459739	44	23
46	Salivary secretion	0.0486369	38	22
